# Supplementary material for: Identification of AKT kinases as unfavorable prognostic factors for hepatocellular carcinoma by a combination of expression profile, interaction network analysis and clinical validation
Source: Royal Society of Chemistry journal article supplement (doi:10.1039/c3mb70400a), 2013-10-14
Supplement: c3mb70400a.pdf [file c3mb70400a.pdf]

**Supporting Information Legends:**

**Table S1** Detailed information on these hepatocellular carcinoma (HCC) significant genes and proteins.

**Table S2** Detailed information on eight existing protein-protein interaction databases

**Table S3** Protein-protein interaction information on hepatocellular carcinoma (HCC) significant proteins

**Table S4** Enrichment analysis of candidate hepatocellular carcinoma (HCC) markers on gene ontology (GO) molecular functions and biological processes, and KEGG pathways.
