# Supplementary material for: Identification of AKT kinases as unfavorable prognostic factors for hepatocellular carcinoma by a combination of expression profile, interaction network analysis and clinical validation
Source: Royal Society of Chemistry journal article supplement (doi:10.1039/c3mb70400a), 2013-10-14
Supplement: c3mb70400a.xlsx [file c3mb70400a.xlsx]

## Sheet: HCC upregulation genes
Gene_Symbol	Protein_UniprotID
AACS	AACS_HUMAN
AACS	Q49AJ4_HUMAN
AACS	Q9H7A6_HUMAN
AACS	Q9H9K9_HUMAN
AADAT	AADAT_HUMAN
AADAT	Q4W5N8_HUMAN
AAK1	AAK1_HUMAN
AAK1	Q9BUD9_HUMAN
AAMP	AAMP_HUMAN
AAMP	Q59EM1_HUMAN
ABCB1	A4D1D2_HUMAN
ABCB1	MDR1_HUMAN
ABCB1	Q59GY9_HUMAN
ABCB1	Q6TBL4_HUMAN
ABCB10	ABCBA_HUMAN
ABCB10	Q6ZMF8_HUMAN
ABCB10	Q9BXW0_HUMAN
ABCB6	ABCB6_HUMAN
ABCC5	MRP5_HUMAN
ABCC5	Q29ZA9_HUMAN
ABCC5	Q29ZB1_HUMAN
ABCC5	Q59FK6_HUMAN
ABCC5	Q59GK6_HUMAN
ABCC5	Q86UX3_HUMAN
ABCC5	Q86W30_HUMAN
ABCC6	A2RRN8_HUMAN
ABCC6	MRP6_HUMAN
ABCC6	Q8TCY8_HUMAN
ABCC9	A6NFG0_HUMAN
ABCC9	ABCC9_HUMAN
ABCC9	Q8N4N7_HUMAN
ABCC9	Q8N9N1_HUMAN
ABCF1	A2BF75_HUMAN
ABCF1	ABCF1_HUMAN
ABCF1	Q2L6I2_HUMAN
ABCF1	Q59F96_HUMAN
ABCF1	Q5STZ7_HUMAN
ABCF1	Q5STZ8_HUMAN
ABCG1	ABCG1_HUMAN
ABCG2	ABCG2_HUMAN
ABCG2	Q4W5I3_HUMAN
ABCG2	Q8WZ76_HUMAN
ABHD12	ABD12_HUMAN
ABI2	ABI2_HUMAN
ABI2	Q13802_HUMAN
ABI2	Q53RS4_HUMAN
ABI2	Q53SH3_HUMAN
ABL2	ABL2_HUMAN
ABL2	B5MEB6_HUMAN
ABL2	B7UEF3_HUMAN
ABL2	B7UEF4_HUMAN
ABL2	B7UEF5_HUMAN
ACACA	ACACA_HUMAN
ACACA	B2ZZ90_HUMAN
ACACA	Q59FY4_HUMAN
ACACA	Q7Z562_HUMAN
ACACA	Q7Z565_HUMAN
ACACA	Q7Z5W8_HUMAN
ACAN	PGCA_HUMAN
ACAN	Q6LE94_HUMAN
ACAN	Q6PID9_HUMAN
ACAT2	Q59GW6_HUMAN
ACAT2	THIC_HUMAN
ACBD3	GCP60_HUMAN
ACLY	ACLY_HUMAN
ACLY	Q4LE36_HUMAN
ACLY	Q8N9C4_HUMAN
ACO2	ACON_HUMAN
ACO2	Q71UF1_HUMAN
ACSL3	ACSL3_HUMAN
ACSL3	B3KMA6_HUMAN
ACSL3	Q6PIM8_HUMAN
ACSL3	Q9P1E5_HUMAN
ACSL4	ACSL4_HUMAN
ACSL4	Q5JWV8_HUMAN
ACSL4	Q8TAF6_HUMAN
ACSS3	ACSS3_HUMAN
ACTA2	ACTA_HUMAN
ACTA2	Q13707_HUMAN
ACTA2	Q5T9N7_HUMAN
ACTB	ACTB_HUMAN
ACTB	Q1KLZ0_HUMAN
ACTB	Q53G76_HUMAN
ACTB	Q53G99_HUMAN
ACTB	Q53GK6_HUMAN
ACTB	Q562L3_HUMAN
ACTB	Q562S0_HUMAN
ACTB	Q9UE89_HUMAN
ACTB	Q9UMN3_HUMAN
ACTC1	ACTC_HUMAN
ACTC1	B3KPP5_HUMAN
ACTL6A	ACL6A_HUMAN
ACTL6A	Q53FS0_HUMAN
ACTL6A	Q6FI97_HUMAN
ACTL8	ACTL8_HUMAN
ACTN1	ACTN1_HUMAN
ACTN1	B3V8S3_HUMAN
ACTN1	Q1HE25_HUMAN
ACTN1	Q5ZEZ4_HUMAN
ACTN1	Q86TX4_HUMAN
ACTR3	ARP3_HUMAN
ACTR3	Q53QM2_HUMAN
ACTR3	Q59FV6_HUMAN
ACTR6	ARP6_HUMAN
ACTR6	Q53GH2_HUMAN
ACTR6	Q7Z4D2_HUMAN
ACTR6	Q9P0A0_HUMAN
ADAM15	ADA15_HUMAN
ADAM15	Q59GF2_HUMAN
ADAM15	Q6R267_HUMAN
ADAM15	Q71S61_HUMAN
ADAM15	Q71S62_HUMAN
ADAM15	Q71S63_HUMAN
ADAM15	Q71S64_HUMAN
ADAM15	Q71S65_HUMAN
ADAM15	Q71S66_HUMAN
ADAM15	Q71S67_HUMAN
ADAM15	Q71S68_HUMAN
ADAM15	Q71S69_HUMAN
ADAM17	ADA17_HUMAN
ADAM17	B2RNB2_HUMAN
ADAM17	Q53RF5_HUMAN
ADAM17	Q53RS1_HUMAN
ADAM17	Q53S40_HUMAN
ADAM17	Q6P5T8_HUMAN
ADAM33	ADA33_HUMAN
ADAM33	Q08AM2_HUMAN
ADAM33	Q08AM3_HUMAN
ADAM33	Q6P5U4_HUMAN
ADAM33	Q7Z7E0_HUMAN
ADAM33	Q7Z7E1_HUMAN
ADAM33	Q7Z7E2_HUMAN
ADAM33	Q7Z7E3_HUMAN
ADAM33	Q7Z7E5_HUMAN
ADAM33	Q8N6B9_HUMAN
ADAM33	Q8N8Z9_HUMAN
ADAM9	ADAM9_HUMAN
ADAMDEC1	ADEC1_HUMAN
ADAMDEC1	B7Z6V5_HUMAN
ADAMDEC1	B7ZAK5_HUMAN
ADAMTS17	ATS17_HUMAN
ADAMTS17	Q2I7G4_HUMAN
ADAMTS17	Q6ZN75_HUMAN
ADAMTS7	ATS7_HUMAN
ADAMTS7	Q59FG3_HUMAN
ADAMTS7	Q9NPM2_HUMAN
ADAMTS7	Q9UFZ4_HUMAN
ADAMTS9	ATS9_HUMAN
ADAR	DSRAD_HUMAN
ADAR	Q59EC0_HUMAN
ADCY5	ADCY5_HUMAN
ADORA1	AA1R_HUMAN
ADORA3	AA3R_HUMAN
ADORA3	Q5QNY7_HUMAN
ADORA3	Q5QNZ3_HUMAN
ADORA3	Q5QNZ4_HUMAN
ADORA3	Q6LD47_HUMAN
ADORA3	Q6P2N6_HUMAN
ADORA3	Q9HBK8_HUMAN
ADSL	PUR8_HUMAN
ADSL	Q71UA4_HUMAN
AFP	FETA_HUMAN
AGBL4	CBPC6_HUMAN
AGBL4	Q96K85_HUMAN
AGPAT1	PLCA_HUMAN
AGPAT1	Q71VH6_HUMAN
AGPAT1	Q9HBM8_HUMAN
AGPAT3	PLCC_HUMAN
AGPAT3	Q8TEB0_HUMAN
AGR2	AGR2_HUMAN
AGR2	Q4JM46_HUMAN
AGR2	Q4JM47_HUMAN
AGR2	Q53G64_HUMAN
AGRN	AGRIN_HUMAN
AGRN	Q15952_HUMAN
AGRN	Q5XG79_HUMAN
AGT	ANGT_HUMAN
AGT	B0ZBE2_HUMAN
AGT	B2R5S1_HUMAN
AGT	Q53GY3_HUMAN
AGT	Q53YY1_HUMAN
AGT	Q59EP2_HUMAN
AGT	Q86U78_HUMAN
AGXT	Q9BXA1_HUMAN
AGXT	Q9UJX1_HUMAN
AGXT	SPYA_HUMAN
AHCTF1	ELYS_HUMAN
AHCTF1	Q96M44_HUMAN
AHDC1	AHDC1_HUMAN
AHNAK	A1A586_HUMAN
AHNAK	AHNK_HUMAN
AHNAK	Q13727_HUMAN
AHNAK	Q6ZQN2_HUMAN
AHNAK	Q8N274_HUMAN
AHNAK	Q96EC4_HUMAN
AHNAK	Q9BVU3_HUMAN
AHSA2	AHSA2_HUMAN
AHSG	FETUA_HUMAN
AIFM2	AIFM2_HUMAN
AKAP1	AKAP1_HUMAN
AKAP13	A8MYJ1_HUMAN
AKAP13	AKP13_HUMAN
AKAP8L	AKP8L_HUMAN
AKAP8L	Q9UF73_HUMAN
AKAP9	AKAP9_HUMAN
AKAP9	Q5GIA7_HUMAN
AKAP9	Q5IBP5_HUMAN
AKAP9	Q6PJH3_HUMAN
AKAP9	Q8IW64_HUMAN
AKAP9	Q96KG3_HUMAN
AKAP9	Q9UFL2_HUMAN
AKR1B1	ALDR_HUMAN
AKR1B1	Q59EL5_HUMAN
AKR1B10	AK1BA_HUMAN
AKR1B10	C9J3V2_HUMAN
AKR1C1	AK1C1_HUMAN
AKR1C2	AK1C2_HUMAN
AKR1C2	B4DKR9_HUMAN
AKR1C2	Q59GU2_HUMAN
AKR1C3	AK1C3_HUMAN
AKR1C3	Q2XPP3_HUMAN
AKR7A3	ARK73_HUMAN
AKT1	AKT1_HUMAN
AKT1	B0LPE5_HUMAN
AKT1	B3KVH4_HUMAN
AKT1	Q9BV07_HUMAN
AKT1S1	AKTS1_HUMAN
AKT2	AKT2_HUMAN
AKT2	Q05BV0_HUMAN
AKT2	Q0VAN0_HUMAN
AKT2	Q6P4H3_HUMAN
AKT2	Q8TBE2_HUMAN
AKT3	AKT3_HUMAN
AKT3	Q56A86_HUMAN
ALDH18A1	P5CS_HUMAN
ALDH3A1	A8K828_HUMAN
ALDH3A1	AL3A1_HUMAN
ALDH3A1	Q6PKA6_HUMAN
ALDH3A1	Q8N9T9_HUMAN
ALDH9A1	AL9A1_HUMAN
ALDH9A1	B9EKV4_HUMAN
ALDOA	ALDOA_HUMAN
ALK	ALK_HUMAN
ALK	Q580I3_HUMAN
ALOX5AP	AL5AP_HUMAN
ALS2CL	AL2CL_HUMAN
ALS2CL	Q8NAL7_HUMAN
ALS2CL	Q8TEK5_HUMAN
ALS2CR4	AL2S4_HUMAN
ALS2CR4	Q8WYG0_HUMAN
AMBP	AMBP_HUMAN
AMBP	P78492_HUMAN
AMMECR1	AMER1_HUMAN
AMN	AMNLS_HUMAN
ANGEL1	ANGE1_HUMAN
ANGPT1	ANGP1_HUMAN
ANGPT1	Q5HYA0_HUMAN
ANGPT1	Q5YLW1_HUMAN
ANGPT1	Q8N6P3_HUMAN
ANGPT2	ANGP2_HUMAN
ANGPT2	B7ZLM7_HUMAN
ANGPT2	Q9H4C0_HUMAN
ANGPT2	Q9H4C1_HUMAN
ANGPT2	Q9HBP3_HUMAN
ANKIB1	AKIB1_HUMAN
ANKIB1	Q4VBX8_HUMAN
ANKIB1	Q58F08_HUMAN
ANKMY2	ANKY2_HUMAN
ANKMY2	Q659G1_HUMAN
ANKRD12	ANR12_HUMAN
ANKRD12	Q3LIB9_HUMAN
ANKRD12	Q6NSE1_HUMAN
ANKRD12	Q6PG48_HUMAN
ANKRD12	Q9NXU3_HUMAN
ANKRD27	ANR27_HUMAN
ANKRD29	ANR29_HUMAN
ANKRD42	ANR42_HUMAN
ANKRD42	Q6P5R7_HUMAN
ANKRD43	ANR43_HUMAN
ANLN	ANLN_HUMAN
ANP32E	AN32E_HUMAN
ANP32E	B4E0I6_HUMAN
ANP32E	Q53F20_HUMAN
ANP32E	Q5TB20_HUMAN
ANPEP	AMPN_HUMAN
ANPEP	Q59E93_HUMAN
ANPEP	Q71E46_HUMAN
ANPEP	Q8IVL7_HUMAN
ANXA1	ANXA1_HUMAN
ANXA1	Q05BR2_HUMAN
ANXA1	Q5T3N0_HUMAN
ANXA1	Q5T3N1_HUMAN
ANXA1	Q5TZZ9_HUMAN
ANXA2	ANXA2_HUMAN
ANXA3	ANXA3_HUMAN
ANXA3	Q59EE3_HUMAN
ANXA5	A8MTE3_HUMAN
ANXA5	ANXA5_HUMAN
ANXA6	A6NN80_HUMAN
ANXA6	ANXA6_HUMAN
ANXA6	Q6ZP35_HUMAN
AP1M2	AP1M2_HUMAN
AP1M2	Q53GI5_HUMAN
AP1S1	AP1S1_HUMAN
AP1S2	AP1S2_HUMAN
AP1S2	Q549M9_HUMAN
AP1S2	Q7Z677_HUMAN
AP2B1	AP2B1_HUMAN
AP2B1	Q68DI0_HUMAN
AP2B1	Q7Z451_HUMAN
AP2B1	Q96EL6_HUMAN
AP3M2	AP3M2_HUMAN
AP3M2	Q7Z472_HUMAN
AP3S1	AP3S1_HUMAN
APEX1	APEX1_HUMAN
APEX1	Q5TZP7_HUMAN
APEX2	APEX2_HUMAN
APH1A	APH1A_HUMAN
APH1A	Q5TB21_HUMAN
APH1A	Q5TB22_HUMAN
API5	API5_HUMAN
API5	B4DGR0_HUMAN
API5	B4DRJ2_HUMAN
APIP	APIP_HUMAN
APOA2	APOA2_HUMAN
APOA2	Q76EI7_HUMAN
APOA4	APOA4_HUMAN
APOA4	Q13784_HUMAN
APOBEC3B	ABC3B_HUMAN
APOBEC3B	Q20WL1_HUMAN
APOC2	APOC2_HUMAN
APOC2	Q6P163_HUMAN
APOE	APOE_HUMAN
APOE	Q13791_HUMAN
APOE	Q6LA97_HUMAN
APOE	Q6LBZ1_HUMAN
APOE	Q8TCZ8_HUMAN
APPBP2	APBP2_HUMAN
APRT	APT_HUMAN
APRT	Q12898_HUMAN
AR	ANDR_HUMAN
AR	Q13771_HUMAN
AR	Q9BZG5_HUMAN
AR	Q9BZG6_HUMAN
AR	Q9BZG7_HUMAN
AR	Q9NUA2_HUMAN
AR	Q9UN21_HUMAN
ARF1	ARF1_HUMAN
ARF3	ARF3_HUMAN
ARFGEF1	B3KMS9_HUMAN
ARFGEF1	BIG1_HUMAN
ARFGEF1	Q59FY5_HUMAN
ARFGEF2	BIG2_HUMAN
ARFGEF2	Q59FR3_HUMAN
ARFGEF2	Q86TH5_HUMAN
ARFRP1	ARFRP_HUMAN
ARFRP1	B3KTR4_HUMAN
ARFRP1	B7ZKX7_HUMAN
ARFRP1	Q9BQK5_HUMAN
ARFRP1	Q9BQK6_HUMAN
ARHGAP24	RHG24_HUMAN
ARHGAP29	RHG29_HUMAN
ARHGEF3	ARHG3_HUMAN
ARID2	ARID2_HUMAN
ARID2	Q4G0S8_HUMAN
ARID2	Q8NBP1_HUMAN
ARID2	Q8WV72_HUMAN
ARID2	Q96SQ4_HUMAN
ARID3A	ARI3A_HUMAN
ARID4B	ARI4B_HUMAN
ARL1	ARL1_HUMAN
ARL1	Q53XB1_HUMAN
ARL2	ARL2_HUMAN
ARL2	Q53YD8_HUMAN
ARL2BP	AR2BP_HUMAN
ARL4A	ARL4A_HUMAN
ARMC1	ARMC1_HUMAN
ARMC4	A8K906_HUMAN
ARMC4	ARMC4_HUMAN
ARMC4	Q5T2S9_HUMAN
ARMC4	Q9NW14_HUMAN
ARMCX2	ARMX2_HUMAN
ARMCX2	Q5H9D7_HUMAN
ARMCX2	Q5H9D8_HUMAN
ARMCX2	Q5H9E0_HUMAN
ARMCX2	Q5H9E1_HUMAN
ARNT	ARNT_HUMAN
ARNT	O43392_HUMAN
ARNT	Q53F30_HUMAN
ARNT	Q59ED4_HUMAN
ARNT	Q9UH46_HUMAN
ARPC1A	ARC1A_HUMAN
ARPC1A	Q53GB6_HUMAN
ARPC1A	Q59GQ0_HUMAN
ARPC1A	Q75MY0_HUMAN
ARPC1B	A4D275_HUMAN
ARPC1B	ARC1B_HUMAN
ARPC2	ARPC2_HUMAN
ARPC2	Q53R19_HUMAN
ARPC2	Q9BXV5_HUMAN
ARPC3	ARPC3_HUMAN
ARPC3	Q2LE71_HUMAN
ARPC5	ARPC5_HUMAN
ARPC5	Q6IPM3_HUMAN
ARRDC2	ARRD2_HUMAN
ASAP1	ASAP1_HUMAN
ASAP1	B2RNV3_HUMAN
ASAP1	Q8WWA4_HUMAN
ASAP1	Q9NYZ7_HUMAN
ASAP2	ASAP2_HUMAN
ASAP2	Q53R39_HUMAN
ASAP2	Q53RS3_HUMAN
ASAP2	Q53RT9_HUMAN
ASAP2	Q8N282_HUMAN
ASCC3	HELC1_HUMAN
ASCC3	Q4G1A0_HUMAN
ASCC3	Q9H5A2_HUMAN
ASF1B	ASF1B_HUMAN
ASH1L	ASH1L_HUMAN
ASNA1	ASNA_HUMAN
ASNS	ASNS_HUMAN
ASNSD1	ASND1_HUMAN
ASPH	ASPH_HUMAN
ASPH	B4DIC9_HUMAN
ASPH	B4DQ07_HUMAN
ASPH	B4E2K4_HUMAN
ASPH	B7ZM95_HUMAN
ASPH	B7ZM96_HUMAN
ASPH	Q6NXR7_HUMAN
ASPH	Q6PJH4_HUMAN
ASPH	Q8TB28_HUMAN
ASPH	Q9H291_HUMAN
ASPH	Q9H2C4_HUMAN
ASPH	Q9NRI0_HUMAN
ASPH	Q9NRI1_HUMAN
ASPM	ASPM_HUMAN
ASPM	B3KWI2_HUMAN
ASPM	Q4G1H0_HUMAN
ASPM	Q4G1H1_HUMAN
ASPM	Q4G1H2_HUMAN
ASPM	Q5VYL4_HUMAN
ATAD2	ATAD2_HUMAN
ATF2	ATF2_HUMAN
ATF2	Q3B7B7_HUMAN
ATF2	Q8TAR1_HUMAN
ATF2	Q96JT8_HUMAN
ATF3	ATF3_HUMAN
ATF3	Q59GS7_HUMAN
ATF3	Q5VTZ2_HUMAN
ATF3	Q5VTZ4_HUMAN
ATF3	Q6ICQ9_HUMAN
ATF3	Q7Z566_HUMAN
ATF3	Q7Z567_HUMAN
ATF3	Q8NG55_HUMAN
ATF3	Q8WYM6_HUMAN
ATF4	ATF4_HUMAN
ATF4	Q6ICP0_HUMAN
ATF4	Q96AQ3_HUMAN
ATF5	A8K3H7_HUMAN
ATF5	ATF5_HUMAN
ATF6	ATF6A_HUMAN
ATF6	Q59H30_HUMAN
ATIC	PUR9_HUMAN
ATL3	ATLA3_HUMAN
ATP1B1	A3KLL5_HUMAN
ATP1B1	AT1B1_HUMAN
ATP1B1	Q58I20_HUMAN
ATP1B1	Q6LEU2_HUMAN
ATP1B3	AT1B3_HUMAN
ATP1B3	Q58I18_HUMAN
ATP2A2	AT2A2_HUMAN
ATP2A2	B4DF05_HUMAN
ATP2B4	AT2B4_HUMAN
ATP2B4	B1APW5_HUMAN
ATP2B4	Q68DH9_HUMAN
ATP2B4	Q7Z3S1_HUMAN
ATP2C1	AT2C1_HUMAN
ATP2C1	Q59G44_HUMAN
ATP4B	ATP4B_HUMAN
ATP5F1	AT5F1_HUMAN
ATP5F1	Q08ET0_HUMAN
ATP5F1	Q53GB3_HUMAN
ATP5F1	Q5QNZ2_HUMAN
ATP5H	A0PJH2_HUMAN
ATP5H	ATP5H_HUMAN
ATP5J2	A6ND55_HUMAN
ATP5J2	ATPK_HUMAN
ATP5J2	C9J108_HUMAN
ATP5J2	Q53FE1_HUMAN
ATP5J2	Q6IBB3_HUMAN
ATP5O	ATPO_HUMAN
ATP5O	Q53HH2_HUMAN
ATP6AP1	A6ZKI4_HUMAN
ATP6AP1	Q8NBT4_HUMAN
ATP6AP1	Q8NF19_HUMAN
ATP6AP1	Q9H0C7_HUMAN
ATP6AP1	VAS1_HUMAN
ATP6AP2	Q96PH0_HUMAN
ATP6AP2	RENR_HUMAN
ATP6V0C	Q8NHD7_HUMAN
ATP6V0C	VATL_HUMAN
ATP6V0E2	Q7Z4R7_HUMAN
ATP6V0E2	VA0E2_HUMAN
ATP6V1A	VATA_HUMAN
ATP6V1B2	Q59HF3_HUMAN
ATP6V1B2	VATB2_HUMAN
ATP6V1C1	VATC1_HUMAN
ATP6V1E1	A8MUE4_HUMAN
ATP6V1E1	A8MUN4_HUMAN
ATP6V1E1	Q53Y06_HUMAN
ATP6V1E1	VATE1_HUMAN
ATP6V1F	A4D1K0_HUMAN
ATP6V1F	VATF_HUMAN
ATP6V1H	B3KUZ7_HUMAN
ATP6V1H	Q8TF11_HUMAN
ATP6V1H	VATH_HUMAN
ATP7A	ATP7A_HUMAN
ATP7A	Q59HD1_HUMAN
ATP7A	Q762B6_HUMAN
ATR	ATR_HUMAN
ATRN	ATRN_HUMAN
ATRN	Q96D99_HUMAN
ATXN1L	ATX1L_HUMAN
AURKA	Q5QPD1_HUMAN
AURKA	Q5QPD2_HUMAN
AURKA	Q5QPD4_HUMAN
AURKA	STK6_HUMAN
AURKB	AURKB_HUMAN
AURKB	C7G533_HUMAN
AXIN1	AXN1_HUMAN
AXIN1	Q59H83_HUMAN
AXIN2	AXN2_HUMAN
AXIN2	Q5H9R8_HUMAN
AXIN2	Q9BRF5_HUMAN
AZU1	CAP7_HUMAN
AZU1	Q86SR2_HUMAN
B2M	B2MG_HUMAN
B2M	Q16446_HUMAN
B2M	Q9UM88_HUMAN
B3GALNT2	B3GL2_HUMAN
B3GNT5	B3GN5_HUMAN
B4GALT1	B4GT1_HUMAN
B4GALT1	Q86XA6_HUMAN
B4GALT3	B4GT3_HUMAN
B4GALT3	Q71VA3_HUMAN
BAD	BAD_HUMAN
BAD	Q6FH21_HUMAN
BAGE5	BAGE2_HUMAN
BAGE5	BAGE3_HUMAN
BAGE5	BAGE4_HUMAN
BAGE5	BAGE5_HUMAN
BAIAP2L1	BI2L1_HUMAN
BAIAP2L2	BI2L2_HUMAN
BAIAP2L2	Q9H661_HUMAN
BAK1	BAK2_HUMAN
BAK1	BAK_HUMAN
BAK1	Q5HCI0_HUMAN
BAK1	Q8NFF3_HUMAN
BAMBI	BAMBI_HUMAN
BAMBI	Q53G66_HUMAN
BAMBI	Q9NXZ6_HUMAN
BANF1	BAF_HUMAN
BASP1	BASP1_HUMAN
BAT2L2	BA2D1_HUMAN
BAX	BAX_HUMAN
BAX	Q5ZPJ0_HUMAN
BAX	Q5ZPJ1_HUMAN
BAX	Q8WXU1_HUMAN
BAX	Q9UEI8_HUMAN
BAZ1B	BAZ1B_HUMAN
BBS2	BBS2_HUMAN
BBS2	Q59H54_HUMAN
BBS2	Q8ND60_HUMAN
BBX	A8K6U2_HUMAN
BBX	BBX_HUMAN
BBX	Q6ZNU6_HUMAN
BBX	Q9H6A7_HUMAN
BBX	Q9H6G9_HUMAN
BBX	Q9NRU5_HUMAN
BBX	Q9P043_HUMAN
BCAP31	B3KQ79_HUMAN
BCAP31	BAP31_HUMAN
BCAP31	Q53G72_HUMAN
BCAP31	Q53HT6_HUMAN
BCAT1	B3KY27_HUMAN
BCAT1	BCAT1_HUMAN
BCAT1	Q68DQ7_HUMAN
BCAT1	Q6ZV92_HUMAN
BCAT2	BCAT2_HUMAN
BCAT2	Q53EW7_HUMAN
BCL2L11	B2L11_HUMAN
BCL2L11	Q6JTU4_HUMAN
BCL2L11	Q8WXB2_HUMAN
BCOR	BCOR_HUMAN
BCORL1	BCORL_HUMAN
BCORL1	Q86YA6_HUMAN
BCORL1	Q9HAM3_HUMAN
BDKRB2	BKRB2_HUMAN
BDKRB2	Q68DM8_HUMAN
BDKRB2	Q6LAU9_HUMAN
BDP1	BDP1_HUMAN
BECN1	BECN1_HUMAN
BECN1	Q53F78_HUMAN
BEND5	BEND5_HUMAN
BEX2	BEX2_HUMAN
BID	A8ASI8_HUMAN
BID	B2ZP79_HUMAN
BID	B3KT21_HUMAN
BID	BID_HUMAN
BID	Q71RF7_HUMAN
BIK	BIK_HUMAN
BIRC3	BIRC3_HUMAN
BIRC5	BIRC5_HUMAN
BIRC5	Q969L1_HUMAN
BLZF1	GO45_HUMAN
BLZF1	Q53EV6_HUMAN
BLZF1	Q5T532_HUMAN
BLZF1	Q5T534_HUMAN
BMI1	BMI1_HUMAN
BMI1	Q5T8Z1_HUMAN
BMI1	Q5T8Z2_HUMAN
BMI1	Q5T8Z3_HUMAN
BMI1	Q5T8Z4_HUMAN
BMI1	Q5T8Z5_HUMAN
BMI1	Q5T8Z6_HUMAN
BMI1	Q5U0M5_HUMAN
BMI1	Q6IB93_HUMAN
BMP4	BMP4_HUMAN
BMP4	Q53XC5_HUMAN
BMP8A	BMP8A_HUMAN
BMP8A	Q4G0H3_HUMAN
BMP8A	Q9H7R1_HUMAN
BMP8B	BMP8B_HUMAN
BMP8B	Q32NE5_HUMAN
BMS1	BMS1_HUMAN
BMS1	Q5QPT5_HUMAN
BOLA1	BOLA1_HUMAN
BPTF	BPTF_HUMAN
BPTF	Q86TN2_HUMAN
BPTF	Q9H5E0_HUMAN
BRCA1	BRCA1_HUMAN
BRCA1	Q05BZ9_HUMAN
BRCA1	Q1RMC1_HUMAN
BRCA1	Q3B890_HUMAN
BRCA1	Q3B891_HUMAN
BRCA1	Q3LRH8_HUMAN
BRCA1	Q3LRJ6_HUMAN
BRCA1	Q3YB49_HUMAN
BRCA1	Q3YB50_HUMAN
BRCA1	Q3YB52_HUMAN
BRCA1	Q3YB53_HUMAN
BRCA1	Q4EW25_HUMAN
BRCA1	Q5U3B7_HUMAN
BRCA1	Q5XLT4_HUMAN
BRCA1	Q5YLB2_HUMAN
BRCA1	Q64FK2_HUMAN
BRCA1	Q64FK3_HUMAN
BRCA1	Q6IN79_HUMAN
BRCA1	Q6P671_HUMAN
BRCA1	Q7KYU6_HUMAN
BRCA1	Q7Z606_HUMAN
BRCA1	Q8IU58_HUMAN
BRCA1	Q8IZK2_HUMAN
BRCA1	Q8IZK4_HUMAN
BRCA1	Q92897_HUMAN
BRCA1	Q9NQR3_HUMAN
BRCA1	Q9UE29_HUMAN
BRMS1	BRMS1_HUMAN
BRMS1	Q9Y3T1_HUMAN
BRP44	BR44_HUMAN
BRP44	Q5R3B4_HUMAN
BSG	A6NJW1_HUMAN
BSG	BASI_HUMAN
BSG	Q54A51_HUMAN
BSND	BSND_HUMAN
BSND	Q5VU50_HUMAN
BST2	BST2_HUMAN
BST2	Q7Z5Z8_HUMAN
BTBD1	A6NMI8_HUMAN
BTBD1	BTBD1_HUMAN
BTBD1	Q3ZTS5_HUMAN
BTG1	BTG1_HUMAN
BTG1	Q6IBC8_HUMAN
BTG3	BTG3_HUMAN
BTG3	Q6IAU3_HUMAN
BTG3	Q9UHB2_HUMAN
BTN2A1	BT2A1_HUMAN
BTN2A1	Q59EN4_HUMAN
BTN2A1	Q96AV7_HUMAN
BTN2A1	Q9H459_HUMAN
BTN2A2	A6NM84_HUMAN
BTN2A2	BT2A2_HUMAN
BUB1	BUB1_HUMAN
BUB1	Q53QE4_HUMAN
BUB1	Q9BXX5_HUMAN
BUB1B	BUB1B_HUMAN
BUB3	BUB3_HUMAN
BZW2	BZW2_HUMAN
BZW2	Q05D83_HUMAN
BZW2	Q75MG1_HUMAN
BZW2	Q96JW5_HUMAN
C10orf26	OPA1L_HUMAN
C10orf26	Q1EG67_HUMAN
C10orf26	Q1EG68_HUMAN
C10orf26	Q1EG69_HUMAN
C10orf26	Q9NXM7_HUMAN
C10orf35	CJ035_HUMAN
C10orf82	CJ082_HUMAN
C11orf17	BCA3_HUMAN
C11orf31	SELH_HUMAN
C11orf58	SMAP_HUMAN
C11orf63	B3KUM2_HUMAN
C11orf63	CK063_HUMAN
C11orf76	CK076_HUMAN
C12orf32	CL032_HUMAN
C12orf4	CL004_HUMAN
C12orf4	CL040_HUMAN
C12orf57	C10_HUMAN
C12orf60	CL060_HUMAN
C12orf73	CL073_HUMAN
C12orf75	OCC1_HUMAN
C13orf15	RGC32_HUMAN
C13orf33	CM033_HUMAN
C13orf33	Q5VYS3_HUMAN
C13orf37	CM037_HUMAN
C14orf119	CN119_HUMAN
C14orf129	GSKIP_HUMAN
C14orf166	CN166_HUMAN
C14orf166	Q549M8_HUMAN
C14orf166	Q5RLJ0_HUMAN
C14orf4	EAP1_HUMAN
C15orf17	CO017_HUMAN
C15orf23	C9J424_HUMAN
C15orf23	T4AF1_HUMAN
C15orf40	CO040_HUMAN
C15orf41	CO041_HUMAN
C16orf58	CP058_HUMAN
C16orf62	CP062_HUMAN
C16orf72	CP072_HUMAN
C16orf72	Q9UI82_HUMAN
C16orf80	CP080_HUMAN
C17orf79	COPR5_HUMAN
C18orf10	TPGS2_HUMAN
C19orf25	CS025_HUMAN
C19orf29	A9UL12_HUMAN
C19orf29	CS029_HUMAN
C19orf40	FAP24_HUMAN
C19orf48	CS048_HUMAN
C19orf6	B3KTL0_HUMAN
C19orf6	MBRL_HUMAN
C19orf6	Q8IWT9_HUMAN
C1QC	C1QC_HUMAN
C1orf106	B4E1K9_HUMAN
C1orf106	CA106_HUMAN
C1orf128	CA128_HUMAN
C1orf25	TRM1L_HUMAN
C1orf43	CA043_HUMAN
C1orf43	Q09GN0_HUMAN
C1orf56	CA056_HUMAN
C1orf63	CA063_HUMAN
C1orf77	CA077_HUMAN
C1orf77	Q5T7Y7_HUMAN
C1orf77	Q5T7Y9_HUMAN
C1orf85	NCUG1_HUMAN
C1orf9	CA009_HUMAN
C20orf24	CT024_HUMAN
C20orf24	Q5QPG6_HUMAN
C20orf24	Q9BZT8_HUMAN
C20orf3	APMAP_HUMAN
C20orf30	CT030_HUMAN
C20orf79	CT079_HUMAN
C20orf79	Q6X959_HUMAN
C21orf2	CU002_HUMAN
C21orf2	Q59F82_HUMAN
C21orf2	Q8N5X6_HUMAN
C21orf45	MS18A_HUMAN
C22orf28	CV028_HUMAN
C22orf29	CV029_HUMAN
C2orf24	CB024_HUMAN
C2orf27A	CB027_HUMAN
C2orf88	CB088_HUMAN
C2orf88	YB053_HUMAN
C3	CO3_HUMAN
C3	Q6LDJ0_HUMAN
C4B	A7E2V2_HUMAN
C4B	CO4B_HUMAN
C4B	Q6U2E0_HUMAN
C4B	Q6U2E5_HUMAN
C4B	Q6U2E9_HUMAN
C4B	Q6U2F3_HUMAN
C4B	Q6U2F4_HUMAN
C4B	Q6U2F6_HUMAN
C4B	Q6U2G0_HUMAN
C4B	Q6U2G1_HUMAN
C4B	Q6U2H4_HUMAN
C4B	Q6U2I5_HUMAN
C4B	Q6U2L1_HUMAN
C4B	Q6U2L6_HUMAN
C4B	Q6U2L7_HUMAN
C4B	Q6U2L9_HUMAN
C4B	Q6U2M2_HUMAN
C4B	Q6U2M5_HUMAN
C4B	Q6VCV8_HUMAN
C4B	Q6XMI6_HUMAN
C4B	Q96SA7_HUMAN
C4B	Q96SA8_HUMAN
C4B	Q9UMV1_HUMAN
C4B	Q9UNU2_HUMAN
C5orf13	B7Z5D2_HUMAN
C5orf13	NP311_HUMAN
C5orf13	Q9P187_HUMAN
C5orf24	CE024_HUMAN
C5orf28	CE028_HUMAN
C5orf28	Q6GMT5_HUMAN
C5orf32	CE032_HUMAN
C5orf36	CE036_HUMAN
C6orf136	A9R9P8_HUMAN
C6orf136	A9R9P9_HUMAN
C6orf136	CF136_HUMAN
C6orf136	Q0P5T2_HUMAN
C6orf165	CF165_HUMAN
C6orf165	Q8N771_HUMAN
C6orf173	CENPW_HUMAN
C6orf192	B3KW77_HUMAN
C6orf192	CF192_HUMAN
C6orf192	Q5TBJ2_HUMAN
C6orf211	CF211_HUMAN
C6orf48	G8_HUMAN
C6orf48	Q9UBA7_HUMAN
C6orf62	CF062_HUMAN
C6orf81	CF081_HUMAN
C7orf25	CG025_HUMAN
C7orf27	CG027_HUMAN
C7orf27	Q6ZNJ8_HUMAN
C7orf27	Q6ZNL1_HUMAN
C7orf27	Q9H7L8_HUMAN
C7orf28B	CG028_HUMAN
C7orf28B	Q7L8P3_HUMAN
C7orf30	A4D154_HUMAN
C7orf30	CG030_HUMAN
C8G	CO8G_HUMAN
C8orf33	CH033_HUMAN
C8orf47	CH047_HUMAN
C8orf76	CH076_HUMAN
C8orf76	Q96EF9_HUMAN
C9orf100	CI100_HUMAN
C9orf11	AFAF_HUMAN
C9orf11	B7ZMK1_HUMAN
C9orf125	CI125_HUMAN
C9orf125	Q24K26_HUMAN
C9orf16	CI016_HUMAN
C9orf16	Q9Y3F6_HUMAN
C9orf5	CI005_HUMAN
C9orf91	CI091_HUMAN
CABLES2	CABL2_HUMAN
CACYBP	B3KSF1_HUMAN
CACYBP	CYBP_HUMAN
CACYBP	Q5R370_HUMAN
CACYBP	Q5R371_HUMAN
CACYBP	Q6NVY0_HUMAN
CADM1	CADM1_HUMAN
CADM1	Q6MZK6_HUMAN
CALCR	A4D1G6_HUMAN
CALCR	CALCR_HUMAN
CALCR	Q5ZGL8_HUMAN
CALCR	Q659U6_HUMAN
CALM2	B4DJ51_HUMAN
CALM2	CALM_HUMAN
CALM2	Q96HY3_HUMAN
CALM2	Q9BRL5_HUMAN
CALR	CALR_HUMAN
CALR	Q53G71_HUMAN
CALU	B3KNG6_HUMAN
CALU	CALU_HUMAN
CALU	Q6IAW5_HUMAN
CAMK2G	KCC2G_HUMAN
CAMK2G	O00561_HUMAN
CAMK2G	Q13280_HUMAN
CAMK2G	Q59FI6_HUMAN
CAMK2G	Q5SWX3_HUMAN
CAMK2G	Q5SWX4_HUMAN
CAMK2G	Q8WU40_HUMAN
CAMLG	A1L3Y3_HUMAN
CAMLG	CAMLG_HUMAN
CAMSAP1L1	B3KTI4_HUMAN
CAMSAP1L1	CAMP2_HUMAN
CAND1	CAND1_HUMAN
CANX	CALX_HUMAN
CANX	Q6ZP56_HUMAN
CAP1	CAP1_HUMAN
CAP1	Q5T0R1_HUMAN
CAP1	Q5T0R2_HUMAN
CAP1	Q5T0R3_HUMAN
CAP1	Q5T0R4_HUMAN
CAP1	Q5T0R5_HUMAN
CAP1	Q5T0R6_HUMAN
CAP1	Q5T0R7_HUMAN
CAP1	Q5T0R8_HUMAN
CAP1	Q5T0R9_HUMAN
CAP2	CAP2_HUMAN
CAP2	Q5JPJ8_HUMAN
CAP2	Q9BYW9_HUMAN
CAPG	CAPG_HUMAN
CAPN1	CAN1_HUMAN
CAPN2	B4DN77_HUMAN
CAPN2	B7ZA96_HUMAN
CAPN2	CAN2_HUMAN
CAPN2	Q59EF6_HUMAN
CAPN2	Q6ZVC6_HUMAN
CAPN7	CAN7_HUMAN
CAPN7	Q7Z479_HUMAN
CAPS	CAYP1_HUMAN
CAPS	Q8NF12_HUMAN
CAPS	Q96ET4_HUMAN
CAPZA2	A4D0V4_HUMAN
CAPZA2	CAZA2_HUMAN
CAPZA2	Q53GC7_HUMAN
CAPZA2	Q53GE2_HUMAN
CARD18	CAR18_HUMAN
CARM1	A6NN38_HUMAN
CARM1	CARM1_HUMAN
CASC5	CASC5_HUMAN
CASC5	Q05C46_HUMAN
CASK	CSKP_HUMAN
CASK	Q5JS79_HUMAN
CASP2	CASP2_HUMAN
CASP2	Q9BZL0_HUMAN
CASP3	CASP3_HUMAN
CASP3	Q5HYI3_HUMAN
CASP7	CASP7_HUMAN
CASP7	Q5SVL2_HUMAN
CASP9	CASP9_HUMAN
CASP9	Q59GG2_HUMAN
CASP9	Q5JRU2_HUMAN
CASP9	Q5JRU8_HUMAN
CASP9	Q5UGI1_HUMAN
CASP9	Q6EV95_HUMAN
CAST	ICAL_HUMAN
CAST	Q13940_HUMAN
CAST	Q15786_HUMAN
CAST	Q59HE3_HUMAN
CAST	Q6AZE3_HUMAN
CAST	Q7KYS9_HUMAN
CAST	Q86YM9_HUMAN
CAST	Q9Y2M4_HUMAN
CAV1	CAV1_HUMAN
CAV1	Q2TNI1_HUMAN
CAV1	Q59E85_HUMAN
CAV1	Q71VB8_HUMAN
CAV1	Q7Z4F3_HUMAN
CBFA2T2	MTG8R_HUMAN
CBFA2T2	Q59G03_HUMAN
CBFA2T2	Q5TGE8_HUMAN
CBFA2T2	Q68DC6_HUMAN
CBLB	A8K9S7_HUMAN
CBLB	B3KSS7_HUMAN
CBLB	CBLB_HUMAN
CBLB	Q68CY2_HUMAN
CBWD1	CBWD1_HUMAN
CBWD1	CBWD6_HUMAN
CBWD1	Q4V338_HUMAN
CBWD1	Q4V340_HUMAN
CBWD1	Q4V342_HUMAN
CBWD1	Q9HAZ6_HUMAN
CBX1	CBX1_HUMAN
CBX1	Q6IBN6_HUMAN
CBX1	Q9Y654_HUMAN
CBX2	CBX2_HUMAN
CBX3	A4D177_HUMAN
CBX3	CBX3_HUMAN
CC2D1A	C2D1A_HUMAN
CC2D1A	Q9H8P7_HUMAN
CC2D1A	Q9NX28_HUMAN
CCAR1	CCAR1_HUMAN
CCDC104	CC104_HUMAN
CCDC117	CC117_HUMAN
CCDC120	A8K5Q5_HUMAN
CCDC120	B4DF24_HUMAN
CCDC120	B4DFC1_HUMAN
CCDC120	B4DTU2_HUMAN
CCDC120	CC120_HUMAN
CCDC132	CC132_HUMAN
CCDC132	Q5JPD9_HUMAN
CCDC132	Q75N11_HUMAN
CCDC132	Q75N12_HUMAN
CCDC132	Q9NXR2_HUMAN
CCDC14	B8ZZ58_HUMAN
CCDC14	CCD14_HUMAN
CCDC144B	C144A_HUMAN
CCDC144B	C144B_HUMAN
CCDC21	CCD21_HUMAN
CCDC21	Q9NTB2_HUMAN
CCDC25	CCD25_HUMAN
CCDC25	Q0P663_HUMAN
CCDC25	Q0VGD4_HUMAN
CCDC25	Q6PK69_HUMAN
CCDC25	Q7Z5U5_HUMAN
CCDC34	CCD34_HUMAN
CCDC39	CCD39_HUMAN
CCDC55	CCD55_HUMAN
CCDC55	Q05DD5_HUMAN
CCDC55	Q9P0E1_HUMAN
CCDC62	CCD62_HUMAN
CCDC66	CCD66_HUMAN
CCDC76	Q5VVK9_HUMAN
CCDC76	Q5VVL2_HUMAN
CCDC76	TRM13_HUMAN
CCDC88A	GRDN_HUMAN
CCDC88A	Q6DCA5_HUMAN
CCDC88A	Q6PAV0_HUMAN
CCDC88A	Q86YH1_HUMAN
CCDC88A	Q9NW05_HUMAN
CCDC88A	Q9UI01_HUMAN
CCDC88A	Q9ULK8_HUMAN
CCDC88C	DAPLE_HUMAN
CCDC88C	Q0P665_HUMAN
CCDC88C	Q9H9V0_HUMAN
CCDC93	CCD93_HUMAN
CCDC93	Q4ZG73_HUMAN
CCL20	CCL20_HUMAN
CCL4	CC4L_HUMAN
CCL4	CCL4_HUMAN
CCL4	Q6JSE0_HUMAN
CCL4	Q7M4M2_HUMAN
CCL5	CCL5_HUMAN
CCL5	D0EI67_HUMAN
CCL5	Q9UBL2_HUMAN
CCL7	CCL7_HUMAN
CCL7	Q7Z7Q8_HUMAN
CCNA2	CCNA2_HUMAN
CCNB1	CCNB1_HUMAN
CCNB1	Q5TZP9_HUMAN
CCNB1	Q9BPX9_HUMAN
CCNB1	Q9BWU7_HUMAN
CCNB1	Q9BWU8_HUMAN
CCNB1	Q9BWU9_HUMAN
CCNB1	Q9BWV0_HUMAN
CCNB1IP1	CIP1_HUMAN
CCNB2	CCNB2_HUMAN
CCNB2	Q53HG9_HUMAN
CCNB2	Q5U0M0_HUMAN
CCNB2	Q7Z4Z4_HUMAN
CCND1	CCND1_HUMAN
CCND1	Q14092_HUMAN
CCND1	Q5MGB2_HUMAN
CCND1	Q6FI00_HUMAN
CCND1	Q9H014_HUMAN
CCNE1	CCNE1_HUMAN
CCNE2	CCNE2_HUMAN
CCNE2	Q8WUE3_HUMAN
CCNG1	CCNG1_HUMAN
CCNG1	Q7Z396_HUMAN
CCNYL1	CCYL1_HUMAN
CCRN4L	NOCT_HUMAN
CCRN4L	Q8WTX0_HUMAN
CCT2	Q9H369_HUMAN
CCT2	TCPB_HUMAN
CCT3	A6NE14_HUMAN
CCT3	B3KX11_HUMAN
CCT3	Q2TU64_HUMAN
CCT3	Q59H77_HUMAN
CCT3	Q5SZY0_HUMAN
CCT3	TCPG_HUMAN
CCT4	TCPD_HUMAN
CCT5	Q96GI1_HUMAN
CCT5	Q9BU08_HUMAN
CCT5	Q9HB74_HUMAN
CCT5	TCPE_HUMAN
CCT6A	A6NCD2_HUMAN
CCT6A	Q59ET3_HUMAN
CCT6A	TCPZ_HUMAN
CCT7	A8MWI8_HUMAN
CCT7	B7Z4T9_HUMAN
CCT7	B7Z4Z7_HUMAN
CCT7	Q53HV2_HUMAN
CCT7	Q6IBT3_HUMAN
CCT7	TCPH_HUMAN
CD109	CD109_HUMAN
CD109	Q5XUM6_HUMAN
CD109	Q5XUM8_HUMAN
CD109	Q5XUN0_HUMAN
CD109	Q5XUN1_HUMAN
CD151	CD151_HUMAN
CD151	Q53FU5_HUMAN
CD151	Q6ZNZ0_HUMAN
CD163	C163A_HUMAN
CD164	MUC24_HUMAN
CD19	CD19_HUMAN
CD19	Q6ZNU2_HUMAN
CD19	Q71UW0_HUMAN
CD200	OX2G_HUMAN
CD24	B6EC88_HUMAN
CD24	CD24_HUMAN
CD2AP	CD2AP_HUMAN
CD300A	CLM8_HUMAN
CD300A	Q9P0F3_HUMAN
CD300LG	C9JGW2_HUMAN
CD300LG	CLM9_HUMAN
CD34	CD34_HUMAN
CD34	Q3C1E7_HUMAN
CD34	Q5JTA5_HUMAN
CD34	Q7Z375_HUMAN
CD34	Q8IUM0_HUMAN
CD34	Q9UH97_HUMAN
CD37	CD37_HUMAN
CD37	Q96LM7_HUMAN
CD40	Q09LL4_HUMAN
CD40	Q59F01_HUMAN
CD40	Q6P2H9_HUMAN
CD40	TNR5_HUMAN
CD40LG	CD40L_HUMAN
CD40LG	Q3L8U2_HUMAN
CD40LG	Q3LFI8_HUMAN
CD40LG	Q45QX2_HUMAN
CD44	CD44_HUMAN
CD44	O95370_HUMAN
CD44	Q86UZ1_HUMAN
CD44	Q99900_HUMAN
CD44	Q9H5A3_HUMAN
CD44	Q9H5A4_HUMAN
CD44	Q9H5A6_HUMAN
CD44	Q9H5A7_HUMAN
CD44	Q9P2Z2_HUMAN
CD46	MCP_HUMAN
CD46	Q06C42_HUMAN
CD46	Q92494_HUMAN
CD47	CD47_HUMAN
CD47	Q71A41_HUMAN
CD55	DAF_HUMAN
CD55	Q14UF2_HUMAN
CD55	Q14UF3_HUMAN
CD55	Q14UF4_HUMAN
CD55	Q14UF5_HUMAN
CD55	Q14UF6_HUMAN
CD55	Q76N74_HUMAN
CD55	Q8TD11_HUMAN
CD55	Q8TD12_HUMAN
CD55	Q8TD13_HUMAN
CD55	Q8TD14_HUMAN
CD68	B4DVT4_HUMAN
CD68	CD68_HUMAN
CD70	CD70_HUMAN
CD70	Q53XX4_HUMAN
CD9	CD9_HUMAN
CD9	Q56CY1_HUMAN
CD99	A6NIW1_HUMAN
CD99	CD99_HUMAN
CDAN1	CDAN1_HUMAN
CDC123	CD123_HUMAN
CDC20	CDC20_HUMAN
CDC23	CDC23_HUMAN
CDC25A	MPIP1_HUMAN
CDC25B	B3KS38_HUMAN
CDC25B	MPIP2_HUMAN
CDC25B	Q6MZW8_HUMAN
CDC25B	Q7LDQ7_HUMAN
CDC27	CDC27_HUMAN
CDC34	UB2R1_HUMAN
CDC37	CDC37_HUMAN
CDC37	Q6FG59_HUMAN
CDC42BPA	MRCKA_HUMAN
CDC42BPA	Q5HYB0_HUMAN
CDC42BPA	Q5T799_HUMAN
CDC42BPA	Q5T7A0_HUMAN
CDC42BPA	Q5T7A7_HUMAN
CDC42BPA	Q8IWQ7_HUMAN
CDC42BPA	Q9H5K7_HUMAN
CDC42BPA	Q9NYF6_HUMAN
CDC42EP1	BORG5_HUMAN
CDC42SE1	C42S1_HUMAN
CDC45	CC45L_HUMAN
CDC6	CDC6_HUMAN
CDC7	B2R6V2_HUMAN
CDC7	CDC7_HUMAN
CDC7	Q59FX2_HUMAN
CDC7	Q6JSD6_HUMAN
CDCA3	B2R749_HUMAN
CDCA3	CDCA3_HUMAN
CDCA5	CDCA5_HUMAN
CDCA7	CDCA7_HUMAN
CDCA7L	A8K8X5_HUMAN
CDCA7L	B3KTR5_HUMAN
CDCA7L	B4DUT3_HUMAN
CDCA7L	C9K0Y1_HUMAN
CDCA7L	CDA7L_HUMAN
CDCA8	BOREA_HUMAN
CDH11	CAD11_HUMAN
CDH11	Q59EQ1_HUMAN
CDH11	Q96CZ9_HUMAN
CDH17	B2R778_HUMAN
CDH17	CAD17_HUMAN
CDH8	CADH8_HUMAN
CDH8	Q3LID3_HUMAN
CDK1	B7Z3D6_HUMAN
CDK1	CDC2_HUMAN
CDK1	Q5H9N4_HUMAN
CDK10	B7Z537_HUMAN
CDK10	CDK10_HUMAN
CDK10	Q59EI2_HUMAN
CDK10	Q9UHL7_HUMAN
CDK19	CDK19_HUMAN
CDK19	Q5JQZ9_HUMAN
CDK19	Q9UFE3_HUMAN
CDK2	CDK2_HUMAN
CDK2	O75100_HUMAN
CDK2AP2	CDKA2_HUMAN
CDK2AP2	Q6IAV4_HUMAN
CDK4	CDK4_HUMAN
CDK4	Q6LC83_HUMAN
CDK4	Q96BE9_HUMAN
CDK5RAP2	B3KVI2_HUMAN
CDK5RAP2	CK5P2_HUMAN
CDK5RAP2	Q05CZ3_HUMAN
CDK5RAP2	Q5CZA0_HUMAN
CDK5RAP2	Q5JTU8_HUMAN
CDK5RAP2	Q5JTU9_HUMAN
CDK5RAP2	Q5JV18_HUMAN
CDK5RAP2	Q66GT8_HUMAN
CDK5RAP2	Q6MZT4_HUMAN
CDK5RAP2	Q7Z3M0_HUMAN
CDK6	A4D1G0_HUMAN
CDK6	CDK6_HUMAN
CDK7	CDK7_HUMAN
CDK8	CDK8_HUMAN
CDK8	Q64FY6_HUMAN
CDK9	CDK9_HUMAN
CDKN2A	CD2A1_HUMAN
CDKN2A	CD2A2_HUMAN
CDKN2A	Q208B5_HUMAN
CDKN2A	Q2MJK0_HUMAN
CDKN2A	Q5ZEY9_HUMAN
CDKN2A	Q9UPB7_HUMAN
CDKN2AIPNL	C2AIL_HUMAN
CDKN2B	CDN2B_HUMAN
CDKN2B	O15125_HUMAN
CDKN2B	Q5ZEY8_HUMAN
CDKN2B	Q86WJ4_HUMAN
CDKN2B	Q8NIA6_HUMAN
CDKN2B	Q9UM95_HUMAN
CDKN2C	CDN2C_HUMAN
CDKN2C	Q6ICV4_HUMAN
CDKN2C	Q9P1T2_HUMAN
CDKN3	CDKN3_HUMAN
CDKN3	Q86SK7_HUMAN
CDKN3	Q86SK8_HUMAN
CDKN3	Q9BPV5_HUMAN
CDKN3	Q9BY34_HUMAN
CDKN3	Q9C043_HUMAN
CDKN3	Q9C044_HUMAN
CDKN3	Q9C045_HUMAN
CDKN3	Q9C048_HUMAN
CDKN3	Q9C050_HUMAN
CDSN	CDSN_HUMAN
CDSN	Q0EFA5_HUMAN
CDSN	Q2L6G8_HUMAN
CDSN	Q7Z559_HUMAN
CDSN	Q7Z560_HUMAN
CDT1	CDT1_HUMAN
CDV3	B3KUC2_HUMAN
CDV3	CDV3_HUMAN
CEACAM5	CEAM5_HUMAN
CEACAM5	P78448_HUMAN
CEACAM5	Q13984_HUMAN
CEACAM5	Q53G30_HUMAN
CEACAM5	Q68DM9_HUMAN
CEACAM5	Q7KZ28_HUMAN
CEACAM5	Q8N4D0_HUMAN
CEACAM6	CEAM6_HUMAN
CEACAM6	Q13985_HUMAN
CEACAM6	Q14921_HUMAN
CEACAM6	Q14922_HUMAN
CEBPA	CEBPA_HUMAN
CEBPA	Q6P3S4_HUMAN
CEBPA	Q92657_HUMAN
CENPA	CENPA_HUMAN
CENPE	CENPE_HUMAN
CENPF	CENPF_HUMAN
CENPF	Q9UHT7_HUMAN
CENPH	CENPH_HUMAN
CENPI	CENPI_HUMAN
CENPI	Q5JX01_HUMAN
CENPI	Q5JX02_HUMAN
CENPJ	CENPJ_HUMAN
CENPJ	Q2KHM5_HUMAN
CENPJ	Q569I1_HUMAN
CENPJ	Q5JPD5_HUMAN
CENPJ	Q5T6R6_HUMAN
CENPJ	Q9C061_HUMAN
CENPJ	Q9NZ89_HUMAN
CENPK	CENPK_HUMAN
CENPL	CENPL_HUMAN
CENPL	Q96MW3_HUMAN
CENPM	B1AHQ9_HUMAN
CENPM	CENPM_HUMAN
CENPQ	CENPQ_HUMAN
CEP152	CE152_HUMAN
CEP152	Q3B7A2_HUMAN
CEP170	CE170_HUMAN
CEP170	Q6AZE1_HUMAN
CEP170	Q9NSN9_HUMAN
CEP170L	C170L_HUMAN
CEP350	CE350_HUMAN
CEP350	Q05D72_HUMAN
CEP350	Q5T2X2_HUMAN
CEP350	Q5T2X4_HUMAN
CEP350	Q7LGH1_HUMAN
CEP55	CEP55_HUMAN
CEP68	CEP68_HUMAN
CEP68	Q05C09_HUMAN
CEP68	Q53RN6_HUMAN
CEP68	Q5HYA6_HUMAN
CEP97	CEP97_HUMAN
CETN2	CETN2_HUMAN
CFB	CFAB_HUMAN
CFB	Q53F89_HUMAN
CFH	CFAH_HUMAN
CFH	Q14006_HUMAN
CFH	Q5TFM2_HUMAN
CFL1	COF1_HUMAN
CGGBP1	CGBP1_HUMAN
CHAF1A	CAF1A_HUMAN
CHCHD8	CHCH8_HUMAN
CHD1L	CHD1L_HUMAN
CHD1L	Q9H678_HUMAN
CHD2	CHD2_HUMAN
CHD2	Q3YLD5_HUMAN
CHD2	Q3YLD6_HUMAN
CHD2	Q6AI05_HUMAN
CHD2	Q8N677_HUMAN
CHD2	Q96IP5_HUMAN
CHD4	B3KY63_HUMAN
CHD4	CHD4_HUMAN
CHD4	Q05CG6_HUMAN
CHD7	CHD7_HUMAN
CHD7	Q6ZWF9_HUMAN
CHEK1	CHK1_HUMAN
CHEK1	Q6W8P8_HUMAN
CHML	RAE2_HUMAN
CHMP2A	CHM2A_HUMAN
CHN1	B4DV19_HUMAN
CHN1	CHIN_HUMAN
CHN1	Q59EM3_HUMAN
CHN1	Q6IBE0_HUMAN
CHST5	CHST5_HUMAN
CIITA	C2TA_HUMAN
CIITA	Q29675_HUMAN
CIITA	Q29704_HUMAN
CIITA	Q66X48_HUMAN
CIITA	Q6LC19_HUMAN
CIITA	Q71VQ4_HUMAN
CIITA	Q8SNB7_HUMAN
CIITA	Q8SNB8_HUMAN
CIITA	Q96KL4_HUMAN
CITED1	CITE1_HUMAN
CIZ1	A8K9J8_HUMAN
CIZ1	B4E0A3_HUMAN
CIZ1	B4E131_HUMAN
CIZ1	CIZ1_HUMAN
CIZ1	Q5SYW2_HUMAN
CIZ1	Q5SYW3_HUMAN
CIZ1	Q5SYW4_HUMAN
CIZ1	Q5SYW5_HUMAN
CIZ1	Q5SYW9_HUMAN
CIZ1	Q5SYX4_HUMAN
CIZ1	Q8WU72_HUMAN
CIZ1	Q96KB7_HUMAN
CIZ1	Q9BTG3_HUMAN
CIZ1	Q9H868_HUMAN
CIZ1	Q9Y3F8_HUMAN
CKAP2	CKAP2_HUMAN
CKAP4	CKAP4_HUMAN
CKAP4	Q6NWZ1_HUMAN
CKAP4	Q8TB01_HUMAN
CKLF	C9JE38_HUMAN
CKLF	CKLF_HUMAN
CKLF	Q5BJH6_HUMAN
CKS1B	CKS1_HUMAN
CKS1B	Q5T178_HUMAN
CKS1B	Q9BZU3_HUMAN
CKS2	CKS2_HUMAN
CKS2	Q6FGI9_HUMAN
CKS2	Q6LET5_HUMAN
CLC	C5HZ13_HUMAN
CLC	LPPL_HUMAN
CLCN4	A1L3U1_HUMAN
CLCN4	CLCN4_HUMAN
CLCN4	Q4G0X3_HUMAN
CLCN4	Q75N13_HUMAN
CLDN1	A5JSJ9_HUMAN
CLDN1	CLD1_HUMAN
CLDN1	Q7Z4X9_HUMAN
CLDN15	CLD15_HUMAN
CLDN15	Q96FX9_HUMAN
CLDN4	CLD4_HUMAN
CLDN4	Q75L80_HUMAN
CLGN	CLGN_HUMAN
CLIC1	CLIC1_HUMAN
CLIC1	Q53FB0_HUMAN
CLIC1	Q5SRT3_HUMAN
CLK2	B1AVS9_HUMAN
CLK2	CLK2_HUMAN
CLK2	Q9BRG8_HUMAN
CLN3	CLN3_HUMAN
CLN3	Q2TA70_HUMAN
CLN3	Q549S9_HUMAN
CLN3	Q5XFT9_HUMAN
CLN3	Q9UBD8_HUMAN
CLN3	Q9UBH5_HUMAN
CLN3	Q9UP05_HUMAN
CLN3	Q9UP08_HUMAN
CLN3	Q9UP10_HUMAN
CLN5	CLN5_HUMAN
CLNS1A	ICLN_HUMAN
CLNS1A	Q9P1H0_HUMAN
CLPTM1	CLPT1_HUMAN
CLPTM1L	CLP1L_HUMAN
CLSTN1	B3KMD3_HUMAN
CLSTN1	CSTN1_HUMAN
CLSTN1	Q5SR54_HUMAN
CLTA	CLCA_HUMAN
CLTC	CLH1_HUMAN
CLTC	Q49AL0_HUMAN
CLU	CLUS_HUMAN
CLU	Q6LDQ3_HUMAN
CLU	Q8IWL5_HUMAN
CLU	Q8IWM0_HUMAN
CMPK1	B2R6S5_HUMAN
CMPK1	KCY_HUMAN
CNIH4	CNIH4_HUMAN
CNIH4	Q53HE6_HUMAN
CNOT3	CNOT3_HUMAN
CNOT3	Q6ZMJ6_HUMAN
CNPY2	CNPY2_HUMAN
CNTD1	CNTD1_HUMAN
COCH	COCH_HUMAN
COCH	Q6ZP09_HUMAN
COCH	Q96IU6_HUMAN
COG2	B1ALW7_HUMAN
COG2	COG2_HUMAN
COG2	Q86U99_HUMAN
COL12A1	COCA1_HUMAN
COL12A1	Q5TF09_HUMAN
COL12A1	Q86TG9_HUMAN
COL15A1	COFA1_HUMAN
COL18A1	COIA1_HUMAN
COL18A1	Q8NG19_HUMAN
COL1A1	CO1A1_HUMAN
COL1A1	Q14042_HUMAN
COL1A1	Q6LAN8_HUMAN
COL1A1	Q9UMA6_HUMAN
COL1A2	CO1A2_HUMAN
COL1A2	Q14036_HUMAN
COL1A2	Q75N18_HUMAN
COL1A2	Q7KZ71_HUMAN
COL2A1	CO2A1_HUMAN
COL2A1	Q16299_HUMAN
COL2A1	Q16561_HUMAN
COL2A1	Q5JPA6_HUMAN
COL3A1	CO3A1_HUMAN
COL3A1	Q6LBY7_HUMAN
COL4A1	CO4A1_HUMAN
COL4A1	Q14051_HUMAN
COL4A1	Q59F15_HUMAN
COL4A2	CO4A2_HUMAN
COL5A1	CO5A1_HUMAN
COL5A1	Q59EE7_HUMAN
COL5A1	Q96HC0_HUMAN
COL5A1	Q9UML4_HUMAN
COL5A2	CO5A2_HUMAN
COL5A2	Q5PR22_HUMAN
COL5A3	CO5A3_HUMAN
COL5A3	Q59GD4_HUMAN
COL6A3	A8MT30_HUMAN
COL6A3	B4E3U5_HUMAN
COL6A3	B7ZMJ7_HUMAN
COL6A3	B7ZW00_HUMAN
COL6A3	CO6A3_HUMAN
COL6A3	Q59F25_HUMAN
COL6A3	Q63HQ4_HUMAN
COL6A3	Q6MZG6_HUMAN
COL6A3	Q8N4Z1_HUMAN
COL7A1	CO7A1_HUMAN
COL7A1	Q59F16_HUMAN
COLEC12	COL12_HUMAN
COMMD1	COMD1_HUMAN
COMMD1	Q53EN2_HUMAN
COMMD1	Q53Q75_HUMAN
COMMD1	Q53QP8_HUMAN
COMMD1	Q53SJ8_HUMAN
COPA	COPA_HUMAN
COPB1	COPB_HUMAN
COPE	A6NE29_HUMAN
COPE	A6NKA3_HUMAN
COPE	COPE_HUMAN
COPE	Q53HJ6_HUMAN
COPE	Q7Z4Z1_HUMAN
COPE	Q9UGP6_HUMAN
COPS5	CSN5_HUMAN
COPS5	Q59GH5_HUMAN
COQ6	COQ6_HUMAN
COQ6	Q86U30_HUMAN
CORO1C	COR1C_HUMAN
CORO1C	Q53G58_HUMAN
CORO1C	Q59EA2_HUMAN
COX15	COX15_HUMAN
COX4I1	COX41_HUMAN
COX4I1	Q6P666_HUMAN
COX4I1	Q86WV2_HUMAN
COX6C	COX6C_HUMAN
CPD	CBPD_HUMAN
CPE	CBPE_HUMAN
CPLX1	CPLX1_HUMAN
CPLX2	CPLX2_HUMAN
CPNE1	B0QZ18_HUMAN
CPNE1	CPNE1_HUMAN
CPNE1	Q59EI4_HUMAN
CPNE1	Q5JX44_HUMAN
CPNE1	Q5JX45_HUMAN
CPNE1	Q5JX52_HUMAN
CPNE1	Q5JX53_HUMAN
CPNE1	Q5JX54_HUMAN
CPNE1	Q5JX55_HUMAN
CPNE1	Q5JX56_HUMAN
CPNE1	Q5JX57_HUMAN
CPNE1	Q5JX58_HUMAN
CPNE1	Q5JX59_HUMAN
CPNE1	Q5JX60_HUMAN
CPNE1	Q5JX61_HUMAN
CPNE1	Q5JX62_HUMAN
CPNE1	Q69YJ7_HUMAN
CPNE1	RBM12_HUMAN
CPNE3	CPNE3_HUMAN
CPNE3	Q05DL8_HUMAN
CPNE3	Q9P1I0_HUMAN
CPSF1	CPSF1_HUMAN
CPSF1	Q9C0J6_HUMAN
CPSF2	CPSF2_HUMAN
CR2	CR2_HUMAN
CR2	Q53EL2_HUMAN
CR2	Q5SR46_HUMAN
CR2	Q9H2B3_HUMAN
CREB3L2	CR3L2_HUMAN
CREB3L2	Q68D60_HUMAN
CREB3L2	Q70T20_HUMAN
CREB3L2	Q70T21_HUMAN
CREB3L2	Q86VD4_HUMAN
CRELD2	CREL2_HUMAN
CRELD2	Q659B4_HUMAN
CRHR1	CRFR1_HUMAN
CRHR1	Q8NFN9_HUMAN
CRHR1	Q8NG71_HUMAN
CRHR1	Q8WXR0_HUMAN
CRHR1	Q8WXR6_HUMAN
CRHR2	CRFR2_HUMAN
CRK	CRK_HUMAN
CRK	Q96GA9_HUMAN
CRKL	CRKL_HUMAN
CRTAC1	CRAC1_HUMAN
CRTAC1	Q5T4F6_HUMAN
CRTAP	CRTAP_HUMAN
CRTAP	Q8NB01_HUMAN
CRYAB	CRYAB_HUMAN
CRYZL1	Q8TBV9_HUMAN
CRYZL1	QORL1_HUMAN
CS	CISY_HUMAN
CS	Q0QEL2_HUMAN
CSDA	DBPA_HUMAN
CSDA	Q59EB5_HUMAN
CSDA	Q96GD7_HUMAN
CSE1L	XPO2_HUMAN
CSF2	CSF2_HUMAN
CSF2	Q647J8_HUMAN
CSNK2B	B0UXA9_HUMAN
CSNK2B	CSK2B_HUMAN
CSNK2B	LY65B_HUMAN
CSNK2B	Q5SQ63_HUMAN
CSNK2B	Q5SRQ2_HUMAN
CSNK2B	Q5SRQ6_HUMAN
CSNK2B	Q5SST4_HUMAN
CSPP1	CSPP1_HUMAN
CSPP1	Q9H688_HUMAN
CSRP2	CSRP2_HUMAN
CSTB	CYTB_HUMAN
CSTB	Q76LA1_HUMAN
CSTF1	CSTF1_HUMAN
CSTF1	Q5QPD8_HUMAN
CTAG1A	CTG1B_HUMAN
CTAG1B	CTG1B_HUMAN
CTBP2	CTBP2_HUMAN
CTBP2	Q1WIS0_HUMAN
CTBP2	Q5SQP8_HUMAN
CTBP2	Q8IY44_HUMAN
CTGF	CTGF_HUMAN
CTGF	Q5M8T4_HUMAN
CTGF	Q6FHL8_HUMAN
CTGF	Q9UDL6_HUMAN
CTHRC1	CTHR1_HUMAN
CTNNA1	CTNA1_HUMAN
CTNNA1	Q8N1C0_HUMAN
CTNNB1	CTNB1_HUMAN
CTNS	CTNS_HUMAN
CTNS	Q6FGP9_HUMAN
CTR9	CTR9_HUMAN
CTRL	CTRL_HUMAN
CTRL	Q53FV9_HUMAN
CTRL	Q8IUW0_HUMAN
CTRL	Q8NF36_HUMAN
CTSA	B4E324_HUMAN
CTSA	PPGB_HUMAN
CTSA	Q59EV6_HUMAN
CTSA	Q5JZG9_HUMAN
CTSA	Q5JZH0_HUMAN
CTSA	Q8TD81_HUMAN
CTSC	CATC_HUMAN
CTSC	Q2HIY8_HUMAN
CTSC	Q7Z3G7_HUMAN
CTSC	Q7Z5U7_HUMAN
CTSL1	CATL1_HUMAN
CTSL1	Q5K630_HUMAN
CTSL1	Q5T8F0_HUMAN
CTSL1	Q6LAF7_HUMAN
CTSL1	Q8NG13_HUMAN
CTSL1	Q9HBQ7_HUMAN
CTSS	CATS_HUMAN
CTTN	Q53HG7_HUMAN
CTTN	Q76MU0_HUMAN
CTTN	Q8N707_HUMAN
CTTN	Q96H99_HUMAN
CTTN	SRC8_HUMAN
CTTNBP2NL	CT2NL_HUMAN
CTTNBP2NL	Q9NPX3_HUMAN
CUL2	CUL2_HUMAN
CUL2	Q5T2B4_HUMAN
CUL2	Q5T2B5_HUMAN
CUL2	Q5T2B7_HUMAN
CUL4A	CUL4A_HUMAN
CUL7	CUL7_HUMAN
CUTA	CUTA_HUMAN
CWC27	SDC10_HUMAN
CX3CR1	CX3C1_HUMAN
CXADR	CXAR_HUMAN
CXCL10	CXL10_HUMAN
CXCL9	CXCL9_HUMAN
CXCR4	CXCR4_HUMAN
CXCR4	Q53S69_HUMAN
CXCR4	Q5MIL4_HUMAN
CXCR4	Q8NH28_HUMAN
CXCR4	Q9BXA0_HUMAN
CXCR6	A0N0N3_HUMAN
CXCR6	CXCR6_HUMAN
CYB561	B3KTA1_HUMAN
CYB561	CY561_HUMAN
CYC1	CY1_HUMAN
CYC1	Q8TBT6_HUMAN
CYP1B1	CP1B1_HUMAN
CYP1B1	Q2HZ43_HUMAN
CYP1B1	Q4U3K8_HUMAN
CYP1B1	Q53TK1_HUMAN
CYP1B1	Q5TZV6_HUMAN
CYP4F12	CP4FC_HUMAN
CYP4F12	Q5JPJ7_HUMAN
CYP4F12	Q8IV39_HUMAN
CYP51A1	CP51A_HUMAN
CYP51A1	Q05D40_HUMAN
CYP7A1	CP7A1_HUMAN
CYTH1	CYH1_HUMAN
DAB1	DAB1_HUMAN
DAB1	Q8NFD0_HUMAN
DAD1	DAD1_HUMAN
DAD1	Q53G02_HUMAN
DAG1	DAG1_HUMAN
DAND5	DAND5_HUMAN
DAP3	Q68CT7_HUMAN
DAP3	RT29_HUMAN
DARS2	Q9H9M6_HUMAN
DARS2	Q9NVT8_HUMAN
DARS2	SYDM_HUMAN
DAXX	B4E1C1_HUMAN
DAXX	DAXX_HUMAN
DAXX	Q4VX54_HUMAN
DAXX	Q53F85_HUMAN
DAXX	Q59FG7_HUMAN
DAXX	Q5STK9_HUMAN
DAXX	Q5STR5_HUMAN
DBF4	DBF4A_HUMAN
DBI	ACBP_HUMAN
DBI	B8ZWD2_HUMAN
DBN1	DREB_HUMAN
DBT	ODB2_HUMAN
DBT	Q5VVL7_HUMAN
DCAF7	DCAF7_HUMAN
DCC	DCC_HUMAN
DCC	Q16218_HUMAN
DCC	Q49AK4_HUMAN
DCDC2	DCDC2_HUMAN
DCDC2	Q5T3Y5_HUMAN
DCK	DCK_HUMAN
DCTN4	B3KWW0_HUMAN
DCTN4	DCTN4_HUMAN
DCTN4	Q9NSJ5_HUMAN
DCUN1D1	B2RB37_HUMAN
DCUN1D1	DCNL1_HUMAN
DCUN1D5	DCNL5_HUMAN
DDIT3	DDIT3_HUMAN
DDIT3	Q53YD1_HUMAN
DDIT4	DDT4_HUMAN
DDOST	OST48_HUMAN
DDR1	DDR1_HUMAN
DDR1	Q6ZNR9_HUMAN
DDR1	Q96T62_HUMAN
DDX11	DDX11_HUMAN
DDX11	Q2NKM7_HUMAN
DDX11	Q93000_HUMAN
DDX12	DDX12_HUMAN
DDX17	DDX17_HUMAN
DDX17	Q59F66_HUMAN
DDX17	Q9UQL5_HUMAN
DDX25	DDX25_HUMAN
DDX39	DDX39_HUMAN
DDX39	Q69YT6_HUMAN
DDX39	Q8N5M0_HUMAN
DDX3X	A8K538_HUMAN
DDX3X	DDX3X_HUMAN
DDX3X	Q59GX6_HUMAN
DDX3X	Q5S4N1_HUMAN
DDX43	DDX43_HUMAN
DDX46	DDX46_HUMAN
DDX46	Q0VGL8_HUMAN
DDX47	DDX47_HUMAN
DDX47	Q53GJ1_HUMAN
DDX47	Q7Z4B1_HUMAN
DDX47	Q9H4E3_HUMAN
DDX47	Q9UI98_HUMAN
DDX5	DDX5_HUMAN
DDX5	Q59E92_HUMAN
DDX5	Q7Z2V5_HUMAN
DDX56	DDX56_HUMAN
DDX56	Q53HB9_HUMAN
DDX58	DDX58_HUMAN
DDX58	Q3B797_HUMAN
DDX6	DDX6_HUMAN
DDX6	Q8IV96_HUMAN
DEFB1	DEFB1_HUMAN
DEFB1	Q86SQ8_HUMAN
DEGS1	DEGS1_HUMAN
DEK	B4DN37_HUMAN
DEK	DEK_HUMAN
DEK	Q6MZJ9_HUMAN
DENND4A	MYCPP_HUMAN
DENND4A	Q05C90_HUMAN
DEPDC1	DEP1A_HUMAN
DEPDC1	Q69YG3_HUMAN
DEPDC1	Q9NXA5_HUMAN
DEPDC1B	B4DUT4_HUMAN
DEPDC1B	DEP1B_HUMAN
DERL2	DERL2_HUMAN
DES	DESM_HUMAN
DES	Q2PUK1_HUMAN
DES	Q45VM6_HUMAN
DES	Q45VM7_HUMAN
DES	Q45VM8_HUMAN
DES	Q53SB5_HUMAN
DES	Q549R7_HUMAN
DES	Q549R8_HUMAN
DES	Q549R9_HUMAN
DES	Q5RLN0_HUMAN
DES	Q5RLN1_HUMAN
DES	Q5RLN2_HUMAN
DES	Q9GZR6_HUMAN
DES	Q9H319_HUMAN
DEXI	DEXI_HUMAN
DFNA5	A4FVA8_HUMAN
DFNA5	B3KT05_HUMAN
DFNA5	DFNA5_HUMAN
DGAT1	DGAT1_HUMAN
DGAT1	Q9BRH5_HUMAN
DGCR2	IDD_HUMAN
DGCR2	Q5CZ70_HUMAN
DGCR2	Q8IWC8_HUMAN
DGKZ	A8MVN1_HUMAN
DGKZ	DGKZ_HUMAN
DGKZ	Q59F26_HUMAN
DGKZ	Q6MZE6_HUMAN
DGKZ	Q6ZT25_HUMAN
DGKZ	Q6ZVG7_HUMAN
DGKZ	Q6ZWA5_HUMAN
DGKZ	Q7Z5X8_HUMAN
DGKZ	Q8IVW9_HUMAN
DGUOK	DGUOK_HUMAN
DGUOK	P78533_HUMAN
DGUOK	Q4ZG09_HUMAN
DGUOK	Q7L1W9_HUMAN
DGUOK	Q9BVK7_HUMAN
DHFR	B0YJ76_HUMAN
DHFR	DYR_HUMAN
DHX36	DHX36_HUMAN
DHX9	DHX9_HUMAN
DHX9	Q05CI5_HUMAN
DHX9	Q12803_HUMAN
DHX9	Q32Q22_HUMAN
DHX9	Q58F26_HUMAN
DHX9	Q6PJK6_HUMAN
DIABLO	DBLOH_HUMAN
DIABLO	Q502X2_HUMAN
DIABLO	Q53HB7_HUMAN
DIABLO	Q6W3F3_HUMAN
DIDO1	DIDO1_HUMAN
DIMT1L	DIMT1_HUMAN
DKK1	DKK1_HUMAN
DLD	DLDH_HUMAN
DLG2	DLG2_HUMAN
DLG2	Q5H9Q4_HUMAN
DLG2	Q6ZSU2_HUMAN
DLG2	Q6ZV01_HUMAN
DLG2	Q6ZV02_HUMAN
DLG5	DLG5_HUMAN
DLGAP5	A8MTM6_HUMAN
DLGAP5	B4DRM8_HUMAN
DLGAP5	DLGP5_HUMAN
DLGAP5	Q86T11_HUMAN
DLK1	DLK1_HUMAN
DLK1	Q0H2C6_HUMAN
DLK1	Q45KX0_HUMAN
DLK1	Q4U3E1_HUMAN
DLK1	Q969Y6_HUMAN
DNAJA1	DNJA1_HUMAN
DNAJA1	Q5T7Q0_HUMAN
DNAJA1	Q86TL9_HUMAN
DNAJA1	Q9NXZ8_HUMAN
DNAJA3	B3KM81_HUMAN
DNAJA3	DNJA3_HUMAN
DNAJA3	Q53G26_HUMAN
DNAJA3	Q59E88_HUMAN
DNAJB9	DNJB9_HUMAN
DNAJB9	Q6FIF1_HUMAN
DNAJC10	DJC10_HUMAN
DNAJC10	Q3B7W8_HUMAN
DNAJC10	Q6YPB0_HUMAN
DNAJC10	Q71S60_HUMAN
DNAJC10	Q86XS7_HUMAN
DNAJC10	Q8N4C5_HUMAN
DNAJC13	DJC13_HUMAN
DNAJC13	Q0D2M7_HUMAN
DNAJC13	Q8N7A5_HUMAN
DNAJC9	B2RMW6_HUMAN
DNAJC9	DNJC9_HUMAN
DNM1L	DNM1L_HUMAN
DNM1L	Q32Q67_HUMAN
DNM1L	Q59GN9_HUMAN
DNMT1	DNMT1_HUMAN
DNMT1	Q59FP7_HUMAN
DNMT3A	DNM3A_HUMAN
DNMT3A	Q59HC6_HUMAN
DNMT3A	Q6PJ37_HUMAN
DNMT3A	Q86TE8_HUMAN
DNMT3A	Q8WVA9_HUMAN
DNMT3B	DNM3B_HUMAN
DNMT3B	Q2PJS8_HUMAN
DNMT3B	Q59H79_HUMAN
DNTTIP2	TDIF2_HUMAN
DOCK6	DOCK6_HUMAN
DOCK9	A6H8Z6_HUMAN
DOCK9	B3KX25_HUMAN
DOCK9	B3KXE2_HUMAN
DOCK9	DOCK9_HUMAN
DOCK9	Q5JUD2_HUMAN
DOCK9	Q5JUD3_HUMAN
DOCK9	Q5JUD7_HUMAN
DOCK9	Q5JUD8_HUMAN
DOCK9	Q68CY0_HUMAN
DOCK9	Q6ZSL5_HUMAN
DOCK9	Q7Z6H4_HUMAN
DOK4	DOK4_HUMAN
DONSON	DONS_HUMAN
DPAGT1	GPT_HUMAN
DPH1	B3KQW7_HUMAN
DPH1	DPH1_HUMAN
DPH2	A8MVC9_HUMAN
DPH2	DPH2_HUMAN
DPM1	DPM1_HUMAN
DPM1	Q96HK0_HUMAN
DPM2	DPM2_HUMAN
DPM2	Q5XKK9_HUMAN
DPM2	Q96BP5_HUMAN
DPP4	DPP4_HUMAN
DPP4	Q53TN1_HUMAN
DPYS	DPYS_HUMAN
DR1	NC2B_HUMAN
DR1	Q53F47_HUMAN
DR1	Q658N3_HUMAN
DSC3	DSC3_HUMAN
DSC3	Q9HAX1_HUMAN
DSP	DESP_HUMAN
DSP	Q4LE79_HUMAN
DSP	Q6ZP16_HUMAN
DSTN	B4DYA6_HUMAN
DSTN	DEST_HUMAN
DTL	DTL_HUMAN
DTNA	A8K541_HUMAN
DTNA	DTNA_HUMAN
DTNA	Q59GK7_HUMAN
DTNA	Q9BS59_HUMAN
DTNB	DTNB_HUMAN
DTNB	Q1I0L3_HUMAN
DTNB	Q53QV1_HUMAN
DTNB	Q53SF9_HUMAN
DTNB	Q53T51_HUMAN
DTNB	Q53TC8_HUMAN
DTNB	Q86VR4_HUMAN
DTNB	Q96AW0_HUMAN
DUS4L	A4D0R5_HUMAN
DUS4L	DUS4L_HUMAN
DUSP12	DUS12_HUMAN
DUT	DUT_HUMAN
DVL2	DVL2_HUMAN
DVL3	DVL3_HUMAN
DVL3	Q13518_HUMAN
DVL3	Q8WVA8_HUMAN
DVL3	Q9UG07_HUMAN
DYNC1H1	DYHC1_HUMAN
DYNC1H1	Q6P2H7_HUMAN
DYNC1H1	Q92862_HUMAN
DYNC1H1	Q9NRC3_HUMAN
DYNLL1	DYL1_HUMAN
DYNLL1	Q6FGH9_HUMAN
DYNLRB1	DLRB1_HUMAN
DYRK2	DYRK2_HUMAN
E2F1	E2F1_HUMAN
E2F1	Q9BSD8_HUMAN
E2F2	E2F2_HUMAN
E2F2	Q5U0J0_HUMAN
E2F2	Q96ID7_HUMAN
E2F3	E2F3_HUMAN
E2F3	Q24JQ3_HUMAN
E2F3	Q499G5_HUMAN
E2F3	Q68DT0_HUMAN
E2F3	Q96AR0_HUMAN
E2F5	E2F5_HUMAN
E2F5	Q59GC4_HUMAN
E2F8	E2F8_HUMAN
E4F1	E4F1_HUMAN
E4F1	Q59GV1_HUMAN
E4F1	Q9BV18_HUMAN
EBAG9	Q5Y8C7_HUMAN
EBAG9	Q6R3F1_HUMAN
EBAG9	RCAS1_HUMAN
EBP	EBP_HUMAN
ECE1	ECE1_HUMAN
ECE1	Q2Z2K8_HUMAN
ECEL1	ECEL1_HUMAN
ECEL1	Q86SN0_HUMAN
ECT2	ECT2_HUMAN
ECT2	Q0MT80_HUMAN
ECT2	Q6U836_HUMAN
ECT2	Q96J05_HUMAN
ECT2	Q96SJ9_HUMAN
EDC4	EDC4_HUMAN
EDN1	EDN1_HUMAN
EDN1	Q6FH53_HUMAN
EED	EED_HUMAN
EEF1A1	EF1A1_HUMAN
EEF1A1	EF1A3_HUMAN
EEF1A1	Q14222_HUMAN
EEF1A1	Q16577_HUMAN
EEF1A1	Q2F837_HUMAN
EEF1A1	Q504Z0_HUMAN
EEF1A1	Q53G85_HUMAN
EEF1A1	Q53G89_HUMAN
EEF1A1	Q53GA1_HUMAN
EEF1A1	Q53GE9_HUMAN
EEF1A1	Q53HM9_HUMAN
EEF1A1	Q53HQ7_HUMAN
EEF1A1	Q53HR1_HUMAN
EEF1A1	Q53HR5_HUMAN
EEF1A1	Q5JR01_HUMAN
EEF1A1	Q6IPN6_HUMAN
EEF1A1	Q6IPS9_HUMAN
EEF1A1	Q6IPT9_HUMAN
EEF1A1	Q6IQ15_HUMAN
EEF1A1	Q6NS35_HUMAN
EEF1A1	Q6NSH7_HUMAN
EEF1A1	Q6P082_HUMAN
EEF1A1	Q6P4C9_HUMAN
EEF1A1	Q8IUB0_HUMAN
EEF1A1	Q8TBL1_HUMAN
EEF1A1	Q96C29_HUMAN
EEF1A1	Q96CD8_HUMAN
EEF1A1	Q96EB3_HUMAN
EEF1A1	Q96RE1_HUMAN
EEF1A1	Q9H2I7_HUMAN
EEF1A1	Q9NZS6_HUMAN
EEF1D	B2RAR6_HUMAN
EEF1D	EF1D_HUMAN
EEF1D	Q4VBZ6_HUMAN
EEF1D	Q9BW34_HUMAN
EEF1D	Q9H7G6_HUMAN
EEF1G	EF1G_HUMAN
EEF1G	Q2F838_HUMAN
EEF1G	Q2F840_HUMAN
[truncated: 9,563 more rows]

## Sheet: HCC downregulation genes
Gene_Symbol	Protein_UniprotID
A1BG	A1BG_HUMAN
A1BG	Q7Z3U3_HUMAN
A2BP1	FOX1A_HUMAN
A2BP1	Q59HD3_HUMAN
A2BP1	Q8TCM0_HUMAN
A2M	A2MG_HUMAN
A2M	Q9BQ22_HUMAN
AADAC	AAAD_HUMAN
AADAT	AADAT_HUMAN
AADAT	Q4W5N8_HUMAN
AASS	A4D0W4_HUMAN
AASS	AASS_HUMAN
ABAT	GABT_HUMAN
ABAT	Q9HBH6_HUMAN
ABCA1	ABCA1_HUMAN
ABCA1	Q59HC0_HUMAN
ABCA1	Q9H002_HUMAN
ABCA1	Q9NP93_HUMAN
ABCA1	Q9NS76_HUMAN
ABCA4	ABCA4_HUMAN
ABCA4	Q0QD48_HUMAN
ABCA4	Q6AI28_HUMAN
ABCA4	Q86V62_HUMAN
ABCA6	ABCA6_HUMAN
ABCA8	ABCA8_HUMAN
ABCA8	Q49AI9_HUMAN
ABCB1	A4D1D2_HUMAN
ABCB1	MDR1_HUMAN
ABCB1	Q59GY9_HUMAN
ABCB1	Q6TBL4_HUMAN
ABCB11	ABCBB_HUMAN
ABCB11	Q53S60_HUMAN
ABCB11	Q9UIL3_HUMAN
ABCB4	A4D1D5_HUMAN
ABCB4	MDR3_HUMAN
ABCB4	Q4G0Q4_HUMAN
ABCB4	Q6PJ81_HUMAN
ABCB4	Q75MQ5_HUMAN
ABCC2	MRP2_HUMAN
ABCC2	Q5TCZ5_HUMAN
ABCC2	Q9UN90_HUMAN
ABCC3	MRP3_HUMAN
ABCC3	Q2M3C9_HUMAN
ABCC3	Q59H05_HUMAN
ABCC3	Q86VN9_HUMAN
ABCC3	Q86X85_HUMAN
ABCC3	Q96QA9_HUMAN
ABCC9	A6NFG0_HUMAN
ABCC9	ABCC9_HUMAN
ABCC9	Q8N4N7_HUMAN
ABCC9	Q8N9N1_HUMAN
ABCD3	ABCD3_HUMAN
ABCG2	ABCG2_HUMAN
ABCG2	Q4W5I3_HUMAN
ABCG2	Q8WZ76_HUMAN
ABHD1	ABHD1_HUMAN
ABHD14B	ABHEB_HUMAN
ABHD2	ABHD2_HUMAN
ABHD5	ABHD5_HUMAN
ABHD6	ABHD6_HUMAN
ABHD6	Q9HBL9_HUMAN
ABI3	ABI3_HUMAN
ABI3BP	Q5JPC9_HUMAN
ABI3BP	Q9H717_HUMAN
ABI3BP	TARSH_HUMAN
ABLIM3	ABLM3_HUMAN
ABP1	ABP1_HUMAN
ABP1	Q9HBM7_HUMAN
ACAA1	Q8NCW8_HUMAN
ACAA1	Q96CA6_HUMAN
ACAA1	THIK_HUMAN
ACAA2	B3KNP8_HUMAN
ACAA2	THIM_HUMAN
ACACB	ACACB_HUMAN
ACACB	Q4G170_HUMAN
ACACB	Q59GJ9_HUMAN
ACAD11	ACD11_HUMAN
ACAD11	NPHP3_HUMAN
ACAD11	Q08AE9_HUMAN
ACAD11	Q7Z491_HUMAN
ACAD11	Q8NAA7_HUMAN
ACADL	ACADL_HUMAN
ACADM	ACADM_HUMAN
ACADM	Q5HYG7_HUMAN
ACADM	Q5T4U5_HUMAN
ACADS	ACADS_HUMAN
ACADSB	ACDSB_HUMAN
ACADSB	Q5SQN6_HUMAN
ACADVL	ACADV_HUMAN
ACADVL	Q53HR2_HUMAN
ACAT1	Q96FG8_HUMAN
ACAT1	THIL_HUMAN
ACAT2	Q59GW6_HUMAN
ACAT2	THIC_HUMAN
ACCS	1A1L1_HUMAN
ACE2	ACE2_HUMAN
ACE2	C7ECU1_HUMAN
ACMSD	ACMSD_HUMAN
ACMSD	Q53SR5_HUMAN
ACMSD	Q6ZV40_HUMAN
ACO1	ACOC_HUMAN
ACO1	Q59FI0_HUMAN
ACO1	Q5VZA6_HUMAN
ACO1	Q5VZA7_HUMAN
ACO1	Q9HBB2_HUMAN
ACO2	ACON_HUMAN
ACO2	Q71UF1_HUMAN
ACOT12	ACO12_HUMAN
ACOT12	Q5FWE9_HUMAN
ACOT2	ACOT2_HUMAN
ACOX1	ACOX1_HUMAN
ACOX1	Q7Z3W5_HUMAN
ACOX2	ACOX2_HUMAN
ACP5	PPA5_HUMAN
ACSL1	ACSL1_HUMAN
ACSL1	Q108N1_HUMAN
ACSL1	Q108N2_HUMAN
ACSL5	ACSL5_HUMAN
ACSM2A	ACS2A_HUMAN
ACSM2A	B3KP75_HUMAN
ACSM3	ACSM3_HUMAN
ACTB	ACTB_HUMAN
ACTB	Q1KLZ0_HUMAN
ACTB	Q53G76_HUMAN
ACTB	Q53G99_HUMAN
ACTB	Q53GK6_HUMAN
ACTB	Q562L3_HUMAN
ACTB	Q562S0_HUMAN
ACTB	Q9UE89_HUMAN
ACTB	Q9UMN3_HUMAN
ACTN4	ACTN4_HUMAN
ACTN4	Q96BG6_HUMAN
ACTR1A	ACTZ_HUMAN
ACTR2	ARP2_HUMAN
ACTR2	Q8IY98_HUMAN
ACY1	ACY1_HUMAN
ACY3	ACY3_HUMAN
ACY3	Q8TDM2_HUMAN
ACYP2	ACYP2_HUMAN
ACYP2	Q4ZFV7_HUMAN
ACYP2	Q53TK7_HUMAN
ADAM10	ADA10_HUMAN
ADAM12	A8K6G4_HUMAN
ADAM12	ADA12_HUMAN
ADAM12	Q5JRP2_HUMAN
ADAM17	ADA17_HUMAN
ADAM17	B2RNB2_HUMAN
ADAM17	Q53RF5_HUMAN
ADAM17	Q53RS1_HUMAN
ADAM17	Q53S40_HUMAN
ADAM17	Q6P5T8_HUMAN
ADAM9	ADAM9_HUMAN
ADAMTS1	ATS1_HUMAN
ADAMTS1	Q5HYL0_HUMAN
ADAMTS1	Q6ZP79_HUMAN
ADAMTS1	Q8NE26_HUMAN
ADAMTS13	ATS13_HUMAN
ADAMTS13	B3KWF7_HUMAN
ADAMTS13	Q6QNA4_HUMAN
ADAMTS13	Q6QNA5_HUMAN
ADAMTS13	Q6QNA6_HUMAN
ADAMTS13	Q6QNA7_HUMAN
ADAMTS13	Q9UGQ1_HUMAN
ADAMTS17	ATS17_HUMAN
ADAMTS17	Q2I7G4_HUMAN
ADAMTS17	Q6ZN75_HUMAN
ADAMTS2	ATS2_HUMAN
ADAMTS4	ATS4_HUMAN
ADAMTS4	Q2HYD0_HUMAN
ADAMTSL3	ATL3_HUMAN
ADCY1	ADCY1_HUMAN
ADCY1	Q59FG4_HUMAN
ADCY1	Q8NFM5_HUMAN
ADH1A	ADH1A_HUMAN
ADH1A	ADH1B_HUMAN
ADH1A	ADH1G_HUMAN
ADH1A	Q71V49_HUMAN
ADH1B	ADH1A_HUMAN
ADH1B	ADH1B_HUMAN
ADH1B	ADH1G_HUMAN
ADH1B	Q71V49_HUMAN
ADH1C	ADH1A_HUMAN
ADH1C	ADH1B_HUMAN
ADH1C	ADH1G_HUMAN
ADH1C	Q71V49_HUMAN
ADH4	ADH4_HUMAN
ADH5	ADHX_HUMAN
ADH5	Q2VIM7_HUMAN
ADH5	Q5U043_HUMAN
ADH5	Q6FI45_HUMAN
ADH5	Q6IRT1_HUMAN
ADH6	ADH6_HUMAN
ADH6	Q8IUN7_HUMAN
ADH6	Q9H1A0_HUMAN
ADI1	MTND_HUMAN
ADIPOR1	ADR1_HUMAN
ADIPOR2	ADR2_HUMAN
ADK	ADK_HUMAN
ADK	Q5JQ10_HUMAN
ADK	Q86U79_HUMAN
ADK	Q9HB33_HUMAN
ADM	ADML_HUMAN
ADNP	ADNP_HUMAN
ADNP	Q6DHZ8_HUMAN
ADORA1	AA1R_HUMAN
ADORA2A	AA2AR_HUMAN
ADORA2A	B3KVQ4_HUMAN
ADORA2A	Q93003_HUMAN
ADORA3	AA3R_HUMAN
ADORA3	Q5QNY7_HUMAN
ADORA3	Q5QNZ3_HUMAN
ADORA3	Q5QNZ4_HUMAN
ADORA3	Q6LD47_HUMAN
ADORA3	Q6P2N6_HUMAN
ADORA3	Q9HBK8_HUMAN
ADRA1A	ADA1A_HUMAN
ADRA1A	B0ZBD3_HUMAN
ADRA1A	Q6LD06_HUMAN
ADRA1A	Q7KYZ9_HUMAN
ADRB2	ADRB2_HUMAN
ADRB2	Q9BYZ0_HUMAN
ADRBK2	ARBK2_HUMAN
ADRBK2	Q8N433_HUMAN
ADSSL1	B3KTV4_HUMAN
ADSSL1	PURA1_HUMAN
AEBP1	AEBP1_HUMAN
AFAP1L2	AF1L2_HUMAN
AFF4	AFF4_HUMAN
AFF4	Q7Z2T0_HUMAN
AFF4	Q8TAX5_HUMAN
AFM	AFAM_HUMAN
AFM	Q4W5C5_HUMAN
AFMID	AFMID_HUMAN
AGL	GDE_HUMAN
AGPAT4	PLCD_HUMAN
AGPAT4	Q6AI25_HUMAN
AGPAT4	Q6PJN9_HUMAN
AGTR1	AGTR1_HUMAN
AGTR1	Q53YY0_HUMAN
AGTR1	Q6NUP5_HUMAN
AGTR1	Q8TBK4_HUMAN
AGXT	Q9BXA1_HUMAN
AGXT	Q9UJX1_HUMAN
AGXT	SPYA_HUMAN
AGXT2	AGT2_HUMAN
AGXT2L1	AT2L1_HUMAN
AGXT2L1	B7Z1Y0_HUMAN
AGXT2L2	A8K7P6_HUMAN
AGXT2L2	AT2L2_HUMAN
AHCY	B3KUN3_HUMAN
AHCY	Q1RMG2_HUMAN
AHCY	SAHH_HUMAN
AHNAK	A1A586_HUMAN
AHNAK	AHNK_HUMAN
AHNAK	Q13727_HUMAN
AHNAK	Q6ZQN2_HUMAN
AHNAK	Q8N274_HUMAN
AHNAK	Q96EC4_HUMAN
AHNAK	Q9BVU3_HUMAN
AHR	AHR_HUMAN
AHSG	FETUA_HUMAN
AIFM1	AIFM1_HUMAN
AIFM1	Q1L6K4_HUMAN
AIFM1	Q1L6K6_HUMAN
AIFM1	Q2QKE4_HUMAN
AIFM1	Q5RZ99_HUMAN
AIFM1	Q5RZA0_HUMAN
AIFM1	TXD12_HUMAN
AIG1	AIG1_HUMAN
AIG1	Q53HV5_HUMAN
AIG1	Q5T2H0_HUMAN
AIG1	Q5T2H3_HUMAN
AIG1	Q5T2H4_HUMAN
AIG1	Q5THU2_HUMAN
AIP	AIP_HUMAN
AKAP12	A6NEC7_HUMAN
AKAP12	AKA12_HUMAN
AKAP12	Q5CZB5_HUMAN
AKAP12	Q6NSG9_HUMAN
AKAP12	Q86TJ9_HUMAN
AKAP2	AKAP2_HUMAN
AKAP2	B4E2K2_HUMAN
AKAP2	PALM2_HUMAN
AKAP9	AKAP9_HUMAN
AKAP9	Q5GIA7_HUMAN
AKAP9	Q5IBP5_HUMAN
AKAP9	Q6PJH3_HUMAN
AKAP9	Q8IW64_HUMAN
AKAP9	Q96KG3_HUMAN
AKAP9	Q9UFL2_HUMAN
AKR1A1	AK1A1_HUMAN
AKR1A1	Q5T621_HUMAN
AKR1C4	AK1C4_HUMAN
AKR1C4	Q96SD9_HUMAN
AKR1D1	AK1D1_HUMAN
AKR1D1	Q96LK9_HUMAN
AKR7A2	ARK72_HUMAN
AKT1	AKT1_HUMAN
AKT1	B0LPE5_HUMAN
AKT1	B3KVH4_HUMAN
AKT1	Q9BV07_HUMAN
AKTIP	AKTIP_HUMAN
AKTIP	Q659E0_HUMAN
ALAD	HEM2_HUMAN
ALAD	Q6ZMU0_HUMAN
ALAS1	HEM1_HUMAN
ALAS1	Q5JAM2_HUMAN
ALB	ALBU_HUMAN
ALB	Q16167_HUMAN
ALB	Q56G89_HUMAN
ALB	Q8IUK7_HUMAN
ALDH1A1	AL1A1_HUMAN
ALDH1A1	Q59EJ0_HUMAN
ALDH1A1	Q5SYQ7_HUMAN
ALDH1A1	Q5SYQ8_HUMAN
ALDH1A1	Q5SYQ9_HUMAN
ALDH1B1	AL1B1_HUMAN
ALDH1L1	FTHFD_HUMAN
ALDH1L1	Q53H87_HUMAN
ALDH1L1	Q53HP5_HUMAN
ALDH1L1	Q59G10_HUMAN
ALDH1L1	Q6ZV71_HUMAN
ALDH1L1	Q8TBP8_HUMAN
ALDH1L1	Q9UFA9_HUMAN
ALDH2	ALDH2_HUMAN
ALDH2	Q53FB6_HUMAN
ALDH2	Q9UN17_HUMAN
ALDH3A2	AL3A2_HUMAN
ALDH3A2	Q59H65_HUMAN
ALDH3A2	Q68D64_HUMAN
ALDH3A2	Q6I9T3_HUMAN
ALDH4A1	AL4A1_HUMAN
ALDH4A1	B4DGE4_HUMAN
ALDH4A1	Q5TF55_HUMAN
ALDH6A1	MMSA_HUMAN
ALDH6A1	Q53FN8_HUMAN
ALDH6A1	Q53H94_HUMAN
ALDH7A1	AL7A1_HUMAN
ALDH8A1	AL8A1_HUMAN
ALDOB	ALDOB_HUMAN
ALDOB	Q8NHT3_HUMAN
ALDOC	ALDOC_HUMAN
ALK	ALK_HUMAN
ALK	Q580I3_HUMAN
ALKBH1	ALKB1_HUMAN
ALKBH1	Q5XKL0_HUMAN
ALMS1	ALMS1_HUMAN
ALOX15	LOX15_HUMAN
ALOX15	Q12938_HUMAN
ALPI	PPBI_HUMAN
ALPL	PPBT_HUMAN
ALPL	Q9UIL5_HUMAN
ALPP	PPB1_HUMAN
AMACR	AMACR_HUMAN
AMACR	C1QT3_HUMAN
AMACR	Q0VAN4_HUMAN
AMACR	Q3KT79_HUMAN
AMACR	Q53GV0_HUMAN
AMACR	Q542Y2_HUMAN
AMACR	Q59G48_HUMAN
AMACR	Q6VRU3_HUMAN
AMACR	Q6VRU4_HUMAN
AMBP	AMBP_HUMAN
AMBP	P78492_HUMAN
AMDHD1	B3KVC5_HUMAN
AMDHD1	HUTI_HUMAN
AMFR	AMFR1_HUMAN
AMFR	AMFR2_HUMAN
AMFR	Q1RN03_HUMAN
AMFR	Q6PGR1_HUMAN
AMN	AMNLS_HUMAN
AMOTL1	AMOL1_HUMAN
AMOTL1	Q8N209_HUMAN
AMOTL1	Q8TEN8_HUMAN
AMPD2	AMPD2_HUMAN
AMPD2	Q5T694_HUMAN
ANAPC10	APC10_HUMAN
ANAPC10	Q4W5I2_HUMAN
ANG	ANGI_HUMAN
ANG	Q05CV1_HUMAN
ANG	Q53X86_HUMAN
ANG	Q6P5T2_HUMAN
ANGPTL1	ANGL1_HUMAN
ANGPTL1	Q53F22_HUMAN
ANGPTL3	ANGL3_HUMAN
ANGPTL3	B1ALJ0_HUMAN
ANGPTL4	A8MY84_HUMAN
ANGPTL4	ANGL4_HUMAN
ANGPTL6	ANGL6_HUMAN
ANK3	ANK3_HUMAN
ANK3	B1AQT2_HUMAN
ANK3	Q13484_HUMAN
ANK3	Q59G01_HUMAN
ANK3	Q5CZH9_HUMAN
ANK3	Q6ZT73_HUMAN
ANK3	Q7Z3G4_HUMAN
ANK3	Q8NAK2_HUMAN
ANK3	Q9H0P5_HUMAN
ANKH	ANKH_HUMAN
ANKH	Q53HE9_HUMAN
ANKRD10	ANR10_HUMAN
ANKRD10	Q8IUW1_HUMAN
ANKRD10	Q9H6D6_HUMAN
ANKRD10	Q9NXQ9_HUMAN
ANKRD37	ANR37_HUMAN
ANKRD53	ANR53_HUMAN
ANKRD55	ANR55_HUMAN
ANKRD55	B3KVT8_HUMAN
ANTXR2	ANTR2_HUMAN
ANTXR2	Q32Q26_HUMAN
ANTXR2	Q4W5H6_HUMAN
ANXA1	ANXA1_HUMAN
ANXA1	Q05BR2_HUMAN
ANXA1	Q5T3N0_HUMAN
ANXA1	Q5T3N1_HUMAN
ANXA1	Q5TZZ9_HUMAN
ANXA10	ANX10_HUMAN
ANXA10	Q6ITU8_HUMAN
ANXA3	ANXA3_HUMAN
ANXA3	Q59EE3_HUMAN
ANXA4	ANXA4_HUMAN
ANXA4	Q59FK3_HUMAN
ANXA4	Q6LES2_HUMAN
ANXA4	Q6MZI0_HUMAN
ANXA4	Q6P452_HUMAN
ANXA7	ANXA7_HUMAN
ANXA7	B2R657_HUMAN
ANXA7	Q53HM8_HUMAN
AOC3	AOC3_HUMAN
AOC3	Q9UEU7_HUMAN
AOX1	ADO_HUMAN
AOX1	Q9BYF0_HUMAN
AP2A2	AP2A2_HUMAN
AP2A2	Q59FN8_HUMAN
AP2A2	Q8N2F8_HUMAN
AP2A2	Q9UFK5_HUMAN
APBB1IP	AB1IP_HUMAN
APBB1IP	Q8IYL7_HUMAN
APBB1IP	Q9NWJ6_HUMAN
APC	APC_HUMAN
APC	Q16097_HUMAN
APC	Q4LE70_HUMAN
APC	Q5EBR9_HUMAN
APC	Q5EEK4_HUMAN
APC	Q6B4H6_HUMAN
APC	Q7Z2Q8_HUMAN
APC	Q9HAW6_HUMAN
APC	Q9P119_HUMAN
APC	Q9UM98_HUMAN
APCS	SAMP_HUMAN
API5	API5_HUMAN
API5	B4DGR0_HUMAN
API5	B4DRJ2_HUMAN
APOA1	APOA1_HUMAN
APOA1	Q6LEJ8_HUMAN
APOA1	Q8TDB0_HUMAN
APOA1	Q9Y355_HUMAN
APOA4	APOA4_HUMAN
APOA4	Q13784_HUMAN
APOA5	APOA5_HUMAN
APOB	APOB_HUMAN
APOB	P78482_HUMAN
APOB	Q13789_HUMAN
APOB	Q13828_HUMAN
APOB	Q4ZG63_HUMAN
APOB	Q53QC8_HUMAN
APOB	Q59HB3_HUMAN
APOB	Q7Z7Q0_HUMAN
APOB	Q9UE51_HUMAN
APOB	Q9UE52_HUMAN
APOB	Q9UE53_HUMAN
APOBEC3G	ABC3G_HUMAN
APOBEC3G	Q05JX5_HUMAN
APOBEC3G	Q6ICH3_HUMAN
APOC1	APOC1_HUMAN
APOC1	B2R526_HUMAN
APOC3	A3KPE2_HUMAN
APOC3	APOC3_HUMAN
APOC4	APOC4_HUMAN
APOE	APOE_HUMAN
APOE	Q13791_HUMAN
APOE	Q6LA97_HUMAN
APOE	Q6LBZ1_HUMAN
APOE	Q8TCZ8_HUMAN
APOF	APOF_HUMAN
APOH	APOH_HUMAN
APOM	APOM_HUMAN
APOM	Q5SRP4_HUMAN
APP	A4_HUMAN
APP	B4DGD0_HUMAN
APP	Q9BYY9_HUMAN
AQP1	AQP1_HUMAN
AQP1	Q6JSD7_HUMAN
AQP1	Q6JSD8_HUMAN
AQP3	AQP3_HUMAN
AQP3	Q6FGT2_HUMAN
AQP4	AQP4_HUMAN
AQP4	Q53H97_HUMAN
AQP4	Q59GF3_HUMAN
AQP4	Q6L7A0_HUMAN
AQP4	Q9H3V7_HUMAN
AQP6	AQP6_HUMAN
AQP6	Q9NSV5_HUMAN
AQP7	AQP7_HUMAN
AQP7	Q08E94_HUMAN
AQP7	Q5T5L3_HUMAN
AQP7	Q5T5L4_HUMAN
AQP7	Q5T5L5_HUMAN
AQP7	Q5T5M1_HUMAN
AQP7	Q6P5T0_HUMAN
AQP9	AQP9_HUMAN
AQP9	Q6FGT0_HUMAN
AR	ANDR_HUMAN
AR	Q13771_HUMAN
AR	Q9BZG5_HUMAN
AR	Q9BZG6_HUMAN
AR	Q9BZG7_HUMAN
AR	Q9NUA2_HUMAN
AR	Q9UN21_HUMAN
AREG	AREG_HUMAN
AREG	Q5U026_HUMAN
ARF6	ARF6_HUMAN
ARF6	Q5U025_HUMAN
ARF6	Q6FGZ2_HUMAN
ARF6	Q6FH17_HUMAN
ARG1	ARGI1_HUMAN
ARHGAP1	RHG01_HUMAN
ARHGAP20	RHG20_HUMAN
ARHGAP4	Q6PJ34_HUMAN
ARHGAP4	Q86UY3_HUMAN
ARHGAP4	Q9UGE8_HUMAN
ARHGAP4	RHG04_HUMAN
ARHGAP8	A8K699_HUMAN
ARHGAP8	PTOR1_HUMAN
ARHGAP8	Q52M44_HUMAN
ARHGAP8	Q6PCC7_HUMAN
ARHGAP8	Q6PJW1_HUMAN
ARHGAP8	Q86XV6_HUMAN
ARHGAP8	Q8IZM6_HUMAN
ARHGAP8	RHG08_HUMAN
ARHGDIB	GDIR2_HUMAN
ARHGEF1	ARHG1_HUMAN
ARHGEF1	Q49AN3_HUMAN
ARHGEF1	Q6NX52_HUMAN
ARHGEF1	Q8NF33_HUMAN
ARHGEF11	ARHGB_HUMAN
ARHGEF11	Q6PFW2_HUMAN
ARHGEF7	ARHG7_HUMAN
ARHGEF7	Q5W9H1_HUMAN
ARHGEF7	Q5ZEZ2_HUMAN
ARHGEF7	Q5ZEZ3_HUMAN
ARHGEF9	ARHG9_HUMAN
ARIH2	ARI2_HUMAN
ARIH2	Q53ET9_HUMAN
ARIH2	Q59HA2_HUMAN
ARIH2	Q6IBL8_HUMAN
ARL1	ARL1_HUMAN
ARL1	Q53XB1_HUMAN
ARL6IP1	AR6P1_HUMAN
ARL6IP5	PRAF3_HUMAN
ARMCX3	ARMX3_HUMAN
ARNTL2	BMAL2_HUMAN
ARPP21	A8K1F3_HUMAN
ARPP21	ARP21_HUMAN
ARRDC4	A8K2F6_HUMAN
ARRDC4	ARRD4_HUMAN
ARSA	ARSA_HUMAN
ARSA	C9IYR4_HUMAN
ARSA	Q63HL5_HUMAN
ARSD	ARSD_HUMAN
ART4	NAR4_HUMAN
ART4	Q3KZ25_HUMAN
ART4	Q3KZ26_HUMAN
ART4	Q3KZ27_HUMAN
ART4	Q3KZ28_HUMAN
ART4	Q3KZ29_HUMAN
ART4	Q3KZ30_HUMAN
ART4	Q5IRA6_HUMAN
ASAH1	A8K0B6_HUMAN
ASAH1	ASAH1_HUMAN
ASAH1	Q53H01_HUMAN
ASAH1	Q96AS2_HUMAN
ASAH1	Q9H715_HUMAN
ASB1	ASB1_HUMAN
ASB12	ASB12_HUMAN
ASB12	Q8N8F5_HUMAN
ASB15	ASB15_HUMAN
ASB15	Q3ZCP3_HUMAN
ASB15	Q3ZCP5_HUMAN
ASB15	Q68D37_HUMAN
ASB15	Q7Z4V1_HUMAN
ASCL1	ASCL1_HUMAN
ASGR1	ASGR1_HUMAN
ASGR1	Q6FGQ5_HUMAN
ASGR2	ASGR2_HUMAN
ASGR2	Q7Z4G9_HUMAN
ASL	ARLY_HUMAN
ASL	Q6XYD2_HUMAN
ASPA	ACY2_HUMAN
ASPA	Q6FH48_HUMAN
ASPN	ASPN_HUMAN
ASPN	Q05CQ6_HUMAN
ASPN	Q5TBF2_HUMAN
ASPN	Q6P528_HUMAN
ASS1	ASSY_HUMAN
ASS1	Q5T6L4_HUMAN
ASS1	Q5T6L5_HUMAN
ASS1	Q5T6L6_HUMAN
ASS1	Q8NFZ7_HUMAN
ATAD3A	ATD3A_HUMAN
ATAD3A	Q5SV14_HUMAN
ATAD3A	Q5SV24_HUMAN
ATF3	ATF3_HUMAN
ATF3	Q59GS7_HUMAN
ATF3	Q5VTZ2_HUMAN
ATF3	Q5VTZ4_HUMAN
ATF3	Q6ICQ9_HUMAN
ATF3	Q7Z566_HUMAN
ATF3	Q7Z567_HUMAN
ATF3	Q8NG55_HUMAN
ATF3	Q8WYM6_HUMAN
ATF5	A8K3H7_HUMAN
ATF5	ATF5_HUMAN
ATG12	ATG12_HUMAN
ATG12	C1IDX9_HUMAN
ATG5	A9UGY9_HUMAN
ATG5	ATG5_HUMAN
ATG5	Q7Z3H3_HUMAN
ATG9B	ATG9B_HUMAN
ATOH8	ATOH8_HUMAN
ATOX1	ATOX1_HUMAN
ATOX1	Q6IBA3_HUMAN
ATP11C	AT11C_HUMAN
ATP1B1	A3KLL5_HUMAN
ATP1B1	AT1B1_HUMAN
ATP1B1	Q58I20_HUMAN
ATP1B1	Q6LEU2_HUMAN
ATP1B4	AT1B4_HUMAN
ATP4A	ATP4A_HUMAN
ATP4A	Q53FM3_HUMAN
ATP4A	Q658V6_HUMAN
ATP5A1	ATPA_HUMAN
ATP5B	ATPB_HUMAN
ATP5B	Q0QEN7_HUMAN
ATP5D	ATPD_HUMAN
ATP5F1	AT5F1_HUMAN
ATP5F1	Q08ET0_HUMAN
ATP5F1	Q53GB3_HUMAN
ATP5F1	Q5QNZ2_HUMAN
ATP5G3	AT5G3_HUMAN
ATP5G3	Q6LEU9_HUMAN
ATP5J	ATP5J_HUMAN
ATP5J	Q6IB54_HUMAN
ATP5J	Q6NZ59_HUMAN
ATP6V1B2	Q59HF3_HUMAN
ATP6V1B2	VATB2_HUMAN
ATP7B	ATP7B_HUMAN
ATP7B	Q17RT3_HUMAN
ATP7B	Q9GZP5_HUMAN
ATP7B	Q9NZ25_HUMAN
ATP8A1	AT8A1_HUMAN
ATP8A1	Q32M35_HUMAN
ATP8A1	Q32M36_HUMAN
ATP8A1	Q4G1C1_HUMAN
ATP8A1	Q4W5J7_HUMAN
ATP8A1	Q4W5P2_HUMAN
ATP8A1	Q59EX4_HUMAN
ATXN1	ATX1_HUMAN
ATXN1	Q96C81_HUMAN
ATXN1	Q96FF1_HUMAN
ATXN10	ATX10_HUMAN
ATXN10	B4DG05_HUMAN
ATXN10	Q7Z524_HUMAN
ATXN10	Q9NTC6_HUMAN
AVPR1A	Q3S2J4_HUMAN
AVPR1A	Q9UH72_HUMAN
AVPR1A	V1AR_HUMAN
AXL	Q15839_HUMAN
AXL	UFO_HUMAN
AZGP1	ZA2G_HUMAN
B3GAT1	B3GA1_HUMAN
B3GAT1	Q8ND18_HUMAN
B4GALT1	B4GT1_HUMAN
B4GALT1	Q86XA6_HUMAN
BAAT	BAAT_HUMAN
BACH2	BACH2_HUMAN
BACH2	Q7Z6Q0_HUMAN
BAD	BAD_HUMAN
BAD	Q6FH21_HUMAN
BAIAP2	BAIP2_HUMAN
BARX1	BARX1_HUMAN
BASP1	BASP1_HUMAN
BAT1	Q59G92_HUMAN
BAT1	Q5HYT6_HUMAN
BAT1	Q5HYU0_HUMAN
BAT1	Q5RJ61_HUMAN
BAT1	Q5RJ65_HUMAN
BAT1	Q5STA0_HUMAN
BAT1	Q5STA2_HUMAN
BAT1	Q5STU1_HUMAN
BAT1	Q5STU2_HUMAN
BAT1	Q5STU3_HUMAN
BAT1	Q5STU9_HUMAN
BAT1	Q7KYK3_HUMAN
BAT1	UAP56_HUMAN
BAX	BAX_HUMAN
BAX	Q5ZPJ0_HUMAN
BAX	Q5ZPJ1_HUMAN
BAX	Q8WXU1_HUMAN
BAX	Q9UEI8_HUMAN
BBC3	BBC3_HUMAN
BBC3	Q96PG8_HUMAN
BBOX1	BODG_HUMAN
BBOX1	Q1KLS6_HUMAN
BBOX1	Q1KLT3_HUMAN
BCAS1	BCAS1_HUMAN
BCAS1	Q05CL3_HUMAN
BCHE	CHLE_HUMAN
BCHE	Q96HL2_HUMAN
BCKDHA	B4DP47_HUMAN
BCKDHA	ODBA_HUMAN
BCKDHA	Q59EI3_HUMAN
BCKDHA	Q658P7_HUMAN
BCKDHA	Q6ZSA3_HUMAN
BCKDHA	Q9UMB3_HUMAN
BCKDHB	ODBB_HUMAN
BCKDHB	Q5T2J3_HUMAN
BCKDHB	Q6LCK9_HUMAN
BCKDHB	Q9BQL0_HUMAN
BCL10	BCL10_HUMAN
BCL10	Q5VUF1_HUMAN
BCL2	BCL2_HUMAN
BCL2	C9JHD5_HUMAN
BCL2	Q96PA0_HUMAN
BCL2A1	B2LA1_HUMAN
BCL2A1	Q86W13_HUMAN
BCL2L1	B2CL1_HUMAN
BCL2L1	Q5QP56_HUMAN
BCL2L1	Q5QP59_HUMAN
BCL2L1	Q5TE63_HUMAN
BCL2L1	Q5TE64_HUMAN
BCL2L1	Q9H1R6_HUMAN
BCL2L10	B2L10_HUMAN
BDH1	BDH_HUMAN
BDH2	BDH2_HUMAN
BDNF	BDNF_HUMAN
BDNF	Q304R1_HUMAN
BDNF	Q6T2C9_HUMAN
BDNF	Q6YNR1_HUMAN
BDNF	Q969N8_HUMAN
BDNF	Q96TC2_HUMAN
BEND6	BEND6_HUMAN
BEX1	BEX1_HUMAN
BGN	PGS1_HUMAN
BGN	Q53FI4_HUMAN
BGN	Q53HU6_HUMAN
BGN	Q8NAB7_HUMAN
BHLHE40	BHE40_HUMAN
BHLHE40	Q6IB83_HUMAN
BHMT	BHMT1_HUMAN
BHMT	Q6EI07_HUMAN
BHMT2	BHMT2_HUMAN
BID	A8ASI8_HUMAN
BID	B2ZP79_HUMAN
BID	B3KT21_HUMAN
BID	BID_HUMAN
BID	Q71RF7_HUMAN
BIN1	BIN1_HUMAN
BIN1	Q659B7_HUMAN
BIN1	Q8WWH9_HUMAN
BIN1	Q9BTH3_HUMAN
BIRC3	BIRC3_HUMAN
BIRC5	BIRC5_HUMAN
BIRC5	Q969L1_HUMAN
BIRC8	BIRC8_HUMAN
BIRC8	Q6PIA0_HUMAN
BLNK	BLNK_HUMAN
BLNK	Q2MD40_HUMAN
BLNK	Q2MD42_HUMAN
BLNK	Q2MD44_HUMAN
BLNK	Q2MD46_HUMAN
BLNK	Q2MD47_HUMAN
BLNK	Q2MD48_HUMAN
BLNK	Q2MD49_HUMAN
BLNK	Q2MD50_HUMAN
BLNK	Q2MD51_HUMAN
BLNK	Q2MD52_HUMAN
BLNK	Q2MD54_HUMAN
BLNK	Q2MD55_HUMAN
BLNK	Q2MD56_HUMAN
BLNK	Q2MD57_HUMAN
BLNK	Q2MD58_HUMAN
BLNK	Q2MD59_HUMAN
BLOC1S1	BL1S1_HUMAN
BLVRB	BLVRB_HUMAN
BMP5	BMP5_HUMAN
BMP6	BMP6_HUMAN
BMP6	Q4JCQ2_HUMAN
BMP6	Q4VBA3_HUMAN
BMPER	BMPER_HUMAN
BMPR1A	BMR1A_HUMAN
BNIP3	BNIP3_HUMAN
BNIP3	Q53HF4_HUMAN
BNIP3	Q66K24_HUMAN
BNIP3	Q6NVY4_HUMAN
BRCA2	BRCA2_HUMAN
BRCA2	Q5TBJ7_HUMAN
BRCA2	Q8IU64_HUMAN
BRCA2	Q8IU77_HUMAN
BRCA2	Q8IU82_HUMAN
BRCA2	Q9BX99_HUMAN
BRCA2	Q9H265_HUMAN
BRCA2	Q9H4L2_HUMAN
BRCA2	Q9H4L3_HUMAN
BRI3BP	BRI3B_HUMAN
BRI3BP	Q8IX35_HUMAN
BRP44L	BR44L_HUMAN
BRP44L	Q5TI65_HUMAN
BRPF1	BRPF1_HUMAN
BST1	BST1_HUMAN
BST1	Q1XII0_HUMAN
BTBD16	BTBDG_HUMAN
BTBD6	BTBD6_HUMAN
BTG2	BTG2_HUMAN
BUB1B	BUB1B_HUMAN
BZW1	BZW1_HUMAN
BZW1	Q3LIC9_HUMAN
BZW1	Q53FN7_HUMAN
C10orf111	CJ111_HUMAN
C10orf116	APM2_HUMAN
C10orf116	Q5TBU5_HUMAN
C10orf119	CJ119_HUMAN
C11orf54	CK054_HUMAN
C11orf71	CK071_HUMAN
C14orf1	ERG28_HUMAN
C14orf1	Q6FII3_HUMAN
C14orf1	Q86TW5_HUMAN
C14orf105	CN105_HUMAN
C14orf105	Q05C89_HUMAN
C14orf105	Q17R99_HUMAN
C14orf43	CN043_HUMAN
C14orf43	Q8NF55_HUMAN
C14orf45	CN045_HUMAN
C14orf68	B2RP39_HUMAN
C14orf68	HDMCP_HUMAN
C15orf33	CO033_HUMAN
C15orf42	B3KVV9_HUMAN
C15orf42	CO042_HUMAN
C15orf5	CO005_HUMAN
C16orf13	CP013_HUMAN
C16orf45	CP045_HUMAN
C19orf22	CS022_HUMAN
C19orf43	CS043_HUMAN
C19orf43	Q9H3J7_HUMAN
C19orf63	INM02_HUMAN
C19orf66	CS066_HUMAN
C1QA	C1QA_HUMAN
C1QA	Q9H2L7_HUMAN
C1QB	C1QB_HUMAN
C1QB	Q5T960_HUMAN
C1QB	Q6LDZ7_HUMAN
C1QBP	C1QBP_HUMAN
C1QBP	Q9NQ45_HUMAN
C1QTNF1	C1QT1_HUMAN
C1QTNF1	Q6ZMH6_HUMAN
C1R	C1R_HUMAN
C1R	Q53HT9_HUMAN
C1R	Q53HU9_HUMAN
C1RL	C1RL_HUMAN
C1RL	Q6P672_HUMAN
C1RL	Q9H804_HUMAN
C1S	C1S_HUMAN
C1orf168	A6NMT4_HUMAN
C1orf168	CA168_HUMAN
C1orf183	CA183_HUMAN
C1orf216	CA216_HUMAN
C1orf55	CA055_HUMAN
C2	B4DV20_HUMAN
C2	CO2_HUMAN
C2	Q53GZ8_HUMAN
C2	Q53HP3_HUMAN
C2	Q5JP69_HUMAN
C2	Q5ST52_HUMAN
C2	Q6LBG4_HUMAN
C2	Q6LDG4_HUMAN
C2	Q7Z685_HUMAN
C2	Q86SV5_HUMAN
C2	Q8N6L6_HUMAN
C2	Q95IG1_HUMAN
C20orf3	APMAP_HUMAN
C21orf33	ES1_HUMAN
C21orf59	CU059_HUMAN
C21orf59	Q53FH0_HUMAN
C21orf59	Q8N9H5_HUMAN
C21orf59	Q96NJ2_HUMAN
C21orf59	Q9NX33_HUMAN
C2orf55	CB055_HUMAN
C3	CO3_HUMAN
C3	Q6LDJ0_HUMAN
C3AR1	A8K2H7_HUMAN
C3AR1	C3AR_HUMAN
C3AR1	Q53FA1_HUMAN
C3orf34	CC034_HUMAN
C4B	A7E2V2_HUMAN
C4B	CO4B_HUMAN
C4B	Q6U2E0_HUMAN
C4B	Q6U2E5_HUMAN
C4B	Q6U2E9_HUMAN
C4B	Q6U2F3_HUMAN
C4B	Q6U2F4_HUMAN
C4B	Q6U2F6_HUMAN
C4B	Q6U2G0_HUMAN
C4B	Q6U2G1_HUMAN
C4B	Q6U2H4_HUMAN
C4B	Q6U2I5_HUMAN
C4B	Q6U2L1_HUMAN
C4B	Q6U2L6_HUMAN
C4B	Q6U2L7_HUMAN
C4B	Q6U2L9_HUMAN
C4B	Q6U2M2_HUMAN
C4B	Q6U2M5_HUMAN
C4B	Q6VCV8_HUMAN
C4B	Q6XMI6_HUMAN
C4B	Q96SA7_HUMAN
C4B	Q96SA8_HUMAN
C4B	Q9UMV1_HUMAN
C4B	Q9UNU2_HUMAN
C4BPA	C4BPA_HUMAN
C4BPA	Q5VVQ8_HUMAN
C4BPB	C4BPB_HUMAN
C4BPB	Q5VVQ7_HUMAN
C4orf19	CD019_HUMAN
C5	CO5_HUMAN
C5	Q59GS8_HUMAN
C5AR1	C5AR_HUMAN
C5orf27	CE027_HUMAN
C5orf33	CE033_HUMAN
C5orf33	Q49AR0_HUMAN
C5orf4	CE004_HUMAN
C5orf4	Q9UHK3_HUMAN
C6	CO6_HUMAN
C6orf129	CF129_HUMAN
C6orf145	CF145_HUMAN
C6orf204	CF204_HUMAN
C6orf204	Q3ZCQ5_HUMAN
C6orf204	Q5R353_HUMAN
C6orf204	Q5R354_HUMAN
C7	CO7_HUMAN
C7	Q05CI3_HUMAN
C7	Q8TCS7_HUMAN
C8A	CO8A_HUMAN
C8A	Q05CV2_HUMAN
C8B	CO8B_HUMAN
C8B	Q05CV3_HUMAN
C8orf4	CH004_HUMAN
C9	CO9_HUMAN
C9	Q9UGI4_HUMAN
C9orf103	GNTK_HUMAN
C9orf150	CI150_HUMAN
C9orf156	NAP1_HUMAN
C9orf156	Q5T112_HUMAN
C9orf156	Q5T114_HUMAN
C9orf156	Q6Y2L2_HUMAN
C9orf3	AMPO_HUMAN
C9orf72	CI072_HUMAN
C9orf72	Q9NUW0_HUMAN
C9orf95	NRK1_HUMAN
C9orf95	Q5W125_HUMAN
CA1	CAH1_HUMAN
CA13	CAH13_HUMAN
CA2	CAH2_HUMAN
CA2	Q6LD99_HUMAN
CA3	CAH3_HUMAN
CA5A	CAH5A_HUMAN
CA6	CAH6_HUMAN
CA6	Q5FBW3_HUMAN
CA6	Q5FC00_HUMAN
CA6	Q8N4G4_HUMAN
CACHD1	CAHD1_HUMAN
CACNB2	A6PVM7_HUMAN
CACNB2	CACB2_HUMAN
CACNB2	Q59H42_HUMAN
CACNB2	Q5QJ99_HUMAN
CACNB2	Q5QJA0_HUMAN
CACNB2	Q5UM67_HUMAN
CACNB2	Q5UM68_HUMAN
CACNB2	Q5VVH1_HUMAN
CACNB2	Q5VWV7_HUMAN
CACNB2	Q6TME0_HUMAN
CACNB2	Q6TME1_HUMAN
CACNB2	Q6TME2_HUMAN
CACNB2	Q6TME3_HUMAN
CACNB3	CACB3_HUMAN
CALB2	A6NER6_HUMAN
CALB2	CALB2_HUMAN
CALD1	A8K0X1_HUMAN
CALD1	CALD1_HUMAN
CALD1	Q05DR4_HUMAN
CALD1	Q5HY93_HUMAN
CALD1	Q6P707_HUMAN
CALD1	Q6PJM5_HUMAN
CALD1	Q7Z2Y9_HUMAN
CALD1	Q8NI76_HUMAN
CALD1	Q9NYG1_HUMAN
CALHM2	CAHM2_HUMAN
CALM1	B4DJ51_HUMAN
CALM1	CALM_HUMAN
CALM1	Q96HY3_HUMAN
CALM1	Q9BRL5_HUMAN
CAMK1D	KCC1D_HUMAN
CAMK1D	Q5SQQ7_HUMAN
CAMK2B	A4D2J9_HUMAN
CAMK2B	A4D2K5_HUMAN
CAMK2B	KCC2B_HUMAN
CAMK2B	Q53H78_HUMAN
CAMK2B	Q75KE9_HUMAN
CAMK2B	Q75LA8_HUMAN
CAMK4	KCC4_HUMAN
CAPNS1	CPNS1_HUMAN
CAPZA1	CAZA1_HUMAN
CARS	A8MVQ3_HUMAN
CARS	Q53HG6_HUMAN
CARS	Q59HE5_HUMAN
CARS	Q5HYE4_HUMAN
CARS	SYCC_HUMAN
CASP1	CASP1_HUMAN
CASP1	Q5FBZ0_HUMAN
CASP10	CASPA_HUMAN
CASP10	Q68HC0_HUMAN
CASP3	CASP3_HUMAN
CASP3	Q5HYI3_HUMAN
CASP7	CASP7_HUMAN
CASP7	Q5SVL2_HUMAN
CASP8	CASP8_HUMAN
CASP8	Q6NVI2_HUMAN
CASP8	Q9HBU4_HUMAN
CASP9	CASP9_HUMAN
CASP9	Q59GG2_HUMAN
CASP9	Q5JRU2_HUMAN
CASP9	Q5JRU8_HUMAN
CASP9	Q5UGI1_HUMAN
CASP9	Q6EV95_HUMAN
CAT	CATA_HUMAN
CAT	Q8TAK2_HUMAN
CBFA2T3	MTG16_HUMAN
CBR1	CBR1_HUMAN
CBR4	CBR4_HUMAN
CBS	CBS_HUMAN
CBS	Q3LR94_HUMAN
CBS	Q96EH7_HUMAN
CBS	Q9NTF0_HUMAN
CCDC109A	C109A_HUMAN
CCDC109B	C109B_HUMAN
CCDC25	CCD25_HUMAN
CCDC25	Q0P663_HUMAN
CCDC25	Q0VGD4_HUMAN
CCDC25	Q6PK69_HUMAN
CCDC25	Q7Z5U5_HUMAN
CCDC3	CCDC3_HUMAN
CCDC3	Q5VYV9_HUMAN
CCDC3	Q7Z4C2_HUMAN
CCDC47	CCD47_HUMAN
CCDC69	CCD69_HUMAN
CCDC69	Q6QIX4_HUMAN
CCDC69	Q7L2X4_HUMAN
CCDC69	Q9H8E5_HUMAN
CCDC69	Q9Y4P0_HUMAN
CCDC9	B4DXW2_HUMAN
CCDC9	CCDC9_HUMAN
CCDC94	CCD94_HUMAN
CCDC94	Q7LE05_HUMAN
CCK	CCKN_HUMAN
CCK	Q6FG82_HUMAN
CCL13	CCL13_HUMAN
CCL14	CCL14_HUMAN
CCL14	CCL15_HUMAN
CCL15	CCL14_HUMAN
CCL15	CCL15_HUMAN
CCL19	CCL19_HUMAN
CCL19	Q6IBD6_HUMAN
CCL2	CCL2_HUMAN
CCL2	Q6UZ82_HUMAN
CCL21	CCL21_HUMAN
CCL21	Q5VZ73_HUMAN
CCL21	Q6ICR7_HUMAN
CCL23	CCL23_HUMAN
CCL3	A0N0R1_HUMAN
CCL3	CCL3_HUMAN
CCL3	Q14745_HUMAN
CCL3L3	CL3L1_HUMAN
CCL4	CC4L_HUMAN
CCL4	CCL4_HUMAN
CCL4	Q6JSE0_HUMAN
CCL4	Q7M4M2_HUMAN
CCND1	CCND1_HUMAN
CCND1	Q14092_HUMAN
CCND1	Q5MGB2_HUMAN
CCND1	Q6FI00_HUMAN
CCND1	Q9H014_HUMAN
CCNE1	CCNE1_HUMAN
CCNG2	CCNG2_HUMAN
CCNG2	Q6FGA7_HUMAN
CCNG2	Q6FGC6_HUMAN
CCNG2	Q8N5D4_HUMAN
CCNH	CCNH_HUMAN
CCNH	Q59FW7_HUMAN
CCNO	CCNO_HUMAN
CCPG1	CCPG1_HUMAN
CCR1	CCR1_HUMAN
CCR1	Q5U003_HUMAN
CCR5	CCR5_HUMAN
CCR5	Q38L21_HUMAN
CCR5	Q3L3Q6_HUMAN
CCR5	Q5EKM8_HUMAN
CCR5	Q5EKM9_HUMAN
CCR5	Q5EKN0_HUMAN
CCR5	Q5KSY4_HUMAN
CCR5	Q5KSY5_HUMAN
CCR5	Q5QIN9_HUMAN
CCR5	Q5QIP0_HUMAN
CCR5	Q5QIP1_HUMAN
CCR5	Q9P1T4_HUMAN
CCR5	Q9P1T8_HUMAN
CCR5	Q9UBJ7_HUMAN
CCR5	Q9UBT9_HUMAN
CCR5	Q9UN23_HUMAN
CCR5	Q9UN24_HUMAN
CCR5	Q9UN25_HUMAN
CCR5	Q9UN26_HUMAN
CCR5	Q9UN27_HUMAN
CCR5	Q9UN28_HUMAN
CCR6	A8K8A3_HUMAN
CCR6	CCNL2_HUMAN
CCR6	CCR6_HUMAN
CCR6	Q53EZ5_HUMAN
CCR6	Q9H2N7_HUMAN
CCS	CCS_HUMAN
CCS	Q8NEV0_HUMAN
CD14	CD14_HUMAN
CD163	C163A_HUMAN
CD164	MUC24_HUMAN
CD1A	CD1A_HUMAN
CD1A	Q8N5T0_HUMAN
CD1D	CD1D_HUMAN
CD209	A6NK99_HUMAN
CD209	B2R907_HUMAN
CD209	B4E2A8_HUMAN
CD209	CD209_HUMAN
CD300A	CLM8_HUMAN
CD300A	Q9P0F3_HUMAN
CD302	A8K5G4_HUMAN
CD302	CD302_HUMAN
CD302	LY75_HUMAN
CD302	Q59H44_HUMAN
CD36	A4D1B1_HUMAN
CD36	CD36_HUMAN
CD36	Q13965_HUMAN
CD36	Q9BQA7_HUMAN
CD36	Q9BZM7_HUMAN
CD36	Q9BZM9_HUMAN
CD36	Q9BZN0_HUMAN
CD36	Q9BZN1_HUMAN
CD36	Q9BZN2_HUMAN
CD36	Q9BZN6_HUMAN
CD3E	CD3E_HUMAN
CD4	CD4_HUMAN
CD4	Q13969_HUMAN
CD4	Q6LCP8_HUMAN
CD44	CD44_HUMAN
CD44	O95370_HUMAN
CD44	Q86UZ1_HUMAN
CD44	Q99900_HUMAN
CD44	Q9H5A3_HUMAN
CD44	Q9H5A4_HUMAN
CD44	Q9H5A6_HUMAN
CD44	Q9H5A7_HUMAN
CD44	Q9P2Z2_HUMAN
CD48	CD48_HUMAN
CD48	Q6IAZ2_HUMAN
CD48	Q8MGR0_HUMAN
CD53	CD53_HUMAN
CD58	LFA3_HUMAN
CD58	Q14748_HUMAN
CD58	Q16393_HUMAN
CD58	Q9BRW0_HUMAN
CD59	CD59_HUMAN
CD59	Q6FHM9_HUMAN
CD5L	CD5L_HUMAN
CD68	B4DVT4_HUMAN
CD68	CD68_HUMAN
CD69	CD69_HUMAN
CD69	Q53ZX0_HUMAN
CD69	Q6LAB3_HUMAN
CD74	HG2A_HUMAN
CD74	Q9TNQ4_HUMAN
CD74	Q9TNQ6_HUMAN
CD80	A0N0P2_HUMAN
CD80	CD80_HUMAN
CD80	Q5DTA9_HUMAN
CD80	Q5DTB0_HUMAN
CD80	Q6LCB7_HUMAN
CD81	CD81_HUMAN
CD81	Q59FS9_HUMAN
CD82	CD82_HUMAN
CD82	Q6LET0_HUMAN
CD82	Q7Z5N2_HUMAN
CD83	CD83_HUMAN
CD86	CD86_HUMAN
CD9	CD9_HUMAN
CD9	Q56CY1_HUMAN
CDA	CDD_HUMAN
CDA	Q6GV32_HUMAN
CDA	Q71UE9_HUMAN
CDAN1	CDAN1_HUMAN
CDC14B	A8MQ20_HUMAN
CDC14B	CC14B_HUMAN
CDC14B	Q5JU06_HUMAN
CDC25C	MPIP3_HUMAN
CDC25C	Q9H2F0_HUMAN
CDC37	CDC37_HUMAN
CDC37	Q6FG59_HUMAN
CDC37L1	CD37L_HUMAN
CDC42	CDC42_HUMAN
CDC42	Q5JYX0_HUMAN
CDC42	Q9UJM0_HUMAN
CDC42	Q9UJM1_HUMAN
CDH1	A8K1U7_HUMAN
CDH1	CADH1_HUMAN
CDH1	Q9UII7_HUMAN
CDH1	Q9UII8_HUMAN
CDH10	CAD10_HUMAN
CDH19	CAD19_HUMAN
CDH19	Q96KY9_HUMAN
CDH4	CADH4_HUMAN
CDH4	Q8NB64_HUMAN
CDH4	Q8ND09_HUMAN
CDH4	Q9H6K0_HUMAN
CDH5	CADH5_HUMAN
CDH5	Q4VAI4_HUMAN
CDH5	Q4VAI5_HUMAN
CDH5	Q4VAI6_HUMAN
CDH5	Q59EA3_HUMAN
CDK2	CDK2_HUMAN
CDK2	O75100_HUMAN
CDK5	A1XKG3_HUMAN
CDK5	CDK5_HUMAN
CDK5	Q6IAW3_HUMAN
CDK5R1	CD5R1_HUMAN
CDK5R1	Q8N619_HUMAN
CDK5R1	Q8TAM4_HUMAN
CDKL1	CDKL1_HUMAN
CDKL1	Q8WXQ5_HUMAN
CDKN1A	CDN1A_HUMAN
CDKN1A	Q59ED0_HUMAN
CDKN1A	Q6FI05_HUMAN
CDKN1A	Q96LE1_HUMAN
CDKN1B	CDN1B_HUMAN
CDKN1B	Q6I9V6_HUMAN
CDKN1B	Q708J1_HUMAN
CDKN1B	Q96TE0_HUMAN
CDKN1B	Q9NYG6_HUMAN
CDKN1B	Q9UH60_HUMAN
CDKN1C	CDN1C_HUMAN
CDKN2C	CDN2C_HUMAN
CDKN2C	Q6ICV4_HUMAN
CDKN2C	Q9P1T2_HUMAN
CDO1	CDO1_HUMAN
CDO1	Q16857_HUMAN
CEACAM1	CEAM1_HUMAN
CEACAM1	Q13854_HUMAN
CEACAM1	Q13859_HUMAN
CEACAM1	Q13860_HUMAN
CEACAM1	Q16170_HUMAN
CEACAM1	Q3KRG8_HUMAN
CEACAM1	Q5UB49_HUMAN
CEACAM1	Q7KYP5_HUMAN
CEACAM1	Q96CA7_HUMAN
CEACAM5	CEAM5_HUMAN
CEACAM5	P78448_HUMAN
CEACAM5	Q13984_HUMAN
CEACAM5	Q53G30_HUMAN
CEACAM5	Q68DM9_HUMAN
CEACAM5	Q7KZ28_HUMAN
CEACAM5	Q8N4D0_HUMAN
CEBPD	CEBPD_HUMAN
CEBPD	Q504X4_HUMAN
CEP135	CP135_HUMAN
CEP164	CE164_HUMAN
CEP164	Q6ZU43_HUMAN
CEP164	Q9NTH6_HUMAN
CES1	EST1_HUMAN
CES1	Q2WG84_HUMAN
CES1	Q6LAP9_HUMAN
CES2	EST2_HUMAN
CES2	Q4G0E9_HUMAN
CES2	Q53H57_HUMAN
CES2	Q6IPK9_HUMAN
CES8	EST8_HUMAN
CES8	Q6P2E5_HUMAN
CETP	CETP_HUMAN
CETP	Q5TZS4_HUMAN
CETP	Q8IWL9_HUMAN
CETP	Q9H4L8_HUMAN
CFC1	CFC1_HUMAN
CFH	CFAH_HUMAN
CFH	Q14006_HUMAN
CFH	Q5TFM2_HUMAN
CFHR2	FHR2_HUMAN
CFHR3	B4DPR0_HUMAN
CFHR3	FHR3_HUMAN
CFHR3	Q6NSD3_HUMAN
CFHR3	Q8WW96_HUMAN
CFHR4	FHR4_HUMAN
CFHR4	Q5DVJ7_HUMAN
CFI	A8K3L0_HUMAN
CFI	CFAI_HUMAN
CFI	Q6LAM0_HUMAN
CFI	Q6LAM1_HUMAN
CFI	Q8WW88_HUMAN
CFL2	COF2_HUMAN
CFL2	Q549N0_HUMAN
CFLAR	CFLAR_HUMAN
CFLAR	Q53TS6_HUMAN
CFLAR	Q59F61_HUMAN
CFP	PROP_HUMAN
CFTR	CFTR_HUMAN
CFTR	Q16049_HUMAN
CFTR	Q20BH0_HUMAN
CFTR	Q20BI4_HUMAN
CFTR	Q20BI6_HUMAN
CFTR	Q20BJ8_HUMAN
CFTR	Q2I0A3_HUMAN
CFTR	Q2I0A9_HUMAN
CFTR	Q5I6F9_HUMAN
CFTR	Q5I6N4_HUMAN
CFTR	Q5I6N5_HUMAN
CFTR	Q5I6N6_HUMAN
CFTR	Q5I6N7_HUMAN
CFTR	Q6KE95_HUMAN
CFTR	Q6KEA0_HUMAN
CFTR	Q6KEA5_HUMAN
CFTR	Q6KEB2_HUMAN
CFTR	Q6KEB8_HUMAN
CFTR	Q6KEC3_HUMAN
CFTR	Q6KEC8_HUMAN
CFTR	Q6KED3_HUMAN
CFTR	Q6KED8_HUMAN
CFTR	Q6KEE3_HUMAN
CFTR	Q6KEE7_HUMAN
CFTR	Q6KEF1_HUMAN
CFTR	Q6KEF5_HUMAN
CFTR	Q6KEF9_HUMAN
CFTR	Q6KEG3_HUMAN
CFTR	Q6KEG6_HUMAN
CFTR	Q6KEG9_HUMAN
CFTR	Q6KEH3_HUMAN
CFTR	Q6KEH6_HUMAN
CFTR	Q6KEH8_HUMAN
CFTR	Q6KEH9_HUMAN
CFTR	Q6KEI2_HUMAN
CFTR	Q6KEI7_HUMAN
CFTR	Q6KEI8_HUMAN
CFTR	Q6KEJ1_HUMAN
CFTR	Q6KEJ4_HUMAN
CFTR	Q6KEJ7_HUMAN
CFTR	Q99904_HUMAN
CFTR	Q99989_HUMAN
CFTR	Q9UJ19_HUMAN
CFTR	Q9UML7_HUMAN
CFTR	Q9UML8_HUMAN
CFTR	Q9UMN4_HUMAN
CGA	GLHA_HUMAN
CGA	Q6I9S8_HUMAN
CGA	Q96QJ4_HUMAN
CGREF1	B4DXY8_HUMAN
CGREF1	B5MCB7_HUMAN
CGREF1	B5MCP5_HUMAN
CGREF1	CGRE1_HUMAN
CH25H	CH25H_HUMAN
CHD3	B3KWV4_HUMAN
CHD3	CHD3_HUMAN
CHD3	Q2TAZ1_HUMAN
CHD9	CHD9_HUMAN
CHD9	Q461N2_HUMAN
CHD9	Q8N4Q2_HUMAN
CHD9	Q8NAR9_HUMAN
CHI3L1	CH3L1_HUMAN
CHI3L1	Q59FK1_HUMAN
CHI3L1	Q9NY41_HUMAN
CHM	A1L4D2_HUMAN
CHM	Q8N917_HUMAN
CHM	RAE1_HUMAN
CHN2	A4D1A2_HUMAN
CHN2	CHIO_HUMAN
CHN2	Q75MY2_HUMAN
CHRM4	ACM4_HUMAN
CHRM4	Q96RG8_HUMAN
CHRNA5	ACHA5_HUMAN
CHRNA5	Q6EWN4_HUMAN
CHST4	CHST4_HUMAN
CHST7	CHST7_HUMAN
CHUK	IKKA_HUMAN
CHUK	Q562E6_HUMAN
CHUK	Q59GT1_HUMAN
CHURC1	CHUR_HUMAN
CIB2	CIB2_HUMAN
CIB2	Q05BT6_HUMAN
CIB2	Q5TZX7_HUMAN
CIDEB	CIDEB_HUMAN
CISH	CISH_HUMAN
CISH	Q71V34_HUMAN
CITED2	CITE2_HUMAN
CITED4	CITE4_HUMAN
CKAP2	CKAP2_HUMAN
CKB	KCRB_HUMAN
CLASP2	CLAP2_HUMAN
CLASP2	Q07A19_HUMAN
CLASP2	Q07A20_HUMAN
CLASP2	Q6N029_HUMAN
CLASP2	Q8NB74_HUMAN
CLASP2	Q96F87_HUMAN
CLC	C5HZ13_HUMAN
CLC	LPPL_HUMAN
CLCN3	CLCN3_HUMAN
CLCN3	Q7Z4M4_HUMAN
CLDN1	A5JSJ9_HUMAN
CLDN1	CLD1_HUMAN
CLDN1	Q7Z4X9_HUMAN
CLDN10	CLD10_HUMAN
CLDN10	Q5W075_HUMAN
CLDN10	Q6IBF9_HUMAN
CLDN10	Q96N78_HUMAN
CLDN7	CLD7_HUMAN
CLEC1B	CLC1B_HUMAN
CLEC2B	CLC2B_HUMAN
CLEC3B	Q68DS3_HUMAN
CLEC3B	TETN_HUMAN
CLEC4G	CLC4G_HUMAN
CLEC4G	Q08G24_HUMAN
CLEC4G	Q6XYD1_HUMAN
CLEC4M	B4E2Z5_HUMAN
CLEC4M	CLC4M_HUMAN
CLEC4M	Q2TB20_HUMAN
CLEC7A	CLC7A_HUMAN
CLEC7A	Q68D78_HUMAN
CLEC7A	Q6UWR2_HUMAN
CLEC7A	Q96D32_HUMAN
CLEC7A	Q96PA4_HUMAN
CLIC1	CLIC1_HUMAN
CLIC1	Q53FB0_HUMAN
CLIC1	Q5SRT3_HUMAN
CLIC4	CLIC4_HUMAN
CLIC4	Q6FIC5_HUMAN
CLIC4	Q9NVF8_HUMAN
CLIP4	CLIP4_HUMAN
CLIP4	Q4ZFY2_HUMAN
CLIP4	Q53QT5_HUMAN
CLIP4	Q59GR7_HUMAN
CLN8	CH061_HUMAN
CLN8	CLN8_HUMAN
CLPP	CLPP_HUMAN
CLRN3	CLRN3_HUMAN
CLSTN3	CSTN3_HUMAN
CLSTN3	Q5UE57_HUMAN
CLSTN3	Q8IUW6_HUMAN
CLU	CLUS_HUMAN
CLU	Q6LDQ3_HUMAN
CLU	Q8IWL5_HUMAN
CLU	Q8IWM0_HUMAN
CLUL1	CLUL1_HUMAN
CLYBL	CLYBL_HUMAN
CLYBL	Q5JVC0_HUMAN
CMAH	CMAH_HUMAN
CMBL	CMBL_HUMAN
CMPK1	B2R6S5_HUMAN
CMPK1	KCY_HUMAN
CNBP	A8K7V4_HUMAN
CNBP	CNBP_HUMAN
CNBP	Q4JGY0_HUMAN
CNBP	Q4JGY1_HUMAN
CNBP	Q5U0E9_HUMAN
CNBP	Q6T598_HUMAN
CNDP1	CNDP1_HUMAN
CNDP2	CNDP2_HUMAN
CNDP2	Q9H7K8_HUMAN
CNDP2	Q9NUV1_HUMAN
CNDP2	Q9NW02_HUMAN
CNGA1	CNGA1_HUMAN
CNGA1	Q08124_HUMAN
CNGA1	Q4W5E3_HUMAN
CNN2	A6NFI4_HUMAN
CNN2	CNN2_HUMAN
CNN2	Q53GK7_HUMAN
CNN2	Q6FHC3_HUMAN
CNN2	Q6FHE4_HUMAN
CNOT10	CNOTA_HUMAN
CNTF	CNTF_HUMAN
CNTF	Q96JQ9_HUMAN
CNTF	Q9UI87_HUMAN
CNTF	ZFP91_HUMAN
CNTN3	CNTN3_HUMAN
CNTNAP1	CNTP1_HUMAN
COASY	COASY_HUMAN
COBLL1	COBL1_HUMAN
COG3	COG3_HUMAN
COG3	Q8TE06_HUMAN
COG5	A8MUI4_HUMAN
COG5	COG5_HUMAN
COL14A1	COEA1_HUMAN
COL14A1	Q4G0W3_HUMAN
COL18A1	COIA1_HUMAN
COL18A1	Q8NG19_HUMAN
COL1A1	CO1A1_HUMAN
COL1A1	Q14042_HUMAN
COL1A1	Q6LAN8_HUMAN
COL1A1	Q9UMA6_HUMAN
COL22A1	COMA1_HUMAN
COL3A1	CO3A1_HUMAN
COL3A1	Q6LBY7_HUMAN
COL6A2	CO6A2_HUMAN
COL6A2	Q6FHW5_HUMAN
COL6A2	Q7LCA7_HUMAN
COL6A2	Q9BUM6_HUMAN
COL6A3	A8MT30_HUMAN
COL6A3	B4E3U5_HUMAN
COL6A3	B7ZMJ7_HUMAN
COL6A3	B7ZW00_HUMAN
COL6A3	CO6A3_HUMAN
COL6A3	Q59F25_HUMAN
COL6A3	Q63HQ4_HUMAN
COL6A3	Q6MZG6_HUMAN
COL6A3	Q8N4Z1_HUMAN
COLEC10	COL10_HUMAN
COLEC11	COL11_HUMAN
COMT	COMT_HUMAN
COMT	Q7KZP0_HUMAN
COMT	Q9BWC7_HUMAN
COPB2	COPB2_HUMAN
COPS6	CSN6_HUMAN
CORO2A	A8K9S3_HUMAN
CORO2A	COR2A_HUMAN
CORO2A	Q59EK2_HUMAN
COTL1	COTL1_HUMAN
COX4I1	COX41_HUMAN
COX4I1	Q6P666_HUMAN
COX4I1	Q86WV2_HUMAN
COX4NB	C9JB21_HUMAN
COX4NB	CX4NB_HUMAN
COX4NB	Q53Y03_HUMAN
COX5A	COX5A_HUMAN
COX5A	Q71UP1_HUMAN
COX5B	COX5B_HUMAN
COX5B	Q53YB7_HUMAN
COX5B	Q6FHJ9_HUMAN
COX5B	Q6FHM4_HUMAN
COX6B1	CX6B1_HUMAN
COX6C	COX6C_HUMAN
COX7A2L	COX7R_HUMAN
COX7A2L	Q6FGA0_HUMAN
COX7B	COX7B_HUMAN
CP	A5PL27_HUMAN
CP	CERU_HUMAN
CP	Q1L857_HUMAN
CP	Q6NSB2_HUMAN
CPA3	CBPA3_HUMAN
CPA4	A4D1M3_HUMAN
CPA4	B7Z576_HUMAN
CPA4	CBPA4_HUMAN
CPB2	CBPB2_HUMAN
CPEB3	B3KXC1_HUMAN
CPEB3	CPEB3_HUMAN
CPM	CBPM_HUMAN
CPN1	B1AP59_HUMAN
CPN1	CBPN_HUMAN
CPN2	CPN2_HUMAN
CPS1	CPSM_HUMAN
CPS1	Q05CV6_HUMAN
CPS1	Q53TL5_HUMAN
CPS1	Q59HF8_HUMAN
CPS1	Q5R206_HUMAN
CPS1	Q5R207_HUMAN
CPS1	Q5R208_HUMAN
CPS1	Q5R209_HUMAN
CPS1	Q5R210_HUMAN
CPS1	Q5R211_HUMAN
CPS1	Q6PEK7_HUMAN
CPT1A	B2RAQ8_HUMAN
CPT1A	CPT1A_HUMAN
CPT1A	Q8WZ48_HUMAN
CPT2	CPT2_HUMAN
CPT2	Q53G79_HUMAN
CPVL	CPVL_HUMAN
CPVL	Q75MM4_HUMAN
CPVL	Q9NZ90_HUMAN
CR1	CR1_HUMAN
CR1	Q16521_HUMAN
CR1	Q16744_HUMAN
CR1	Q5SBJ5_HUMAN
CR1	Q5SBJ6_HUMAN
CR1	Q5SBJ7_HUMAN
CR1	Q5SBJ8_HUMAN
CR1	Q5SBJ9_HUMAN
CR1	Q5SBK0_HUMAN
CR1	Q5SBK1_HUMAN
CR1	Q5SBK2_HUMAN
CR1	Q5SBK3_HUMAN
CR1	Q5SBK4_HUMAN
CR1	Q5SBK5_HUMAN
CR1	Q5SBK6_HUMAN
CR1	Q5SR40_HUMAN
CR1	Q5SR41_HUMAN
CR1	Q5SR42_HUMAN
CR1	Q5SR43_HUMAN
CR1	Q5SR44_HUMAN
CR1	Q9HB98_HUMAN
CR1	Q9HB99_HUMAN
CR1	Q9HC54_HUMAN
CR1	Q9HC55_HUMAN
CR1	Q9UQR7_HUMAN
CRADD	CRADD_HUMAN
CRADD	Q53XL1_HUMAN
CRADD	Q8IY43_HUMAN
CRAT	CACP_HUMAN
CREB3L3	CR3L3_HUMAN
CREB3L3	Q9Y4A3_HUMAN
CREBL2	CRBL2_HUMAN
CREM	A8K014_HUMAN
CREM	A8K3J7_HUMAN
CREM	A8K6A1_HUMAN
CREM	A8MPQ2_HUMAN
CREM	CREM_HUMAN
CREM	Q14501_HUMAN
CREM	Q59FC7_HUMAN
CREM	Q5T9H8_HUMAN
CREM	Q5T9I5_HUMAN
CREM	Q5W1A7_HUMAN
CREM	Q5W1B0_HUMAN
CREM	Q5W1B2_HUMAN
CREM	Q96AG7_HUMAN
CRH	CRF_HUMAN
CRHBP	CRHBP_HUMAN
CRHBP	Q53F32_HUMAN
CRISPLD2	CRLD2_HUMAN
CROT	OCTC_HUMAN
CROT	Q86V17_HUMAN
CRP	CRP_HUMAN
CRP	Q5VVP7_HUMAN
CRYL1	CRYL1_HUMAN
CRYM	CRYM_HUMAN
CRYM	Q5HYB7_HUMAN
CRYZ	A6NN60_HUMAN
CRYZ	Q5HYE7_HUMAN
CRYZ	QOR_HUMAN
CSF1R	CSF1R_HUMAN
CSF1R	Q59HE0_HUMAN
CSF1R	Q6LEI2_HUMAN
CSF1R	Q86VW7_HUMAN
CSNK1A1L	KC1AL_HUMAN
CSNK1G3	KC1G3_HUMAN
CSRP1	B4E2T4_HUMAN
CSRP1	CSRP1_HUMAN
CSRP1	Q59EQ5_HUMAN
CSRP1	Q5U0J2_HUMAN
CSRP1	Q6AI18_HUMAN
CSRP1	Q6AWD1_HUMAN
CSRP1	Q6ZMS3_HUMAN
CSRP1	Q9BTA4_HUMAN
CST3	CYTC_HUMAN
CST6	CYTM_HUMAN
CST6	Q6IBD2_HUMAN
CTAG2	CTAG2_HUMAN
CTBS	DIAC_HUMAN
CTBS	Q5VX50_HUMAN
CTBS	Q5VX51_HUMAN
CTBS	Q8TC97_HUMAN
CTGF	CTGF_HUMAN
CTGF	Q5M8T4_HUMAN
CTGF	Q6FHL8_HUMAN
CTGF	Q9UDL6_HUMAN
CTH	CGL_HUMAN
CTNNA1	CTNA1_HUMAN
CTNNA1	Q8N1C0_HUMAN
CTNNA2	CTNA2_HUMAN
CTNNA2	Q49AD3_HUMAN
CTNNAL1	CTNL1_HUMAN
CTNNAL1	Q5JTQ6_HUMAN
CTNNAL1	Q5JTQ9_HUMAN
CTNNB1	CTNB1_HUMAN
CTNND1	CTND1_HUMAN
CTNND1	Q68DU0_HUMAN
CTNND1	Q7KZJ3_HUMAN
CTNND1	Q96FS1_HUMAN
CTSB	CATB_HUMAN
CTSB	Q5HYG5_HUMAN
CTSB	Q6LAF9_HUMAN
CTSB	Q8TAC7_HUMAN
CTSD	CATD_HUMAN
CTSO	CATO_HUMAN
CTSZ	CATZ_HUMAN
CTSZ	Q5U000_HUMAN
CTTN	Q53HG7_HUMAN
CTTN	Q76MU0_HUMAN
CTTN	Q8N707_HUMAN
CTTN	Q96H99_HUMAN
CTTN	SRC8_HUMAN
CUL1	B3KTW0_HUMAN
CUL1	CUL1_HUMAN
CUL1	Q75MQ1_HUMAN
CUL3	CUL3_HUMAN
CUL3	Q53RD1_HUMAN
CUL3	Q53S54_HUMAN
CUL5	CUL5_HUMAN
CX3CR1	CX3C1_HUMAN
CXCL1	GROA_HUMAN
CXCL1	Q6LD34_HUMAN
CXCL10	CXL10_HUMAN
CXCL12	Q2L985_HUMAN
CXCL12	Q2L986_HUMAN
CXCL12	Q2L988_HUMAN
CXCL12	Q5IT36_HUMAN
CXCL12	Q6ICW0_HUMAN
CXCL12	Q8NF00_HUMAN
CXCL12	SDF1_HUMAN
CXCL13	CXL13_HUMAN
CXCL13	Q53X90_HUMAN
CXCL14	B3KQU8_HUMAN
CXCL14	CXL14_HUMAN
CXCL14	Q9NS21_HUMAN
CXCL2	CXCL2_HUMAN
CXCL2	Q6LD33_HUMAN
CXCL6	CXCL6_HUMAN
CXCR3	CXCR3_HUMAN
CYB5A	CYB5_HUMAN
CYB5A	Q59F44_HUMAN
CYB5A	Q9UML1_HUMAN
CYB5R3	NB5R3_HUMAN
CYB5R3	Q6TGM4_HUMAN
CYB5R3	Q6TGM5_HUMAN
CYB5R3	Q6ZVI6_HUMAN
CYBA	CY24A_HUMAN
CYCS	CYC_HUMAN
CYCS	Q6LER6_HUMAN
CYFIP2	CYFP2_HUMAN
CYFIP2	Q14650_HUMAN
CYFIP2	Q9H360_HUMAN
CYFIP2	Q9NSN1_HUMAN
CYLD	CYLD_HUMAN
CYP17A1	CP17A_HUMAN
CYP17A1	Q1HB44_HUMAN
CYP1A1	A0N0X8_HUMAN
CYP1A1	CP1A1_HUMAN
CYP1A1	Q0VHD5_HUMAN
CYP1A1	Q53G23_HUMAN
CYP1A1	Q5J9B1_HUMAN
CYP1A2	CP1A2_HUMAN
CYP1A2	Q6NWU3_HUMAN
CYP21A2	CP21A_HUMAN
CYP21A2	Q08AG9_HUMAN
CYP21A2	Q16741_HUMAN
CYP21A2	Q16742_HUMAN
CYP21A2	Q16746_HUMAN
CYP21A2	Q16748_HUMAN
CYP21A2	Q16874_HUMAN
CYP21A2	Q1EM51_HUMAN
CYP21A2	Q1EM52_HUMAN
CYP21A2	Q1EM53_HUMAN
CYP21A2	Q1H8Y2_HUMAN
CYP21A2	Q1H8Y3_HUMAN
CYP21A2	Q1H8Y4_HUMAN
CYP21A2	Q1H8Y5_HUMAN
CYP21A2	Q2UVX5_HUMAN
CYP21A2	Q2UVX6_HUMAN
CYP21A2	Q5ST44_HUMAN
CYP21A2	Q7KYP0_HUMAN
CYP21A2	Q7KZ07_HUMAN
CYP21A2	Q96NU8_HUMAN
CYP21A2	Q9UP07_HUMAN
CYP26A1	CP26A_HUMAN
CYP26A1	Q5VXH9_HUMAN
CYP27A1	CP27A_HUMAN
CYP2A6	CP2A6_HUMAN
CYP2A6	Q13120_HUMAN
CYP2A7	A6NE97_HUMAN
CYP2A7	CP2A7_HUMAN
CYP2A7	Q17RW7_HUMAN
CYP2B6	CP2B6_HUMAN
CYP2B6	Q6NWU1_HUMAN
CYP2B6	Q6NWU2_HUMAN
CYP2B6	Q9UNX8_HUMAN
CYP2B7P1	Q14097_HUMAN
CYP2C18	CP2CI_HUMAN
CYP2C18	Q16750_HUMAN
CYP2C18	Q2XN56_HUMAN
CYP2C18	Q4VAT5_HUMAN
CYP2C18	Q53EX9_HUMAN
CYP2C18	Q7Z348_HUMAN
CYP2C19	CP2CJ_HUMAN
CYP2C19	Q16743_HUMAN
CYP2C19	Q767A3_HUMAN
CYP2C8	CP2C8_HUMAN
CYP2C9	CP2C9_HUMAN
CYP2C9	Q5EDC5_HUMAN
CYP2C9	Q5VX92_HUMAN
CYP2C9	Q6IRV8_HUMAN
CYP2C9	Q8WW80_HUMAN
CYP2C9	Q9UEH3_HUMAN
CYP2C9	Q9UQ59_HUMAN
CYP2D6	CP2D6_HUMAN
CYP2D6	Q007T9_HUMAN
CYP2D6	Q16753_HUMAN
CYP2D6	Q16804_HUMAN
CYP2D6	Q2XND0_HUMAN
CYP2D6	Q2XND2_HUMAN
CYP2D6	Q2XND3_HUMAN
CYP2D6	Q2XND8_HUMAN
CYP2D6	Q38LF9_HUMAN
CYP2D6	Q38LG0_HUMAN
CYP2D6	Q38LG2_HUMAN
CYP2D6	Q3KPF3_HUMAN
CYP2D6	Q59FG8_HUMAN
CYP2D6	Q5Y7H2_HUMAN
CYP2D6	Q6ICD8_HUMAN
CYP2D6	Q6NWU0_HUMAN
CYP2D6	Q6NXU8_HUMAN
CYP2E1	CP2E1_HUMAN
CYP2E1	Q16868_HUMAN
CYP2E1	Q3YA63_HUMAN
CYP2E1	Q4LBD0_HUMAN
CYP2E1	Q573G9_HUMAN
CYP2E1	Q573H0_HUMAN
CYP2E1	Q59EW1_HUMAN
CYP2E1	Q6LER5_HUMAN
CYP2E1	Q6NWT7_HUMAN
CYP2E1	Q6NWT9_HUMAN
CYP2J2	CP2J2_HUMAN
CYP2J2	Q8TF13_HUMAN
CYP2J2	Q96RX4_HUMAN
CYP2J2	Q9UN91_HUMAN
CYP39A1	CP39A_HUMAN
CYP3A4	CP3A4_HUMAN
CYP3A4	Q6GRK0_HUMAN
CYP3A4	Q7Z448_HUMAN
CYP3A4	Q86SK2_HUMAN
CYP3A4	Q86SK3_HUMAN
CYP3A4	Q9BZM0_HUMAN
CYP3A43	CP343_HUMAN
CYP3A43	Q495Y0_HUMAN
CYP3A43	Q495Y1_HUMAN
CYP3A43	Q75MK2_HUMAN
CYP3A43	Q75MK3_HUMAN
CYP3A43	Q7Z2G5_HUMAN
CYP3A43	Q9HB50_HUMAN
CYP3A43	Q9HB51_HUMAN
CYP3A5	CP3A5_HUMAN
CYP3A5	Q14V85_HUMAN
CYP3A5	Q53GC3_HUMAN
CYP3A5	Q7Z3N0_HUMAN
CYP3A5	Q7Z446_HUMAN
CYP3A5	Q7Z447_HUMAN
CYP3A5	Q86SK1_HUMAN
CYP3A5	Q96RK6_HUMAN
CYP3A5	Q96RK8_HUMAN
CYP3A7	CP3A7_HUMAN
CYP3A7	Q6KGV3_HUMAN
CYP3A7	Q9H241_HUMAN
CYP4A11	CP4AB_HUMAN
CYP4A11	Q16802_HUMAN
CYP4B1	CP4B1_HUMAN
CYP4B1	Q8IZB0_HUMAN
CYP4B1	Q8WWV1_HUMAN
CYP4F12	CP4FC_HUMAN
CYP4F12	Q5JPJ7_HUMAN
CYP4F12	Q8IV39_HUMAN
CYP4F2	CP4F2_HUMAN
CYP4F3	CP4F3_HUMAN
CYP4V2	CP4V2_HUMAN
CYP4V2	Q49AA5_HUMAN
CYP4V2	Q6UWV9_HUMAN
CYP7B1	CP7B1_HUMAN
CYP7B1	Q05C57_HUMAN
CYP8B1	CP8B1_HUMAN
CYR61	CYR61_HUMAN
CYR61	Q53FA4_HUMAN
CYR61	Q6FI18_HUMAN
CYR61	Q9UID7_HUMAN
CYorf15A	C9JE90_HUMAN
CYorf15A	CY15A_HUMAN
CYorf15A	Q2TAN5_HUMAN
CYorf15A	Q6ZSJ5_HUMAN
CYorf15B	CY15B_HUMAN
CYorf15B	Q8N4A2_HUMAN
D4S234E	B2R5R8_HUMAN
D4S234E	NSG1_HUMAN
DAAM1	DAAM1_HUMAN
DAB2IP	DAB2P_HUMAN
DAB2IP	Q5VWQ7_HUMAN
DACH1	D0FY35_HUMAN
DACH1	D0FY36_HUMAN
DACH1	DACH1_HUMAN
DACT1	A8MYJ2_HUMAN
DACT1	DACT1_HUMAN
DACT1	Q5DM88_HUMAN
DAK	DHAK_HUMAN
DAK	Q2L9C1_HUMAN
DAK	Q9UFX5_HUMAN
DAO	OXDA_HUMAN
DAO	Q7Z312_HUMAN
DAP	DAP1_HUMAN
DAP	Q7KZT7_HUMAN
DAXX	B4E1C1_HUMAN
DAXX	DAXX_HUMAN
DAXX	Q4VX54_HUMAN
DAXX	Q53F85_HUMAN
DAXX	Q59FG7_HUMAN
DAXX	Q5STK9_HUMAN
DAXX	Q5STR5_HUMAN
DAZAP2	B4DDT5_HUMAN
DAZAP2	B4E1G3_HUMAN
DAZAP2	C9JA96_HUMAN
DAZAP2	C9JP84_HUMAN
DAZAP2	DAZP2_HUMAN
DBH	DOPO_HUMAN
DBT	ODB2_HUMAN
DBT	Q5VVL7_HUMAN
DCI	D3D2_HUMAN
DCI	Q96DC0_HUMAN
DCN	PGS2_HUMAN
DCN	Q6FH10_HUMAN
DCT	Q09GT4_HUMAN
DCT	Q0PK43_HUMAN
DCT	Q9NQD8_HUMAN
DCT	TYRP2_HUMAN
DCTD	DCTD_HUMAN
DCXR	DCXR_HUMAN
DDAH1	B1AKK2_HUMAN
DDAH1	B4E3V1_HUMAN
DDAH1	DDAH1_HUMAN
DDAH1	Q5HYC8_HUMAN
DDB1	DDB1_HUMAN
DDT	DOPD_HUMAN
DDT	Q53Y51_HUMAN
DDX1	A3RJH1_HUMAN
DDX1	DDX1_HUMAN
DDX3X	A8K538_HUMAN
DDX3X	DDX3X_HUMAN
DDX3X	Q59GX6_HUMAN
DDX3X	Q5S4N1_HUMAN
DDX3Y	DDX3Y_HUMAN
DDX42	DDX42_HUMAN
DECR1	DECR_HUMAN
DECR1	Q7LDK6_HUMAN
DECR2	DECR2_HUMAN
DECR2	Q4VXZ8_HUMAN
DECR2	Q9H3W9_HUMAN
DEF6	DEFI6_HUMAN
DENND4A	MYCPP_HUMAN
DENND4A	Q05C90_HUMAN
DEPDC7	DEPD7_HUMAN
DERA	DEOC_HUMAN
DES	DESM_HUMAN
DES	Q2PUK1_HUMAN
DES	Q45VM6_HUMAN
DES	Q45VM7_HUMAN
DES	Q45VM8_HUMAN
DES	Q53SB5_HUMAN
DES	Q549R7_HUMAN
DES	Q549R8_HUMAN
DES	Q549R9_HUMAN
DES	Q5RLN0_HUMAN
DES	Q5RLN1_HUMAN
DES	Q5RLN2_HUMAN
DES	Q9GZR6_HUMAN
DES	Q9H319_HUMAN
DFFA	DFFA_HUMAN
DFFA	Q53HN4_HUMAN
DFFA	Q5T6G6_HUMAN
DGAT2	DGAT2_HUMAN
DGKD	DGKD_HUMAN
DGKD	Q53SE4_HUMAN
DGKD	Q53SV4_HUMAN
DGKD	Q6ZNX6_HUMAN
DGKE	A1L4Q0_HUMAN
DGKE	DGKE_HUMAN
DGKE	Q59FU4_HUMAN
DGKE	Q8TBM4_HUMAN
DHFR	B0YJ76_HUMAN
DHFR	DYR_HUMAN
DHODH	PYRD_HUMAN
DHRS1	DHRS1_HUMAN
DHRS2	DHRS2_HUMAN
DHRS2	Q59F08_HUMAN
DHRS4	DHRS4_HUMAN
DHRS4	Q6E0Y0_HUMAN
DHTKD1	DHTK1_HUMAN
DHX35	DHX35_HUMAN
DHX35	Q5THR1_HUMAN
DHX9	DHX9_HUMAN
DHX9	Q05CI5_HUMAN
DHX9	Q12803_HUMAN
[truncated: 7,582 more rows]

## Sheet: HCC upregulation protein
Protein Acc	UniprotID	Genesymbol
NP_114111.2	ARM10_HUMAN	ARMC10
CLIC1_HUMAN	CLIC1_HUMAN	CLIC1
PPIA_HUMAN	PPIA_HUMAN	PPIA
SSX2_HUMAN	SSX2_HUMAN	SSX2
SSX4_HUMAN	SSX4_HUMAN	SSX4
TSPY1_HUMAN	TSPY1_HUMAN	TSPY1
UBD_HUMAN	UBD_HUMAN	UBD

## Sheet: HCC downregulation protein
Protein Acc	UniprotID	Genesymbol
NP_001032647.1	HEPN1_HUMAN	HEPN1
NP_689935.1	HECAM_HUMAN	HEPACAM

## Sheet: genetic variantion
Protein Acc	UniprotID
O00187	MASP2_HUMAN
O00206	TLR4_HUMAN
O14625	CXL11_HUMAN
O14965	STK6_HUMAN
O14977	AZIN1_HUMAN
O15217	GSTA4_HUMAN
O15392	BIRC5_HUMAN
O43252	PAPS1_HUMAN
O43542	XRCC3_HUMAN
O60333	KIF1B_HUMAN
O60603	TLR2_HUMAN
O75791	GRAP2_HUMAN
O95715	CXL14_HUMAN
O95999	BCL10_HUMAN
P00325	ADH1B_HUMAN
P00326	ADH1G_HUMAN
P00734	THRB_HUMAN
P01009	A1AT_HUMAN
P01019	ANGT_HUMAN
P01116	RASK_HUMAN
P01133	EGF_HUMAN
P01137	TGFB1_HUMAN
P01308	INS_HUMAN
P01344	IGF2_HUMAN
P01375	TNFA_HUMAN
P01579	IFNG_HUMAN
P01583	IL1A_HUMAN
P01584	IL1B_HUMAN
P01912	2B13_HUMAN
P02748	CO9_HUMAN
P02771	FETA_HUMAN
P02778	CXL10_HUMAN
P03372	ESR1_HUMAN
P04040	CATA_HUMAN
P04179	SODM_HUMAN
P04637	P53_HUMAN
P04798	CP1A1_HUMAN
P05019	IGF1_HUMAN
P05062	ALDOB_HUMAN
P05091	ALDH2_HUMAN
P05093	CP17A_HUMAN
P05112	IL4_HUMAN
P05164	PERM_HUMAN
P05177	CP1A2_HUMAN
P05181	CP2E1_HUMAN
P05231	IL6_HUMAN
P06400	RB_HUMAN
P06681	CO2_HUMAN
P06756	ITAV_HUMAN
P07099	HYEP_HUMAN
P08069	IGF1R_HUMAN
P08107	HSP71_HUMAN
P08123	CO1A2_HUMAN
P08183	MDR1_HUMAN
P08253	MMP2_HUMAN
P08263	GSTA1_HUMAN
P08670	VIME_HUMAN
P08684	CP3A4_HUMAN
P09211	GSTP1_HUMAN
P09237	MMP7_HUMAN
P09486	SPRC_HUMAN
P09488	GSTM1_HUMAN
P0CG30	GSTT2_HUMAN
P10145	IL8_HUMAN
P10275	ANDR_HUMAN
P10620	MGST1_HUMAN
P10635	CP2D6_HUMAN
P11021	GRP78_HUMAN
P11166	GTR1_HUMAN
P11226	MBL2_HUMAN
P11245	ARY2_HUMAN
P11473	VDR_HUMAN
P11509	CP2A6_HUMAN
P11511	CP19A_HUMAN
P11717	MPRI_HUMAN
P12259	FA5_HUMAN
P12524	MYCL1_HUMAN
P12830	CADH1_HUMAN
P13500	CCL2_HUMAN
P13501	CCL5_HUMAN
P14780	MMP9_HUMAN
P14784	IL2RB_HUMAN
P15056	BRAF_HUMAN
P15692	VEGFA_HUMAN
P16278	BGAL_HUMAN
P16410	CTLA4_HUMAN
P17181	INAR1_HUMAN
P17936	IBP3_HUMAN
P18074	ERCC2_HUMAN
P18440	ARY1_HUMAN
P18510	IL1RA_HUMAN
P18887	XRCC1_HUMAN
P19838	NFKB1_HUMAN
P20591	MX1_HUMAN
P20823	HNF1A_HUMAN
P21266	GSTM3_HUMAN
P21964	COMT_HUMAN
P22301	IL10_HUMAN
P22455	FGFR4_HUMAN
P22894	MMP8_HUMAN
P24385	CCND1_HUMAN
P25054	APC_HUMAN
P25063	CD24_HUMAN
P25445	TNR6_HUMAN
P25963	IKBA_HUMAN
P28161	GSTM2_HUMAN
P28906	CD34_HUMAN
P30711	GSTT1_HUMAN
P31213	S5A2_HUMAN
P33261	CP2CJ_HUMAN
P33527	MRP1_HUMAN
P33681	CD80_HUMAN
P33993	MCM7_HUMAN
P34913	HYES_HUMAN
P35222	CTNB1_HUMAN
P35354	PGH2_HUMAN
P35442	TSP2_HUMAN
P35443	TSP4_HUMAN
P37173	TGFR2_HUMAN
P39060	COIA1_HUMAN
P39748	FEN1_HUMAN
P40305	IFI27_HUMAN
P40692	MLH1_HUMAN
P40763	STAT3_HUMAN
P41181	AQP2_HUMAN
P41597	CCR2_HUMAN
P42229	STA5A_HUMAN
P42336	PK3CA_HUMAN
P42701	I12R1_HUMAN
P42898	MTHR_HUMAN
P43246	MSH2_HUMAN
P46527	CDN1B_HUMAN
P48023	TNFL6_HUMAN
P48061	SDF1_HUMAN
P48551	INAR2_HUMAN
P50281	MMP14_HUMAN
P51681	CCR5_HUMAN
P54274	TERF1_HUMAN
P57678	GEMI4_HUMAN
P59780	AP3S2_HUMAN
P60033	CD81_HUMAN
P61073	CXCR4_HUMAN
P78417	GSTO1_HUMAN
P80297	MT1X_HUMAN
Q00987	MDM2_HUMAN
Q01831	XPC_HUMAN
Q07869	PPARA_HUMAN
Q08830	FGL1_HUMAN
Q12923	PTN13_HUMAN
Q13324	CRFR2_HUMAN
Q13478	IL18R_HUMAN
Q13635	PTC1_HUMAN
Q14005	IL16_HUMAN
Q14116	IL18_HUMAN
Q14749	GNMT_HUMAN
Q14767	LTBP2_HUMAN
Q15303	ERBB4_HUMAN
Q15485	FCN2_HUMAN
Q15554	TERF2_HUMAN
Q16665	HIF1A_HUMAN
Q16678	CP1B1_HUMAN
Q29983	MICA_HUMAN
Q30201	HFE_HUMAN
Q6XPS3	TPTE2_HUMAN
Q8IZI9	IL28B_HUMAN
Q8N119	MMP21_HUMAN
Q92844	TANK_HUMAN
Q969S8	HDA10_HUMAN
Q96QB1	RHG07_HUMAN
Q99741	CDC6_HUMAN
Q9BUY7	EFC11_HUMAN
Q9BX93	PG12B_HUMAN
Q9BYV9	BACH2_HUMAN
Q9H4Y5	GSTO2_HUMAN
Q9H7B4	SMYD3_HUMAN
Q9HAW7	UD17_HUMAN
Q9NQB0	TF7L2_HUMAN
Q9NR96	TLR9_HUMAN
Q9NS23	RASF1_HUMAN
Q9NST1	PLPL3_HUMAN
Q9NVP1	DDX18_HUMAN
Q9NZQ8	TRPM5_HUMAN
Q9UBC3	DNM3B_HUMAN
Q9UIF7	MUTYH_HUMAN
Q9UQ84	EXO1_HUMAN
Q9Y297	FBW1A_HUMAN
Q9Y2K9	STB5L_HUMAN
Q9Y6J0	CABIN_HUMAN
