# Supplementary material for: Identification of AKT kinases as unfavorable prognostic factors for hepatocellular carcinoma by a combination of expression profile, interaction network analysis and clinical validation
Source: Royal Society of Chemistry journal article supplement (doi:10.1039/c3mb70400a), 2013-10-14
Supplement: c3mb70400a_3.xlsx [file c3mb70400a_3.xlsx]

## Sheet: PPI network for HCC proteins
Node A	Node B
1433B_HUMAN	1433G_HUMAN
1433B_HUMAN	1433T_HUMAN
1433B_HUMAN	1433Z_HUMAN
1433B_HUMAN	143EE_HUMAN
1433B_HUMAN	3BP5L_HUMAN
1433B_HUMAN	ACINU_HUMAN
1433B_HUMAN	AFAD_HUMAN
1433B_HUMAN	AKP13_HUMAN
1433B_HUMAN	AKT1_HUMAN
1433B_HUMAN	ALS2_HUMAN
1433B_HUMAN	ANM5_HUMAN
1433B_HUMAN	ATPA_HUMAN
1433B_HUMAN	B2CL1_HUMAN
1433B_HUMAN	BAD_HUMAN
1433B_HUMAN	BCL2_HUMAN
1433B_HUMAN	BCLX_HUMAN
1433B_HUMAN	BCR_HUMAN
1433B_HUMAN	BRAF1_HUMAN
1433B_HUMAN	C1QBP_HUMAN
1433B_HUMAN	CANB1_HUMAN
1433B_HUMAN	CING_HUMAN
1433B_HUMAN	CRK_HUMAN
1433B_HUMAN	CRNL1_HUMAN
1433B_HUMAN	CRTC2_HUMAN
1433B_HUMAN	CSK21_HUMAN
1433B_HUMAN	CV009_HUMAN
1433B_HUMAN	CWC22_HUMAN
1433B_HUMAN	DAPK1_HUMAN
1433B_HUMAN	DFFA_HUMAN
1433B_HUMAN	DHX15_HUMAN
1433B_HUMAN	DOCK4_HUMAN
1433B_HUMAN	DYR1A_HUMAN
1433B_HUMAN	E41L2_HUMAN
1433B_HUMAN	E41L3_HUMAN
1433B_HUMAN	EDC3_HUMAN
1433B_HUMAN	EDNRA_HUMAN
1433B_HUMAN	EGFR_HUMAN
1433B_HUMAN	EGF_HUMAN
1433B_HUMAN	FRMD6_HUMAN
1433B_HUMAN	FRS2_HUMAN
1433B_HUMAN	FRYL_HUMAN
1433B_HUMAN	GAPD1_HUMAN
1433B_HUMAN	GBF1_HUMAN
1433B_HUMAN	GRB2_HUMAN
1433B_HUMAN	GRP78_HUMAN
1433B_HUMAN	HDAC5_HUMAN
1433B_HUMAN	HECD1_HUMAN
1433B_HUMAN	HS90A_HUMAN
1433B_HUMAN	HS90B_HUMAN
1433B_HUMAN	HSP71_HUMAN
1433B_HUMAN	HSP74_HUMAN
1433B_HUMAN	INSR_HUMAN
1433B_HUMAN	IRS1_HUMAN
1433B_HUMAN	IRS2_HUMAN
1433B_HUMAN	ISCU_HUMAN
1433B_HUMAN	ITB1_HUMAN
1433B_HUMAN	K0415_HUMAN
1433B_HUMAN	K1C18_HUMAN
1433B_HUMAN	KCNK3_HUMAN
1433B_HUMAN	KDIS_HUMAN
1433B_HUMAN	KI20B_HUMAN
1433B_HUMAN	KIF1C_HUMAN
1433B_HUMAN	KIF23_HUMAN
1433B_HUMAN	KINH_HUMAN
1433B_HUMAN	KLC1_HUMAN
1433B_HUMAN	KLC4_HUMAN
1433B_HUMAN	KPCZ_HUMAN
1433B_HUMAN	KS6A1_HUMAN
1433B_HUMAN	LARP1_HUMAN
1433B_HUMAN	LBR_HUMAN
1433B_HUMAN	LIPB1_HUMAN
1433B_HUMAN	LSR_HUMAN
1433B_HUMAN	LYST_HUMAN
1433B_HUMAN	M3K2_HUMAN
1433B_HUMAN	M3KL4_HUMAN
1433B_HUMAN	MARK3_HUMAN
1433B_HUMAN	MDM4_HUMAN
1433B_HUMAN	MEP50_HUMAN
1433B_HUMAN	MILK1_HUMAN
1433B_HUMAN	MK01_HUMAN
1433B_HUMAN	MK03_HUMAN
1433B_HUMAN	MK07_HUMAN
1433B_HUMAN	MP2K2_HUMAN
1433B_HUMAN	MP2K5_HUMAN
1433B_HUMAN	MPRIP_HUMAN
1433B_HUMAN	MYCB2_HUMAN
1433B_HUMAN	MYCPP_HUMAN
1433B_HUMAN	NCKP1_HUMAN
1433B_HUMAN	NGF_HUMAN
1433B_HUMAN	NTRK1_HUMAN
1433B_HUMAN	OSBL3_HUMAN
1433B_HUMAN	OTU7B_HUMAN
1433B_HUMAN	P85B_HUMAN
1433B_HUMAN	PAK4_HUMAN
1433B_HUMAN	PARD3_HUMAN
1433B_HUMAN	PDE3B_HUMAN
1433B_HUMAN	PDRG1_HUMAN
1433B_HUMAN	PI3R4_HUMAN
1433B_HUMAN	PI4KB_HUMAN
1433B_HUMAN	PP2BC_HUMAN
1433B_HUMAN	PRKDC_HUMAN
1433B_HUMAN	PTN3_HUMAN
1433B_HUMAN	PYRG1_HUMAN
1433B_HUMAN	Q8IXP7_HUMAN
1433B_HUMAN	Q8WUM6_HUMAN
1433B_HUMAN	Q96G51_HUMAN
1433B_HUMAN	RABX5_HUMAN
1433B_HUMAN	RADIL_HUMAN
1433B_HUMAN	RAI14_HUMAN
1433B_HUMAN	RAP1A_HUMAN
1433B_HUMAN	RASH_HUMAN
1433B_HUMAN	RASK_HUMAN
1433B_HUMAN	RASN_HUMAN
1433B_HUMAN	RGAP1_HUMAN
1433B_HUMAN	RGPS2_HUMAN
1433B_HUMAN	RGS3_HUMAN
1433B_HUMAN	RGS7_HUMAN
1433B_HUMAN	RIOK1_HUMAN
1433B_HUMAN	RIT1_HUMAN
1433B_HUMAN	RIT2_HUMAN
1433B_HUMAN	RMD3_HUMAN
1433B_HUMAN	RNPS1_HUMAN
1433B_HUMAN	RPGF1_HUMAN
1433B_HUMAN	S4A7_HUMAN
1433B_HUMAN	SAP18_HUMAN
1433B_HUMAN	SF13A_HUMAN
1433B_HUMAN	SFRS3_HUMAN
1433B_HUMAN	SH3B4_HUMAN
1433B_HUMAN	SHC1_HUMAN
1433B_HUMAN	SL9A1_HUMAN
1433B_HUMAN	SMAG2_HUMAN
1433B_HUMAN	SON_HUMAN
1433B_HUMAN	SOS1_HUMAN
1433B_HUMAN	SRC_HUMAN
1433B_HUMAN	SRPK1_HUMAN
1433B_HUMAN	SRRM2_HUMAN
1433B_HUMAN	ST38L_HUMAN
1433B_HUMAN	STK38_HUMAN
1433B_HUMAN	SYUA_HUMAN
1433B_HUMAN	TAU_HUMAN
1433B_HUMAN	TBA1A_HUMAN
1433B_HUMAN	TBB5_HUMAN
1433B_HUMAN	TESK1_HUMAN
1433B_HUMAN	TESK2_HUMAN
1433B_HUMAN	TNAP3_HUMAN
1433B_HUMAN	TSC1_HUMAN
1433B_HUMAN	TSC2_HUMAN
1433B_HUMAN	TTP_HUMAN
1433B_HUMAN	U520_HUMAN
1433B_HUMAN	U5S1_HUMAN
1433B_HUMAN	UBIQ_HUMAN
1433B_HUMAN	UBP8_HUMAN
1433B_HUMAN	UCP2_HUMAN
1433B_HUMAN	UCP3_HUMAN
1433B_HUMAN	WDR6_HUMAN
1433B_HUMAN	WEE1_HUMAN
1433B_HUMAN	ZO2_HUMAN
1433E_HUMAN	1433G_HUMAN
1433E_HUMAN	2AAA_HUMAN
1433E_HUMAN	ACTZ_HUMAN
1433E_HUMAN	AKAP9_HUMAN
1433E_HUMAN	ALMS1_HUMAN
1433E_HUMAN	AZI1_HUMAN
1433E_HUMAN	BAD_HUMAN
1433E_HUMAN	BEX3_HUMAN
1433E_HUMAN	CALM_HUMAN
1433E_HUMAN	CASP2_HUMAN
1433E_HUMAN	CDC2_HUMAN
1433E_HUMAN	CDN1B_HUMAN
1433E_HUMAN	CE110_HUMAN
1433E_HUMAN	CE152_HUMAN
1433E_HUMAN	CE164_HUMAN
1433E_HUMAN	CE192_HUMAN
1433E_HUMAN	CE290_HUMAN
1433E_HUMAN	CENPJ_HUMAN
1433E_HUMAN	CEP41_HUMAN
1433E_HUMAN	CEP57_HUMAN
1433E_HUMAN	CEP63_HUMAN
1433E_HUMAN	CEP70_HUMAN
1433E_HUMAN	CEP72_HUMAN
1433E_HUMAN	CEP76_HUMAN
1433E_HUMAN	CEP78_HUMAN
1433E_HUMAN	CETN2_HUMAN
1433E_HUMAN	CK5P2_HUMAN
1433E_HUMAN	CKAP5_HUMAN
1433E_HUMAN	CLAP1_HUMAN
1433E_HUMAN	CP110_HUMAN
1433E_HUMAN	CP135_HUMAN
1433E_HUMAN	CP250_HUMAN
1433E_HUMAN	CT043_HUMAN
1433E_HUMAN	DC1I2_HUMAN
1433E_HUMAN	DCTN1_HUMAN
1433E_HUMAN	DCTN2_HUMAN
1433E_HUMAN	DCTN3_HUMAN
1433E_HUMAN	DISC1_HUMAN
1433E_HUMAN	DYHC1_HUMAN
1433E_HUMAN	DYL1_HUMAN
1433E_HUMAN	DYR1A_HUMAN
1433E_HUMAN	FR1OP_HUMAN
1433E_HUMAN	GCP2_HUMAN
1433E_HUMAN	GCP3_HUMAN
1433E_HUMAN	GCP4_HUMAN
1433E_HUMAN	GCP5_HUMAN
1433E_HUMAN	GCP6_HUMAN
1433E_HUMAN	GNRP_HUMAN
1433E_HUMAN	GRAP2_HUMAN
1433E_HUMAN	GRIN2_HUMAN
1433E_HUMAN	HAUS2_HUMAN
1433E_HUMAN	HDAC4_HUMAN
1433E_HUMAN	HDAC5_HUMAN
1433E_HUMAN	HS90A_HUMAN
1433E_HUMAN	IGF1R_HUMAN
1433E_HUMAN	IRS1_HUMAN
1433E_HUMAN	IRS2_HUMAN
1433E_HUMAN	K1C18_HUMAN
1433E_HUMAN	KAP3_HUMAN
1433E_HUMAN	KAPCA_HUMAN
1433E_HUMAN	KC1D_HUMAN
1433E_HUMAN	KC1E_HUMAN
1433E_HUMAN	KCNH2_HUMAN
1433E_HUMAN	KIF1C_HUMAN
1433E_HUMAN	LIS1_HUMAN
1433E_HUMAN	M3K10_HUMAN
1433E_HUMAN	MARE1_HUMAN
1433E_HUMAN	MDM4_HUMAN
1433E_HUMAN	NADE_HUMAN
1433E_HUMAN	NDE1_HUMAN
1433E_HUMAN	NEDD1_HUMAN
1433E_HUMAN	NEK2_HUMAN
1433E_HUMAN	NGF_HUMAN
1433E_HUMAN	NINL_HUMAN
1433E_HUMAN	O60592_HUMAN
1433E_HUMAN	ODFP2_HUMAN
1433E_HUMAN	OFD1_HUMAN
1433E_HUMAN	PCM1_HUMAN
1433E_HUMAN	PCNT_HUMAN
1433E_HUMAN	PCTK1_HUMAN
1433E_HUMAN	PFTK1_HUMAN
1433E_HUMAN	PLK1_HUMAN
1433E_HUMAN	PLK4_HUMAN
1433E_HUMAN	Q6FHA6_HUMAN
1433E_HUMAN	Q8IVE1_HUMAN
1433E_HUMAN	Q8TAR7_HUMAN
1433E_HUMAN	Q969U2_HUMAN
1433E_HUMAN	Q96C01_HUMAN
1433E_HUMAN	Q9BRD5_HUMAN
1433E_HUMAN	Q9HAF7_HUMAN
1433E_HUMAN	Q9NWB7_HUMAN
1433E_HUMAN	RAF1_HUMAN
1433E_HUMAN	RGS3_HUMAN
1433E_HUMAN	RIN1_HUMAN
1433E_HUMAN	SDCG8_HUMAN
1433E_HUMAN	SFI1_HUMAN
1433E_HUMAN	SRBS2_HUMAN
1433E_HUMAN	SRC_HUMAN
1433E_HUMAN	SSNA1_HUMAN
1433E_HUMAN	SYUA_HUMAN
1433E_HUMAN	TBA1A_HUMAN
1433E_HUMAN	TBA4A_HUMAN
1433E_HUMAN	TBB2C_HUMAN
1433E_HUMAN	TBB4_HUMAN
1433E_HUMAN	TBB5_HUMAN
1433E_HUMAN	TBG1_HUMAN
1433E_HUMAN	TBG2_HUMAN
1433E_HUMAN	TBP_HUMAN
1433E_HUMAN	TFDP2_HUMAN
1433E_HUMAN	TGFB1_HUMAN
1433E_HUMAN	TNAP3_HUMAN
1433E_HUMAN	TNR16_HUMAN
1433E_HUMAN	TOP2A_HUMAN
1433E_HUMAN	TSC1_HUMAN
1433E_HUMAN	TSC2_HUMAN
1433E_HUMAN	U334_HUMAN
1433E_HUMAN	WWTR1_HUMAN
1433E_HUMAN	Y0514_HUMAN
1433F_HUMAN	1433B_HUMAN
1433F_HUMAN	1433G_HUMAN
1433F_HUMAN	1433T_HUMAN
1433F_HUMAN	1433Z_HUMAN
1433F_HUMAN	143EE_HUMAN
1433F_HUMAN	ABLM1_HUMAN
1433F_HUMAN	ACHA4_HUMAN
1433F_HUMAN	ADT3_HUMAN
1433F_HUMAN	AFAD_HUMAN
1433F_HUMAN	AKTS1_HUMAN
1433F_HUMAN	ARAF_HUMAN
1433F_HUMAN	ARHG2_HUMAN
1433F_HUMAN	ASPP2_HUMAN
1433F_HUMAN	BAD_HUMAN
1433F_HUMAN	BAIP2_HUMAN
1433F_HUMAN	BCAR1_HUMAN
1433F_HUMAN	BRAF1_HUMAN
1433F_HUMAN	C1QBP_HUMAN
1433F_HUMAN	CBP_HUMAN
1433F_HUMAN	CCND3_HUMAN
1433F_HUMAN	CDC7_HUMAN
1433F_HUMAN	CDK18_HUMAN
1433F_HUMAN	CDN1B_HUMAN
1433F_HUMAN	CHK1_HUMAN
1433F_HUMAN	CING_HUMAN
1433F_HUMAN	CLAP1_HUMAN
1433F_HUMAN	CLAP2_HUMAN
1433F_HUMAN	CP250_HUMAN
1433F_HUMAN	CP4F2_HUMAN
1433F_HUMAN	CRTC1_HUMAN
1433F_HUMAN	CYFP1_HUMAN
1433F_HUMAN	CYFP2_HUMAN
1433F_HUMAN	DCAF7_HUMAN
1433F_HUMAN	DOCK7_HUMAN
1433F_HUMAN	DRD4_HUMAN
1433F_HUMAN	E41L3_HUMAN
1433F_HUMAN	EDNRA_HUMAN
1433F_HUMAN	ESR1_HUMAN
1433F_HUMAN	ESR2_HUMAN
1433F_HUMAN	F262_HUMAN
1433F_HUMAN	FA53C_HUMAN
1433F_HUMAN	FNBP2_HUMAN
1433F_HUMAN	FOXO3_HUMAN
1433F_HUMAN	GCR_HUMAN
1433F_HUMAN	GRDN_HUMAN
1433F_HUMAN	HDAC4_HUMAN
1433F_HUMAN	HDAC5_HUMAN
1433F_HUMAN	HDAC7_HUMAN
1433F_HUMAN	HSP74_HUMAN
1433F_HUMAN	HSP7C_HUMAN
1433F_HUMAN	HTRA1_HUMAN
1433F_HUMAN	IF4E2_HUMAN
1433F_HUMAN	IRS2_HUMAN
1433F_HUMAN	JUN_HUMAN
1433F_HUMAN	K1C18_HUMAN
1433F_HUMAN	KC1A_HUMAN
1433F_HUMAN	KC1E_HUMAN
1433F_HUMAN	KCC1A_HUMAN
1433F_HUMAN	KCC2G_HUMAN
1433F_HUMAN	KCC4_HUMAN
1433F_HUMAN	KCNH2_HUMAN
1433F_HUMAN	KCRB_HUMAN
1433F_HUMAN	KIF1B_HUMAN
1433F_HUMAN	KIF1C_HUMAN
1433F_HUMAN	KIF23_HUMAN
1433F_HUMAN	KINH_HUMAN
1433F_HUMAN	KKCC1_HUMAN
1433F_HUMAN	KLC1_HUMAN
1433F_HUMAN	KLC2_HUMAN
1433F_HUMAN	KLC3_HUMAN
1433F_HUMAN	KLC4_HUMAN
1433F_HUMAN	KSR1_HUMAN
1433F_HUMAN	LARP1_HUMAN
1433F_HUMAN	LIMA1_HUMAN
1433F_HUMAN	LMO7_HUMAN
1433F_HUMAN	LSR_HUMAN
1433F_HUMAN	M3K2_HUMAN
1433F_HUMAN	MARK1_HUMAN
1433F_HUMAN	MARK3_HUMAN
1433F_HUMAN	MAST2_HUMAN
1433F_HUMAN	MAST3_HUMAN
1433F_HUMAN	MDM4_HUMAN
1433F_HUMAN	MP2K5_HUMAN
1433F_HUMAN	MPIP3_HUMAN
1433F_HUMAN	MSHR_HUMAN
1433F_HUMAN	MYCPP_HUMAN
1433F_HUMAN	NADK_HUMAN
1433F_HUMAN	NCOA1_HUMAN
1433F_HUMAN	NCOA2_HUMAN
1433F_HUMAN	NCOA3_HUMAN
1433F_HUMAN	NEK1_HUMAN
1433F_HUMAN	NP1L1_HUMAN
1433F_HUMAN	NR1I3_HUMAN
1433F_HUMAN	NRIP1_HUMAN
1433F_HUMAN	OSBL3_HUMAN
1433F_HUMAN	PAK4_HUMAN
1433F_HUMAN	PAR6A_HUMAN
1433F_HUMAN	PCTK1_HUMAN
1433F_HUMAN	PDK1_HUMAN
1433F_HUMAN	PDPK1_HUMAN
1433F_HUMAN	PDRG1_HUMAN
1433F_HUMAN	PDZ11_HUMAN
1433F_HUMAN	PKP2_HUMAN
1433F_HUMAN	PLK3_HUMAN
1433F_HUMAN	PO3F1_HUMAN
1433F_HUMAN	PPRB_HUMAN
1433F_HUMAN	PTH1R_HUMAN
1433F_HUMAN	PTHR1_HUMAN
1433F_HUMAN	PTN14_HUMAN
1433F_HUMAN	Q71U35_HUMAN
1433F_HUMAN	Q8NAL1_HUMAN
1433F_HUMAN	RABE1_HUMAN
1433F_HUMAN	RASF8_HUMAN
1433F_HUMAN	REEP1_HUMAN
1433F_HUMAN	RFC4_HUMAN
1433F_HUMAN	RFIP1_HUMAN
1433F_HUMAN	RFIP2_HUMAN
1433F_HUMAN	RIMS2_HUMAN
1433F_HUMAN	S5A1_HUMAN
1433F_HUMAN	SHRM2_HUMAN
1433F_HUMAN	SRC_HUMAN
1433F_HUMAN	TBB2_HUMAN
1433F_HUMAN	TBB4_HUMAN
1433F_HUMAN	TBCD1_HUMAN
1433F_HUMAN	TBCD4_HUMAN
1433F_HUMAN	TBG1_HUMAN
1433F_HUMAN	THA_HUMAN
1433F_HUMAN	TIAM1_HUMAN
1433F_HUMAN	TISD_HUMAN
1433F_HUMAN	TLX2_HUMAN
1433F_HUMAN	TNAP3_HUMAN
1433F_HUMAN	TPH1_HUMAN
1433F_HUMAN	TRIPB_HUMAN
1433F_HUMAN	TSC1_HUMAN
1433F_HUMAN	TSC2_HUMAN
1433F_HUMAN	TTP_HUMAN
1433F_HUMAN	UBE2S_HUMAN
1433F_HUMAN	UBP8_HUMAN
1433F_HUMAN	VAMP8_HUMAN
1433F_HUMAN	WWP1_HUMAN
1433G_HUMAN	1433T_HUMAN
1433G_HUMAN	1433Z_HUMAN
1433G_HUMAN	143EE_HUMAN
1433G_HUMAN	2AAA_HUMAN
1433G_HUMAN	3BP5L_HUMAN
1433G_HUMAN	41_HUMAN
1433G_HUMAN	ACINU_HUMAN
1433G_HUMAN	ACTZ_HUMAN
1433G_HUMAN	AFAD_HUMAN
1433G_HUMAN	AKAP9_HUMAN
1433G_HUMAN	AKP13_HUMAN
1433G_HUMAN	ALBU_HUMAN
1433G_HUMAN	ALMS1_HUMAN
1433G_HUMAN	ANKS1_HUMAN
1433G_HUMAN	ANS1A_HUMAN
1433G_HUMAN	ARAF_HUMAN
1433G_HUMAN	ARHG2_HUMAN
1433G_HUMAN	ARHG7_HUMAN
1433G_HUMAN	ARHGG_HUMAN
1433G_HUMAN	ATPA_HUMAN
1433G_HUMAN	ATPB_HUMAN
1433G_HUMAN	AZI1_HUMAN
1433G_HUMAN	BAIP2_HUMAN
1433G_HUMAN	BCLF1_HUMAN
1433G_HUMAN	BRAF1_HUMAN
1433G_HUMAN	C1QBP_HUMAN
1433G_HUMAN	CALM_HUMAN
1433G_HUMAN	CAMP2_HUMAN
1433G_HUMAN	CCNB1_HUMAN
1433G_HUMAN	CCNB2_HUMAN
1433G_HUMAN	CCNY_HUMAN
1433G_HUMAN	CDC2_HUMAN
1433G_HUMAN	CDC5L_HUMAN
1433G_HUMAN	CDK16_HUMAN
1433G_HUMAN	CDK17_HUMAN
1433G_HUMAN	CDN1B_HUMAN
1433G_HUMAN	CE110_HUMAN
1433G_HUMAN	CE152_HUMAN
1433G_HUMAN	CE164_HUMAN
1433G_HUMAN	CE192_HUMAN
1433G_HUMAN	CE290_HUMAN
1433G_HUMAN	CENPJ_HUMAN
1433G_HUMAN	CEP41_HUMAN
1433G_HUMAN	CEP57_HUMAN
1433G_HUMAN	CEP63_HUMAN
1433G_HUMAN	CEP70_HUMAN
1433G_HUMAN	CEP72_HUMAN
1433G_HUMAN	CEP76_HUMAN
1433G_HUMAN	CEP78_HUMAN
1433G_HUMAN	CETN2_HUMAN
1433G_HUMAN	CFP1_HUMAN
1433G_HUMAN	CING_HUMAN
1433G_HUMAN	CK5P2_HUMAN
1433G_HUMAN	CKAP5_HUMAN
1433G_HUMAN	CL002_HUMAN
1433G_HUMAN	CLAP1_HUMAN
1433G_HUMAN	CLK1_HUMAN
1433G_HUMAN	CLK2_HUMAN
1433G_HUMAN	CLK3_HUMAN
1433G_HUMAN	COF1_HUMAN
1433G_HUMAN	CP080_HUMAN
1433G_HUMAN	CP110_HUMAN
1433G_HUMAN	CP135_HUMAN
1433G_HUMAN	CP250_HUMAN
1433G_HUMAN	CRTC2_HUMAN
1433G_HUMAN	CRYAB_HUMAN
1433G_HUMAN	CSE1_HUMAN
1433G_HUMAN	CV009_HUMAN
1433G_HUMAN	CYFP1_HUMAN
1433G_HUMAN	DC1I2_HUMAN
1433G_HUMAN	DCAF7_HUMAN
1433G_HUMAN	DCTN1_HUMAN
1433G_HUMAN	DCTN2_HUMAN
1433G_HUMAN	DCTN3_HUMAN
1433G_HUMAN	DDX48_HUMAN
1433G_HUMAN	DDX5_HUMAN
1433G_HUMAN	DFFA_HUMAN
1433G_HUMAN	DHX15_HUMAN
1433G_HUMAN	DISC1_HUMAN
1433G_HUMAN	DOCK7_HUMAN
1433G_HUMAN	DPOLZ_HUMAN
1433G_HUMAN	DYHC1_HUMAN
1433G_HUMAN	DYL1_HUMAN
1433G_HUMAN	DYR1A_HUMAN
1433G_HUMAN	E41L2_HUMAN
1433G_HUMAN	EDC3_HUMAN
1433G_HUMAN	EF1G_HUMAN
1433G_HUMAN	EMAL3_HUMAN
1433G_HUMAN	F262_HUMAN
1433G_HUMAN	FNBP2_HUMAN
1433G_HUMAN	FNBP3_HUMAN
1433G_HUMAN	FOXO1_HUMAN
1433G_HUMAN	FR1OP_HUMAN
1433G_HUMAN	FRMD6_HUMAN
1433G_HUMAN	FRYL_HUMAN
1433G_HUMAN	FRY_HUMAN
1433G_HUMAN	FUSIP_HUMAN
1433G_HUMAN	GBF1_HUMAN
1433G_HUMAN	GCP2_HUMAN
1433G_HUMAN	GCP3_HUMAN
1433G_HUMAN	GCP4_HUMAN
1433G_HUMAN	GCP5_HUMAN
1433G_HUMAN	GCP6_HUMAN
1433G_HUMAN	GRP75_HUMAN
1433G_HUMAN	GSK3A_HUMAN
1433G_HUMAN	HAUS2_HUMAN
1433G_HUMAN	HDAC4_HUMAN
1433G_HUMAN	HDAC7_HUMAN
1433G_HUMAN	HNRCL_HUMAN
1433G_HUMAN	HNRH1_HUMAN
1433G_HUMAN	HS90A_HUMAN
1433G_HUMAN	HSP71_HUMAN
1433G_HUMAN	HSP74_HUMAN
1433G_HUMAN	IF4A3_HUMAN
1433G_HUMAN	IGF1R_HUMAN
1433G_HUMAN	IRS2_HUMAN
1433G_HUMAN	K0408_HUMAN
1433G_HUMAN	K1C18_HUMAN
1433G_HUMAN	K1H1_HUMAN
1433G_HUMAN	KAP3_HUMAN
1433G_HUMAN	KAPCA_HUMAN
1433G_HUMAN	KC1D_HUMAN
1433G_HUMAN	KC1E_HUMAN
1433G_HUMAN	KIF1B_HUMAN
1433G_HUMAN	KIF1C_HUMAN
1433G_HUMAN	KIF23_HUMAN
1433G_HUMAN	KIF5C_HUMAN
1433G_HUMAN	KINH_HUMAN
1433G_HUMAN	KLC1_HUMAN
1433G_HUMAN	KLC2_HUMAN
1433G_HUMAN	KLC4_HUMAN
1433G_HUMAN	KPCA_HUMAN
1433G_HUMAN	KPCB_HUMAN
1433G_HUMAN	KPCD_HUMAN
1433G_HUMAN	KPCG_HUMAN
1433G_HUMAN	KPCT_HUMAN
1433G_HUMAN	KR195_HUMAN
1433G_HUMAN	KRT34_HUMAN
1433G_HUMAN	KRT37_HUMAN
1433G_HUMAN	KRT38_HUMAN
1433G_HUMAN	KRT82_HUMAN
1433G_HUMAN	KRT85_HUMAN
1433G_HUMAN	KT33B_HUMAN
1433G_HUMAN	LARP1_HUMAN
1433G_HUMAN	LBC_HUMAN
1433G_HUMAN	LBR_HUMAN
1433G_HUMAN	LC7L2_HUMAN
1433G_HUMAN	LC7L3_HUMAN
1433G_HUMAN	LIPB1_HUMAN
1433G_HUMAN	LIS1_HUMAN
1433G_HUMAN	LRP1_HUMAN
1433G_HUMAN	LSR_HUMAN
1433G_HUMAN	M3K2_HUMAN
1433G_HUMAN	MA32_HUMAN
1433G_HUMAN	MARE1_HUMAN
1433G_HUMAN	MARK1_HUMAN
1433G_HUMAN	MARK3_HUMAN
1433G_HUMAN	MFAP1_HUMAN
1433G_HUMAN	MGN2_HUMAN
1433G_HUMAN	MGN_HUMAN
1433G_HUMAN	MILK1_HUMAN
1433G_HUMAN	MLE1_HUMAN
1433G_HUMAN	MP2K5_HUMAN
1433G_HUMAN	MPRIP_HUMAN
1433G_HUMAN	MYCB2_HUMAN
1433G_HUMAN	MYCPP_HUMAN
1433G_HUMAN	NADK_HUMAN
1433G_HUMAN	NCBP1_HUMAN
1433G_HUMAN	NCKP1_HUMAN
1433G_HUMAN	NDE1_HUMAN
1433G_HUMAN	NDRG1_HUMAN
1433G_HUMAN	NEDD1_HUMAN
1433G_HUMAN	NEK2_HUMAN
1433G_HUMAN	NELFE_HUMAN
1433G_HUMAN	NFL_HUMAN
1433G_HUMAN	NGAP_HUMAN
1433G_HUMAN	NINL_HUMAN
1433G_HUMAN	NIPA_HUMAN
1433G_HUMAN	NOLC1_HUMAN
1433G_HUMAN	O75118_HUMAN
1433G_HUMAN	ODFP2_HUMAN
1433G_HUMAN	OFD1_HUMAN
1433G_HUMAN	OSBL3_HUMAN
1433G_HUMAN	OSR3_HUMAN
1433G_HUMAN	P85A_HUMAN
1433G_HUMAN	PABP1_HUMAN
1433G_HUMAN	PABP2_HUMAN
1433G_HUMAN	PAK4_HUMAN
1433G_HUMAN	PAR3L_HUMAN
1433G_HUMAN	PARD3_HUMAN
1433G_HUMAN	PCM1_HUMAN
1433G_HUMAN	PCNT_HUMAN
1433G_HUMAN	PCTK1_HUMAN
1433G_HUMAN	PCTK2_HUMAN
1433G_HUMAN	PDK4_HUMAN
1433G_HUMAN	PDRG1_HUMAN
1433G_HUMAN	PGAM2_HUMAN
1433G_HUMAN	PHS2_HUMAN
1433G_HUMAN	PI3R4_HUMAN
1433G_HUMAN	PI4KB_HUMAN
1433G_HUMAN	PININ_HUMAN
1433G_HUMAN	PK3C3_HUMAN
1433G_HUMAN	PLK1_HUMAN
1433G_HUMAN	PLK4_HUMAN
1433G_HUMAN	PPIG_HUMAN
1433G_HUMAN	PPR3D_HUMAN
1433G_HUMAN	PR38B_HUMAN
1433G_HUMAN	PR40A_HUMAN
1433G_HUMAN	PRKDC_HUMAN
1433G_HUMAN	PRP19_HUMAN
1433G_HUMAN	PRP4B_HUMAN
1433G_HUMAN	PTN3_HUMAN
1433G_HUMAN	PUF60_HUMAN
1433G_HUMAN	PYRG1_HUMAN
1433G_HUMAN	Q15287_HUMAN
1433G_HUMAN	Q549U1_HUMAN
1433G_HUMAN	Q5R2W2_HUMAN
1433G_HUMAN	Q6ICG6_HUMAN
1433G_HUMAN	Q6PEW4_HUMAN
1433G_HUMAN	Q6UUV8_HUMAN
1433G_HUMAN	Q6W9G7_HUMAN
1433G_HUMAN	Q6ZR29_HUMAN
1433G_HUMAN	Q6ZU52_HUMAN
1433G_HUMAN	Q7Z401_HUMAN
1433G_HUMAN	Q7Z5Y2_HUMAN
1433G_HUMAN	Q7Z6H2_HUMAN
1433G_HUMAN	Q86X27_HUMAN
1433G_HUMAN	Q86X29_HUMAN
1433G_HUMAN	Q8IUK7_HUMAN
1433G_HUMAN	Q8IUY9_HUMAN
1433G_HUMAN	Q8IXP7_HUMAN
1433G_HUMAN	Q8IXV2_HUMAN
1433G_HUMAN	Q8IYB3_HUMAN
1433G_HUMAN	Q8N4E1_HUMAN
1433G_HUMAN	Q8N9M5_HUMAN
1433G_HUMAN	Q8NA55_HUMAN
1433G_HUMAN	Q8NB74_HUMAN
1433G_HUMAN	Q8NEB9_HUMAN
1433G_HUMAN	Q8NEM2_HUMAN
1433G_HUMAN	Q8TDA3_HUMAN
1433G_HUMAN	Q8WVP0_HUMAN
1433G_HUMAN	Q8WXQ6_HUMAN
1433G_HUMAN	Q96F86_HUMAN
1433G_HUMAN	Q96F87_HUMAN
1433G_HUMAN	Q96NI0_HUMAN
1433G_HUMAN	Q9C0E3_HUMAN
1433G_HUMAN	Q9H0H5_HUMAN
1433G_HUMAN	Q9H2P2_HUMAN
1433G_HUMAN	Q9NQG6_HUMAN
1433G_HUMAN	Q9NVQ6_HUMAN
1433G_HUMAN	Q9NW40_HUMAN
1433G_HUMAN	Q9NYK3_HUMAN
1433G_HUMAN	Q9NZA0_HUMAN
1433G_HUMAN	Q9P0V3_HUMAN
1433G_HUMAN	Q9P2L2_HUMAN
1433G_HUMAN	Q9P2S7_HUMAN
1433G_HUMAN	Q9UQ35_HUMAN
1433G_HUMAN	Q9Y3N6_HUMAN
1433G_HUMAN	Q9Y6A4_HUMAN
1433G_HUMAN	RABE1_HUMAN
1433G_HUMAN	RABX5_HUMAN
1433G_HUMAN	RAF1_HUMAN
1433G_HUMAN	RAI14_HUMAN
1433G_HUMAN	RASF8_HUMAN
1433G_HUMAN	RB6I2_HUMAN
1433G_HUMAN	RFIP2_HUMAN
1433G_HUMAN	RGAP1_HUMAN
1433G_HUMAN	RGPS2_HUMAN
1433G_HUMAN	RL3_HUMAN
1433G_HUMAN	RMD3_HUMAN
1433G_HUMAN	RNPS1_HUMAN
1433G_HUMAN	RO52_HUMAN
1433G_HUMAN	RSRC1_HUMAN
1433G_HUMAN	SAP18_HUMAN
1433G_HUMAN	SDCG8_HUMAN
1433G_HUMAN	SF13A_HUMAN
1433G_HUMAN	SF3B1_HUMAN
1433G_HUMAN	SF3B3_HUMAN
1433G_HUMAN	SFI1_HUMAN
1433G_HUMAN	SFR11_HUMAN
1433G_HUMAN	SFRS1_HUMAN
1433G_HUMAN	SFRS3_HUMAN
1433G_HUMAN	SFRS4_HUMAN
1433G_HUMAN	SFRS6_HUMAN
1433G_HUMAN	SH3B4_HUMAN
1433G_HUMAN	SHCBP_HUMAN
1433G_HUMAN	SIN1_HUMAN
1433G_HUMAN	SK2L2_HUMAN
1433G_HUMAN	SMAG1_HUMAN
1433G_HUMAN	SMAG2_HUMAN
1433G_HUMAN	SMC7L_HUMAN
1433G_HUMAN	SON_HUMAN
1433G_HUMAN	SPN90_HUMAN
1433G_HUMAN	SPRK1_HUMAN
1433G_HUMAN	SPTB2_HUMAN
1433G_HUMAN	SRC_HUMAN
1433G_HUMAN	SRPK1_HUMAN
1433G_HUMAN	SRRM1_HUMAN
1433G_HUMAN	SRRM2_HUMAN
1433G_HUMAN	SSNA1_HUMAN
1433G_HUMAN	SUV41_HUMAN
1433G_HUMAN	TBA1A_HUMAN
1433G_HUMAN	TBA1_HUMAN
1433G_HUMAN	TBA3_HUMAN
1433G_HUMAN	TBA4A_HUMAN
1433G_HUMAN	TBAK_HUMAN
1433G_HUMAN	TBB2C_HUMAN
1433G_HUMAN	TBB2_HUMAN
1433G_HUMAN	TBB4_HUMAN
1433G_HUMAN	TBB5_HUMAN
1433G_HUMAN	TBCD1_HUMAN
1433G_HUMAN	TBG1_HUMAN
1433G_HUMAN	TBG2_HUMAN
1433G_HUMAN	TIAM1_HUMAN
1433G_HUMAN	TM102_HUMAN
1433G_HUMAN	TNAP3_HUMAN
1433G_HUMAN	TPM1_HUMAN
1433G_HUMAN	TR150_HUMAN
1433G_HUMAN	TRA2A_HUMAN
1433G_HUMAN	TRA2B_HUMAN
1433G_HUMAN	TRMB_HUMAN
1433G_HUMAN	TSC1_HUMAN
1433G_HUMAN	TSC2_HUMAN
1433G_HUMAN	TTP_HUMAN
1433G_HUMAN	U520_HUMAN
1433G_HUMAN	U5S1_HUMAN
1433G_HUMAN	UAP56_HUMAN
1433G_HUMAN	UBIQ_HUMAN
1433G_HUMAN	UBP8_HUMAN
1433G_HUMAN	UCP2_HUMAN
1433G_HUMAN	UCP3_HUMAN
1433G_HUMAN	VANG2_HUMAN
1433G_HUMAN	VIME_HUMAN
1433G_HUMAN	WDR68_HUMAN
1433G_HUMAN	XPO2_HUMAN
1433G_HUMAN	YAP1_HUMAN
1433G_HUMAN	ZCH18_HUMAN
1433G_HUMAN	ZN295_HUMAN
1433G_HUMAN	ZN638_HUMAN
1433G_HUMAN	ZO2_HUMAN
1433S_HUMAN	1433G_HUMAN
1433S_HUMAN	ABLM1_HUMAN
1433S_HUMAN	ANS1A_HUMAN
1433S_HUMAN	APC_HUMAN
1433S_HUMAN	ARAF_HUMAN
1433S_HUMAN	ARHG5_HUMAN
1433S_HUMAN	ARHGG_HUMAN
1433S_HUMAN	ARHGH_HUMAN
1433S_HUMAN	BAXA_HUMAN
1433S_HUMAN	BAX_HUMAN
1433S_HUMAN	BCAR1_HUMAN
1433S_HUMAN	BRAF_HUMAN
1433S_HUMAN	CA106_HUMAN
1433S_HUMAN	CAV1_HUMAN
1433S_HUMAN	CDC2_HUMAN
1433S_HUMAN	CHST1_HUMAN
1433S_HUMAN	CING_HUMAN
1433S_HUMAN	CLD3_HUMAN
1433S_HUMAN	CLD4_HUMAN
1433S_HUMAN	CLK3_HUMAN
1433S_HUMAN	CSK21_HUMAN
1433S_HUMAN	CV009_HUMAN
1433S_HUMAN	CYH2_HUMAN
1433S_HUMAN	DCAF7_HUMAN
1433S_HUMAN	DIRA3_HUMAN
1433S_HUMAN	DTX2_HUMAN
1433S_HUMAN	DYR1A_HUMAN
1433S_HUMAN	EDC3_HUMAN
1433S_HUMAN	ELOC_HUMAN
1433S_HUMAN	ERRFI_HUMAN
1433S_HUMAN	F117B_HUMAN
1433S_HUMAN	FA53B_HUMAN
1433S_HUMAN	FABPE_HUMAN
1433S_HUMAN	GAN_HUMAN
1433S_HUMAN	GBLP_HUMAN
1433S_HUMAN	GRB7_HUMAN
1433S_HUMAN	GRIN2_HUMAN
1433S_HUMAN	HDAC4_HUMAN
1433S_HUMAN	HDAC5_HUMAN
1433S_HUMAN	HNRPU_HUMAN
1433S_HUMAN	IF4H_HUMAN
1433S_HUMAN	ILDR2_HUMAN
1433S_HUMAN	IRS1_HUMAN
1433S_HUMAN	IRS2_HUMAN
1433S_HUMAN	ISCU_HUMAN
1433S_HUMAN	JUB_HUMAN
1433S_HUMAN	K0408_HUMAN
1433S_HUMAN	K1C18_HUMAN
1433S_HUMAN	KIF23_HUMAN
1433S_HUMAN	KINH_HUMAN
1433S_HUMAN	KLC1_HUMAN
1433S_HUMAN	KLC2_HUMAN
1433S_HUMAN	KLDC2_HUMAN
1433S_HUMAN	KLK10_HUMAN
1433S_HUMAN	KLK6_HUMAN
1433S_HUMAN	KRA32_HUMAN
1433S_HUMAN	LAD1_HUMAN
1433S_HUMAN	LIPB1_HUMAN
1433S_HUMAN	LIPB2_HUMAN
1433S_HUMAN	LIS1_HUMAN
1433S_HUMAN	LMO7_HUMAN
1433S_HUMAN	M3K2_HUMAN
1433S_HUMAN	MAGI1_HUMAN
1433S_HUMAN	MARK1_HUMAN
1433S_HUMAN	MARK2_HUMAN
1433S_HUMAN	MARK3_HUMAN
1433S_HUMAN	MDM4_HUMAN
1433S_HUMAN	MLTK_HUMAN
1433S_HUMAN	MPIP2_HUMAN
1433S_HUMAN	MPRIP_HUMAN
1433S_HUMAN	MRCKG_HUMAN
1433S_HUMAN	MYCB2_HUMAN
1433S_HUMAN	NGAL_HUMAN
1433S_HUMAN	NTAQ1_HUMAN
1433S_HUMAN	OSBL3_HUMAN
1433S_HUMAN	P3C2B_HUMAN
1433S_HUMAN	P53_HUMAN
1433S_HUMAN	PACS2_HUMAN
1433S_HUMAN	PAK4_HUMAN
1433S_HUMAN	PAR3L_HUMAN
1433S_HUMAN	PARD3_HUMAN
1433S_HUMAN	PDZ11_HUMAN
1433S_HUMAN	PI4KB_HUMAN
1433S_HUMAN	PITX1_HUMAN
1433S_HUMAN	PKHF2_HUMAN
1433S_HUMAN	PKP2_HUMAN
1433S_HUMAN	PKP3_HUMAN
1433S_HUMAN	PLK4_HUMAN
1433S_HUMAN	PPR3D_HUMAN
1433S_HUMAN	PTN2_HUMAN
1433S_HUMAN	PTN3_HUMAN
1433S_HUMAN	PTOV1_HUMAN
1433S_HUMAN	Q53TS8_HUMAN
1433S_HUMAN	Q59GD6_HUMAN
1433S_HUMAN	Q6N089_HUMAN
1433S_HUMAN	Q6ZMB6_HUMAN
1433S_HUMAN	Q6ZU52_HUMAN
1433S_HUMAN	Q86SK9_HUMAN
1433S_HUMAN	Q8N236_HUMAN
1433S_HUMAN	Q8TAU3_HUMAN
1433S_HUMAN	Q8WU02_HUMAN
1433S_HUMAN	Q96HA8_HUMAN
1433S_HUMAN	Q9BZY1_HUMAN
1433S_HUMAN	Q9H8W4_HUMAN
1433S_HUMAN	RAE1L_HUMAN
1433S_HUMAN	RAF1_HUMAN
1433S_HUMAN	RB11A_HUMAN
1433S_HUMAN	REEP3_HUMAN
1433S_HUMAN	REEP4_HUMAN
1433S_HUMAN	RGAP1_HUMAN
1433S_HUMAN	RGPS2_HUMAN
1433S_HUMAN	RHG21_HUMAN
1433S_HUMAN	RHGBA_HUMAN
1433S_HUMAN	RHPN2_HUMAN
1433S_HUMAN	RICS_HUMAN
1433S_HUMAN	RICTR_HUMAN
1433S_HUMAN	RND3_HUMAN
1433S_HUMAN	S10A2_HUMAN
1433S_HUMAN	S10A7_HUMAN
1433S_HUMAN	SASH1_HUMAN
1433S_HUMAN	SAV1_HUMAN
1433S_HUMAN	SCEL_HUMAN
1433S_HUMAN	SF13A_HUMAN
1433S_HUMAN	SG223_HUMAN
1433S_HUMAN	SGF29_HUMAN
1433S_HUMAN	SH23A_HUMAN
1433S_HUMAN	SH3B4_HUMAN
1433S_HUMAN	SHCBP_HUMAN
1433S_HUMAN	SHRM1_HUMAN
1433S_HUMAN	SHRM3_HUMAN
1433S_HUMAN	SI1L1_HUMAN
1433S_HUMAN	SI1L3_HUMAN
1433S_HUMAN	SIN1_HUMAN
1433S_HUMAN	SMAG1_HUMAN
1433S_HUMAN	SMUF2_HUMAN
1433S_HUMAN	SPIR1_HUMAN
1433S_HUMAN	SRBS2_HUMAN
1433S_HUMAN	SRRM2_HUMAN
1433S_HUMAN	ST14_HUMAN
1433S_HUMAN	ST5_HUMAN
1433S_HUMAN	SYNJ2_HUMAN
1433S_HUMAN	TACD2_HUMAN
1433S_HUMAN	TBL3_HUMAN
1433S_HUMAN	TENS4_HUMAN
1433S_HUMAN	THAP1_HUMAN
1433S_HUMAN	TNK1_HUMAN
1433S_HUMAN	TRI25_HUMAN
1433S_HUMAN	TRI32_HUMAN
1433S_HUMAN	TRMB_HUMAN
1433S_HUMAN	TSC2_HUMAN
1433S_HUMAN	TSP2_HUMAN
1433S_HUMAN	TTP_HUMAN
1433S_HUMAN	UBP43_HUMAN
1433S_HUMAN	UBP8_HUMAN
1433S_HUMAN	WDR37_HUMAN
1433S_HUMAN	WEE1_HUMAN
1433S_HUMAN	Y0514_HUMAN
1433S_HUMAN	ZN638_HUMAN
1433S_HUMAN	ZO2_HUMAN
1433T_HUMAN	1433Z_HUMAN
1433T_HUMAN	143EE_HUMAN
1433T_HUMAN	ANM5_HUMAN
1433T_HUMAN	BAD_HUMAN
1433T_HUMAN	BAXA_HUMAN
1433T_HUMAN	BAXB_HUMAN
1433T_HUMAN	BRAF1_HUMAN
1433T_HUMAN	CALL5_HUMAN
1433T_HUMAN	CBL_HUMAN
1433T_HUMAN	CBWD2_HUMAN
1433T_HUMAN	CDN1B_HUMAN
1433T_HUMAN	CSK_HUMAN
1433T_HUMAN	CV009_HUMAN
1433T_HUMAN	DDX48_HUMAN
1433T_HUMAN	DDX6_HUMAN
1433T_HUMAN	DFFA_HUMAN
1433T_HUMAN	DISC1_HUMAN
1433T_HUMAN	E41L2_HUMAN
1433T_HUMAN	E41L3_HUMAN
1433T_HUMAN	EDC3_HUMAN
1433T_HUMAN	EMAL3_HUMAN
1433T_HUMAN	F262_HUMAN
1433T_HUMAN	FA83G_HUMAN
1433T_HUMAN	FGR_HUMAN
1433T_HUMAN	FRAP_HUMAN
1433T_HUMAN	GRP3_HUMAN
1433T_HUMAN	HCLS1_HUMAN
1433T_HUMAN	HSP71_HUMAN
1433T_HUMAN	HSP74_HUMAN
1433T_HUMAN	HSP7C_HUMAN
1433T_HUMAN	IF4A3_HUMAN
1433T_HUMAN	IRS2_HUMAN
1433T_HUMAN	K1C9_HUMAN
1433T_HUMAN	K2C1_HUMAN
1433T_HUMAN	KIF23_HUMAN
1433T_HUMAN	KIF5C_HUMAN
1433T_HUMAN	KINH_HUMAN
1433T_HUMAN	KLC2_HUMAN
1433T_HUMAN	KLC4_HUMAN
1433T_HUMAN	KPCD1_HUMAN
1433T_HUMAN	KSYK_HUMAN
1433T_HUMAN	LARP1_HUMAN
1433T_HUMAN	LC7L2_HUMAN
1433T_HUMAN	LIPB1_HUMAN
1433T_HUMAN	LYN_HUMAN
1433T_HUMAN	LYST_HUMAN
1433T_HUMAN	MARK3_HUMAN
1433T_HUMAN	MEP50_HUMAN
1433T_HUMAN	MGN_HUMAN
1433T_HUMAN	MP2K5_HUMAN
1433T_HUMAN	MPIP2_HUMAN
1433T_HUMAN	MPRIP_HUMAN
1433T_HUMAN	MYCPP_HUMAN
1433T_HUMAN	NFAC2_HUMAN
1433T_HUMAN	NFAC4_HUMAN
1433T_HUMAN	NIF3L_HUMAN
1433T_HUMAN	P53_HUMAN
1433T_HUMAN	PAK4_HUMAN
1433T_HUMAN	PAK6_HUMAN
1433T_HUMAN	PDPK1_HUMAN
1433T_HUMAN	PDRG1_HUMAN
1433T_HUMAN	PI4KB_HUMAN
1433T_HUMAN	PK3CB_HUMAN
1433T_HUMAN	PNKP_HUMAN
1433T_HUMAN	PTN1_HUMAN
1433T_HUMAN	Q8IXP7_HUMAN
1433T_HUMAN	RABE1_HUMAN
1433T_HUMAN	RAF1_HUMAN
1433T_HUMAN	RAI14_HUMAN
1433T_HUMAN	RGS3_HUMAN
1433T_HUMAN	RGS7_HUMAN
1433T_HUMAN	SF13A_HUMAN
1433T_HUMAN	SFRS1_HUMAN
1433T_HUMAN	SFRS3_HUMAN
1433T_HUMAN	SFRS6_HUMAN
1433T_HUMAN	SH3B4_HUMAN
1433T_HUMAN	SKB1_HUMAN
1433T_HUMAN	SMAG2_HUMAN
1433T_HUMAN	SPIR1_HUMAN
1433T_HUMAN	SUV41_HUMAN
1433T_HUMAN	TBA2_HUMAN
1433T_HUMAN	TBA3C_HUMAN
1433T_HUMAN	TERT_HUMAN
1433T_HUMAN	TSC1_HUMAN
1433T_HUMAN	TSC2_HUMAN
1433T_HUMAN	TYRP1_HUMAN
1433T_HUMAN	UBP8_HUMAN
1433T_HUMAN	UCP2_HUMAN
1433T_HUMAN	UCP3_HUMAN
1433T_HUMAN	YAP1_HUMAN
1433T_HUMAN	ZO2_HUMAN
1433Z_HUMAN	1433E_HUMAN
1433Z_HUMAN	1433S_HUMAN
1433Z_HUMAN	143EE_HUMAN
1433Z_HUMAN	3BP5L_HUMAN
1433Z_HUMAN	ACSL4_HUMAN
1433Z_HUMAN	ACTB_HUMAN
1433Z_HUMAN	ACTN4_HUMAN
1433Z_HUMAN	ADA22_HUMAN
1433Z_HUMAN	ADA2A_HUMAN
1433Z_HUMAN	ADA2B_HUMAN
1433Z_HUMAN	ADA2C_HUMAN
1433Z_HUMAN	AFAD_HUMAN
1433Z_HUMAN	AHNK_HUMAN
1433Z_HUMAN	AKP13_HUMAN
1433Z_HUMAN	AKT1_HUMAN
1433Z_HUMAN	AKTS1_HUMAN
1433Z_HUMAN	ALDOA_HUMAN
1433Z_HUMAN	ANM5_HUMAN
1433Z_HUMAN	ANXA1_HUMAN
1433Z_HUMAN	ANXA2_HUMAN
1433Z_HUMAN	APC_HUMAN
1433Z_HUMAN	AR6P1_HUMAN
1433Z_HUMAN	ARD1H_HUMAN
1433Z_HUMAN	ARHG2_HUMAN
1433Z_HUMAN	ARHGG_HUMAN
1433Z_HUMAN	ASPP2_HUMAN
1433Z_HUMAN	ASSY_HUMAN
1433Z_HUMAN	ATLA2_HUMAN
1433Z_HUMAN	ATLA3_HUMAN
1433Z_HUMAN	ATPA_HUMAN
1433Z_HUMAN	ATPB_HUMAN
1433Z_HUMAN	BAD_HUMAN
1433Z_HUMAN	BAP31_HUMAN
1433Z_HUMAN	BCA1_HUMAN
1433Z_HUMAN	BCR_HUMAN
1433Z_HUMAN	BRAF1_HUMAN
1433Z_HUMAN	CALM_HUMAN
1433Z_HUMAN	CALR_HUMAN
1433Z_HUMAN	CAND1_HUMAN
1433Z_HUMAN	CDC5L_HUMAN
1433Z_HUMAN	CDK17_HUMAN
1433Z_HUMAN	CDK18_HUMAN
1433Z_HUMAN	CE170_HUMAN
1433Z_HUMAN	CGL_HUMAN
1433Z_HUMAN	CH60_HUMAN
1433Z_HUMAN	CIC_HUMAN
1433Z_HUMAN	CING_HUMAN
1433Z_HUMAN	CL051_HUMAN
1433Z_HUMAN	CLH1_HUMAN
1433Z_HUMAN	CLIC4_HUMAN
1433Z_HUMAN	CN166_HUMAN
1433Z_HUMAN	CPNE1_HUMAN
1433Z_HUMAN	CPSM_HUMAN
1433Z_HUMAN	CSN4_HUMAN
1433Z_HUMAN	CV009_HUMAN
1433Z_HUMAN	CV028_HUMAN
1433Z_HUMAN	CYFP1_HUMAN
1433Z_HUMAN	CYFP2_HUMAN
1433Z_HUMAN	DCAF7_HUMAN
1433Z_HUMAN	DCD_HUMAN
1433Z_HUMAN	DCP1A_HUMAN
1433Z_HUMAN	DDB1_HUMAN
1433Z_HUMAN	DDX1_HUMAN
1433Z_HUMAN	DDX3X_HUMAN
1433Z_HUMAN	DESP_HUMAN
1433Z_HUMAN	DFFA_HUMAN
1433Z_HUMAN	DHX9_HUMAN
1433Z_HUMAN	DISC1_HUMAN
1433Z_HUMAN	DNMT1_HUMAN
1433Z_HUMAN	DOCK7_HUMAN
1433Z_HUMAN	DYHC1_HUMAN
1433Z_HUMAN	E41L3_HUMAN
1433Z_HUMAN	ECHM_HUMAN
1433Z_HUMAN	EDC3_HUMAN
1433Z_HUMAN	EF1A1_HUMAN
1433Z_HUMAN	EF1B_HUMAN
1433Z_HUMAN	EF2_HUMAN
1433Z_HUMAN	EFTS_HUMAN
1433Z_HUMAN	EIF3A_HUMAN
1433Z_HUMAN	EIF3F_HUMAN
1433Z_HUMAN	ENOA_HUMAN
1433Z_HUMAN	ESYT1_HUMAN
1433Z_HUMAN	EZRI_HUMAN
1433Z_HUMAN	F262_HUMAN
1433Z_HUMAN	FAS_HUMAN
1433Z_HUMAN	FKBP4_HUMAN
1433Z_HUMAN	FL2D_HUMAN
1433Z_HUMAN	FLNA_HUMAN
1433Z_HUMAN	FNBP2_HUMAN
1433Z_HUMAN	FOXO1_HUMAN
1433Z_HUMAN	FOXO3_HUMAN
1433Z_HUMAN	FRAP_HUMAN
1433Z_HUMAN	FSCN1_HUMAN
1433Z_HUMAN	G3P_HUMAN
1433Z_HUMAN	GBRAP_HUMAN
1433Z_HUMAN	GCN1L_HUMAN
1433Z_HUMAN	GCNL2_HUMAN
1433Z_HUMAN	GDIA_HUMAN
1433Z_HUMAN	GP1BA_HUMAN
1433Z_HUMAN	GRP75_HUMAN
1433Z_HUMAN	GRP78_HUMAN
1433Z_HUMAN	H2A1_HUMAN
1433Z_HUMAN	H2B2F_HUMAN
1433Z_HUMAN	H4_HUMAN
1433Z_HUMAN	HAKAI_HUMAN
1433Z_HUMAN	HAT1_HUMAN
1433Z_HUMAN	HDAC4_HUMAN
1433Z_HUMAN	HDAC5_HUMAN
1433Z_HUMAN	HDAC7_HUMAN
1433Z_HUMAN	HNRH2_HUMAN
1433Z_HUMAN	HNRPC_HUMAN
1433Z_HUMAN	HNRPF_HUMAN
1433Z_HUMAN	HNRPK_HUMAN
1433Z_HUMAN	HNRPL_HUMAN
1433Z_HUMAN	HNRPU_HUMAN
1433Z_HUMAN	HORN_HUMAN
1433Z_HUMAN	HS105_HUMAN
1433Z_HUMAN	HS71L_HUMAN
1433Z_HUMAN	HS90A_HUMAN
1433Z_HUMAN	HS90B_HUMAN
1433Z_HUMAN	HSP71_HUMAN
1433Z_HUMAN	HSP74_HUMAN
1433Z_HUMAN	HSP7C_HUMAN
1433Z_HUMAN	HSPB1_HUMAN
1433Z_HUMAN	HUS1_HUMAN
1433Z_HUMAN	I5P1_HUMAN
1433Z_HUMAN	IDHC_HUMAN
1433Z_HUMAN	IF4A1_HUMAN
1433Z_HUMAN	IF4A3_HUMAN
1433Z_HUMAN	IF4E2_HUMAN
1433Z_HUMAN	IF4G1_HUMAN
1433Z_HUMAN	IGF1R_HUMAN
1433Z_HUMAN	IL3RB_HUMAN
1433Z_HUMAN	IMA1_HUMAN
1433Z_HUMAN	IMB1_HUMAN
1433Z_HUMAN	IPO7_HUMAN
1433Z_HUMAN	IQGA1_HUMAN
1433Z_HUMAN	IRS1_HUMAN
1433Z_HUMAN	IRS2_HUMAN
1433Z_HUMAN	K1377_HUMAN
1433Z_HUMAN	K6PP_HUMAN
1433Z_HUMAN	KAPCA_HUMAN
1433Z_HUMAN	KCRU_HUMAN
1433Z_HUMAN	KCY_HUMAN
1433Z_HUMAN	KIF1C_HUMAN
1433Z_HUMAN	KIF23_HUMAN
1433Z_HUMAN	KINH_HUMAN
1433Z_HUMAN	KITH_HUMAN
1433Z_HUMAN	KLC1_HUMAN
1433Z_HUMAN	KLC2_HUMAN
1433Z_HUMAN	KLC3_HUMAN
1433Z_HUMAN	KLC4_HUMAN
1433Z_HUMAN	KPCA_HUMAN
1433Z_HUMAN	KPCI_HUMAN
1433Z_HUMAN	KPYM_HUMAN
1433Z_HUMAN	KU70_HUMAN
1433Z_HUMAN	LANC1_HUMAN
1433Z_HUMAN	LARP1_HUMAN
1433Z_HUMAN	LA_HUMAN
1433Z_HUMAN	LDHA_HUMAN
1433Z_HUMAN	LDHB_HUMAN
1433Z_HUMAN	LEG1_HUMAN
1433Z_HUMAN	LIMA1_HUMAN
1433Z_HUMAN	LIPB1_HUMAN
1433Z_HUMAN	LMNA_HUMAN
1433Z_HUMAN	LMNB1_HUMAN
1433Z_HUMAN	LMO7_HUMAN
1433Z_HUMAN	LOX12_HUMAN
1433Z_HUMAN	LOX15_HUMAN
1433Z_HUMAN	LOX5_HUMAN
1433Z_HUMAN	LPPL_HUMAN
1433Z_HUMAN	LPPRC_HUMAN
1433Z_HUMAN	LX15B_HUMAN
1433Z_HUMAN	LYPA1_HUMAN
1433Z_HUMAN	LYPA2_HUMAN
1433Z_HUMAN	M3K2_HUMAN
1433Z_HUMAN	M3K5_HUMAN
1433Z_HUMAN	MAPK2_HUMAN
1433Z_HUMAN	MCM3_HUMAN
1433Z_HUMAN	MDM4_HUMAN
1433Z_HUMAN	MEP50_HUMAN
1433Z_HUMAN	MET_HUMAN
1433Z_HUMAN	MK01_HUMAN
1433Z_HUMAN	MK03_HUMAN
1433Z_HUMAN	MK04_HUMAN
1433Z_HUMAN	MK06_HUMAN
1433Z_HUMAN	MLF1_HUMAN
1433Z_HUMAN	MP2K5_HUMAN
1433Z_HUMAN	MPIP3_HUMAN
1433Z_HUMAN	MPRIP_HUMAN
1433Z_HUMAN	MVP_HUMAN
1433Z_HUMAN	MYCB2_HUMAN
1433Z_HUMAN	MYCPP_HUMAN
1433Z_HUMAN	MYOF_HUMAN
1433Z_HUMAN	NADK_HUMAN
1433Z_HUMAN	NAPSA_HUMAN
1433Z_HUMAN	NAT5_HUMAN
1433Z_HUMAN	NAT6_HUMAN
1433Z_HUMAN	NCKP1_HUMAN
1433Z_HUMAN	NDKB_HUMAN
1433Z_HUMAN	NFAC1_HUMAN
1433Z_HUMAN	NFAC2_HUMAN
1433Z_HUMAN	NFAC4_HUMAN
1433Z_HUMAN	NOLC1_HUMAN
1433Z_HUMAN	NPM_HUMAN
1433Z_HUMAN	NUCL_HUMAN
1433Z_HUMAN	NUFP1_HUMAN
1433Z_HUMAN	NUMA1_HUMAN
1433Z_HUMAN	O75498_HUMAN
1433Z_HUMAN	O75808_HUMAN
1433Z_HUMAN	OCTC_HUMAN
1433Z_HUMAN	ODB2_HUMAN
1433Z_HUMAN	P3C2B_HUMAN
1433Z_HUMAN	P53_HUMAN
1433Z_HUMAN	PA21B_HUMAN
1433Z_HUMAN	PA24A_HUMAN
1433Z_HUMAN	PA2G3_HUMAN
1433Z_HUMAN	PA2G5_HUMAN
1433Z_HUMAN	PA2G6_HUMAN
1433Z_HUMAN	PA2GA_HUMAN
1433Z_HUMAN	PA2GD_HUMAN
1433Z_HUMAN	PA2GE_HUMAN
1433Z_HUMAN	PA2GF_HUMAN
1433Z_HUMAN	PA2GX_HUMAN
1433Z_HUMAN	PABP2_HUMAN
1433Z_HUMAN	PABP4_HUMAN
1433Z_HUMAN	PAK4_HUMAN
1433Z_HUMAN	PANK1_HUMAN
1433Z_HUMAN	PANK2_HUMAN
1433Z_HUMAN	PAR6G_HUMAN
1433Z_HUMAN	PARD3_HUMAN
1433Z_HUMAN	PAXI_HUMAN
1433Z_HUMAN	PCAF_HUMAN
1433Z_HUMAN	PCBP1_HUMAN
1433Z_HUMAN	PCM1_HUMAN
1433Z_HUMAN	PCTK1_HUMAN
1433Z_HUMAN	PDCD6_HUMAN
1433Z_HUMAN	PDE3A_HUMAN
1433Z_HUMAN	PDIA1_HUMAN
1433Z_HUMAN	PDRG1_HUMAN
1433Z_HUMAN	PDXK_HUMAN
1433Z_HUMAN	PEMT_HUMAN
1433Z_HUMAN	PERQ2_HUMAN
1433Z_HUMAN	PG12B_HUMAN
1433Z_HUMAN	PGAM1_HUMAN
1433Z_HUMAN	PGH1_HUMAN
1433Z_HUMAN	PGH2_HUMAN
1433Z_HUMAN	PGK1_HUMAN
1433Z_HUMAN	PGRP1_HUMAN
1433Z_HUMAN	PININ_HUMAN
1433Z_HUMAN	PISD_HUMAN
1433Z_HUMAN	PLD1_HUMAN
1433Z_HUMAN	PLD2_HUMAN
1433Z_HUMAN	PNKP_HUMAN
1433Z_HUMAN	PNMA1_HUMAN
1433Z_HUMAN	PNMA2_HUMAN
1433Z_HUMAN	PP13_HUMAN
1433Z_HUMAN	PPIA_HUMAN
1433Z_HUMAN	PPR3D_HUMAN
1433Z_HUMAN	PRDX1_HUMAN
1433Z_HUMAN	PRI2_HUMAN
1433Z_HUMAN	PROF1_HUMAN
1433Z_HUMAN	PSB3_HUMAN
1433Z_HUMAN	PSMD1_HUMAN
1433Z_HUMAN	PSMD2_HUMAN
1433Z_HUMAN	PTBP1_HUMAN
1433Z_HUMAN	PTN3_HUMAN
1433Z_HUMAN	PURA1_HUMAN
1433Z_HUMAN	PYR1_HUMAN
1433Z_HUMAN	PYRG1_HUMAN
1433Z_HUMAN	Q14422_HUMAN
1433Z_HUMAN	Q567R6_HUMAN
1433Z_HUMAN	Q5CAQ5_HUMAN
1433Z_HUMAN	Q6NSG7_HUMAN
1433Z_HUMAN	Q8IUY4_HUMAN
1433Z_HUMAN	Q8IUY9_HUMAN
1433Z_HUMAN	Q8IXP7_HUMAN
1433Z_HUMAN	Q8NHE2_HUMAN
1433Z_HUMAN	Q96HD7_HUMAN
1433Z_HUMAN	Q9NYK3_HUMAN
1433Z_HUMAN	Q9P2H0_HUMAN
1433Z_HUMAN	RAI14_HUMAN
1433Z_HUMAN	RBL1_HUMAN
1433Z_HUMAN	RBM19_HUMAN
1433Z_HUMAN	REEP6_HUMAN
1433Z_HUMAN	RFC4_HUMAN
1433Z_HUMAN	RGPS2_HUMAN
1433Z_HUMAN	RGS3_HUMAN
1433Z_HUMAN	RHG21_HUMAN
1433Z_HUMAN	RL10A_HUMAN
1433Z_HUMAN	RL19_HUMAN
1433Z_HUMAN	RL31_HUMAN
1433Z_HUMAN	RL5_HUMAN
1433Z_HUMAN	RL6_HUMAN
1433Z_HUMAN	RL8_HUMAN
1433Z_HUMAN	RLA0_HUMAN
1433Z_HUMAN	RLA1_HUMAN
1433Z_HUMAN	RLA2_HUMAN
1433Z_HUMAN	RNPS1_HUMAN
1433Z_HUMAN	RO52_HUMAN
1433Z_HUMAN	ROA1_HUMAN
1433Z_HUMAN	RPGF2_HUMAN
1433Z_HUMAN	RPGP1_HUMAN
1433Z_HUMAN	RS3_HUMAN
1433Z_HUMAN	RS7_HUMAN
1433Z_HUMAN	RT27_HUMAN
1433Z_HUMAN	RT30_HUMAN
1433Z_HUMAN	RUVB1_HUMAN
1433Z_HUMAN	RUVB2_HUMAN
1433Z_HUMAN	S10A6_HUMAN
1433Z_HUMAN	S27A2_HUMAN
1433Z_HUMAN	SAHH_HUMAN
1433Z_HUMAN	SAP_HUMAN
1433Z_HUMAN	SCAM2_HUMAN
1433Z_HUMAN	SET_HUMAN
1433Z_HUMAN	SF3B1_HUMAN
1433Z_HUMAN	SF3B3_HUMAN
1433Z_HUMAN	SH3B4_HUMAN
1433Z_HUMAN	SI1L3_HUMAN
1433Z_HUMAN	SLAI2_HUMAN
1433Z_HUMAN	SMAG2_HUMAN
1433Z_HUMAN	SMC5_HUMAN
1433Z_HUMAN	SNAT_HUMAN
1433Z_HUMAN	SO4A1_HUMAN
1433Z_HUMAN	SPRE_HUMAN
1433Z_HUMAN	SPT6H_HUMAN
1433Z_HUMAN	SPTA2_HUMAN
1433Z_HUMAN	SPTB2_HUMAN
1433Z_HUMAN	SRBS2_HUMAN
1433Z_HUMAN	SRGP1_HUMAN
1433Z_HUMAN	SRRM2_HUMAN
1433Z_HUMAN	STK25_HUMAN
1433Z_HUMAN	STK38_HUMAN
1433Z_HUMAN	STX1A_HUMAN
1433Z_HUMAN	SYAC_HUMAN
1433Z_HUMAN	SYEP_HUMAN
1433Z_HUMAN	SYG_HUMAN
1433Z_HUMAN	SYIC_HUMAN
1433Z_HUMAN	SYLC_HUMAN
1433Z_HUMAN	SYVC_HUMAN
1433Z_HUMAN	TAU_HUMAN
1433Z_HUMAN	TBA1A_HUMAN
1433Z_HUMAN	TBA1B_HUMAN
1433Z_HUMAN	TBB1_HUMAN
1433Z_HUMAN	TBB5_HUMAN
1433Z_HUMAN	TBCD4_HUMAN
1433Z_HUMAN	TBG1_HUMAN
1433Z_HUMAN	TCPA_HUMAN
1433Z_HUMAN	TCPB_HUMAN
1433Z_HUMAN	TCPD_HUMAN
1433Z_HUMAN	TCPG_HUMAN
1433Z_HUMAN	TCPH_HUMAN
1433Z_HUMAN	TCPQ_HUMAN
1433Z_HUMAN	TCPZ_HUMAN
1433Z_HUMAN	TERA_HUMAN
1433Z_HUMAN	TF2H4_HUMAN
1433Z_HUMAN	TFR1_HUMAN
1433Z_HUMAN	THIO_HUMAN
1433Z_HUMAN	TIF1B_HUMAN
1433Z_HUMAN	TIM50_HUMAN
1433Z_HUMAN	TKT_HUMAN
1433Z_HUMAN	TLN1_HUMAN
1433Z_HUMAN	TNAP3_HUMAN
1433Z_HUMAN	TNPO1_HUMAN
1433Z_HUMAN	TPD52_HUMAN
1433Z_HUMAN	TPD54_HUMAN
1433Z_HUMAN	TPH1_HUMAN
1433Z_HUMAN	TPIS_HUMAN
1433Z_HUMAN	TRA2B_HUMAN
1433Z_HUMAN	TRAP1_HUMAN
1433Z_HUMAN	TSC1_HUMAN
1433Z_HUMAN	TSR1_HUMAN
1433Z_HUMAN	UBA1_HUMAN
1433Z_HUMAN	UBIQ_HUMAN
1433Z_HUMAN	UBP8_HUMAN
1433Z_HUMAN	UCP2_HUMAN
1433Z_HUMAN	UCP3_HUMAN
1433Z_HUMAN	VA0D_HUMAN
1433Z_HUMAN	VIME_HUMAN
1433Z_HUMAN	VINC_HUMAN
1433Z_HUMAN	VIR_HUMAN
1433Z_HUMAN	WDR61_HUMAN
1433Z_HUMAN	WDR6_HUMAN
1433Z_HUMAN	WWC1_HUMAN
1433Z_HUMAN	WWC2_HUMAN
1433Z_HUMAN	XPO1_HUMAN
1433Z_HUMAN	XPO2_HUMAN
1433Z_HUMAN	YAP1_HUMAN
1433Z_HUMAN	YBOX1_HUMAN
1433Z_HUMAN	ZC3HD_HUMAN
1433Z_HUMAN	ZO2_HUMAN
143EE_HUMAN	BAD_HUMAN
143EE_HUMAN	CDN1B_HUMAN
143EE_HUMAN	HDAC4_HUMAN
143EE_HUMAN	HS90A_HUMAN
143EE_HUMAN	HSP71_HUMAN
143EE_HUMAN	HSP74_HUMAN
143EE_HUMAN	IGF1R_HUMAN
143EE_HUMAN	IRS1_HUMAN
143EE_HUMAN	IRS2_HUMAN
143EE_HUMAN	MPIP1_HUMAN
143EE_HUMAN	MPIP2_HUMAN
143EE_HUMAN	RAF1_HUMAN
143EE_HUMAN	RGS3_HUMAN
143EE_HUMAN	SRC_HUMAN
143EE_HUMAN	TGFB1_HUMAN
143EE_HUMAN	TOP2A_HUMAN
143EE_HUMAN	WDR6_HUMAN
1A01_HUMAN	1C04_HUMAN
1A01_HUMAN	B2MG_HUMAN
1A01_HUMAN	CBPN_HUMAN
1A01_HUMAN	CD3D_HUMAN
1A01_HUMAN	CD3E_HUMAN
1A01_HUMAN	CD3G_HUMAN
1A01_HUMAN	CD3Z_HUMAN
1A01_HUMAN	CD8A_HUMAN
1A01_HUMAN	CD8B_HUMAN
1A01_HUMAN	HFE_HUMAN
1A01_HUMAN	HLAF_HUMAN
1A01_HUMAN	HLAG_HUMAN
1A01_HUMAN	TCA_HUMAN
1A01_HUMAN	TCB_HUMAN
1A01_HUMAN	TVA1_HUMAN
1A01_HUMAN	TVA2_HUMAN
1A01_HUMAN	TVA3_HUMAN
1A01_HUMAN	TVB1_HUMAN
1A01_HUMAN	TVB2_HUMAN
1A01_HUMAN	TYRP1_HUMAN
1A02_HUMAN	AP1B1_HUMAN
1A02_HUMAN	AP1G1_HUMAN
1A02_HUMAN	AP1M1_HUMAN
1A02_HUMAN	AP1M2_HUMAN
1A02_HUMAN	AP1S1_HUMAN
1A02_HUMAN	AP1S2_HUMAN
1A02_HUMAN	AP1S3_HUMAN
1A02_HUMAN	B2MG_HUMAN
1A02_HUMAN	CD3D_HUMAN
1A02_HUMAN	CD3E_HUMAN
1A02_HUMAN	CD3G_HUMAN
1A02_HUMAN	CD3Z_HUMAN
1A02_HUMAN	CD8A_HUMAN
1A02_HUMAN	CD8B_HUMAN
1A02_HUMAN	PACS1_HUMAN
1A02_HUMAN	PDIA3_HUMAN
1A02_HUMAN	TCA_HUMAN
1A02_HUMAN	TCB_HUMAN
1A02_HUMAN	TVA1_HUMAN
1A02_HUMAN	TVA2_HUMAN
1A02_HUMAN	TVA3_HUMAN
1A02_HUMAN	TVB1_HUMAN
1A02_HUMAN	TVB2_HUMAN
1A03_HUMAN	B2MG_HUMAN
1A03_HUMAN	CD3D_HUMAN
1A03_HUMAN	CD3E_HUMAN
1A03_HUMAN	CD3G_HUMAN
1A03_HUMAN	CD3Z_HUMAN
1A03_HUMAN	CD8A_HUMAN
1A03_HUMAN	CD8B_HUMAN
1A03_HUMAN	KI3L2_HUMAN
1A03_HUMAN	Q6IPR8_HUMAN
1A03_HUMAN	TCA_HUMAN
1A03_HUMAN	TCB_HUMAN
1A03_HUMAN	TPSN_HUMAN
1A03_HUMAN	TVA1_HUMAN
1A03_HUMAN	TVA2_HUMAN
1A03_HUMAN	TVA3_HUMAN
1A03_HUMAN	TVB1_HUMAN
1A03_HUMAN	TVB2_HUMAN
1A1L1_HUMAN	FBF1_HUMAN
1A26_HUMAN	1A23_HUMAN
1A26_HUMAN	1C15_HUMAN
1A26_HUMAN	HYOU1_HUMAN
1A26_HUMAN	UGGG1_HUMAN
1A30_HUMAN	1A26_HUMAN
1A66_HUMAN	1A03_HUMAN
1A66_HUMAN	1A30_HUMAN
1A66_HUMAN	1A36_HUMAN
1A66_HUMAN	1B44_HUMAN
1A66_HUMAN	1C15_HUMAN
1A66_HUMAN	AT2A3_HUMAN
1A66_HUMAN	EFHD1_HUMAN
1A66_HUMAN	HLAG_HUMAN
1A66_HUMAN	HYOU1_HUMAN
1A66_HUMAN	Q860B5_HUMAN
1A66_HUMAN	Q9UEX5_HUMAN
1A66_HUMAN	QIL1_HUMAN
1A66_HUMAN	SMC2_HUMAN
1A66_HUMAN	SSRD_HUMAN
1A66_HUMAN	UGGG1_HUMAN
1A66_HUMAN	UGGG2_HUMAN
1A74_HUMAN	B2MG_HUMAN
1B07_HUMAN	B2MG_HUMAN
1B07_HUMAN	CD3D_HUMAN
1B07_HUMAN	CD3E_HUMAN
1B07_HUMAN	CD3G_HUMAN
1B07_HUMAN	CD3Z_HUMAN
1B07_HUMAN	CD8A_HUMAN
1B07_HUMAN	CD8B_HUMAN
1B07_HUMAN	KI3S1_HUMAN
1B07_HUMAN	KLRD1_HUMAN
1B07_HUMAN	LIRB1_HUMAN
1B07_HUMAN	MAGA1_HUMAN
1B07_HUMAN	TCA_HUMAN
1B07_HUMAN	TCB_HUMAN
1B07_HUMAN	TVA1_HUMAN
1B07_HUMAN	TVA2_HUMAN
1B07_HUMAN	TVA3_HUMAN
1B07_HUMAN	TVB1_HUMAN
1B07_HUMAN	TVB2_HUMAN
1B08_HUMAN	B2MG_HUMAN
1B08_HUMAN	CD3D_HUMAN
1B08_HUMAN	CD3E_HUMAN
1B08_HUMAN	CD3G_HUMAN
1B08_HUMAN	CD3Z_HUMAN
1B08_HUMAN	CD8A_HUMAN
1B08_HUMAN	CD8B_HUMAN
1B08_HUMAN	PP16A_HUMAN
1B08_HUMAN	TCA_HUMAN
1B08_HUMAN	TCB_HUMAN
1B08_HUMAN	TVA1_HUMAN
1B08_HUMAN	TVA2_HUMAN
1B08_HUMAN	TVA3_HUMAN
1B08_HUMAN	TVB1_HUMAN
1B08_HUMAN	TVB2_HUMAN
1B13_HUMAN	B2MG_HUMAN
1B13_HUMAN	CD3D_HUMAN
1B13_HUMAN	CD3E_HUMAN
1B13_HUMAN	CD3G_HUMAN
1B13_HUMAN	CD3Z_HUMAN
1B13_HUMAN	CD8A_HUMAN
1B13_HUMAN	CD8B_HUMAN
1B13_HUMAN	Q6VMQ6_HUMAN
1B13_HUMAN	TCA_HUMAN
1B13_HUMAN	TCB_HUMAN
1B13_HUMAN	TVA1_HUMAN
1B13_HUMAN	TVA2_HUMAN
1B13_HUMAN	TVA3_HUMAN
1B13_HUMAN	TVB1_HUMAN
1B13_HUMAN	TVB2_HUMAN
1B14_HUMAN	B2MG_HUMAN
1B14_HUMAN	CD3D_HUMAN
1B14_HUMAN	CD3E_HUMAN
1B14_HUMAN	CD3G_HUMAN
1B14_HUMAN	CD3Z_HUMAN
1B14_HUMAN	CD8A_HUMAN
1B14_HUMAN	CD8B_HUMAN
1B14_HUMAN	TCA_HUMAN
1B14_HUMAN	TCB_HUMAN
1B14_HUMAN	TVA1_HUMAN
1B14_HUMAN	TVA2_HUMAN
1B14_HUMAN	TVA3_HUMAN
1B14_HUMAN	TVB1_HUMAN
1B14_HUMAN	TVB2_HUMAN
1B15_HUMAN	B2MG_HUMAN
1B15_HUMAN	CD3D_HUMAN
1B15_HUMAN	CD3E_HUMAN
1B15_HUMAN	CD3G_HUMAN
1B15_HUMAN	CD3Z_HUMAN
1B15_HUMAN	CD8A_HUMAN
1B15_HUMAN	CD8B_HUMAN
1B15_HUMAN	TCA_HUMAN
1B15_HUMAN	TCB_HUMAN
1B15_HUMAN	TVA1_HUMAN
1B15_HUMAN	TVA2_HUMAN
1B15_HUMAN	TVA3_HUMAN
1B15_HUMAN	TVB1_HUMAN
1B15_HUMAN	TVB2_HUMAN
1B18_HUMAN	B2MG_HUMAN
1B18_HUMAN	CD3D_HUMAN
1B18_HUMAN	CD3E_HUMAN
1B18_HUMAN	CD3G_HUMAN
1B18_HUMAN	CD3Z_HUMAN
1B18_HUMAN	CD8A_HUMAN
1B18_HUMAN	CD8B_HUMAN
1B18_HUMAN	TCA_HUMAN
1B18_HUMAN	TCB_HUMAN
1B18_HUMAN	TVA1_HUMAN
1B18_HUMAN	TVA2_HUMAN
1B18_HUMAN	TVA3_HUMAN
1B18_HUMAN	TVB1_HUMAN
1B18_HUMAN	TVB2_HUMAN
1B27_HUMAN	B2MG_HUMAN
1B27_HUMAN	CD3D_HUMAN
1B27_HUMAN	CD3E_HUMAN
1B27_HUMAN	CD3G_HUMAN
1B27_HUMAN	CD3Z_HUMAN
1B27_HUMAN	CD8A_HUMAN
1B27_HUMAN	CD8B_HUMAN
1B27_HUMAN	LIRA1_HUMAN
1B27_HUMAN	LIRB1_HUMAN
1B27_HUMAN	LIRB2_HUMAN
1B27_HUMAN	TCA_HUMAN
1B27_HUMAN	TCB_HUMAN
1B27_HUMAN	TVA1_HUMAN
1B27_HUMAN	TVA2_HUMAN
1B27_HUMAN	TVA3_HUMAN
1B27_HUMAN	TVB1_HUMAN
1B27_HUMAN	TVB2_HUMAN
1B35_HUMAN	B2MG_HUMAN
1B35_HUMAN	CD3D_HUMAN
1B35_HUMAN	CD3E_HUMAN
1B35_HUMAN	CD3G_HUMAN
1B35_HUMAN	CD3Z_HUMAN
1B35_HUMAN	CD8A_HUMAN
1B35_HUMAN	CD8B_HUMAN
1B35_HUMAN	TCA_HUMAN
1B35_HUMAN	TCB_HUMAN
1B35_HUMAN	TVA1_HUMAN
1B35_HUMAN	TVA2_HUMAN
1B35_HUMAN	TVA3_HUMAN
1B35_HUMAN	TVB1_HUMAN
1B35_HUMAN	TVB2_HUMAN
1B37_HUMAN	B2MG_HUMAN
1B37_HUMAN	CD3D_HUMAN
1B37_HUMAN	CD3E_HUMAN
1B37_HUMAN	CD3G_HUMAN
1B37_HUMAN	CD3Z_HUMAN
1B37_HUMAN	CD8A_HUMAN
1B37_HUMAN	CD8B_HUMAN
1B37_HUMAN	TCA_HUMAN
1B37_HUMAN	TCB_HUMAN
1B37_HUMAN	TVA1_HUMAN
1B37_HUMAN	TVA2_HUMAN
1B37_HUMAN	TVA3_HUMAN
1B37_HUMAN	TVB1_HUMAN
1B37_HUMAN	TVB2_HUMAN
1B39_HUMAN	B2MG_HUMAN
1B39_HUMAN	CD3D_HUMAN
1B39_HUMAN	CD3E_HUMAN
1B39_HUMAN	CD3G_HUMAN
1B39_HUMAN	CD3Z_HUMAN
1B39_HUMAN	CD8A_HUMAN
1B39_HUMAN	CD8B_HUMAN
1B39_HUMAN	TCA_HUMAN
1B39_HUMAN	TCB_HUMAN
1B39_HUMAN	TVA1_HUMAN
1B39_HUMAN	TVA2_HUMAN
1B39_HUMAN	TVA3_HUMAN
1B39_HUMAN	TVB1_HUMAN
1B39_HUMAN	TVB2_HUMAN
1B40_HUMAN	B2MG_HUMAN
1B40_HUMAN	CD3D_HUMAN
1B40_HUMAN	CD3E_HUMAN
1B40_HUMAN	CD3G_HUMAN
1B40_HUMAN	CD3Z_HUMAN
1B40_HUMAN	CD8A_HUMAN
1B40_HUMAN	CD8B_HUMAN
1B40_HUMAN	TCA_HUMAN
1B40_HUMAN	TCB_HUMAN
1B40_HUMAN	TVA1_HUMAN
1B40_HUMAN	TVA2_HUMAN
1B40_HUMAN	TVA3_HUMAN
1B40_HUMAN	TVB1_HUMAN
1B40_HUMAN	TVB2_HUMAN
1B41_HUMAN	B2MG_HUMAN
1B41_HUMAN	CD3D_HUMAN
1B41_HUMAN	CD3E_HUMAN
1B41_HUMAN	CD3G_HUMAN
1B41_HUMAN	CD3Z_HUMAN
1B41_HUMAN	CD8A_HUMAN
1B41_HUMAN	CD8B_HUMAN
1B41_HUMAN	TCA_HUMAN
1B41_HUMAN	TCB_HUMAN
1B41_HUMAN	TVA1_HUMAN
1B41_HUMAN	TVA2_HUMAN
1B41_HUMAN	TVA3_HUMAN
1B41_HUMAN	TVB1_HUMAN
1B41_HUMAN	TVB2_HUMAN
1B42_HUMAN	6PGD_HUMAN
1B42_HUMAN	AAAT_HUMAN
1B42_HUMAN	AATC_HUMAN
1B42_HUMAN	ACPH_HUMAN
1B42_HUMAN	ACTZ_HUMAN
1B42_HUMAN	ADPPT_HUMAN
1B42_HUMAN	AHSA1_HUMAN
1B42_HUMAN	AIFM1_HUMAN
1B42_HUMAN	AIMP1_HUMAN
1B42_HUMAN	AL9A1_HUMAN
1B42_HUMAN	ALDR_HUMAN
1B42_HUMAN	ANXA2_HUMAN
1B42_HUMAN	APEX1_HUMAN
1B42_HUMAN	ARF6_HUMAN
1B42_HUMAN	ARK72_HUMAN
1B42_HUMAN	ARL1_HUMAN
1B42_HUMAN	ARP2_HUMAN
1B42_HUMAN	ARPC2_HUMAN
1B42_HUMAN	ATP5L_HUMAN
1B42_HUMAN	B2MG_HUMAN
1B42_HUMAN	BAF_HUMAN
1B42_HUMAN	BAP31_HUMAN
1B42_HUMAN	BTF3_HUMAN
1B42_HUMAN	C1TC_HUMAN
1B42_HUMAN	CALM_HUMAN
1B42_HUMAN	CAPR1_HUMAN
1B42_HUMAN	CAZA1_HUMAN
1B42_HUMAN	CBR1_HUMAN
1B42_HUMAN	CD2A1_HUMAN
1B42_HUMAN	CD3D_HUMAN
1B42_HUMAN	CD3E_HUMAN
1B42_HUMAN	CD3G_HUMAN
1B42_HUMAN	CD3Z_HUMAN
1B42_HUMAN	CD81_HUMAN
1B42_HUMAN	CD8A_HUMAN
1B42_HUMAN	CD8B_HUMAN
1B42_HUMAN	CH10_HUMAN
1B42_HUMAN	CISY_HUMAN
1B42_HUMAN	CLPP_HUMAN
1B42_HUMAN	COPG_HUMAN
1B42_HUMAN	CPSF6_HUMAN
1B42_HUMAN	CRK_HUMAN
1B42_HUMAN	CSDE1_HUMAN
1B42_HUMAN	CYBP_HUMAN
1B42_HUMAN	CYC_HUMAN
1B42_HUMAN	CYTB_HUMAN
1B42_HUMAN	DAD1_HUMAN
1B42_HUMAN	DBLOH_HUMAN
1B42_HUMAN	DCTP1_HUMAN
1B42_HUMAN	DDX21_HUMAN
1B42_HUMAN	DHSA_HUMAN
1B42_HUMAN	DHX9_HUMAN
1B42_HUMAN	DLRB1_HUMAN
1B42_HUMAN	DNJA1_HUMAN
1B42_HUMAN	DOPD_HUMAN
1B42_HUMAN	DRG1_HUMAN
1B42_HUMAN	DUS3_HUMAN
1B42_HUMAN	DYL1_HUMAN
1B42_HUMAN	ECHA_HUMAN
1B42_HUMAN	ECHM_HUMAN
1B42_HUMAN	EF1B_HUMAN
1B42_HUMAN	EF1D_HUMAN
1B42_HUMAN	EFTU_HUMAN
1B42_HUMAN	EIF3F_HUMAN
1B42_HUMAN	EIF3H_HUMAN
1B42_HUMAN	EIF3I_HUMAN
1B42_HUMAN	ERF3A_HUMAN
1B42_HUMAN	ERP29_HUMAN
1B42_HUMAN	ESTD_HUMAN
1B42_HUMAN	EXOS4_HUMAN
1B42_HUMAN	EZRI_HUMAN
1B42_HUMAN	FETA_HUMAN
1B42_HUMAN	FHL1_HUMAN
1B42_HUMAN	FKBP3_HUMAN
1B42_HUMAN	FSCN1_HUMAN
1B42_HUMAN	FUS_HUMAN
1B42_HUMAN	GANAB_HUMAN
1B42_HUMAN	GDIA_HUMAN
1B42_HUMAN	GFPT1_HUMAN
1B42_HUMAN	GLNA_HUMAN
1B42_HUMAN	GLRX5_HUMAN
1B42_HUMAN	GLYM_HUMAN
1B42_HUMAN	GRPE1_HUMAN
1B42_HUMAN	GUAA_HUMAN
1B42_HUMAN	HBA_HUMAN
1B42_HUMAN	HINT1_HUMAN
1B42_HUMAN	HNRPM_HUMAN
1B42_HUMAN	HNRPQ_HUMAN
1B42_HUMAN	HPRT_HUMAN
1B42_HUMAN	HS74L_HUMAN
1B42_HUMAN	IF2B1_HUMAN
1B42_HUMAN	IF2G_HUMAN
1B42_HUMAN	IMA3_HUMAN
1B42_HUMAN	K6PL_HUMAN
1B42_HUMAN	K6PP_HUMAN
1B42_HUMAN	KCD12_HUMAN
1B42_HUMAN	KCRU_HUMAN
1B42_HUMAN	LAGE3_HUMAN
1B42_HUMAN	LKHA4_HUMAN
1B42_HUMAN	LMNB1_HUMAN
1B42_HUMAN	LPPRC_HUMAN
1B42_HUMAN	LRC40_HUMAN
1B42_HUMAN	LRC59_HUMAN
1B42_HUMAN	MARE1_HUMAN
1B42_HUMAN	MCM3_HUMAN
1B42_HUMAN	MCM6_HUMAN
1B42_HUMAN	MCM7_HUMAN
1B42_HUMAN	MCTS1_HUMAN
1B42_HUMAN	MIF_HUMAN
1B42_HUMAN	MK01_HUMAN
1B42_HUMAN	MOES_HUMAN
1B42_HUMAN	MP2K1_HUMAN
1B42_HUMAN	MTPN_HUMAN
1B42_HUMAN	MYL6_HUMAN
1B42_HUMAN	NACP1_HUMAN
1B42_HUMAN	NARG1_HUMAN
1B42_HUMAN	NASP_HUMAN
1B42_HUMAN	NDUS1_HUMAN
1B42_HUMAN	NPM_HUMAN
1B42_HUMAN	NU155_HUMAN
1B42_HUMAN	NUDC_HUMAN
1B42_HUMAN	NUDT5_HUMAN
1B42_HUMAN	OAT_HUMAN
1B42_HUMAN	OST48_HUMAN
1B42_HUMAN	PA2G4_HUMAN
1B42_HUMAN	PABP1_HUMAN
1B42_HUMAN	PCBP1_HUMAN
1B42_HUMAN	PCNA_HUMAN
1B42_HUMAN	PDC6I_HUMAN
1B42_HUMAN	PDCD5_HUMAN
1B42_HUMAN	PDIA4_HUMAN
1B42_HUMAN	PEBP1_HUMAN
1B42_HUMAN	PGRC1_HUMAN
1B42_HUMAN	PIMT_HUMAN
1B42_HUMAN	PLST_HUMAN
1B42_HUMAN	PNPH_HUMAN
1B42_HUMAN	PP2AB_HUMAN
1B42_HUMAN	PPCE_HUMAN
1B42_HUMAN	PPIB_HUMAN
1B42_HUMAN	PROF2_HUMAN
1B42_HUMAN	PRS10_HUMAN
1B42_HUMAN	PRS4_HUMAN
1B42_HUMAN	PSA1_HUMAN
1B42_HUMAN	PSA6_HUMAN
1B42_HUMAN	PSA7_HUMAN
1B42_HUMAN	PSA_HUMAN
1B42_HUMAN	PSB1_HUMAN
1B42_HUMAN	PSB3_HUMAN
1B42_HUMAN	PSB4_HUMAN
1B42_HUMAN	PSB6_HUMAN
1B42_HUMAN	PSD13_HUMAN
1B42_HUMAN	PSMD1_HUMAN
1B42_HUMAN	PSMD2_HUMAN
1B42_HUMAN	PSMD3_HUMAN
1B42_HUMAN	PSMD4_HUMAN
1B42_HUMAN	PSMD6_HUMAN
1B42_HUMAN	PSME3_HUMAN
1B42_HUMAN	PUR4_HUMAN
1B42_HUMAN	PUR6_HUMAN
1B42_HUMAN	PURA2_HUMAN
1B42_HUMAN	PYRG1_HUMAN
1B42_HUMAN	Q5SQT9_HUMAN
1B42_HUMAN	Q5T081_HUMAN
1B42_HUMAN	Q6FGD7_HUMAN
1B42_HUMAN	Q6FGH5_HUMAN
1B42_HUMAN	Q6FHQ0_HUMAN
1B42_HUMAN	Q6FHT8_HUMAN
1B42_HUMAN	Q6PKD3_HUMAN
1B42_HUMAN	Q86YI5_HUMAN
1B42_HUMAN	Q9NZ23_HUMAN
1B42_HUMAN	QCR2_HUMAN
1B42_HUMAN	RAB14_HUMAN
1B42_HUMAN	RAB1B_HUMAN
1B42_HUMAN	RAB21_HUMAN
1B42_HUMAN	RAB2A_HUMAN
1B42_HUMAN	RAB5C_HUMAN
1B42_HUMAN	RAB6A_HUMAN
1B42_HUMAN	RAB7A_HUMAN
1B42_HUMAN	RANG_HUMAN
1B42_HUMAN	RBBP4_HUMAN
1B42_HUMAN	RCC2_HUMAN
1B42_HUMAN	RHOA_HUMAN
1B42_HUMAN	RIR1_HUMAN
1B42_HUMAN	RL23A_HUMAN
1B42_HUMAN	RL24_HUMAN
1B42_HUMAN	RL29_HUMAN
1B42_HUMAN	RL32_HUMAN
1B42_HUMAN	RL37A_HUMAN
1B42_HUMAN	RL38_HUMAN
1B42_HUMAN	RM40_HUMAN
1B42_HUMAN	RPN1_HUMAN
1B42_HUMAN	RS14_HUMAN
1B42_HUMAN	RS9_HUMAN
1B42_HUMAN	RU2A_HUMAN
1B42_HUMAN	RU2B_HUMAN
1B42_HUMAN	RUVB1_HUMAN
1B42_HUMAN	RUVB2_HUMAN
1B42_HUMAN	S10AB_HUMAN
1B42_HUMAN	SAE2_HUMAN
1B42_HUMAN	SAHH_HUMAN
1B42_HUMAN	SBDS_HUMAN
1B42_HUMAN	SC11A_HUMAN
1B42_HUMAN	SC23A_HUMAN
1B42_HUMAN	SEC13_HUMAN
1B42_HUMAN	SEC63_HUMAN
1B42_HUMAN	SEPT2_HUMAN
1B42_HUMAN	SET_HUMAN
1B42_HUMAN	SFXN1_HUMAN
1B42_HUMAN	SGTA_HUMAN
1B42_HUMAN	SLIRP_HUMAN
1B42_HUMAN	SMAP_HUMAN
1B42_HUMAN	SMC2_HUMAN
1B42_HUMAN	SMC3_HUMAN
1B42_HUMAN	SND1_HUMAN
1B42_HUMAN	SNX3_HUMAN
1B42_HUMAN	SODM_HUMAN
1B42_HUMAN	SP16H_HUMAN
1B42_HUMAN	SRP14_HUMAN
1B42_HUMAN	SRP68_HUMAN
1B42_HUMAN	SSA27_HUMAN
1B42_HUMAN	SSRA_HUMAN
1B42_HUMAN	STMN1_HUMAN
1B42_HUMAN	STRAP_HUMAN
1B42_HUMAN	SYG_HUMAN
1B42_HUMAN	SYIM_HUMAN
1B42_HUMAN	SYMC_HUMAN
1B42_HUMAN	SYRC_HUMAN
1B42_HUMAN	SYTC_HUMAN
1B42_HUMAN	SYVC_HUMAN
1B42_HUMAN	TADBP_HUMAN
1B42_HUMAN	TAGL2_HUMAN
1B42_HUMAN	TBCE_HUMAN
1B42_HUMAN	TCA_HUMAN
1B42_HUMAN	TCB_HUMAN
1B42_HUMAN	TCTP_HUMAN
1B42_HUMAN	TEBP_HUMAN
1B42_HUMAN	TFR1_HUMAN
1B42_HUMAN	THIC_HUMAN
1B42_HUMAN	THIL_HUMAN
1B42_HUMAN	TIF1B_HUMAN
1B42_HUMAN	TIM13_HUMAN
1B42_HUMAN	TKT_HUMAN
1B42_HUMAN	TOM40_HUMAN
1B42_HUMAN	TPM3_HUMAN
1B42_HUMAN	TPP2_HUMAN
1B42_HUMAN	TR112_HUMAN
1B42_HUMAN	TRAP1_HUMAN
1B42_HUMAN	TRIPB_HUMAN
1B42_HUMAN	TSN_HUMAN
1B42_HUMAN	TTL12_HUMAN
1B42_HUMAN	TVA1_HUMAN
1B42_HUMAN	TVA2_HUMAN
1B42_HUMAN	TVA3_HUMAN
1B42_HUMAN	TVB1_HUMAN
1B42_HUMAN	TVB2_HUMAN
1B42_HUMAN	TXD17_HUMAN
1B42_HUMAN	TXTP_HUMAN
1B42_HUMAN	UB2D3_HUMAN
1B42_HUMAN	UBE2K_HUMAN
1B42_HUMAN	VATA_HUMAN
1B42_HUMAN	VDAC1_HUMAN
1B42_HUMAN	VDAC3_HUMAN
1B42_HUMAN	VMA21_HUMAN
1B42_HUMAN	VPS35_HUMAN
1B42_HUMAN	WDR48_HUMAN
1B44_HUMAN	B2MG_HUMAN
1B44_HUMAN	CD3D_HUMAN
1B44_HUMAN	CD3E_HUMAN
1B44_HUMAN	CD3G_HUMAN
1B44_HUMAN	CD3Z_HUMAN
1B44_HUMAN	CD8A_HUMAN
1B44_HUMAN	CD8B_HUMAN
1B44_HUMAN	TCA_HUMAN
1B44_HUMAN	TCB_HUMAN
1B44_HUMAN	TVA1_HUMAN
1B44_HUMAN	TVA2_HUMAN
1B44_HUMAN	TVA3_HUMAN
1B44_HUMAN	TVB1_HUMAN
1B44_HUMAN	TVB2_HUMAN
1B45_HUMAN	B2MG_HUMAN
1B45_HUMAN	CD3E_HUMAN
1B46_HUMAN	B2MG_HUMAN
1B46_HUMAN	CD3D_HUMAN
1B46_HUMAN	CD3E_HUMAN
1B46_HUMAN	CD3G_HUMAN
1B46_HUMAN	CD3Z_HUMAN
1B46_HUMAN	CD8A_HUMAN
1B46_HUMAN	CD8B_HUMAN
1B46_HUMAN	TCA_HUMAN
1B46_HUMAN	TCB_HUMAN
1B46_HUMAN	TVA1_HUMAN
1B46_HUMAN	TVA2_HUMAN
1B46_HUMAN	TVA3_HUMAN
1B46_HUMAN	TVB1_HUMAN
1B46_HUMAN	TVB2_HUMAN
1B47_HUMAN	B2MG_HUMAN
1B47_HUMAN	CD3E_HUMAN
1B49_HUMAN	B2MG_HUMAN
1B49_HUMAN	CD3D_HUMAN
1B49_HUMAN	CD3E_HUMAN
1B49_HUMAN	CD3G_HUMAN
1B49_HUMAN	CD3Z_HUMAN
1B49_HUMAN	CD8A_HUMAN
1B49_HUMAN	CD8B_HUMAN
1B49_HUMAN	TCA_HUMAN
1B49_HUMAN	TCB_HUMAN
1B49_HUMAN	TVA1_HUMAN
1B49_HUMAN	TVA2_HUMAN
1B49_HUMAN	TVA3_HUMAN
1B49_HUMAN	TVB1_HUMAN
1B49_HUMAN	TVB2_HUMAN
1B50_HUMAN	B2MG_HUMAN
1B50_HUMAN	CD3E_HUMAN
1B51_HUMAN	B2MG_HUMAN
1B51_HUMAN	CD3D_HUMAN
1B51_HUMAN	CD3E_HUMAN
1B51_HUMAN	CD3G_HUMAN
1B51_HUMAN	CD3Z_HUMAN
1B51_HUMAN	CD8A_HUMAN
1B51_HUMAN	CD8B_HUMAN
1B51_HUMAN	TCA_HUMAN
1B51_HUMAN	TCB_HUMAN
1B51_HUMAN	TVA1_HUMAN
1B51_HUMAN	TVA2_HUMAN
1B51_HUMAN	TVA3_HUMAN
1B51_HUMAN	TVB1_HUMAN
[truncated: 142,926 more rows]

## Sheet: PPI network for HCC hub protein
Node A	Node B
1433B_HUMAN	1433G_HUMAN
1433B_HUMAN	1433T_HUMAN
1433B_HUMAN	1433Z_HUMAN
1433B_HUMAN	AKP13_HUMAN
1433B_HUMAN	AKT1_HUMAN
1433B_HUMAN	ATPA_HUMAN
1433B_HUMAN	BAD_HUMAN
1433B_HUMAN	BCL2_HUMAN
1433B_HUMAN	BCLX_HUMAN
1433B_HUMAN	BCR_HUMAN
1433B_HUMAN	CRK_HUMAN
1433B_HUMAN	CSK21_HUMAN
1433B_HUMAN	DFFA_HUMAN
1433B_HUMAN	DYR1A_HUMAN
1433B_HUMAN	EGFR_HUMAN
1433B_HUMAN	EGF_HUMAN
1433B_HUMAN	GRB2_HUMAN
1433B_HUMAN	GRP78_HUMAN
1433B_HUMAN	HS90A_HUMAN
1433B_HUMAN	HS90B_HUMAN
1433B_HUMAN	HSP71_HUMAN
1433B_HUMAN	HSP74_HUMAN
1433B_HUMAN	INSR_HUMAN
1433B_HUMAN	IRS1_HUMAN
1433B_HUMAN	IRS2_HUMAN
1433B_HUMAN	ITB1_HUMAN
1433B_HUMAN	K1C18_HUMAN
1433B_HUMAN	KS6A1_HUMAN
1433B_HUMAN	MK01_HUMAN
1433B_HUMAN	MK03_HUMAN
1433B_HUMAN	NCKP1_HUMAN
1433B_HUMAN	NGF_HUMAN
1433B_HUMAN	NTRK1_HUMAN
1433B_HUMAN	P85B_HUMAN
1433B_HUMAN	PDE3B_HUMAN
1433B_HUMAN	PRKDC_HUMAN
1433B_HUMAN	RAP1A_HUMAN
1433B_HUMAN	RASH_HUMAN
1433B_HUMAN	RASK_HUMAN
1433B_HUMAN	RASN_HUMAN
1433B_HUMAN	RGAP1_HUMAN
1433B_HUMAN	RNPS1_HUMAN
1433B_HUMAN	SAP18_HUMAN
1433B_HUMAN	SFRS3_HUMAN
1433B_HUMAN	SHC1_HUMAN
1433B_HUMAN	SOS1_HUMAN
1433B_HUMAN	SRC_HUMAN
1433B_HUMAN	TBA1A_HUMAN
1433B_HUMAN	TBB5_HUMAN
1433B_HUMAN	TESK1_HUMAN
1433B_HUMAN	TSC1_HUMAN
1433B_HUMAN	U520_HUMAN
1433B_HUMAN	U5S1_HUMAN
1433B_HUMAN	UBIQ_HUMAN
1433B_HUMAN	UCP2_HUMAN
1433B_HUMAN	UCP3_HUMAN
1433B_HUMAN	WDR6_HUMAN
1433B_HUMAN	WEE1_HUMAN
1433E_HUMAN	1433G_HUMAN
1433E_HUMAN	2AAA_HUMAN
1433E_HUMAN	ACTZ_HUMAN
1433E_HUMAN	AKAP9_HUMAN
1433E_HUMAN	ALMS1_HUMAN
1433E_HUMAN	BAD_HUMAN
1433E_HUMAN	CALM_HUMAN
1433E_HUMAN	CASP2_HUMAN
1433E_HUMAN	CDC2_HUMAN
1433E_HUMAN	CDN1B_HUMAN
1433E_HUMAN	CE152_HUMAN
1433E_HUMAN	CE164_HUMAN
1433E_HUMAN	CENPJ_HUMAN
1433E_HUMAN	CETN2_HUMAN
1433E_HUMAN	CK5P2_HUMAN
1433E_HUMAN	CKAP5_HUMAN
1433E_HUMAN	CLAP1_HUMAN
1433E_HUMAN	CP135_HUMAN
1433E_HUMAN	DCTN2_HUMAN
1433E_HUMAN	DISC1_HUMAN
1433E_HUMAN	DYHC1_HUMAN
1433E_HUMAN	DYL1_HUMAN
1433E_HUMAN	DYR1A_HUMAN
1433E_HUMAN	FR1OP_HUMAN
1433E_HUMAN	GCP2_HUMAN
1433E_HUMAN	GRAP2_HUMAN
1433E_HUMAN	HDAC4_HUMAN
1433E_HUMAN	HS90A_HUMAN
1433E_HUMAN	IGF1R_HUMAN
1433E_HUMAN	IRS1_HUMAN
1433E_HUMAN	IRS2_HUMAN
1433E_HUMAN	K1C18_HUMAN
1433E_HUMAN	KAP3_HUMAN
1433E_HUMAN	KAPCA_HUMAN
1433E_HUMAN	KC1D_HUMAN
1433E_HUMAN	KC1E_HUMAN
1433E_HUMAN	LIS1_HUMAN
1433E_HUMAN	MARE1_HUMAN
1433E_HUMAN	NDE1_HUMAN
1433E_HUMAN	NEK2_HUMAN
1433E_HUMAN	NGF_HUMAN
1433E_HUMAN	NINL_HUMAN
1433E_HUMAN	OFD1_HUMAN
1433E_HUMAN	PCNT_HUMAN
1433E_HUMAN	PLK1_HUMAN
1433E_HUMAN	PLK4_HUMAN
1433E_HUMAN	RAF1_HUMAN
1433E_HUMAN	SRC_HUMAN
1433E_HUMAN	TBA1A_HUMAN
1433E_HUMAN	TBA4A_HUMAN
1433E_HUMAN	TBB2C_HUMAN
1433E_HUMAN	TBB4_HUMAN
1433E_HUMAN	TBB5_HUMAN
1433E_HUMAN	TBG1_HUMAN
1433E_HUMAN	TBG2_HUMAN
1433E_HUMAN	TBP_HUMAN
1433E_HUMAN	TGFB1_HUMAN
1433E_HUMAN	TNR16_HUMAN
1433E_HUMAN	TOP2A_HUMAN
1433E_HUMAN	TSC1_HUMAN
1433F_HUMAN	1433B_HUMAN
1433F_HUMAN	1433G_HUMAN
1433F_HUMAN	1433T_HUMAN
1433F_HUMAN	1433Z_HUMAN
1433F_HUMAN	ADT3_HUMAN
1433F_HUMAN	ARHG2_HUMAN
1433F_HUMAN	ASPP2_HUMAN
1433F_HUMAN	BAD_HUMAN
1433F_HUMAN	CBP_HUMAN
1433F_HUMAN	CDC7_HUMAN
1433F_HUMAN	CDN1B_HUMAN
1433F_HUMAN	CHK1_HUMAN
1433F_HUMAN	CLAP1_HUMAN
1433F_HUMAN	CLAP2_HUMAN
1433F_HUMAN	DRD4_HUMAN
1433F_HUMAN	ESR1_HUMAN
1433F_HUMAN	GCR_HUMAN
1433F_HUMAN	HDAC4_HUMAN
1433F_HUMAN	HSP74_HUMAN
1433F_HUMAN	HSP7C_HUMAN
1433F_HUMAN	IRS2_HUMAN
1433F_HUMAN	JUN_HUMAN
1433F_HUMAN	K1C18_HUMAN
1433F_HUMAN	KC1E_HUMAN
1433F_HUMAN	KCC2G_HUMAN
1433F_HUMAN	KIF1B_HUMAN
1433F_HUMAN	MPIP3_HUMAN
1433F_HUMAN	NCOA2_HUMAN
1433F_HUMAN	NCOA3_HUMAN
1433F_HUMAN	NP1L1_HUMAN
1433F_HUMAN	PDPK1_HUMAN
1433F_HUMAN	RFC4_HUMAN
1433F_HUMAN	SRC_HUMAN
1433F_HUMAN	TBB4_HUMAN
1433F_HUMAN	TBG1_HUMAN
1433F_HUMAN	TIAM1_HUMAN
1433F_HUMAN	TSC1_HUMAN
1433G_HUMAN	1433T_HUMAN
1433G_HUMAN	1433Z_HUMAN
1433G_HUMAN	2AAA_HUMAN
1433G_HUMAN	41_HUMAN
1433G_HUMAN	ACTZ_HUMAN
1433G_HUMAN	AKAP9_HUMAN
1433G_HUMAN	AKP13_HUMAN
1433G_HUMAN	ALBU_HUMAN
1433G_HUMAN	ALMS1_HUMAN
1433G_HUMAN	ARHG2_HUMAN
1433G_HUMAN	ARHG7_HUMAN
1433G_HUMAN	ATPA_HUMAN
1433G_HUMAN	ATPB_HUMAN
1433G_HUMAN	CALM_HUMAN
1433G_HUMAN	CCNB1_HUMAN
1433G_HUMAN	CCNB2_HUMAN
1433G_HUMAN	CDC2_HUMAN
1433G_HUMAN	CDN1B_HUMAN
1433G_HUMAN	CE152_HUMAN
1433G_HUMAN	CE164_HUMAN
1433G_HUMAN	CENPJ_HUMAN
1433G_HUMAN	CETN2_HUMAN
1433G_HUMAN	CFP1_HUMAN
1433G_HUMAN	CK5P2_HUMAN
1433G_HUMAN	CKAP5_HUMAN
1433G_HUMAN	CLAP1_HUMAN
1433G_HUMAN	CLK2_HUMAN
1433G_HUMAN	COF1_HUMAN
1433G_HUMAN	CP135_HUMAN
1433G_HUMAN	CRYAB_HUMAN
1433G_HUMAN	DCTN2_HUMAN
1433G_HUMAN	DDX5_HUMAN
1433G_HUMAN	DFFA_HUMAN
1433G_HUMAN	DISC1_HUMAN
1433G_HUMAN	DYHC1_HUMAN
1433G_HUMAN	DYL1_HUMAN
1433G_HUMAN	DYR1A_HUMAN
1433G_HUMAN	EF1G_HUMAN
1433G_HUMAN	FNBP3_HUMAN
1433G_HUMAN	FOXO1_HUMAN
1433G_HUMAN	FR1OP_HUMAN
1433G_HUMAN	GCP2_HUMAN
1433G_HUMAN	GRP75_HUMAN
1433G_HUMAN	HDAC4_HUMAN
1433G_HUMAN	HNRH1_HUMAN
1433G_HUMAN	HS90A_HUMAN
1433G_HUMAN	HSP71_HUMAN
1433G_HUMAN	HSP74_HUMAN
1433G_HUMAN	IGF1R_HUMAN
1433G_HUMAN	IRS2_HUMAN
1433G_HUMAN	K1C18_HUMAN
1433G_HUMAN	KAP3_HUMAN
1433G_HUMAN	KAPCA_HUMAN
1433G_HUMAN	KC1D_HUMAN
1433G_HUMAN	KC1E_HUMAN
1433G_HUMAN	KIF1B_HUMAN
1433G_HUMAN	KPCA_HUMAN
1433G_HUMAN	KPCD_HUMAN
1433G_HUMAN	LC7L2_HUMAN
1433G_HUMAN	LIS1_HUMAN
1433G_HUMAN	LRP1_HUMAN
1433G_HUMAN	MA32_HUMAN
1433G_HUMAN	MARE1_HUMAN
1433G_HUMAN	MGN_HUMAN
1433G_HUMAN	NCBP1_HUMAN
1433G_HUMAN	NCKP1_HUMAN
1433G_HUMAN	NDE1_HUMAN
1433G_HUMAN	NDRG1_HUMAN
1433G_HUMAN	NEK2_HUMAN
1433G_HUMAN	NELFE_HUMAN
1433G_HUMAN	NINL_HUMAN
1433G_HUMAN	OFD1_HUMAN
1433G_HUMAN	P85A_HUMAN
1433G_HUMAN	PABP1_HUMAN
1433G_HUMAN	PABP2_HUMAN
1433G_HUMAN	PCNT_HUMAN
1433G_HUMAN	PLK1_HUMAN
1433G_HUMAN	PLK4_HUMAN
1433G_HUMAN	PR40A_HUMAN
1433G_HUMAN	PRKDC_HUMAN
1433G_HUMAN	PRP4B_HUMAN
1433G_HUMAN	PUF60_HUMAN
1433G_HUMAN	RAF1_HUMAN
1433G_HUMAN	RGAP1_HUMAN
1433G_HUMAN	RL3_HUMAN
1433G_HUMAN	RNPS1_HUMAN
1433G_HUMAN	SAP18_HUMAN
1433G_HUMAN	SF3B1_HUMAN
1433G_HUMAN	SF3B3_HUMAN
1433G_HUMAN	SFR11_HUMAN
1433G_HUMAN	SFRS1_HUMAN
1433G_HUMAN	SFRS3_HUMAN
1433G_HUMAN	SFRS4_HUMAN
1433G_HUMAN	SFRS6_HUMAN
1433G_HUMAN	SPTB2_HUMAN
1433G_HUMAN	SRC_HUMAN
1433G_HUMAN	SRRM1_HUMAN
1433G_HUMAN	TBA1A_HUMAN
1433G_HUMAN	TBA4A_HUMAN
1433G_HUMAN	TBB2C_HUMAN
1433G_HUMAN	TBB4_HUMAN
1433G_HUMAN	TBB5_HUMAN
1433G_HUMAN	TBG1_HUMAN
1433G_HUMAN	TBG2_HUMAN
1433G_HUMAN	TIAM1_HUMAN
1433G_HUMAN	TPM1_HUMAN
1433G_HUMAN	TSC1_HUMAN
1433G_HUMAN	U520_HUMAN
1433G_HUMAN	U5S1_HUMAN
1433G_HUMAN	UBIQ_HUMAN
1433G_HUMAN	UCP2_HUMAN
1433G_HUMAN	UCP3_HUMAN
1433G_HUMAN	VIME_HUMAN
1433S_HUMAN	1433G_HUMAN
1433S_HUMAN	APC_HUMAN
1433S_HUMAN	CAV1_HUMAN
1433S_HUMAN	CDC2_HUMAN
1433S_HUMAN	CSK21_HUMAN
1433S_HUMAN	DYR1A_HUMAN
1433S_HUMAN	ERRFI_HUMAN
1433S_HUMAN	GBLP_HUMAN
1433S_HUMAN	HDAC4_HUMAN
1433S_HUMAN	HNRPU_HUMAN
1433S_HUMAN	IF4H_HUMAN
1433S_HUMAN	IRS1_HUMAN
1433S_HUMAN	IRS2_HUMAN
1433S_HUMAN	K1C18_HUMAN
1433S_HUMAN	LIS1_HUMAN
1433S_HUMAN	MPIP2_HUMAN
1433S_HUMAN	P53_HUMAN
1433S_HUMAN	PLK4_HUMAN
1433S_HUMAN	RAF1_HUMAN
1433S_HUMAN	RB11A_HUMAN
1433S_HUMAN	RGAP1_HUMAN
1433S_HUMAN	SMUF2_HUMAN
1433S_HUMAN	THAP1_HUMAN
1433S_HUMAN	WEE1_HUMAN
1433T_HUMAN	1433Z_HUMAN
1433T_HUMAN	BAD_HUMAN
1433T_HUMAN	CBL_HUMAN
1433T_HUMAN	CDN1B_HUMAN
1433T_HUMAN	CSK_HUMAN
1433T_HUMAN	DDX6_HUMAN
1433T_HUMAN	DFFA_HUMAN
1433T_HUMAN	DISC1_HUMAN
1433T_HUMAN	FGR_HUMAN
1433T_HUMAN	FRAP_HUMAN
1433T_HUMAN	HSP71_HUMAN
1433T_HUMAN	HSP74_HUMAN
1433T_HUMAN	HSP7C_HUMAN
1433T_HUMAN	IRS2_HUMAN
1433T_HUMAN	KSYK_HUMAN
1433T_HUMAN	LC7L2_HUMAN
1433T_HUMAN	LYN_HUMAN
1433T_HUMAN	MGN_HUMAN
1433T_HUMAN	MPIP2_HUMAN
1433T_HUMAN	P53_HUMAN
1433T_HUMAN	PDPK1_HUMAN
1433T_HUMAN	PK3CB_HUMAN
1433T_HUMAN	PTN1_HUMAN
1433T_HUMAN	RAF1_HUMAN
1433T_HUMAN	SFRS1_HUMAN
1433T_HUMAN	SFRS3_HUMAN
1433T_HUMAN	SFRS6_HUMAN
1433T_HUMAN	TBA3C_HUMAN
1433T_HUMAN	TERT_HUMAN
1433T_HUMAN	TSC1_HUMAN
1433T_HUMAN	UCP2_HUMAN
1433T_HUMAN	UCP3_HUMAN
1433Z_HUMAN	1433E_HUMAN
1433Z_HUMAN	1433S_HUMAN
1433Z_HUMAN	ACTB_HUMAN
1433Z_HUMAN	ACTN4_HUMAN
1433Z_HUMAN	ADA2A_HUMAN
1433Z_HUMAN	ADA2B_HUMAN
1433Z_HUMAN	ADA2C_HUMAN
1433Z_HUMAN	AKP13_HUMAN
1433Z_HUMAN	AKT1_HUMAN
1433Z_HUMAN	ALDOA_HUMAN
1433Z_HUMAN	ANXA2_HUMAN
1433Z_HUMAN	APC_HUMAN
1433Z_HUMAN	ARD1H_HUMAN
1433Z_HUMAN	ARHG2_HUMAN
1433Z_HUMAN	ASPP2_HUMAN
1433Z_HUMAN	ATPA_HUMAN
1433Z_HUMAN	ATPB_HUMAN
1433Z_HUMAN	BAD_HUMAN
1433Z_HUMAN	BCR_HUMAN
1433Z_HUMAN	CALM_HUMAN
1433Z_HUMAN	CH60_HUMAN
1433Z_HUMAN	CLH1_HUMAN
1433Z_HUMAN	DDB1_HUMAN
1433Z_HUMAN	DDX1_HUMAN
1433Z_HUMAN	DESP_HUMAN
1433Z_HUMAN	DFFA_HUMAN
1433Z_HUMAN	DHX9_HUMAN
1433Z_HUMAN	DISC1_HUMAN
1433Z_HUMAN	DNMT1_HUMAN
1433Z_HUMAN	DYHC1_HUMAN
1433Z_HUMAN	ECHM_HUMAN
1433Z_HUMAN	EF1A1_HUMAN
1433Z_HUMAN	EF1B_HUMAN
1433Z_HUMAN	EF2_HUMAN
1433Z_HUMAN	EIF3A_HUMAN
1433Z_HUMAN	EIF3F_HUMAN
1433Z_HUMAN	EZRI_HUMAN
1433Z_HUMAN	FAS_HUMAN
1433Z_HUMAN	FLNA_HUMAN
1433Z_HUMAN	FOXO1_HUMAN
1433Z_HUMAN	FRAP_HUMAN
1433Z_HUMAN	G3P_HUMAN
1433Z_HUMAN	GCNL2_HUMAN
1433Z_HUMAN	GDIA_HUMAN
1433Z_HUMAN	GRP75_HUMAN
1433Z_HUMAN	GRP78_HUMAN
1433Z_HUMAN	H4_HUMAN
1433Z_HUMAN	HDAC4_HUMAN
1433Z_HUMAN	HNRH2_HUMAN
1433Z_HUMAN	HNRPC_HUMAN
1433Z_HUMAN	HNRPF_HUMAN
1433Z_HUMAN	HNRPK_HUMAN
1433Z_HUMAN	HNRPL_HUMAN
1433Z_HUMAN	HNRPU_HUMAN
1433Z_HUMAN	HS90A_HUMAN
1433Z_HUMAN	HS90B_HUMAN
1433Z_HUMAN	HSP71_HUMAN
1433Z_HUMAN	HSP74_HUMAN
1433Z_HUMAN	HSP7C_HUMAN
1433Z_HUMAN	HSPB1_HUMAN
1433Z_HUMAN	IF4A1_HUMAN
1433Z_HUMAN	IF4G1_HUMAN
1433Z_HUMAN	IGF1R_HUMAN
1433Z_HUMAN	IMB1_HUMAN
1433Z_HUMAN	IQGA1_HUMAN
1433Z_HUMAN	IRS1_HUMAN
1433Z_HUMAN	IRS2_HUMAN
1433Z_HUMAN	K1377_HUMAN
1433Z_HUMAN	KAPCA_HUMAN
1433Z_HUMAN	KITH_HUMAN
1433Z_HUMAN	KPCA_HUMAN
1433Z_HUMAN	KPCI_HUMAN
1433Z_HUMAN	KPYM_HUMAN
1433Z_HUMAN	KU70_HUMAN
1433Z_HUMAN	LDHA_HUMAN
1433Z_HUMAN	LDHB_HUMAN
1433Z_HUMAN	LEG1_HUMAN
1433Z_HUMAN	LMNA_HUMAN
1433Z_HUMAN	LMNB1_HUMAN
1433Z_HUMAN	LPPL_HUMAN
1433Z_HUMAN	M3K5_HUMAN
1433Z_HUMAN	MCM3_HUMAN
1433Z_HUMAN	MET_HUMAN
1433Z_HUMAN	MK01_HUMAN
1433Z_HUMAN	MK03_HUMAN
1433Z_HUMAN	MK06_HUMAN
1433Z_HUMAN	MPIP3_HUMAN
1433Z_HUMAN	NAT5_HUMAN
1433Z_HUMAN	NCKP1_HUMAN
1433Z_HUMAN	NDKB_HUMAN
1433Z_HUMAN	NPM_HUMAN
1433Z_HUMAN	NUCL_HUMAN
1433Z_HUMAN	OCTC_HUMAN
1433Z_HUMAN	ODB2_HUMAN
1433Z_HUMAN	P53_HUMAN
1433Z_HUMAN	PA2GA_HUMAN
1433Z_HUMAN	PABP2_HUMAN
1433Z_HUMAN	PAXI_HUMAN
1433Z_HUMAN	PCAF_HUMAN
1433Z_HUMAN	PCBP1_HUMAN
1433Z_HUMAN	PDCD6_HUMAN
1433Z_HUMAN	PDIA1_HUMAN
1433Z_HUMAN	PG12B_HUMAN
1433Z_HUMAN	PGH2_HUMAN
1433Z_HUMAN	PLD1_HUMAN
1433Z_HUMAN	PPIA_HUMAN
1433Z_HUMAN	PRDX1_HUMAN
1433Z_HUMAN	PRI2_HUMAN
1433Z_HUMAN	PSB3_HUMAN
1433Z_HUMAN	PTBP1_HUMAN
1433Z_HUMAN	RBL1_HUMAN
1433Z_HUMAN	RFC4_HUMAN
1433Z_HUMAN	RL10A_HUMAN
1433Z_HUMAN	RL19_HUMAN
1433Z_HUMAN	RL31_HUMAN
1433Z_HUMAN	RL5_HUMAN
1433Z_HUMAN	RL6_HUMAN
1433Z_HUMAN	RL8_HUMAN
1433Z_HUMAN	RLA0_HUMAN
1433Z_HUMAN	RLA1_HUMAN
1433Z_HUMAN	RLA2_HUMAN
1433Z_HUMAN	RNPS1_HUMAN
1433Z_HUMAN	ROA1_HUMAN
1433Z_HUMAN	RS3_HUMAN
1433Z_HUMAN	RS7_HUMAN
1433Z_HUMAN	RUVB1_HUMAN
1433Z_HUMAN	RUVB2_HUMAN
1433Z_HUMAN	SAHH_HUMAN
1433Z_HUMAN	SET_HUMAN
1433Z_HUMAN	SF3B1_HUMAN
1433Z_HUMAN	SF3B3_HUMAN
1433Z_HUMAN	SPTA2_HUMAN
1433Z_HUMAN	SPTB2_HUMAN
1433Z_HUMAN	SRGP1_HUMAN
1433Z_HUMAN	STK25_HUMAN
1433Z_HUMAN	SYEP_HUMAN
1433Z_HUMAN	TBA1A_HUMAN
1433Z_HUMAN	TBB5_HUMAN
1433Z_HUMAN	TBG1_HUMAN
1433Z_HUMAN	TCPA_HUMAN
1433Z_HUMAN	TCPB_HUMAN
1433Z_HUMAN	TCPD_HUMAN
1433Z_HUMAN	TCPG_HUMAN
1433Z_HUMAN	TCPH_HUMAN
1433Z_HUMAN	TCPZ_HUMAN
1433Z_HUMAN	TERA_HUMAN
1433Z_HUMAN	TF2H4_HUMAN
1433Z_HUMAN	TFR1_HUMAN
1433Z_HUMAN	THIO_HUMAN
1433Z_HUMAN	TIF1B_HUMAN
1433Z_HUMAN	TLN1_HUMAN
1433Z_HUMAN	TNPO1_HUMAN
1433Z_HUMAN	TPIS_HUMAN
1433Z_HUMAN	TSC1_HUMAN
1433Z_HUMAN	UBIQ_HUMAN
1433Z_HUMAN	UCP2_HUMAN
1433Z_HUMAN	UCP3_HUMAN
1433Z_HUMAN	VIME_HUMAN
1433Z_HUMAN	VINC_HUMAN
1433Z_HUMAN	WDR6_HUMAN
1433Z_HUMAN	XPO1_HUMAN
1433Z_HUMAN	YBOX1_HUMAN
1B42_HUMAN	6PGD_HUMAN
1B42_HUMAN	AATC_HUMAN
1B42_HUMAN	ACTZ_HUMAN
1B42_HUMAN	AL9A1_HUMAN
1B42_HUMAN	ALDR_HUMAN
1B42_HUMAN	ANXA2_HUMAN
1B42_HUMAN	ARF6_HUMAN
1B42_HUMAN	ARL1_HUMAN
1B42_HUMAN	ARP2_HUMAN
1B42_HUMAN	ARPC2_HUMAN
1B42_HUMAN	ATP5L_HUMAN
1B42_HUMAN	B2MG_HUMAN
1B42_HUMAN	BAF_HUMAN
1B42_HUMAN	CALM_HUMAN
1B42_HUMAN	CAZA1_HUMAN
1B42_HUMAN	CD2A1_HUMAN
1B42_HUMAN	CD3D_HUMAN
1B42_HUMAN	CD3E_HUMAN
1B42_HUMAN	CD3G_HUMAN
1B42_HUMAN	CD3Z_HUMAN
1B42_HUMAN	CD81_HUMAN
1B42_HUMAN	CD8A_HUMAN
1B42_HUMAN	CD8B_HUMAN
1B42_HUMAN	CH10_HUMAN
1B42_HUMAN	CISY_HUMAN
1B42_HUMAN	CRK_HUMAN
1B42_HUMAN	CYC_HUMAN
1B42_HUMAN	DBLOH_HUMAN
1B42_HUMAN	DHSA_HUMAN
1B42_HUMAN	DHX9_HUMAN
1B42_HUMAN	DNJA1_HUMAN
1B42_HUMAN	DYL1_HUMAN
1B42_HUMAN	ECHA_HUMAN
1B42_HUMAN	ECHM_HUMAN
1B42_HUMAN	EF1B_HUMAN
1B42_HUMAN	EF1D_HUMAN
1B42_HUMAN	EFTU_HUMAN
1B42_HUMAN	EIF3F_HUMAN
1B42_HUMAN	EIF3H_HUMAN
1B42_HUMAN	EIF3I_HUMAN
1B42_HUMAN	ESTD_HUMAN
1B42_HUMAN	EXOS4_HUMAN
1B42_HUMAN	EZRI_HUMAN
1B42_HUMAN	FUS_HUMAN
1B42_HUMAN	GDIA_HUMAN
1B42_HUMAN	GLYM_HUMAN
1B42_HUMAN	GUAA_HUMAN
1B42_HUMAN	HNRPM_HUMAN
1B42_HUMAN	HPRT_HUMAN
1B42_HUMAN	IF2G_HUMAN
1B42_HUMAN	K6PL_HUMAN
1B42_HUMAN	LMNB1_HUMAN
1B42_HUMAN	MARE1_HUMAN
1B42_HUMAN	MCM3_HUMAN
1B42_HUMAN	MCM6_HUMAN
1B42_HUMAN	MCM7_HUMAN
1B42_HUMAN	MK01_HUMAN
1B42_HUMAN	MOES_HUMAN
1B42_HUMAN	MP2K1_HUMAN
1B42_HUMAN	MYL6_HUMAN
1B42_HUMAN	NDUS1_HUMAN
1B42_HUMAN	NPM_HUMAN
1B42_HUMAN	NU155_HUMAN
1B42_HUMAN	NUDC_HUMAN
1B42_HUMAN	OST48_HUMAN
1B42_HUMAN	PA2G4_HUMAN
1B42_HUMAN	PABP1_HUMAN
1B42_HUMAN	PCBP1_HUMAN
1B42_HUMAN	PCNA_HUMAN
1B42_HUMAN	PDC6I_HUMAN
1B42_HUMAN	PDCD5_HUMAN
1B42_HUMAN	PNPH_HUMAN
1B42_HUMAN	PP2AB_HUMAN
1B42_HUMAN	PPIB_HUMAN
1B42_HUMAN	PROF2_HUMAN
1B42_HUMAN	PRS10_HUMAN
1B42_HUMAN	PRS4_HUMAN
1B42_HUMAN	PSA1_HUMAN
1B42_HUMAN	PSA6_HUMAN
1B42_HUMAN	PSB1_HUMAN
1B42_HUMAN	PSB3_HUMAN
1B42_HUMAN	PSB4_HUMAN
1B42_HUMAN	PSB6_HUMAN
1B42_HUMAN	PSD13_HUMAN
1B42_HUMAN	PSMD4_HUMAN
1B42_HUMAN	PSMD6_HUMAN
1B42_HUMAN	PSME3_HUMAN
1B42_HUMAN	QCR2_HUMAN
1B42_HUMAN	RAB6A_HUMAN
1B42_HUMAN	RBBP4_HUMAN
1B42_HUMAN	RCC2_HUMAN
1B42_HUMAN	RHOA_HUMAN
1B42_HUMAN	RIR1_HUMAN
1B42_HUMAN	RL23A_HUMAN
1B42_HUMAN	RL24_HUMAN
1B42_HUMAN	RL29_HUMAN
1B42_HUMAN	RL32_HUMAN
1B42_HUMAN	RL37A_HUMAN
1B42_HUMAN	RL38_HUMAN
1B42_HUMAN	RPN1_HUMAN
1B42_HUMAN	RS14_HUMAN
1B42_HUMAN	RS9_HUMAN
1B42_HUMAN	RU2A_HUMAN
1B42_HUMAN	RU2B_HUMAN
1B42_HUMAN	RUVB1_HUMAN
1B42_HUMAN	RUVB2_HUMAN
1B42_HUMAN	SAHH_HUMAN
1B42_HUMAN	SC11A_HUMAN
1B42_HUMAN	SEC13_HUMAN
1B42_HUMAN	SET_HUMAN
1B42_HUMAN	SMC3_HUMAN
1B42_HUMAN	SODM_HUMAN
1B42_HUMAN	SP16H_HUMAN
1B42_HUMAN	SRP14_HUMAN
1B42_HUMAN	SRP68_HUMAN
1B42_HUMAN	SSA27_HUMAN
1B42_HUMAN	SSRA_HUMAN
1B42_HUMAN	TCA_HUMAN
1B42_HUMAN	TCB_HUMAN
1B42_HUMAN	TEBP_HUMAN
1B42_HUMAN	TFR1_HUMAN
1B42_HUMAN	THIL_HUMAN
1B42_HUMAN	TIF1B_HUMAN
1B42_HUMAN	TPM3_HUMAN
1B42_HUMAN	TVA1_HUMAN
1B42_HUMAN	TVA2_HUMAN
1B42_HUMAN	TVA3_HUMAN
1B42_HUMAN	TVB1_HUMAN
1B42_HUMAN	TVB2_HUMAN
1B42_HUMAN	UB2D3_HUMAN
1B42_HUMAN	VDAC1_HUMAN
1C04_HUMAN	ANM1_HUMAN
1C04_HUMAN	B2MG_HUMAN
1C04_HUMAN	C1R_HUMAN
1C04_HUMAN	CALM_HUMAN
1C04_HUMAN	CD3D_HUMAN
1C04_HUMAN	CD3E_HUMAN
1C04_HUMAN	CD3G_HUMAN
1C04_HUMAN	CD3Z_HUMAN
1C04_HUMAN	CD8A_HUMAN
1C04_HUMAN	CD8B_HUMAN
1C04_HUMAN	CLH1_HUMAN
1C04_HUMAN	CO4A_HUMAN
1C04_HUMAN	CPSF5_HUMAN
1C04_HUMAN	CRTC_HUMAN
1C04_HUMAN	EFTU_HUMAN
1C04_HUMAN	GRP78_HUMAN
1C04_HUMAN	GSTM3_HUMAN
1C04_HUMAN	GUAA_HUMAN
1C04_HUMAN	HSP71_HUMAN
1C04_HUMAN	MARE1_HUMAN
1C04_HUMAN	MCM3_HUMAN
1C04_HUMAN	MOES_HUMAN
1C04_HUMAN	NUDC_HUMAN
1C04_HUMAN	PCBP1_HUMAN
1C04_HUMAN	PCNA_HUMAN
1C04_HUMAN	PIN1_HUMAN
1C04_HUMAN	PSA2_HUMAN
1C04_HUMAN	PSA6_HUMAN
1C04_HUMAN	PSB4_HUMAN
1C04_HUMAN	PSMD6_HUMAN
1C04_HUMAN	PSME3_HUMAN
1C04_HUMAN	SFRS6_HUMAN
1C04_HUMAN	TAP1_HUMAN
1C04_HUMAN	TAP2_HUMAN
1C04_HUMAN	TCA_HUMAN
1C04_HUMAN	TCB_HUMAN
1C04_HUMAN	THIL_HUMAN
1C04_HUMAN	TNAP1_HUMAN
1C04_HUMAN	TNFA_HUMAN
1C04_HUMAN	TPSN_HUMAN
1C04_HUMAN	TR10B_HUMAN
1C04_HUMAN	TVA1_HUMAN
1C04_HUMAN	TVA2_HUMAN
1C04_HUMAN	TVA3_HUMAN
1C04_HUMAN	TVB1_HUMAN
1C04_HUMAN	TVB2_HUMAN
2AAA_HUMAN	ACTZ_HUMAN
2AAA_HUMAN	AKAP9_HUMAN
2AAA_HUMAN	ALMS1_HUMAN
2AAA_HUMAN	APC10_HUMAN
2AAA_HUMAN	ARI2_HUMAN
2AAA_HUMAN	AXN1_HUMAN
2AAA_HUMAN	AXN2_HUMAN
2AAA_HUMAN	CDC2_HUMAN
2AAA_HUMAN	CDK4_HUMAN
2AAA_HUMAN	CE152_HUMAN
2AAA_HUMAN	CE164_HUMAN
2AAA_HUMAN	CENPJ_HUMAN
2AAA_HUMAN	CETN2_HUMAN
2AAA_HUMAN	CH60_HUMAN
2AAA_HUMAN	CK5P2_HUMAN
2AAA_HUMAN	CKAP5_HUMAN
2AAA_HUMAN	CLAP1_HUMAN
2AAA_HUMAN	CP135_HUMAN
2AAA_HUMAN	DCTN2_HUMAN
2AAA_HUMAN	DYHC1_HUMAN
2AAA_HUMAN	DYL1_HUMAN
2AAA_HUMAN	EF2_HUMAN
2AAA_HUMAN	FR1OP_HUMAN
2AAA_HUMAN	GCP2_HUMAN
2AAA_HUMAN	HS90A_HUMAN
2AAA_HUMAN	IF4A1_HUMAN
2AAA_HUMAN	KAP3_HUMAN
2AAA_HUMAN	KAPCA_HUMAN
2AAA_HUMAN	KC1D_HUMAN
2AAA_HUMAN	KC1E_HUMAN
2AAA_HUMAN	LIS1_HUMAN
2AAA_HUMAN	MARE1_HUMAN
2AAA_HUMAN	MCM3_HUMAN
2AAA_HUMAN	NDE1_HUMAN
2AAA_HUMAN	NDKB_HUMAN
2AAA_HUMAN	NEK2_HUMAN
2AAA_HUMAN	NFKB2_HUMAN
2AAA_HUMAN	NINL_HUMAN
2AAA_HUMAN	OFD1_HUMAN
2AAA_HUMAN	PCNT_HUMAN
2AAA_HUMAN	PIN1_HUMAN
2AAA_HUMAN	PLK1_HUMAN
2AAA_HUMAN	PLK4_HUMAN
2AAA_HUMAN	PP1A_HUMAN
2AAA_HUMAN	PP1B_HUMAN
2AAA_HUMAN	PP1G_HUMAN
2AAA_HUMAN	PRDX1_HUMAN
2AAA_HUMAN	PTEN_HUMAN
2AAA_HUMAN	RAF1_HUMAN
2AAA_HUMAN	RAP1A_HUMAN
2AAA_HUMAN	RB11A_HUMAN
2AAA_HUMAN	S10A9_HUMAN
2AAA_HUMAN	TBA1A_HUMAN
2AAA_HUMAN	TBA4A_HUMAN
2AAA_HUMAN	TBB2C_HUMAN
2AAA_HUMAN	TBB4_HUMAN
2AAA_HUMAN	TBB5_HUMAN
2AAA_HUMAN	TBG1_HUMAN
2AAA_HUMAN	TBG2_HUMAN
2AAA_HUMAN	TRADD_HUMAN
2ABB_HUMAN	1433E_HUMAN
2ABB_HUMAN	2AAA_HUMAN
2ABB_HUMAN	ACTB_HUMAN
2ABB_HUMAN	ANXA2_HUMAN
2ABB_HUMAN	ATX1_HUMAN
2ABB_HUMAN	AXN1_HUMAN
2ABB_HUMAN	AXN2_HUMAN
2ABB_HUMAN	CALM_HUMAN
2ABB_HUMAN	CAZA1_HUMAN
2ABB_HUMAN	CDC42_HUMAN
2ABB_HUMAN	CH60_HUMAN
2ABB_HUMAN	DDX6_HUMAN
2ABB_HUMAN	DYL1_HUMAN
2ABB_HUMAN	EF1A1_HUMAN
2ABB_HUMAN	EFTU_HUMAN
2ABB_HUMAN	GRP75_HUMAN
2ABB_HUMAN	GRP78_HUMAN
2ABB_HUMAN	HNRH1_HUMAN
2ABB_HUMAN	HNRPF_HUMAN
2ABB_HUMAN	HNRPL_HUMAN
2ABB_HUMAN	HS90A_HUMAN
2ABB_HUMAN	HSP71_HUMAN
2ABB_HUMAN	IMB1_HUMAN
2ABB_HUMAN	IQGA1_HUMAN
2ABB_HUMAN	JUN_HUMAN
2ABB_HUMAN	LYAG_HUMAN
2ABB_HUMAN	MCM5_HUMAN
2ABB_HUMAN	MYL6_HUMAN
2ABB_HUMAN	NCOA3_HUMAN
2ABB_HUMAN	NDKB_HUMAN
2ABB_HUMAN	PP2AA_HUMAN
2ABB_HUMAN	PP2AB_HUMAN
2ABB_HUMAN	PRDX1_HUMAN
2ABB_HUMAN	PYC_HUMAN
2ABB_HUMAN	RAN_HUMAN
2ABB_HUMAN	RL19_HUMAN
2ABB_HUMAN	RL23_HUMAN
2ABB_HUMAN	RL30_HUMAN
2ABB_HUMAN	RL4_HUMAN
2ABB_HUMAN	RL6_HUMAN
2ABB_HUMAN	RLA0_HUMAN
2ABB_HUMAN	RLA1_HUMAN
2ABB_HUMAN	RLA2_HUMAN
2ABB_HUMAN	RS11_HUMAN
2ABB_HUMAN	RS27A_HUMAN
2ABB_HUMAN	RS27_HUMAN
2ABB_HUMAN	RS4X_HUMAN
2ABB_HUMAN	RS6_HUMAN
2ABB_HUMAN	RS8_HUMAN
2ABB_HUMAN	S10A8_HUMAN
2ABB_HUMAN	S10A9_HUMAN
2ABB_HUMAN	TBB2C_HUMAN
2ABB_HUMAN	TBB5_HUMAN
2ABB_HUMAN	TBP_HUMAN
2ABB_HUMAN	TCPA_HUMAN
2ABB_HUMAN	TCPB_HUMAN
2ABB_HUMAN	TCPD_HUMAN
2ABB_HUMAN	TCPE_HUMAN
2ABB_HUMAN	TCPG_HUMAN
2ABB_HUMAN	TCPH_HUMAN
2ABB_HUMAN	TCPZ_HUMAN
2ABB_HUMAN	VIME_HUMAN
2ABB_HUMAN	YBOX1_HUMAN
2DA1_HUMAN	2DA1_HUMAN
2DA1_HUMAN	2DA2_HUMAN
2DA1_HUMAN	2DMA_HUMAN
2DA1_HUMAN	2DMB_HUMAN
2DA1_HUMAN	2DOB_HUMAN
2DA1_HUMAN	2DRA_HUMAN
2DA1_HUMAN	DPA1_HUMAN
2DA1_HUMAN	HB2B_HUMAN
2DA1_HUMAN	HG2A_HUMAN
2DA1_HUMAN	LCK_HUMAN
2DA1_HUMAN	LCP2_HUMAN
2DA1_HUMAN	PDPK1_HUMAN
2DA1_HUMAN	PLCG1_HUMAN
2DA1_HUMAN	PTN11_HUMAN
2DA1_HUMAN	PTN6_HUMAN
2DA1_HUMAN	RIF1_HUMAN
2DA1_HUMAN	TCA_HUMAN
2DA1_HUMAN	TCB_HUMAN
2DA1_HUMAN	TLE1_HUMAN
2DA1_HUMAN	TVA1_HUMAN
2DA1_HUMAN	TVA2_HUMAN
2DA1_HUMAN	TVA3_HUMAN
2DA1_HUMAN	TVB1_HUMAN
2DA1_HUMAN	TVB2_HUMAN
2DA2_HUMAN	2DMA_HUMAN
2DA2_HUMAN	2DMB_HUMAN
2DA2_HUMAN	2DOB_HUMAN
2DA2_HUMAN	2DRA_HUMAN
2DA2_HUMAN	DPA1_HUMAN
2DA2_HUMAN	HB2B_HUMAN
2DA2_HUMAN	LCK_HUMAN
2DA2_HUMAN	LCP2_HUMAN
2DA2_HUMAN	PDPK1_HUMAN
2DA2_HUMAN	PLCG1_HUMAN
2DA2_HUMAN	PTN11_HUMAN
2DA2_HUMAN	PTN6_HUMAN
2DA2_HUMAN	TCA_HUMAN
2DA2_HUMAN	TCB_HUMAN
2DA2_HUMAN	TVA1_HUMAN
2DA2_HUMAN	TVA2_HUMAN
2DA2_HUMAN	TVA3_HUMAN
2DA2_HUMAN	TVB1_HUMAN
2DA2_HUMAN	TVB2_HUMAN
2DMA_HUMAN	C2TA_HUMAN
2DMA_HUMAN	CD82_HUMAN
2DMA_HUMAN	HG2A_HUMAN
2DMA_HUMAN	PSB8_HUMAN
2DMA_HUMAN	SRC_HUMAN
2DMA_HUMAN	TAP1_HUMAN
2DMA_HUMAN	TCA_HUMAN
2DMA_HUMAN	TCB_HUMAN
2DMA_HUMAN	TVA1_HUMAN
2DMA_HUMAN	TVA2_HUMAN
2DMA_HUMAN	TVA3_HUMAN
2DMA_HUMAN	TVB1_HUMAN
2DMA_HUMAN	TVB2_HUMAN
2DMB_HUMAN	2DMA_HUMAN
2DMB_HUMAN	C2TA_HUMAN
2DMB_HUMAN	CD63_HUMAN
2DMB_HUMAN	CD82_HUMAN
2DMB_HUMAN	HG2A_HUMAN
2DMB_HUMAN	PSB8_HUMAN
2DMB_HUMAN	TAP1_HUMAN
2DMB_HUMAN	TCA_HUMAN
2DMB_HUMAN	TCB_HUMAN
2DMB_HUMAN	TVA1_HUMAN
2DMB_HUMAN	TVA2_HUMAN
2DMB_HUMAN	TVA3_HUMAN
2DMB_HUMAN	TVB1_HUMAN
2DMB_HUMAN	TVB2_HUMAN
2DOB_HUMAN	2DMA_HUMAN
2DOB_HUMAN	2DMB_HUMAN
2DOB_HUMAN	C2TA_HUMAN
2DOB_HUMAN	LCK_HUMAN
2DOB_HUMAN	LCP2_HUMAN
2DOB_HUMAN	PDPK1_HUMAN
2DOB_HUMAN	PLCG1_HUMAN
2DOB_HUMAN	PTN11_HUMAN
2DOB_HUMAN	PTN6_HUMAN
2DOB_HUMAN	TCA_HUMAN
2DOB_HUMAN	TCB_HUMAN
2DOB_HUMAN	TVA1_HUMAN
2DOB_HUMAN	TVA2_HUMAN
2DOB_HUMAN	TVA3_HUMAN
2DOB_HUMAN	TVB1_HUMAN
2DOB_HUMAN	TVB2_HUMAN
2DRA_HUMAN	2DMA_HUMAN
2DRA_HUMAN	2DMB_HUMAN
2DRA_HUMAN	2DOB_HUMAN
2DRA_HUMAN	C1QC_HUMAN
2DRA_HUMAN	C2TA_HUMAN
2DRA_HUMAN	CD1D_HUMAN
2DRA_HUMAN	CD63_HUMAN
2DRA_HUMAN	CD82_HUMAN
2DRA_HUMAN	ENPL_HUMAN
2DRA_HUMAN	HG2A_HUMAN
2DRA_HUMAN	JAK1_HUMAN
2DRA_HUMAN	LCK_HUMAN
2DRA_HUMAN	LCP2_HUMAN
2DRA_HUMAN	NONO_HUMAN
2DRA_HUMAN	PDPK1_HUMAN
2DRA_HUMAN	PLCG1_HUMAN
2DRA_HUMAN	PTN11_HUMAN
2DRA_HUMAN	PTN6_HUMAN
2DRA_HUMAN	STAT1_HUMAN
2DRA_HUMAN	TCA_HUMAN
2DRA_HUMAN	TCB_HUMAN
2DRA_HUMAN	TVA1_HUMAN
2DRA_HUMAN	TVA2_HUMAN
2DRA_HUMAN	TVA3_HUMAN
2DRA_HUMAN	TVB1_HUMAN
2DRA_HUMAN	TVB2_HUMAN
3MG_HUMAN	ATPO_HUMAN
3MG_HUMAN	CAZA1_HUMAN
3MG_HUMAN	CH10_HUMAN
3MG_HUMAN	CPSF5_HUMAN
3MG_HUMAN	ETFA_HUMAN
3MG_HUMAN	GSTM3_HUMAN
3MG_HUMAN	HS90A_HUMAN
3MG_HUMAN	LYAG_HUMAN
3MG_HUMAN	MGMT_HUMAN
3MG_HUMAN	PRS7_HUMAN
3MG_HUMAN	PSA1_HUMAN
3MG_HUMAN	PSA2_HUMAN
3MG_HUMAN	PSD7_HUMAN
3MG_HUMAN	RAF1_HUMAN
3MG_HUMAN	RD23A_HUMAN
3MG_HUMAN	RD23B_HUMAN
3MG_HUMAN	RL35A_HUMAN
3MG_HUMAN	RS29_HUMAN
3MG_HUMAN	SET_HUMAN
3MG_HUMAN	SODM_HUMAN
3MG_HUMAN	THIL_HUMAN
41_HUMAN	ACTB_HUMAN
41_HUMAN	ATP5L_HUMAN
41_HUMAN	ATPO_HUMAN
41_HUMAN	CD2A1_HUMAN
41_HUMAN	CENPJ_HUMAN
41_HUMAN	CH10_HUMAN
41_HUMAN	COX5B_HUMAN
41_HUMAN	CYC_HUMAN
41_HUMAN	DHX9_HUMAN
41_HUMAN	DRD2_HUMAN
41_HUMAN	DRD3_HUMAN
41_HUMAN	DYL1_HUMAN
41_HUMAN	ECHA_HUMAN
41_HUMAN	ECHM_HUMAN
41_HUMAN	EF1B_HUMAN
41_HUMAN	EFTU_HUMAN
41_HUMAN	FKB1A_HUMAN
41_HUMAN	HPRT_HUMAN
41_HUMAN	IF34_HUMAN
41_HUMAN	IF4G1_HUMAN
41_HUMAN	IMA2_HUMAN
41_HUMAN	MARE1_HUMAN
41_HUMAN	MERL_HUMAN
41_HUMAN	MOES_HUMAN
41_HUMAN	MYH9_HUMAN
41_HUMAN	NH2L1_HUMAN
41_HUMAN	NU155_HUMAN
41_HUMAN	PCNA_HUMAN
41_HUMAN	PIN1_HUMAN
41_HUMAN	PLEK_HUMAN
41_HUMAN	PNPH_HUMAN
41_HUMAN	PPAC_HUMAN
41_HUMAN	PROF2_HUMAN
41_HUMAN	PRS6B_HUMAN
41_HUMAN	PSA1_HUMAN
41_HUMAN	PSA6_HUMAN
41_HUMAN	PSB1_HUMAN
41_HUMAN	PSB3_HUMAN
41_HUMAN	PSB5_HUMAN
41_HUMAN	PSME3_HUMAN
41_HUMAN	RL8_HUMAN
41_HUMAN	RS3A_HUMAN
41_HUMAN	SPTA2_HUMAN
41_HUMAN	SRP09_HUMAN
41_HUMAN	TPM2_HUMAN
41_HUMAN	U2AF1_HUMAN
41_HUMAN	U520_HUMAN
41_HUMAN	UB2L3_HUMAN
5HT1A_HUMAN	5HT2A_HUMAN
5HT1A_HUMAN	5HT2B_HUMAN
5HT1A_HUMAN	AA1R_HUMAN
5HT1A_HUMAN	AA3R_HUMAN
5HT1A_HUMAN	ACM4_HUMAN
5HT1A_HUMAN	ADCY1_HUMAN
5HT1A_HUMAN	ADCY5_HUMAN
5HT1A_HUMAN	AGTR1_HUMAN
5HT1A_HUMAN	ANGT_HUMAN
5HT1A_HUMAN	ARHG1_HUMAN
5HT1A_HUMAN	BKRB2_HUMAN
5HT1A_HUMAN	C5AR_HUMAN
5HT1A_HUMAN	CCL19_HUMAN
5HT1A_HUMAN	CCL20_HUMAN
5HT1A_HUMAN	CCL21_HUMAN
5HT1A_HUMAN	CCL5_HUMAN
5HT1A_HUMAN	CCR1_HUMAN
5HT1A_HUMAN	CCR2_HUMAN
5HT1A_HUMAN	CCR5_HUMAN
5HT1A_HUMAN	CCR6_HUMAN
5HT1A_HUMAN	CO5_HUMAN
5HT1A_HUMAN	COLI_HUMAN
5HT1A_HUMAN	CXCL2_HUMAN
5HT1A_HUMAN	CXCL6_HUMAN
5HT1A_HUMAN	CXCL9_HUMAN
5HT1A_HUMAN	CXCR3_HUMAN
5HT1A_HUMAN	CXCR4_HUMAN
5HT1A_HUMAN	CXCR6_HUMAN
5HT1A_HUMAN	CXL10_HUMAN
5HT1A_HUMAN	CXL11_HUMAN
5HT1A_HUMAN	GBB1_HUMAN
5HT1A_HUMAN	GBG2_HUMAN
5HT1A_HUMAN	GNA12_HUMAN
5HT1A_HUMAN	GNAI1_HUMAN
5HT1A_HUMAN	GNAI2_HUMAN
5HT1A_HUMAN	GNAI3_HUMAN
5HT1A_HUMAN	GNAO_HUMAN
5HT1A_HUMAN	GNAZ_HUMAN
5HT1A_HUMAN	GROA_HUMAN
5HT1A_HUMAN	IL8_HUMAN
5HT1A_HUMAN	KNG1_HUMAN
5HT1A_HUMAN	NPW_HUMAN
5HT1A_HUMAN	P2Y12_HUMAN
5HT1A_HUMAN	P2Y13_HUMAN
5HT1A_HUMAN	PK3CG_HUMAN
5HT1A_HUMAN	PLCB1_HUMAN
5HT1A_HUMAN	PLCB2_HUMAN
5HT1A_HUMAN	SDF1_HUMAN
5HT1A_HUMAN	SSR1_HUMAN
5HT1A_HUMAN	SSR2_HUMAN
5HT1A_HUMAN	SSR3_HUMAN
5HT1A_HUMAN	SSR5_HUMAN
5HT1B_HUMAN	5HT2A_HUMAN
5HT1B_HUMAN	5HT2B_HUMAN
5HT1B_HUMAN	AA1R_HUMAN
5HT1B_HUMAN	AA3R_HUMAN
5HT1B_HUMAN	ACM4_HUMAN
5HT1B_HUMAN	ADCY1_HUMAN
5HT1B_HUMAN	ADCY5_HUMAN
5HT1B_HUMAN	AGTR1_HUMAN
5HT1B_HUMAN	AKT1_HUMAN
5HT1B_HUMAN	ANGT_HUMAN
5HT1B_HUMAN	AOFA_HUMAN
5HT1B_HUMAN	ARHG1_HUMAN
5HT1B_HUMAN	BKRB2_HUMAN
5HT1B_HUMAN	C5AR_HUMAN
5HT1B_HUMAN	CCL19_HUMAN
5HT1B_HUMAN	CCL20_HUMAN
5HT1B_HUMAN	CCL21_HUMAN
5HT1B_HUMAN	CCL5_HUMAN
5HT1B_HUMAN	CCR1_HUMAN
5HT1B_HUMAN	CCR2_HUMAN
5HT1B_HUMAN	CCR5_HUMAN
5HT1B_HUMAN	CCR6_HUMAN
5HT1B_HUMAN	CO5_HUMAN
5HT1B_HUMAN	COLI_HUMAN
5HT1B_HUMAN	CXCL2_HUMAN
5HT1B_HUMAN	CXCL6_HUMAN
5HT1B_HUMAN	CXCL9_HUMAN
5HT1B_HUMAN	CXCR3_HUMAN
5HT1B_HUMAN	CXCR4_HUMAN
5HT1B_HUMAN	CXCR6_HUMAN
5HT1B_HUMAN	CXL10_HUMAN
5HT1B_HUMAN	CXL11_HUMAN
5HT1B_HUMAN	GBB1_HUMAN
5HT1B_HUMAN	GBG2_HUMAN
5HT1B_HUMAN	GNA12_HUMAN
5HT1B_HUMAN	GNAI1_HUMAN
5HT1B_HUMAN	GNAI2_HUMAN
5HT1B_HUMAN	GNAI3_HUMAN
5HT1B_HUMAN	GNAO_HUMAN
5HT1B_HUMAN	GNAZ_HUMAN
5HT1B_HUMAN	GROA_HUMAN
5HT1B_HUMAN	GSTK1_HUMAN
5HT1B_HUMAN	IL8_HUMAN
5HT1B_HUMAN	KNG1_HUMAN
5HT1B_HUMAN	NPW_HUMAN
5HT1B_HUMAN	P2Y12_HUMAN
5HT1B_HUMAN	P2Y13_HUMAN
5HT1B_HUMAN	PK3CG_HUMAN
5HT1B_HUMAN	PLCB1_HUMAN
5HT1B_HUMAN	PLCB2_HUMAN
5HT1B_HUMAN	SDF1_HUMAN
5HT1B_HUMAN	SSR1_HUMAN
5HT1B_HUMAN	SSR2_HUMAN
5HT1B_HUMAN	SSR3_HUMAN
5HT1B_HUMAN	SSR5_HUMAN
5HT1B_HUMAN	STK6_HUMAN
5HT1D_HUMAN	5HT2A_HUMAN
5HT1D_HUMAN	5HT2B_HUMAN
5HT1D_HUMAN	AA1R_HUMAN
5HT1D_HUMAN	AA3R_HUMAN
5HT1D_HUMAN	ACM4_HUMAN
5HT1D_HUMAN	ADCY1_HUMAN
5HT1D_HUMAN	ADCY5_HUMAN
5HT1D_HUMAN	AGTR1_HUMAN
5HT1D_HUMAN	AKT1_HUMAN
5HT1D_HUMAN	ANGT_HUMAN
5HT1D_HUMAN	ARHG1_HUMAN
5HT1D_HUMAN	BKRB2_HUMAN
5HT1D_HUMAN	C5AR_HUMAN
5HT1D_HUMAN	CCL19_HUMAN
5HT1D_HUMAN	CCL20_HUMAN
5HT1D_HUMAN	CCL21_HUMAN
5HT1D_HUMAN	CCL5_HUMAN
5HT1D_HUMAN	CCR1_HUMAN
5HT1D_HUMAN	CCR2_HUMAN
5HT1D_HUMAN	CCR5_HUMAN
5HT1D_HUMAN	CCR6_HUMAN
5HT1D_HUMAN	CO5_HUMAN
5HT1D_HUMAN	COLI_HUMAN
5HT1D_HUMAN	CXCL2_HUMAN
5HT1D_HUMAN	CXCL6_HUMAN
5HT1D_HUMAN	CXCL9_HUMAN
5HT1D_HUMAN	CXCR3_HUMAN
5HT1D_HUMAN	CXCR4_HUMAN
5HT1D_HUMAN	CXCR6_HUMAN
5HT1D_HUMAN	CXL10_HUMAN
5HT1D_HUMAN	CXL11_HUMAN
5HT1D_HUMAN	GBB1_HUMAN
5HT1D_HUMAN	GBG2_HUMAN
5HT1D_HUMAN	GNA12_HUMAN
5HT1D_HUMAN	GNAI1_HUMAN
5HT1D_HUMAN	GNAI2_HUMAN
5HT1D_HUMAN	GNAI3_HUMAN
5HT1D_HUMAN	GNAO_HUMAN
5HT1D_HUMAN	GNAZ_HUMAN
5HT1D_HUMAN	GROA_HUMAN
5HT1D_HUMAN	IL8_HUMAN
5HT1D_HUMAN	KNG1_HUMAN
5HT1D_HUMAN	NPW_HUMAN
5HT1D_HUMAN	P2Y12_HUMAN
5HT1D_HUMAN	P2Y13_HUMAN
5HT1D_HUMAN	PK3CG_HUMAN
5HT1D_HUMAN	PLCB1_HUMAN
5HT1D_HUMAN	PLCB2_HUMAN
5HT1D_HUMAN	SDF1_HUMAN
5HT1D_HUMAN	SSR1_HUMAN
5HT1D_HUMAN	SSR2_HUMAN
5HT1D_HUMAN	SSR3_HUMAN
5HT1D_HUMAN	SSR5_HUMAN
5HT1E_HUMAN	5HT2A_HUMAN
5HT1E_HUMAN	5HT2B_HUMAN
5HT1E_HUMAN	AA1R_HUMAN
5HT1E_HUMAN	AA3R_HUMAN
5HT1E_HUMAN	ACM4_HUMAN
5HT1E_HUMAN	ADCY1_HUMAN
5HT1E_HUMAN	ADCY5_HUMAN
5HT1E_HUMAN	AGTR1_HUMAN
5HT1E_HUMAN	ANGT_HUMAN
5HT1E_HUMAN	ARHG1_HUMAN
5HT1E_HUMAN	BKRB2_HUMAN
5HT1E_HUMAN	C5AR_HUMAN
5HT1E_HUMAN	CCL19_HUMAN
5HT1E_HUMAN	CCL20_HUMAN
5HT1E_HUMAN	CCL21_HUMAN
5HT1E_HUMAN	CCL5_HUMAN
5HT1E_HUMAN	CCR1_HUMAN
5HT1E_HUMAN	CCR2_HUMAN
5HT1E_HUMAN	CCR5_HUMAN
5HT1E_HUMAN	CCR6_HUMAN
5HT1E_HUMAN	CO5_HUMAN
5HT1E_HUMAN	COLI_HUMAN
5HT1E_HUMAN	CXCL2_HUMAN
5HT1E_HUMAN	CXCL6_HUMAN
5HT1E_HUMAN	CXCL9_HUMAN
5HT1E_HUMAN	CXCR3_HUMAN
5HT1E_HUMAN	CXCR4_HUMAN
5HT1E_HUMAN	CXCR6_HUMAN
5HT1E_HUMAN	CXL10_HUMAN
5HT1E_HUMAN	CXL11_HUMAN
5HT1E_HUMAN	GBB1_HUMAN
5HT1E_HUMAN	GBG2_HUMAN
5HT1E_HUMAN	GNA12_HUMAN
5HT1E_HUMAN	GNAI1_HUMAN
5HT1E_HUMAN	GNAI2_HUMAN
5HT1E_HUMAN	GNAI3_HUMAN
5HT1E_HUMAN	GNAO_HUMAN
5HT1E_HUMAN	GNAZ_HUMAN
5HT1E_HUMAN	GROA_HUMAN
5HT1E_HUMAN	IL8_HUMAN
5HT1E_HUMAN	KNG1_HUMAN
5HT1E_HUMAN	NPW_HUMAN
5HT1E_HUMAN	P2Y12_HUMAN
5HT1E_HUMAN	P2Y13_HUMAN
5HT1E_HUMAN	PK3CG_HUMAN
5HT1E_HUMAN	PLCB1_HUMAN
5HT1E_HUMAN	PLCB2_HUMAN
5HT1E_HUMAN	PRS6A_HUMAN
5HT1E_HUMAN	PRS6B_HUMAN
5HT1E_HUMAN	SDF1_HUMAN
5HT1E_HUMAN	SSR1_HUMAN
5HT1E_HUMAN	SSR2_HUMAN
5HT1E_HUMAN	SSR3_HUMAN
5HT1E_HUMAN	SSR5_HUMAN
5HT1F_HUMAN	5HT2A_HUMAN
5HT1F_HUMAN	5HT2B_HUMAN
5HT1F_HUMAN	AA1R_HUMAN
5HT1F_HUMAN	AA3R_HUMAN
5HT1F_HUMAN	ACM4_HUMAN
5HT1F_HUMAN	ADCY1_HUMAN
5HT1F_HUMAN	ADCY5_HUMAN
5HT1F_HUMAN	AGTR1_HUMAN
5HT1F_HUMAN	ANGT_HUMAN
5HT1F_HUMAN	ARHG1_HUMAN
5HT1F_HUMAN	BKRB2_HUMAN
5HT1F_HUMAN	C5AR_HUMAN
5HT1F_HUMAN	CCL19_HUMAN
5HT1F_HUMAN	CCL20_HUMAN
5HT1F_HUMAN	CCL21_HUMAN
5HT1F_HUMAN	CCL5_HUMAN
5HT1F_HUMAN	CCR1_HUMAN
5HT1F_HUMAN	CCR2_HUMAN
5HT1F_HUMAN	CCR5_HUMAN
5HT1F_HUMAN	CCR6_HUMAN
5HT1F_HUMAN	CO5_HUMAN
5HT1F_HUMAN	COLI_HUMAN
5HT1F_HUMAN	CXCL2_HUMAN
5HT1F_HUMAN	CXCL6_HUMAN
5HT1F_HUMAN	CXCL9_HUMAN
5HT1F_HUMAN	CXCR3_HUMAN
5HT1F_HUMAN	CXCR4_HUMAN
5HT1F_HUMAN	CXCR6_HUMAN
5HT1F_HUMAN	CXL10_HUMAN
5HT1F_HUMAN	CXL11_HUMAN
5HT1F_HUMAN	GBB1_HUMAN
5HT1F_HUMAN	GBG2_HUMAN
5HT1F_HUMAN	GNA12_HUMAN
5HT1F_HUMAN	GNAI1_HUMAN
5HT1F_HUMAN	GNAI2_HUMAN
5HT1F_HUMAN	GNAI3_HUMAN
5HT1F_HUMAN	GNAO_HUMAN
5HT1F_HUMAN	GNAZ_HUMAN
5HT1F_HUMAN	GROA_HUMAN
5HT1F_HUMAN	IL8_HUMAN
5HT1F_HUMAN	KNG1_HUMAN
5HT1F_HUMAN	NPW_HUMAN
5HT1F_HUMAN	P2Y12_HUMAN
5HT1F_HUMAN	P2Y13_HUMAN
5HT1F_HUMAN	PK3CG_HUMAN
5HT1F_HUMAN	PLCB1_HUMAN
5HT1F_HUMAN	PLCB2_HUMAN
5HT1F_HUMAN	SDF1_HUMAN
5HT1F_HUMAN	SSR1_HUMAN
5HT1F_HUMAN	SSR2_HUMAN
5HT1F_HUMAN	SSR3_HUMAN
5HT1F_HUMAN	SSR5_HUMAN
5HT2A_HUMAN	5HT2B_HUMAN
5HT2A_HUMAN	5HT2C_HUMAN
5HT2A_HUMAN	5HT5A_HUMAN
5HT2A_HUMAN	ADA1A_HUMAN
5HT2A_HUMAN	AGTR1_HUMAN
5HT2A_HUMAN	AGTR2_HUMAN
5HT2A_HUMAN	ANGT_HUMAN
5HT2A_HUMAN	AOFA_HUMAN
5HT2A_HUMAN	ARBK1_HUMAN
5HT2A_HUMAN	BKRB1_HUMAN
5HT2A_HUMAN	BKRB2_HUMAN
5HT2A_HUMAN	CASR_HUMAN
5HT2A_HUMAN	COMT_HUMAN
5HT2A_HUMAN	DLG4_HUMAN
5HT2A_HUMAN	DRD2_HUMAN
5HT2A_HUMAN	DRD3_HUMAN
5HT2A_HUMAN	DRD4_HUMAN
5HT2A_HUMAN	GBB1_HUMAN
5HT2A_HUMAN	GBG2_HUMAN
5HT2A_HUMAN	GLHA_HUMAN
5HT2A_HUMAN	GLR_HUMAN
5HT2A_HUMAN	GLUC_HUMAN
5HT2A_HUMAN	GNA14_HUMAN
5HT2A_HUMAN	GNAI1_HUMAN
5HT2A_HUMAN	GNAQ_HUMAN
5HT2A_HUMAN	GRK5_HUMAN
5HT2A_HUMAN	JAK2_HUMAN
5HT2A_HUMAN	KALRN_HUMAN
5HT2A_HUMAN	KNG1_HUMAN
5HT2A_HUMAN	LPAR6_HUMAN
5HT2A_HUMAN	NEU2_HUMAN
5HT2A_HUMAN	P85A_HUMAN
5HT2A_HUMAN	PI3R5_HUMAN
5HT2A_HUMAN	PI3R6_HUMAN
5HT2A_HUMAN	PK3CA_HUMAN
5HT2A_HUMAN	PK3CG_HUMAN
5HT2A_HUMAN	PLCB1_HUMAN
5HT2A_HUMAN	PLCB2_HUMAN
5HT2A_HUMAN	PLCB3_HUMAN
5HT2A_HUMAN	PLCB4_HUMAN
5HT2A_HUMAN	TA2R_HUMAN
5HT2A_HUMAN	TRIO_HUMAN
5HT2A_HUMAN	V1AR_HUMAN
5HT2B_HUMAN	5HT2C_HUMAN
5HT2B_HUMAN	5HT5A_HUMAN
5HT2B_HUMAN	AA2AR_HUMAN
5HT2B_HUMAN	ACADM_HUMAN
5HT2B_HUMAN	ADA1A_HUMAN
5HT2B_HUMAN	ADH1A_HUMAN
5HT2B_HUMAN	AGTR1_HUMAN
5HT2B_HUMAN	AGTR2_HUMAN
5HT2B_HUMAN	AKT3_HUMAN
5HT2B_HUMAN	AL4A1_HUMAN
5HT2B_HUMAN	ANGT_HUMAN
5HT2B_HUMAN	ANMX_HUMAN
5HT2B_HUMAN	ARBK1_HUMAN
5HT2B_HUMAN	ATP5E_HUMAN
5HT2B_HUMAN	B4GT1_HUMAN
5HT2B_HUMAN	B4GT2_HUMAN
5HT2B_HUMAN	BKRB1_HUMAN
5HT2B_HUMAN	BKRB2_HUMAN
5HT2B_HUMAN	CALM_HUMAN
5HT2B_HUMAN	CASR_HUMAN
5HT2B_HUMAN	CCR6_HUMAN
5HT2B_HUMAN	CHIO_HUMAN
5HT2B_HUMAN	CP39A_HUMAN
5HT2B_HUMAN	CP7B1_HUMAN
5HT2B_HUMAN	DGKG_HUMAN
5HT2B_HUMAN	DHRS7_HUMAN
5HT2B_HUMAN	GAK_HUMAN
5HT2B_HUMAN	GBB1_HUMAN
5HT2B_HUMAN	GBG2_HUMAN
5HT2B_HUMAN	GDF1_HUMAN
5HT2B_HUMAN	GLHA_HUMAN
5HT2B_HUMAN	GLR_HUMAN
5HT2B_HUMAN	GLUC_HUMAN
5HT2B_HUMAN	GNA14_HUMAN
5HT2B_HUMAN	GNAQ_HUMAN
5HT2B_HUMAN	GRK5_HUMAN
5HT2B_HUMAN	GSTT2_HUMAN
5HT2B_HUMAN	GUAA_HUMAN
5HT2B_HUMAN	HCDH_HUMAN
5HT2B_HUMAN	HGF_HUMAN
5HT2B_HUMAN	HXK4_HUMAN
5HT2B_HUMAN	KALRN_HUMAN
5HT2B_HUMAN	KC1G3_HUMAN
5HT2B_HUMAN	KIF1B_HUMAN
5HT2B_HUMAN	KNG1_HUMAN
5HT2B_HUMAN	LIPR2_HUMAN
5HT2B_HUMAN	LPAR6_HUMAN
5HT2B_HUMAN	MMP25_HUMAN
5HT2B_HUMAN	N6AM1_HUMAN
5HT2B_HUMAN	NEU2_HUMAN
5HT2B_HUMAN	NUP98_HUMAN
5HT2B_HUMAN	ODB2_HUMAN
5HT2B_HUMAN	P85A_HUMAN
5HT2B_HUMAN	PAK2_HUMAN
5HT2B_HUMAN	PI3R5_HUMAN
5HT2B_HUMAN	PI3R6_HUMAN
5HT2B_HUMAN	PK3CA_HUMAN
5HT2B_HUMAN	PK3CG_HUMAN
5HT2B_HUMAN	PLCB1_HUMAN
5HT2B_HUMAN	PLCB2_HUMAN
5HT2B_HUMAN	PLCB3_HUMAN
5HT2B_HUMAN	PLCB4_HUMAN
5HT2B_HUMAN	PLCD1_HUMAN
5HT2B_HUMAN	PPB1_HUMAN
5HT2B_HUMAN	RAE2_HUMAN
5HT2B_HUMAN	RPIA_HUMAN
5HT2B_HUMAN	SMS_HUMAN
5HT2B_HUMAN	SPF30_HUMAN
5HT2B_HUMAN	SSR1_HUMAN
5HT2B_HUMAN	STIM1_HUMAN
5HT2B_HUMAN	TA2R_HUMAN
5HT2B_HUMAN	THIL_HUMAN
5HT2B_HUMAN	TM50B_HUMAN
5HT2B_HUMAN	TRIO_HUMAN
5HT2B_HUMAN	V1AR_HUMAN
5HT2C_HUMAN	5NTC_HUMAN
5HT2C_HUMAN	ADH1A_HUMAN
5HT2C_HUMAN	ADH1G_HUMAN
5HT2C_HUMAN	AKT3_HUMAN
5HT2C_HUMAN	AL3A2_HUMAN
5HT2C_HUMAN	AL7A1_HUMAN
5HT2C_HUMAN	AOFA_HUMAN
5HT2C_HUMAN	B4GT1_HUMAN
5HT2C_HUMAN	CASP3_HUMAN
5HT2C_HUMAN	CCR6_HUMAN
5HT2C_HUMAN	CDC7_HUMAN
5HT2C_HUMAN	CDK10_HUMAN
5HT2C_HUMAN	CDK9_HUMAN
5HT2C_HUMAN	CDKL1_HUMAN
5HT2C_HUMAN	COLI_HUMAN
5HT2C_HUMAN	CP4FC_HUMAN
5HT2C_HUMAN	CSKP_HUMAN
5HT2C_HUMAN	DEOC_HUMAN
5HT2C_HUMAN	DGKE_HUMAN
5HT2C_HUMAN	DHRS4_HUMAN
5HT2C_HUMAN	DHX35_HUMAN
5HT2C_HUMAN	DLG4_HUMAN
5HT2C_HUMAN	ECHA_HUMAN
5HT2C_HUMAN	ECHM_HUMAN
5HT2C_HUMAN	EHMT1_HUMAN
5HT2C_HUMAN	ENPP1_HUMAN
5HT2C_HUMAN	GAK_HUMAN
5HT2C_HUMAN	GBG2_HUMAN
5HT2C_HUMAN	KALRN_HUMAN
5HT2C_HUMAN	KC1G3_HUMAN
5HT2C_HUMAN	KPCD_HUMAN
5HT2C_HUMAN	LYAM2_HUMAN
5HT2C_HUMAN	MCM4_HUMAN
5HT2C_HUMAN	MPIP1_HUMAN
5HT2C_HUMAN	NSDHL_HUMAN
5HT2C_HUMAN	ODB2_HUMAN
5HT2C_HUMAN	P3C2G_HUMAN
5HT2C_HUMAN	PKD2_HUMAN
5HT2C_HUMAN	PLCD1_HUMAN
5HT2C_HUMAN	PLCG1_HUMAN
5HT2C_HUMAN	PPB1_HUMAN
5HT2C_HUMAN	RLA1_HUMAN
5HT2C_HUMAN	TLR9_HUMAN
5HT2C_HUMAN	TM9S1_HUMAN
5HT2C_HUMAN	TPR_HUMAN
5HT2C_HUMAN	TRIO_HUMAN
5HT2C_HUMAN	UBE2H_HUMAN
5HT2C_HUMAN	ZN268_HUMAN
5HT5A_HUMAN	AA1R_HUMAN
5HT5A_HUMAN	AA3R_HUMAN
5HT5A_HUMAN	ACM4_HUMAN
5HT5A_HUMAN	ADCY1_HUMAN
5HT5A_HUMAN	ADCY5_HUMAN
5HT5A_HUMAN	AGTR1_HUMAN
5HT5A_HUMAN	ANGT_HUMAN
5HT5A_HUMAN	ARHG1_HUMAN
5HT5A_HUMAN	BKRB2_HUMAN
5HT5A_HUMAN	C5AR_HUMAN
5HT5A_HUMAN	CCL19_HUMAN
5HT5A_HUMAN	CCL20_HUMAN
5HT5A_HUMAN	CCL21_HUMAN
5HT5A_HUMAN	CCL5_HUMAN
5HT5A_HUMAN	CCR1_HUMAN
5HT5A_HUMAN	CCR2_HUMAN
5HT5A_HUMAN	CCR5_HUMAN
5HT5A_HUMAN	CCR6_HUMAN
5HT5A_HUMAN	CO5_HUMAN
5HT5A_HUMAN	COLI_HUMAN
5HT5A_HUMAN	CXCL2_HUMAN
5HT5A_HUMAN	CXCL6_HUMAN
5HT5A_HUMAN	CXCL9_HUMAN
5HT5A_HUMAN	CXCR3_HUMAN
5HT5A_HUMAN	CXCR4_HUMAN
5HT5A_HUMAN	CXCR6_HUMAN
5HT5A_HUMAN	CXL10_HUMAN
5HT5A_HUMAN	CXL11_HUMAN
5HT5A_HUMAN	GBB1_HUMAN
5HT5A_HUMAN	GBG2_HUMAN
5HT5A_HUMAN	GNA12_HUMAN
5HT5A_HUMAN	GNAI1_HUMAN
5HT5A_HUMAN	GNAI2_HUMAN
5HT5A_HUMAN	GNAI3_HUMAN
5HT5A_HUMAN	GNAO_HUMAN
5HT5A_HUMAN	GNAZ_HUMAN
5HT5A_HUMAN	GROA_HUMAN
5HT5A_HUMAN	IL8_HUMAN
5HT5A_HUMAN	KNG1_HUMAN
5HT5A_HUMAN	NPW_HUMAN
5HT5A_HUMAN	P2Y12_HUMAN
5HT5A_HUMAN	P2Y13_HUMAN
5HT5A_HUMAN	PK3CG_HUMAN
5HT5A_HUMAN	PLCB1_HUMAN
5HT5A_HUMAN	PLCB2_HUMAN
5HT5A_HUMAN	SDF1_HUMAN
5HT5A_HUMAN	SSR1_HUMAN
5HT5A_HUMAN	SSR2_HUMAN
5HT5A_HUMAN	SSR3_HUMAN
5HT5A_HUMAN	SSR5_HUMAN
5NTC_HUMAN	AAPK2_HUMAN
5NTC_HUMAN	ABCD4_HUMAN
5NTC_HUMAN	ACAD8_HUMAN
5NTC_HUMAN	AL3A2_HUMAN
5NTC_HUMAN	AMPD2_HUMAN
5NTC_HUMAN	ANPRB_HUMAN
5NTC_HUMAN	APT_HUMAN
5NTC_HUMAN	ARFG1_HUMAN
5NTC_HUMAN	ATF1_HUMAN
5NTC_HUMAN	BBS2_HUMAN
5NTC_HUMAN	BET1_HUMAN
5NTC_HUMAN	BGAM_HUMAN
5NTC_HUMAN	CAB39_HUMAN
5NTC_HUMAN	CASP3_HUMAN
5NTC_HUMAN	CCR6_HUMAN
5NTC_HUMAN	CDC7_HUMAN
5NTC_HUMAN	CDK2_HUMAN
5NTC_HUMAN	CHK1_HUMAN
5NTC_HUMAN	CLK2_HUMAN
5NTC_HUMAN	CSKP_HUMAN
5NTC_HUMAN	DCK_HUMAN
5NTC_HUMAN	DGKE_HUMAN
5NTC_HUMAN	DPOE3_HUMAN
5NTC_HUMAN	DPOE4_HUMAN
5NTC_HUMAN	EBPL_HUMAN
5NTC_HUMAN	ENP1_HUMAN
5NTC_HUMAN	ENP3_HUMAN
5NTC_HUMAN	ENPP1_HUMAN
5NTC_HUMAN	ENPP2_HUMAN
5NTC_HUMAN	F13B_HUMAN
5NTC_HUMAN	FAK2_HUMAN
5NTC_HUMAN	FUT7_HUMAN
5NTC_HUMAN	GCDH_HUMAN
5NTC_HUMAN	GMPR1_HUMAN
5NTC_HUMAN	GUAA_HUMAN
5NTC_HUMAN	HCDH_HUMAN
5NTC_HUMAN	HDAC1_HUMAN
5NTC_HUMAN	HPRT_HUMAN
5NTC_HUMAN	HXK1_HUMAN
5NTC_HUMAN	IRAK1_HUMAN
5NTC_HUMAN	ITPA_HUMAN
5NTC_HUMAN	KAD1_HUMAN
5NTC_HUMAN	KC1G3_HUMAN
5NTC_HUMAN	KGUA_HUMAN
5NTC_HUMAN	KPCD_HUMAN
5NTC_HUMAN	KPCE_HUMAN
5NTC_HUMAN	M3K3_HUMAN
5NTC_HUMAN	MBL2_HUMAN
5NTC_HUMAN	MD2L2_HUMAN
5NTC_HUMAN	MP2K4_HUMAN
5NTC_HUMAN	NFYA_HUMAN
5NTC_HUMAN	NLGN2_HUMAN
5NTC_HUMAN	NMNA1_HUMAN
5NTC_HUMAN	OCTC_HUMAN
5NTC_HUMAN	PAPS1_HUMAN
5NTC_HUMAN	PDE1A_HUMAN
5NTC_HUMAN	PDE1B_HUMAN
5NTC_HUMAN	PDE3B_HUMAN
5NTC_HUMAN	PDE4A_HUMAN
5NTC_HUMAN	PDE4B_HUMAN
5NTC_HUMAN	PDE6B_HUMAN
5NTC_HUMAN	PDE6D_HUMAN
5NTC_HUMAN	PDE7B_HUMAN
5NTC_HUMAN	PKN1_HUMAN
5NTC_HUMAN	PNPH_HUMAN
5NTC_HUMAN	PPGB_HUMAN
5NTC_HUMAN	PPP6_HUMAN
5NTC_HUMAN	PRPS1_HUMAN
5NTC_HUMAN	PUR8_HUMAN
5NTC_HUMAN	PUR9_HUMAN
5NTC_HUMAN	RASA2_HUMAN
5NTC_HUMAN	RHOD_HUMAN
5NTC_HUMAN	RPOM_HUMAN
5NTC_HUMAN	SLBP_HUMAN
5NTC_HUMAN	SNP23_HUMAN
5NTC_HUMAN	STK24_HUMAN
5NTC_HUMAN	STK39_HUMAN
5NTC_HUMAN	THAP1_HUMAN
5NTC_HUMAN	THIL_HUMAN
5NTC_HUMAN	TM9S1_HUMAN
5NTC_HUMAN	TOLIP_HUMAN
5NTC_HUMAN	TPSN_HUMAN
5NTC_HUMAN	TTC1_HUMAN
5NTC_HUMAN	UD12_HUMAN
5NTC_HUMAN	ZDHC6_HUMAN
5NTD_HUMAN	ADK_HUMAN
5NTD_HUMAN	AMPD2_HUMAN
5NTD_HUMAN	AOC3_HUMAN
5NTD_HUMAN	CD38_HUMAN
5NTD_HUMAN	CSK2B_HUMAN
5NTD_HUMAN	GMPR1_HUMAN
5NTD_HUMAN	GUAA_HUMAN
5NTD_HUMAN	IPYR_HUMAN
5NTD_HUMAN	ITPA_HUMAN
5NTD_HUMAN	KAD1_HUMAN
5NTD_HUMAN	KGUA_HUMAN
5NTD_HUMAN	NMNA1_HUMAN
5NTD_HUMAN	PDE1A_HUMAN
5NTD_HUMAN	PDE1B_HUMAN
5NTD_HUMAN	PDE3B_HUMAN
5NTD_HUMAN	PDE4A_HUMAN
5NTD_HUMAN	PDE4B_HUMAN
5NTD_HUMAN	PDE6B_HUMAN
5NTD_HUMAN	PDE6D_HUMAN
5NTD_HUMAN	PDE7B_HUMAN
5NTD_HUMAN	PDIA3_HUMAN
5NTD_HUMAN	PRDX5_HUMAN
5NTD_HUMAN	PUR9_HUMAN
6PGD_HUMAN	AATC_HUMAN
6PGD_HUMAN	ACPM_HUMAN
6PGD_HUMAN	ALBU_HUMAN
6PGD_HUMAN	DIAP2_HUMAN
6PGD_HUMAN	ESTD_HUMAN
6PGD_HUMAN	F13B_HUMAN
6PGD_HUMAN	FAS_HUMAN
6PGD_HUMAN	KAD1_HUMAN
6PGD_HUMAN	KIF1B_HUMAN
6PGD_HUMAN	LDHA_HUMAN
6PGD_HUMAN	LDHB_HUMAN
6PGD_HUMAN	MDHC_HUMAN
6PGD_HUMAN	MDHM_HUMAN
6PGD_HUMAN	PGM1_HUMAN
6PGD_HUMAN	PPAC_HUMAN
6PGD_HUMAN	RPIA_HUMAN
6PGD_HUMAN	SAHH_HUMAN
6PGD_HUMAN	TPIS_HUMAN
A2MG_HUMAN	ABR_HUMAN
A2MG_HUMAN	AKP13_HUMAN
A2MG_HUMAN	ALBU_HUMAN
A2MG_HUMAN	APOE_HUMAN
A2MG_HUMAN	ARHG2_HUMAN
A2MG_HUMAN	ARHG3_HUMAN
A2MG_HUMAN	ARHG6_HUMAN
A2MG_HUMAN	ARHG7_HUMAN
A2MG_HUMAN	ARHG8_HUMAN
A2MG_HUMAN	ARHG9_HUMAN
A2MG_HUMAN	ARHGB_HUMAN
A2MG_HUMAN	ARHGC_HUMAN
A2MG_HUMAN	B2MG_HUMAN
A2MG_HUMAN	C1S_HUMAN
A2MG_HUMAN	CATB_HUMAN
A2MG_HUMAN	CDC42_HUMAN
A2MG_HUMAN	ECT2_HUMAN
A2MG_HUMAN	FGD1_HUMAN
A2MG_HUMAN	FGD4_HUMAN
A2MG_HUMAN	GDIA_HUMAN
A2MG_HUMAN	GDIB_HUMAN
A2MG_HUMAN	GDIR1_HUMAN
A2MG_HUMAN	GDIR2_HUMAN
A2MG_HUMAN	GRP78_HUMAN
A2MG_HUMAN	IL10_HUMAN
A2MG_HUMAN	IL1B_HUMAN
A2MG_HUMAN	ITSN1_HUMAN
A2MG_HUMAN	KALRN_HUMAN
A2MG_HUMAN	KNG1_HUMAN
A2MG_HUMAN	LRP1_HUMAN
A2MG_HUMAN	MA32_HUMAN
A2MG_HUMAN	MCF2L_HUMAN
A2MG_HUMAN	MCF2_HUMAN
A2MG_HUMAN	MIRO1_HUMAN
A2MG_HUMAN	MIRO2_HUMAN
A2MG_HUMAN	NGF_HUMAN
A2MG_HUMAN	PSN1_HUMAN
A2MG_HUMAN	RAC1_HUMAN
A2MG_HUMAN	RAC2_HUMAN
A2MG_HUMAN	RAC3_HUMAN
A2MG_HUMAN	RGRF1_HUMAN
A2MG_HUMAN	RGRF2_HUMAN
A2MG_HUMAN	RHBT1_HUMAN
A2MG_HUMAN	RHBT2_HUMAN
A2MG_HUMAN	RHG04_HUMAN
A2MG_HUMAN	RHOA_HUMAN
A2MG_HUMAN	RHOB_HUMAN
A2MG_HUMAN	RHOC_HUMAN
A2MG_HUMAN	RHOD_HUMAN
A2MG_HUMAN	RHOF_HUMAN
A2MG_HUMAN	RHOG_HUMAN
A2MG_HUMAN	RHOH_HUMAN
A2MG_HUMAN	RHOJ_HUMAN
A2MG_HUMAN	RHOQ_HUMAN
A2MG_HUMAN	RHOU_HUMAN
A2MG_HUMAN	RHOV_HUMAN
A2MG_HUMAN	SOS1_HUMAN
A2MG_HUMAN	SOS2_HUMAN
A2MG_HUMAN	THRB_HUMAN
A2MG_HUMAN	TIAM1_HUMAN
A2MG_HUMAN	TRIO_HUMAN
A2MG_HUMAN	VAV2_HUMAN
A2MG_HUMAN	VAV3_HUMAN
A2MG_HUMAN	VAV_HUMAN
A4_HUMAN	1433Z_HUMAN
A4_HUMAN	A2MG_HUMAN
A4_HUMAN	ACTB_HUMAN
A4_HUMAN	APBP2_HUMAN
A4_HUMAN	APOE_HUMAN
A4_HUMAN	CAN1_HUMAN
A4_HUMAN	CASP8_HUMAN
A4_HUMAN	CBP_HUMAN
A4_HUMAN	CO4A1_HUMAN
A4_HUMAN	CO4A2_HUMAN
A4_HUMAN	CRTC_HUMAN
A4_HUMAN	CRYAB_HUMAN
A4_HUMAN	ECHB_HUMAN
A4_HUMAN	EP300_HUMAN
A4_HUMAN	G3P_HUMAN
A4_HUMAN	GELS_HUMAN
A4_HUMAN	GNAZ_HUMAN
A4_HUMAN	GRB2_HUMAN
A4_HUMAN	GSK3B_HUMAN
A4_HUMAN	HS90A_HUMAN
A4_HUMAN	HSP7C_HUMAN
A4_HUMAN	KNG1_HUMAN
A4_HUMAN	LRP1_HUMAN
A4_HUMAN	M3K5_HUMAN
A4_HUMAN	MSH6_HUMAN
A4_HUMAN	MYH9_HUMAN
A4_HUMAN	NSF_HUMAN
A4_HUMAN	PGBM_HUMAN
A4_HUMAN	PIN1_HUMAN
A4_HUMAN	PPIA_HUMAN
A4_HUMAN	SMAD3_HUMAN
A4_HUMAN	SMAD4_HUMAN
A4_HUMAN	SPTA2_HUMAN
A4_HUMAN	TBB5_HUMAN
A4_HUMAN	THRB_HUMAN
A4_HUMAN	TNR16_HUMAN
AA1R_HUMAN	AA2AR_HUMAN
AA1R_HUMAN	AA3R_HUMAN
AA1R_HUMAN	ACM2_HUMAN
AA1R_HUMAN	ACM4_HUMAN
AA1R_HUMAN	ADA2C_HUMAN
AA1R_HUMAN	ADCY1_HUMAN
AA1R_HUMAN	ADCY2_HUMAN
AA1R_HUMAN	ADCY3_HUMAN
AA1R_HUMAN	ADCY4_HUMAN
AA1R_HUMAN	ADCY5_HUMAN
AA1R_HUMAN	ADCY6_HUMAN
AA1R_HUMAN	ADCY7_HUMAN
AA1R_HUMAN	ADCY8_HUMAN
AA1R_HUMAN	ADCY9_HUMAN
AA1R_HUMAN	ADCYA_HUMAN
AA1R_HUMAN	AGTR1_HUMAN
AA1R_HUMAN	AGTR2_HUMAN
AA1R_HUMAN	ANGT_HUMAN
AA1R_HUMAN	APEL_HUMAN
AA1R_HUMAN	APJ_HUMAN
AA1R_HUMAN	ARHG1_HUMAN
AA1R_HUMAN	ARHGC_HUMAN
AA1R_HUMAN	BKRB1_HUMAN
AA1R_HUMAN	BKRB2_HUMAN
AA1R_HUMAN	C5AR_HUMAN
AA1R_HUMAN	CASR_HUMAN
AA1R_HUMAN	CCL16_HUMAN
AA1R_HUMAN	CCL19_HUMAN
AA1R_HUMAN	CCL20_HUMAN
AA1R_HUMAN	CCL21_HUMAN
AA1R_HUMAN	CCL25_HUMAN
AA1R_HUMAN	CCL27_HUMAN
AA1R_HUMAN	CCL28_HUMAN
AA1R_HUMAN	CCL5_HUMAN
AA1R_HUMAN	CCR10_HUMAN
AA1R_HUMAN	CCR1_HUMAN
AA1R_HUMAN	CCR2_HUMAN
AA1R_HUMAN	CCR3_HUMAN
AA1R_HUMAN	CCR4_HUMAN
AA1R_HUMAN	CCR5_HUMAN
AA1R_HUMAN	CCR6_HUMAN
AA1R_HUMAN	CCR7_HUMAN
AA1R_HUMAN	CCR8_HUMAN
AA1R_HUMAN	CCR9_HUMAN
AA1R_HUMAN	CNR1_HUMAN
AA1R_HUMAN	CNR2_HUMAN
AA1R_HUMAN	CO5_HUMAN
AA1R_HUMAN	COLI_HUMAN
AA1R_HUMAN	CXCL2_HUMAN
AA1R_HUMAN	CXCL3_HUMAN
AA1R_HUMAN	CXCL5_HUMAN
AA1R_HUMAN	CXCL6_HUMAN
AA1R_HUMAN	CXCL7_HUMAN
AA1R_HUMAN	CXCL9_HUMAN
AA1R_HUMAN	CXCR1_HUMAN
AA1R_HUMAN	CXCR2_HUMAN
AA1R_HUMAN	CXCR3_HUMAN
AA1R_HUMAN	CXCR4_HUMAN
AA1R_HUMAN	CXCR6_HUMAN
AA1R_HUMAN	CXCR7_HUMAN
AA1R_HUMAN	CXL10_HUMAN
AA1R_HUMAN	CXL11_HUMAN
AA1R_HUMAN	CXL16_HUMAN
AA1R_HUMAN	DRD2_HUMAN
AA1R_HUMAN	DRD3_HUMAN
AA1R_HUMAN	DRD4_HUMAN
AA1R_HUMAN	GBB1_HUMAN
AA1R_HUMAN	GBG2_HUMAN
AA1R_HUMAN	GNA12_HUMAN
AA1R_HUMAN	GNA13_HUMAN
AA1R_HUMAN	GNAI1_HUMAN
AA1R_HUMAN	GNAI2_HUMAN
AA1R_HUMAN	GNAI3_HUMAN
AA1R_HUMAN	GNAO_HUMAN
AA1R_HUMAN	GNAT1_HUMAN
AA1R_HUMAN	GNAT2_HUMAN
AA1R_HUMAN	GNAT3_HUMAN
AA1R_HUMAN	GNAZ_HUMAN
AA1R_HUMAN	GPER_HUMAN
AA1R_HUMAN	GPR55_HUMAN
AA1R_HUMAN	GROA_HUMAN
AA1R_HUMAN	HRH3_HUMAN
AA1R_HUMAN	HRH4_HUMAN
AA1R_HUMAN	IL8_HUMAN
AA1R_HUMAN	KNG1_HUMAN
AA1R_HUMAN	NPBW1_HUMAN
AA1R_HUMAN	NPBW2_HUMAN
AA1R_HUMAN	NPB_HUMAN
AA1R_HUMAN	NPW_HUMAN
AA1R_HUMAN	OPRD_HUMAN
AA1R_HUMAN	OPRK_HUMAN
AA1R_HUMAN	OPRM_HUMAN
AA1R_HUMAN	OPRX_HUMAN
AA1R_HUMAN	P2RY4_HUMAN
AA1R_HUMAN	P2Y12_HUMAN
AA1R_HUMAN	P2Y13_HUMAN
AA1R_HUMAN	P2Y14_HUMAN
AA1R_HUMAN	PDYN_HUMAN
AA1R_HUMAN	PENK_HUMAN
AA1R_HUMAN	PI3R5_HUMAN
AA1R_HUMAN	PI3R6_HUMAN
AA1R_HUMAN	PK3CG_HUMAN
AA1R_HUMAN	PLCB1_HUMAN
AA1R_HUMAN	PLCB2_HUMAN
AA1R_HUMAN	PLCB3_HUMAN
AA1R_HUMAN	PLF4_HUMAN
AA1R_HUMAN	PNOC_HUMAN
AA1R_HUMAN	SDF1_HUMAN
AA1R_HUMAN	SMS_HUMAN
AA1R_HUMAN	SSR1_HUMAN
AA1R_HUMAN	SSR2_HUMAN
AA1R_HUMAN	SSR3_HUMAN
AA1R_HUMAN	SSR4_HUMAN
AA1R_HUMAN	SSR5_HUMAN
AA2AR_HUMAN	AA3R_HUMAN
AA2AR_HUMAN	ACTN1_HUMAN
AA2AR_HUMAN	ACTN4_HUMAN
AA2AR_HUMAN	ADCY1_HUMAN
AA2AR_HUMAN	ADCY2_HUMAN
AA2AR_HUMAN	ADCY3_HUMAN
AA2AR_HUMAN	ADCY4_HUMAN
AA2AR_HUMAN	ADCY5_HUMAN
AA2AR_HUMAN	ADCY6_HUMAN
AA2AR_HUMAN	ADCY7_HUMAN
AA2AR_HUMAN	ADCY8_HUMAN
AA2AR_HUMAN	ADCY9_HUMAN
AA2AR_HUMAN	ADCYA_HUMAN
AA2AR_HUMAN	ADH1A_HUMAN
AA2AR_HUMAN	ADML_HUMAN
AA2AR_HUMAN	ADRB1_HUMAN
AA2AR_HUMAN	ADRB2_HUMAN
AA2AR_HUMAN	ARD1H_HUMAN
AA2AR_HUMAN	ARPC2_HUMAN
AA2AR_HUMAN	B4GT4_HUMAN
AA2AR_HUMAN	BET1_HUMAN
AA2AR_HUMAN	CALCR_HUMAN
AA2AR_HUMAN	CDK10_HUMAN
AA2AR_HUMAN	CRFR1_HUMAN
AA2AR_HUMAN	CRFR2_HUMAN
AA2AR_HUMAN	CRF_HUMAN
AA2AR_HUMAN	DGKE_HUMAN
AA2AR_HUMAN	DPOD4_HUMAN
AA2AR_HUMAN	DRD2_HUMAN
AA2AR_HUMAN	ECHA_HUMAN
AA2AR_HUMAN	FMR1_HUMAN
AA2AR_HUMAN	FRM4B_HUMAN
AA2AR_HUMAN	GBB1_HUMAN
AA2AR_HUMAN	GBG2_HUMAN
AA2AR_HUMAN	GDAP1_HUMAN
AA2AR_HUMAN	GLHA_HUMAN
AA2AR_HUMAN	GLP1R_HUMAN
AA2AR_HUMAN	GLR_HUMAN
AA2AR_HUMAN	GLUC_HUMAN
AA2AR_HUMAN	GNAS2_HUMAN
AA2AR_HUMAN	HCDH_HUMAN
AA2AR_HUMAN	HD_HUMAN
AA2AR_HUMAN	HXK4_HUMAN
AA2AR_HUMAN	KPCD3_HUMAN
AA2AR_HUMAN	LYAG_HUMAN
AA2AR_HUMAN	M3K3_HUMAN
AA2AR_HUMAN	M3K5_HUMAN
AA2AR_HUMAN	MERL_HUMAN
AA2AR_HUMAN	MP2K4_HUMAN
AA2AR_HUMAN	NEU2_HUMAN
AA2AR_HUMAN	NTRK1_HUMAN
AA2AR_HUMAN	NUP98_HUMAN
AA2AR_HUMAN	PI3R5_HUMAN
AA2AR_HUMAN	PI3R6_HUMAN
AA2AR_HUMAN	PK3CG_HUMAN
AA2AR_HUMAN	PLCB1_HUMAN
AA2AR_HUMAN	PLCB2_HUMAN
AA2AR_HUMAN	PLCB3_HUMAN
AA2AR_HUMAN	PTHY_HUMAN
AA2AR_HUMAN	RAMP1_HUMAN
AA2AR_HUMAN	RAMP3_HUMAN
AA2AR_HUMAN	RPIA_HUMAN
AA2AR_HUMAN	RT28_HUMAN
AA2AR_HUMAN	TTC1_HUMAN
AA2AR_HUMAN	VIPR1_HUMAN
AA3R_HUMAN	ABCD3_HUMAN
AA3R_HUMAN	ACM2_HUMAN
AA3R_HUMAN	ACM4_HUMAN
AA3R_HUMAN	ADA2C_HUMAN
AA3R_HUMAN	ADCY1_HUMAN
AA3R_HUMAN	ADCY2_HUMAN
AA3R_HUMAN	ADCY3_HUMAN
AA3R_HUMAN	ADCY4_HUMAN
AA3R_HUMAN	ADCY5_HUMAN
AA3R_HUMAN	ADCY6_HUMAN
AA3R_HUMAN	ADCY7_HUMAN
AA3R_HUMAN	ADCY8_HUMAN
AA3R_HUMAN	ADCY9_HUMAN
AA3R_HUMAN	ADCYA_HUMAN
AA3R_HUMAN	AGTR1_HUMAN
AA3R_HUMAN	AGTR2_HUMAN
AA3R_HUMAN	ANGT_HUMAN
AA3R_HUMAN	APEL_HUMAN
AA3R_HUMAN	APJ_HUMAN
AA3R_HUMAN	ARHG1_HUMAN
AA3R_HUMAN	ARHGC_HUMAN
AA3R_HUMAN	BKRB1_HUMAN
AA3R_HUMAN	BKRB2_HUMAN
AA3R_HUMAN	C5AR_HUMAN
AA3R_HUMAN	CASR_HUMAN
AA3R_HUMAN	CCL16_HUMAN
AA3R_HUMAN	CCL19_HUMAN
AA3R_HUMAN	CCL20_HUMAN
AA3R_HUMAN	CCL21_HUMAN
AA3R_HUMAN	CCL25_HUMAN
AA3R_HUMAN	CCL27_HUMAN
AA3R_HUMAN	CCL28_HUMAN
AA3R_HUMAN	CCL5_HUMAN
AA3R_HUMAN	CCR10_HUMAN
AA3R_HUMAN	CCR1_HUMAN
AA3R_HUMAN	CCR2_HUMAN
AA3R_HUMAN	CCR3_HUMAN
AA3R_HUMAN	CCR4_HUMAN
AA3R_HUMAN	CCR5_HUMAN
AA3R_HUMAN	CCR6_HUMAN
AA3R_HUMAN	CCR7_HUMAN
AA3R_HUMAN	CCR8_HUMAN
AA3R_HUMAN	CCR9_HUMAN
AA3R_HUMAN	CNR1_HUMAN
AA3R_HUMAN	CNR2_HUMAN
AA3R_HUMAN	CO5_HUMAN
AA3R_HUMAN	COLI_HUMAN
AA3R_HUMAN	CXCL2_HUMAN
AA3R_HUMAN	CXCL3_HUMAN
AA3R_HUMAN	CXCL5_HUMAN
AA3R_HUMAN	CXCL6_HUMAN
AA3R_HUMAN	CXCL7_HUMAN
AA3R_HUMAN	CXCL9_HUMAN
AA3R_HUMAN	CXCR1_HUMAN
AA3R_HUMAN	CXCR2_HUMAN
AA3R_HUMAN	CXCR3_HUMAN
AA3R_HUMAN	CXCR4_HUMAN
AA3R_HUMAN	CXCR6_HUMAN
AA3R_HUMAN	CXCR7_HUMAN
AA3R_HUMAN	CXL10_HUMAN
AA3R_HUMAN	CXL11_HUMAN
AA3R_HUMAN	CXL16_HUMAN
AA3R_HUMAN	DRD2_HUMAN
AA3R_HUMAN	DRD3_HUMAN
AA3R_HUMAN	DRD4_HUMAN
AA3R_HUMAN	EAA2_HUMAN
AA3R_HUMAN	FCERG_HUMAN
AA3R_HUMAN	GBB1_HUMAN
AA3R_HUMAN	GBG2_HUMAN
AA3R_HUMAN	GBP2_HUMAN
AA3R_HUMAN	GNA12_HUMAN
AA3R_HUMAN	GNA13_HUMAN
AA3R_HUMAN	GNAI1_HUMAN
AA3R_HUMAN	GNAI2_HUMAN
AA3R_HUMAN	GNAI3_HUMAN
AA3R_HUMAN	GNAO_HUMAN
AA3R_HUMAN	GNAT1_HUMAN
AA3R_HUMAN	GNAT2_HUMAN
AA3R_HUMAN	GNAT3_HUMAN
AA3R_HUMAN	GNAZ_HUMAN
AA3R_HUMAN	GPER_HUMAN
AA3R_HUMAN	GPR55_HUMAN
AA3R_HUMAN	GROA_HUMAN
AA3R_HUMAN	GSH0_HUMAN
AA3R_HUMAN	HRH3_HUMAN
AA3R_HUMAN	HRH4_HUMAN
AA3R_HUMAN	IL8_HUMAN
AA3R_HUMAN	KNG1_HUMAN
AA3R_HUMAN	NPBW1_HUMAN
AA3R_HUMAN	NPBW2_HUMAN
AA3R_HUMAN	NPB_HUMAN
AA3R_HUMAN	NPW_HUMAN
AA3R_HUMAN	OPRD_HUMAN
AA3R_HUMAN	OPRK_HUMAN
AA3R_HUMAN	OPRM_HUMAN
AA3R_HUMAN	OPRX_HUMAN
AA3R_HUMAN	P2RY4_HUMAN
AA3R_HUMAN	P2Y12_HUMAN
AA3R_HUMAN	P2Y13_HUMAN
AA3R_HUMAN	P2Y14_HUMAN
AA3R_HUMAN	PDYN_HUMAN
AA3R_HUMAN	PENK_HUMAN
AA3R_HUMAN	PI3R5_HUMAN
AA3R_HUMAN	PI3R6_HUMAN
AA3R_HUMAN	PK3CG_HUMAN
AA3R_HUMAN	PLCB1_HUMAN
AA3R_HUMAN	PLCB2_HUMAN
AA3R_HUMAN	PLCB3_HUMAN
AA3R_HUMAN	PLF4_HUMAN
AA3R_HUMAN	PNOC_HUMAN
AA3R_HUMAN	SDF1_HUMAN
AA3R_HUMAN	SMS_HUMAN
AA3R_HUMAN	SSR1_HUMAN
AA3R_HUMAN	SSR2_HUMAN
AA3R_HUMAN	SSR3_HUMAN
AA3R_HUMAN	SSR4_HUMAN
AA3R_HUMAN	SSR5_HUMAN
AA3R_HUMAN	SSRB_HUMAN
AA3R_HUMAN	TCPG_HUMAN
AAKB1_HUMAN	6PGD_HUMAN
AAKB1_HUMAN	ACADV_HUMAN
AAKB1_HUMAN	ADH6_HUMAN
AAKB1_HUMAN	ALDOA_HUMAN
AAKB1_HUMAN	ATPK_HUMAN
AAKB1_HUMAN	ATPO_HUMAN
AAKB1_HUMAN	CAZA1_HUMAN
AAKB1_HUMAN	CDC37_HUMAN
AAKB1_HUMAN	CFTR_HUMAN
AAKB1_HUMAN	CHIN_HUMAN
AAKB1_HUMAN	CHK1_HUMAN
AAKB1_HUMAN	CLH1_HUMAN
AAKB1_HUMAN	CYC_HUMAN
AAKB1_HUMAN	DDB1_HUMAN
AAKB1_HUMAN	ECHA_HUMAN
AAKB1_HUMAN	ECHM_HUMAN
AAKB1_HUMAN	EF1D_HUMAN
AAKB1_HUMAN	EIF3E_HUMAN
AAKB1_HUMAN	EIF3H_HUMAN
AAKB1_HUMAN	ENPP1_HUMAN
AAKB1_HUMAN	ETFA_HUMAN
AAKB1_HUMAN	EZRI_HUMAN
AAKB1_HUMAN	GDIB_HUMAN
AAKB1_HUMAN	GLYM_HUMAN
AAKB1_HUMAN	GRB2_HUMAN
[truncated: 59,144 more rows]

## Sheet: Features of candidate markers
HCC-related-proteins	Degree	nBetweenness	Closeness	Coreness
1433B_HUMAN	184	0.136756	45.4585	34
1433E_HUMAN	151	0.123101	43.6057	36
1433G_HUMAN	355	0.519099	46.9443	40
1433Z_HUMAN	428	1.22586	49.6802	41
1B42_HUMAN	273	0.868837	47.1342	41
2AAA_HUMAN	163	0.144456	43.3982	36
5HT2B_HUMAN	137	0.136597	41.4755	41
5NTC_HUMAN	164	0.182057	42.9537	35
AA3R_HUMAN	144	0.12066	39.9809	51
AAPK1_HUMAN	178	0.109961	45.776	41
ACADV_HUMAN	199	0.15726	45.9868	41
ACTB_HUMAN	158	0.306537	46.2914	40
ADCY1_HUMAN	286	0.546119	42.8484	51
ADCY5_HUMAN	270	0.45985	42.7175	51
ADH1A_HUMAN	260	0.244813	46.0272	41
ADH1G_HUMAN	235	0.26559	45.9768	40
ADH6_HUMAN	107	0.0593742	41.1903	37
ADRB2_HUMAN	114	0.0871939	40.8056	34
ADT2_HUMAN	91	0.15672	44.5696	36
AGTR1_HUMAN	151	0.0458793	39.6259	51
AKAP1_HUMAN	162	0.126336	44.6741	40
AKT1_HUMAN	242	0.399226	47.5079	40
AKT2_HUMAN	101	0.0740577	43.3623	34
AKT3_HUMAN	174	0.145845	45.6564	41
AL3A2_HUMAN	254	0.256905	45.9164	41
AL7A1_HUMAN	182	0.13104	42.6566	40
ANGT_HUMAN	188	0.114496	41.3854	51
ARF6_HUMAN	159	0.182173	45.5969	36
ARHG1_HUMAN	181	0.20962	40.6238	51
ARHG7_HUMAN	146	0.114805	42.6653	41
ARSA_HUMAN	90	0.0462171	43.9899	36
AT5F1_HUMAN	132	0.253085	41.1903	43
ATP7A_HUMAN	122	0.0320076	42.7175	40
ATPA_HUMAN	116	0.284822	41.5577	43
ATPD_HUMAN	231	0.699628	45.0968	43
ATPK_HUMAN	112	0.210938	40.941	43
AURKB_HUMAN	130	0.138895	41.3446	47
B4GT1_HUMAN	221	0.19559	45.194	41
BIG1_HUMAN	106	0.0707911	42.3465	37
BIRC5_HUMAN	117	0.139974	40.6317	47
BKRB2_HUMAN	173	0.0490386	39.92	51
BUB1B_HUMAN	115	0.0771423	40.3114	47
BUB1_HUMAN	149	0.313856	43.7148	47
BUB3_HUMAN	131	0.1346	41.6485	47
C5AR_HUMAN	159	0.191041	40.7026	51
CALM_HUMAN	226	0.335373	45.194	33
CASP3_HUMAN	198	0.317041	46.8603	33
CCL20_HUMAN	160	0.140564	41.0292	51
CCL21_HUMAN	158	0.100316	39.6483	51
CCL5_HUMAN	181	0.267218	42.6393	51
CCNH_HUMAN	219	0.311783	43.7604	36
CCR1_HUMAN	158	0.0401324	39.499	51
CCR2_HUMAN	154	0.0613113	40.0038	51
CCR5_HUMAN	255	0.557475	44.1195	51
CCR6_HUMAN	248	0.670872	45.8461	51
CDC20_HUMAN	148	0.132436	41.2146	47
CDC2_HUMAN	231	0.409468	45.5276	36
CDC42_HUMAN	212	0.252549	43.8519	41
CDC7_HUMAN	267	0.564656	48.6204	41
CDK10_HUMAN	171	0.206604	46.4452	41
CDK2_HUMAN	386	1.21139	50.5423	41
CDK7_HUMAN	172	0.138735	42.2442	33
CDK9_HUMAN	287	0.715688	49.2369	41
CDKL1_HUMAN	153	0.0896747	45.4683	41
CENPA_HUMAN	103	0.0995233	40.1109	47
CENPF_HUMAN	105	0.140136	40.8613	47
CENPR_HUMAN	116	0.138906	41.2146	47
CHIN_HUMAN	119	0.143378	42.5096	41
CHK1_HUMAN	269	0.466394	48.1958	41
CLK2_HUMAN	157	0.116154	45.029	41
CO6_HUMAN	128	0.141996	44.4186	40
COLI_HUMAN	195	0.247476	41.533	51
COPA_HUMAN	137	0.110461	42.8659	37
COX5A_HUMAN	100	0.114818	40.1493	36
CP39A_HUMAN	162	0.114327	42.1677	39
CP7B1_HUMAN	234	0.261797	46.2098	41
CPSF2_HUMAN	126	0.0626275	39.5064	55
CRCM_HUMAN	240	0.41454	48.0633	34
CSKP_HUMAN	255	0.378289	46.7038	41
CXCR4_HUMAN	130	0.0643291	39.5287	51
CYC_HUMAN	177	0.464271	41.9652	43
DGKE_HUMAN	109	0.108609	42.0156	36
DHX35_HUMAN	196	0.186942	47.3791	41
DHX9_HUMAN	167	0.220785	43.953	55
DLG4_HUMAN	170	0.141356	43.3354	34
DYHC1_HUMAN	86	0.0457267	40.7184	36
DYL1_HUMAN	152	0.15692	43.3444	36
ECHA_HUMAN	350	1.27256	49.3644	43
ECHB_HUMAN	143	0.274941	43.6966	43
ECHM_HUMAN	208	0.26664	47.3791	41
ECHP_HUMAN	194	0.0668286	42.1847	41
ECT2_HUMAN	107	0.0332421	39.4025	41
EF1A1_HUMAN	245	0.570399	47.2404	81
EF1D_HUMAN	122	0.066467	41.6319	81
EF1G_HUMAN	207	0.160356	43.9346	81
EF2_HUMAN	136	0.102595	43.907	81
EGFR_HUMAN	307	0.599329	49.5979	36
EHMT1_HUMAN	112	0.0455827	41.2633	35
EI2BA_HUMAN	103	0.0885765	39.5437	58
EIF3E_HUMAN	140	0.0784505	41.1096	81
EIF3H_HUMAN	143	0.0429305	40.1109	81
EIF3I_HUMAN	128	0.0515724	41.5659	81
ELOB_HUMAN	84	0.0577003	40.7501	32
ENPP1_HUMAN	221	0.298562	46.5173	41
ERBB2_HUMAN	201	0.175994	44.9421	34
ERCC2_HUMAN	156	0.123622	41.3121	32
FRM4B_HUMAN	107	0.0358584	41.9904	40
FUS_HUMAN	151	0.120378	41.4345	55
FYN_HUMAN	345	0.495664	46.8394	34
GAK_HUMAN	259	0.336003	47.6808	41
GBB1_HUMAN	634	0.39752	43.9807	51
GBG2_HUMAN	260	0.11586	41.1257	51
GDIB_HUMAN	122	0.139455	40.8215	41
GNA12_HUMAN	180	0.196772	40.3657	51
GNAI1_HUMAN	185	0.185196	42.0578	51
GNAI2_HUMAN	169	0.185363	41.3039	51
GNAI3_HUMAN	153	0.0833315	40.157	51
GNAZ_HUMAN	146	0.154511	40.7422	51
GRB2_HUMAN	740	3.40134	53.3588	55
GROA_HUMAN	155	0.0686574	39.5139	51
GRP78_HUMAN	154	0.161441	45.0968	32
GTF2I_HUMAN	140	0.154089	45.9868	40
HCD2_HUMAN	179	0.157376	44.6265	41
HCDH_HUMAN	322	0.956638	48.1958	43
HD_HUMAN	160	0.204464	43.8795	34
HNRH1_HUMAN	170	0.206287	44.0454	55
HNRPC_HUMAN	150	0.108289	42.2356	55
HNRPD_HUMAN	140	0.0607677	40.5531	55
HNRPF_HUMAN	140	0.107894	42.3465	55
HNRPG_HUMAN	163	0.0899037	40.9011	55
HNRPK_HUMAN	195	0.36288	45.9566	55
HNRPL_HUMAN	156	0.18402	42.622	55
HNRPM_HUMAN	155	0.169391	42.1084	55
HNRPR_HUMAN	139	0.0942566	41.665	55
HNRPU_HUMAN	189	0.328499	45.058	55
HS90A_HUMAN	265	0.650143	48.643	36
HS90B_HUMAN	132	0.173537	46.9653	34
HSP7C_HUMAN	202	0.321053	47.5402	33
HXK4_HUMAN	261	0.222916	46.5276	41
IF1AY_HUMAN	120	0.0352822	40.1263	79
IF2A_HUMAN	161	0.105044	42.2356	81
IF2P_HUMAN	135	0.0561381	41.3283	81
IF4A1_HUMAN	198	0.150009	43.9807	81
IF4A2_HUMAN	219	0.147127	42.0831	81
IF4B_HUMAN	177	0.0536252	41.3854	81
IF4E_HUMAN	213	0.178513	43.5967	81
IF4G1_HUMAN	207	0.212632	43.9438	81
IF4G2_HUMAN	115	0.148538	43.3802	39
IF5_HUMAN	140	0.0580472	40.9891	81
IKBA_HUMAN	155	0.221202	45.7261	32
IKKA_HUMAN	161	0.215949	47.422	34
IKKB_HUMAN	146	0.136927	46.1589	33
IKKE_HUMAN	391	1.28383	49.5979	45
IL8_HUMAN	229	0.522649	43.4521	51
IMPA1_HUMAN	127	0.0623507	42.3979	40
INS_HUMAN	139	0.205717	42.4065	81
IRAK1_HUMAN	260	0.499497	49.0641	41
JPH4_HUMAN	158	0.0864581	45.4585	41
KC1G3_HUMAN	229	0.171812	46.6104	41
KNG1_HUMAN	194	0.169016	40.6159	51
KPCA_HUMAN	135	0.131275	44.3434	32
KPCD2_HUMAN	153	0.123109	45	41
KPCD_HUMAN	251	0.390427	48.396	41
KPYM_HUMAN	277	0.682028	48.7448	41
LIS1_HUMAN	201	0.386573	43.2193	47
LSM2_HUMAN	206	0.15408	40.8613	55
LYAG_HUMAN	99	0.0516824	41.665	36
M3K1_HUMAN	194	0.374864	48.0743	41
MARE1_HUMAN	157	0.214321	42.2101	47
MAT1_HUMAN	198	0.260761	44.7408	34
MBL2_HUMAN	140	0.600103	44.1102	35
MD2L1_HUMAN	149	0.20155	42.622	47
MK01_HUMAN	190	0.24647	46.9023	32
MK03_HUMAN	214	0.410816	46.9232	34
MP2K1_HUMAN	205	0.384867	47.8658	40
MPIP1_HUMAN	323	1.1786	50.5667	41
MYC_HUMAN	376	1.43807	49.2369	40
NCBP1_HUMAN	164	0.142534	42.2527	55
NDKB_HUMAN	145	0.205428	43.3264	35
NEK2_HUMAN	109	0.0454841	41.1661	36
NFKB1_HUMAN	231	0.302658	46.9023	33
NFYA_HUMAN	107	0.0779338	42.0409	32
NH2L1_HUMAN	116	0.0498885	39.581	55
NSDHL_HUMAN	302	0.361063	48.2846	41
NUCL_HUMAN	114	0.130347	43.7422	36
NUDC_HUMAN	97	0.125328	40.7184	47
NUP43_HUMAN	259	1.26281	48.2291	47
OCTC_HUMAN	235	0.163882	45.8661	41
ODB2_HUMAN	303	0.324064	47.422	41
P2Y12_HUMAN	140	0.0626137	39.6483	51
P3C2G_HUMAN	137	0.116767	45.6366	41
P53_HUMAN	413	1.27596	49.9405	34
P85A_HUMAN	322	0.581359	47.3363	41
P85B_HUMAN	124	0.114872	41.7979	41
PABP1_HUMAN	129	0.104443	43.1393	55
PAK1_HUMAN	123	0.118285	43.5695	33
PAK2_HUMAN	206	0.414543	48.5642	41
PAPOA_HUMAN	168	0.214613	42.2442	55
PAXI_HUMAN	232	0.489537	47.1872	40
PCBP1_HUMAN	169	0.196819	43.0154	55
PESC_HUMAN	130	0.0658599	40.0267	41
PINX1_HUMAN	97	0.0711153	40.9171	33
PK3CA_HUMAN	206	0.454996	45.8461	41
PK3CB_HUMAN	83	0.0603651	42.5182	32
PK3CG_HUMAN	233	0.227979	42.0915	51
PKD2_HUMAN	181	0.0929361	44.9421	41
PLCB1_HUMAN	309	0.288255	42.4236	51
PLCB2_HUMAN	412	1.18214	48.0633	51
PLCD1_HUMAN	281	0.272733	47.4972	41
PLCG1_HUMAN	414	1.27633	50.4693	41
PLCG2_HUMAN	163	0.122926	42.7872	36
PLK1_HUMAN	271	0.533004	44.5886	47
PP1G_HUMAN	114	0.126513	40.8613	47
PPB1_HUMAN	152	0.142363	44.1381	40
PRKDC_HUMAN	117	0.144511	45.577	34
PRP4_HUMAN	147	0.0838509	39.4173	55
PTBP1_HUMAN	159	0.104181	41.4919	55
RAC1_HUMAN	307	0.513709	46.1386	41
RAE2_HUMAN	161	0.0663183	42.9449	41
RAF1_HUMAN	189	0.235264	46.6415	34
RASH_HUMAN	225	0.345054	46.4658	35
RCC2_HUMAN	89	0.137975	40.9171	47
REN3B_HUMAN	120	0.0480819	39.7159	55
RHG04_HUMAN	171	0.161471	41.6733	41
RHOA_HUMAN	267	0.456526	45.5276	41
RHOC_HUMAN	152	0.0992101	41.0292	41
RHOD_HUMAN	235	0.460025	44.8077	41
RL10A_HUMAN	174	0.0540688	42.0156	81
RL12_HUMAN	186	0.160377	43.5695	81
RL19_HUMAN	186	0.157046	44.0731	81
RL22_HUMAN	168	0.082816	42.8221	81
RL23A_HUMAN	184	0.123122	43.9254	81
RL23_HUMAN	187	0.177328	44.9421	81
RL26_HUMAN	165	0.049422	42.6566	81
RL27_HUMAN	180	0.120678	43.2728	81
RL29_HUMAN	167	0.0747174	41.8062	81
RL30_HUMAN	194	0.119022	43.8336	81
RL35A_HUMAN	174	0.12822	43.9623	81
RL35_HUMAN	211	0.228867	43.6057	81
RL36_HUMAN	172	0.0557486	42.6566	81
RL37A_HUMAN	161	0.0413775	41.3202	81
RL37_HUMAN	169	0.0791674	42.0409	81
RL38_HUMAN	166	0.0927606	42.5787	81
RL3_HUMAN	191	0.122176	44.2032	81
RL40_HUMAN	150	0.0761917	41.6899	81
RL4_HUMAN	202	0.161012	43.8336	81
RL5_HUMAN	177	0.107212	42.8571	81
RL6_HUMAN	187	0.183693	43.5062	81
RL7_HUMAN	192	0.104522	43.1215	81
RL8_HUMAN	186	0.0932435	42.57	81
RLA0_HUMAN	188	0.0851461	42.9098	81
RLA1_HUMAN	283	0.728786	47.0813	81
RLA2_HUMAN	176	0.0883274	43.3623	81
ROA1_HUMAN	145	0.118942	42.5441	55
ROA2_HUMAN	135	0.0910434	41.0613	55
RPAB4_HUMAN	194	0.0718087	40.1033	55
RPB11_HUMAN	187	0.102116	41.41	55
RPB3_HUMAN	248	0.603157	44.6265	55
RPN1_HUMAN	123	0.0495061	40.8374	81
RPN2_HUMAN	121	0.0572232	40.6317	81
RS10_HUMAN	180	0.112791	42.596	81
RS11_HUMAN	191	0.12421	43.6693	81
RS13_HUMAN	189	0.150659	44.4091	81
RS16_HUMAN	207	0.267972	45.796	81
RS17_HUMAN	163	0.0330189	41.2958	81
RS18_HUMAN	186	0.0865391	43.246	81
RS19_HUMAN	170	0.126937	43.6148	81
RS20_HUMAN	188	0.085896	43.2907	81
RS24_HUMAN	170	0.0305786	41.6071	81
RS26_HUMAN	160	0.0654025	42.0493	81
RS27A_HUMAN	153	0.0628	41.4591	81
RS27_HUMAN	256	0.91054	45.2818	81
RS2_HUMAN	192	0.117996	43.1393	81
RS3_HUMAN	218	0.149389	44.3434	81
RS4Y1_HUMAN	178	0.0430019	41.158	81
RS5_HUMAN	174	0.0881116	43.0242	81
RS6_HUMAN	195	0.123934	43.4701	81
RS7_HUMAN	182	0.106089	43.3623	81
RS8_HUMAN	181	0.091796	43.246	81
RS9_HUMAN	225	0.299092	45.7461	81
RSMB_HUMAN	161	0.0789711	39.9276	55
RSSA_HUMAN	172	0.088553	41.7313	81
RT28_HUMAN	159	0.0910725	44.6265	41
RU2A_HUMAN	133	0.0728874	41.2065	55
RU2B_HUMAN	135	0.0965923	41.533	55
RUXF_HUMAN	144	0.0695928	40.1186	55
SDF1_HUMAN	168	0.105196	40.1493	51
SEC13_HUMAN	113	0.0837326	40.1647	47
SF3A1_HUMAN	160	0.189348	42.761	55
SF3A2_HUMAN	176	0.0745814	40.2804	55
SF3B1_HUMAN	205	0.360567	45.2135	55
SF3B4_HUMAN	147	0.0798371	40.8056	55
SFRS1_HUMAN	165	0.139409	41.6733	55
SFRS5_HUMAN	139	0.0428613	39.4321	55
SLBP_HUMAN	171	0.3144	46.6	41
SMC3_HUMAN	107	0.0790849	43.4611	34
SMD2_HUMAN	171	0.178559	42.8396	55
SNRPA_HUMAN	141	0.0505787	40.0114	55
SOS1_HUMAN	182	0.154498	42.3038	41
SRC_HUMAN	334	0.621806	48.9839	36
SSR1_HUMAN	176	0.224163	41.4591	51
SSR2_HUMAN	136	0.0402074	39.4321	51
SSR3_HUMAN	156	0.163499	41.1499	51
SSR5_HUMAN	153	0.351954	41.5494	51
SSRB_HUMAN	131	0.125282	40.1186	81
SSRD_HUMAN	130	0.0922127	41.7064	81
STAT3_HUMAN	242	0.653847	46.8708	40
STK39_HUMAN	198	0.112311	46.3835	41
TBA1A_HUMAN	119	0.0676288	41.5083	36
TBA4A_HUMAN	118	0.100993	42.7697	36
TBB2C_HUMAN	105	0.0347368	39.9429	36
TBB4_HUMAN	233	0.433633	46.363	37
TBB5_HUMAN	112	0.0915703	43.2817	36
TBG1_HUMAN	93	0.0316886	40.2032	36
TBP_HUMAN	175	0.141602	41.9149	32
TERT_HUMAN	89	0.0836023	44.0454	32
TF2B_HUMAN	110	0.0500392	40.3502	32
TF2H4_HUMAN	115	0.037354	39.7611	32
TF65_HUMAN	227	0.36752	48.1074	33
THIL_HUMAN	184	0.196465	45.0097	41
TLR9_HUMAN	135	0.160161	45.5177	38
TM50B_HUMAN	105	0.0312657	42.6306	40
TM9S1_HUMAN	128	0.0508398	42.8047	40
TTK_HUMAN	83	0.0476815	42.3551	36
U2AF2_HUMAN	171	0.0884743	40.0573	55
U5S1_HUMAN	138	0.0753606	41.0211	55
UBIQ_HUMAN	442	2.14468	51.5487	81
UCP5_HUMAN	130	0.0864881	43.4701	41
UDB17_HUMAN	216	0.124795	45.7461	41
XPO1_HUMAN	139	0.273839	43.6511	47
YBOX1_HUMAN	161	0.229969	43.3175	55

## Sheet: PPI network for candidate marke
NodeA	NodeB
1433B_HUMAN	1433G_HUMAN
1433B_HUMAN	1433Z_HUMAN
1433B_HUMAN	AKT1_HUMAN
1433B_HUMAN	ATPA_HUMAN
1433B_HUMAN	EGFR_HUMAN
1433B_HUMAN	GRB2_HUMAN
1433B_HUMAN	GRP78_HUMAN
1433B_HUMAN	HS90A_HUMAN
1433B_HUMAN	HS90B_HUMAN
1433B_HUMAN	MK01_HUMAN
1433B_HUMAN	MK03_HUMAN
1433B_HUMAN	P85B_HUMAN
1433B_HUMAN	PRKDC_HUMAN
1433B_HUMAN	RASH_HUMAN
1433B_HUMAN	SOS1_HUMAN
1433B_HUMAN	SRC_HUMAN
1433B_HUMAN	TBA1A_HUMAN
1433B_HUMAN	TBB5_HUMAN
1433B_HUMAN	U5S1_HUMAN
1433B_HUMAN	UBIQ_HUMAN
1433E_HUMAN	1433G_HUMAN
1433E_HUMAN	2AAA_HUMAN
1433E_HUMAN	CALM_HUMAN
1433E_HUMAN	CDC2_HUMAN
1433E_HUMAN	DYHC1_HUMAN
1433E_HUMAN	DYL1_HUMAN
1433E_HUMAN	HS90A_HUMAN
1433E_HUMAN	LIS1_HUMAN
1433E_HUMAN	MARE1_HUMAN
1433E_HUMAN	NEK2_HUMAN
1433E_HUMAN	PLK1_HUMAN
1433E_HUMAN	RAF1_HUMAN
1433E_HUMAN	SRC_HUMAN
1433E_HUMAN	TBA1A_HUMAN
1433E_HUMAN	TBA4A_HUMAN
1433E_HUMAN	TBB2C_HUMAN
1433E_HUMAN	TBB4_HUMAN
1433E_HUMAN	TBB5_HUMAN
1433E_HUMAN	TBG1_HUMAN
1433E_HUMAN	TBP_HUMAN
1433G_HUMAN	1433Z_HUMAN
1433G_HUMAN	2AAA_HUMAN
1433G_HUMAN	ARHG7_HUMAN
1433G_HUMAN	ATPA_HUMAN
1433G_HUMAN	CALM_HUMAN
1433G_HUMAN	CDC2_HUMAN
1433G_HUMAN	CLK2_HUMAN
1433G_HUMAN	DYHC1_HUMAN
1433G_HUMAN	DYL1_HUMAN
1433G_HUMAN	EF1G_HUMAN
1433G_HUMAN	HNRH1_HUMAN
1433G_HUMAN	HS90A_HUMAN
1433G_HUMAN	KPCA_HUMAN
1433G_HUMAN	KPCD_HUMAN
1433G_HUMAN	LIS1_HUMAN
1433G_HUMAN	MARE1_HUMAN
1433G_HUMAN	NCBP1_HUMAN
1433G_HUMAN	NEK2_HUMAN
1433G_HUMAN	P85A_HUMAN
1433G_HUMAN	PABP1_HUMAN
1433G_HUMAN	PLK1_HUMAN
1433G_HUMAN	PRKDC_HUMAN
1433G_HUMAN	RAF1_HUMAN
1433G_HUMAN	RL3_HUMAN
1433G_HUMAN	SF3B1_HUMAN
1433G_HUMAN	SFRS1_HUMAN
1433G_HUMAN	SRC_HUMAN
1433G_HUMAN	TBA1A_HUMAN
1433G_HUMAN	TBA4A_HUMAN
1433G_HUMAN	TBB2C_HUMAN
1433G_HUMAN	TBB4_HUMAN
1433G_HUMAN	TBB5_HUMAN
1433G_HUMAN	TBG1_HUMAN
1433G_HUMAN	U5S1_HUMAN
1433G_HUMAN	UBIQ_HUMAN
1433Z_HUMAN	1433E_HUMAN
1433Z_HUMAN	ACTB_HUMAN
1433Z_HUMAN	AKT1_HUMAN
1433Z_HUMAN	ATPA_HUMAN
1433Z_HUMAN	CALM_HUMAN
1433Z_HUMAN	DHX9_HUMAN
1433Z_HUMAN	DYHC1_HUMAN
1433Z_HUMAN	ECHM_HUMAN
1433Z_HUMAN	EF1A1_HUMAN
1433Z_HUMAN	EF2_HUMAN
1433Z_HUMAN	GRP78_HUMAN
1433Z_HUMAN	HNRPC_HUMAN
1433Z_HUMAN	HNRPF_HUMAN
1433Z_HUMAN	HNRPK_HUMAN
1433Z_HUMAN	HNRPL_HUMAN
1433Z_HUMAN	HNRPU_HUMAN
1433Z_HUMAN	HS90A_HUMAN
1433Z_HUMAN	HS90B_HUMAN
1433Z_HUMAN	HSP7C_HUMAN
1433Z_HUMAN	IF4A1_HUMAN
1433Z_HUMAN	IF4G1_HUMAN
1433Z_HUMAN	KPCA_HUMAN
1433Z_HUMAN	KPYM_HUMAN
1433Z_HUMAN	MK01_HUMAN
1433Z_HUMAN	MK03_HUMAN
1433Z_HUMAN	NDKB_HUMAN
1433Z_HUMAN	NUCL_HUMAN
1433Z_HUMAN	OCTC_HUMAN
1433Z_HUMAN	ODB2_HUMAN
1433Z_HUMAN	P53_HUMAN
1433Z_HUMAN	PAXI_HUMAN
1433Z_HUMAN	PCBP1_HUMAN
1433Z_HUMAN	PTBP1_HUMAN
1433Z_HUMAN	RL10A_HUMAN
1433Z_HUMAN	RL19_HUMAN
1433Z_HUMAN	RL5_HUMAN
1433Z_HUMAN	RL6_HUMAN
1433Z_HUMAN	RL8_HUMAN
1433Z_HUMAN	RLA0_HUMAN
1433Z_HUMAN	RLA1_HUMAN
1433Z_HUMAN	RLA2_HUMAN
1433Z_HUMAN	ROA1_HUMAN
1433Z_HUMAN	RS3_HUMAN
1433Z_HUMAN	RS7_HUMAN
1433Z_HUMAN	SF3B1_HUMAN
1433Z_HUMAN	TBA1A_HUMAN
1433Z_HUMAN	TBB5_HUMAN
1433Z_HUMAN	TBG1_HUMAN
1433Z_HUMAN	TF2H4_HUMAN
1433Z_HUMAN	UBIQ_HUMAN
1433Z_HUMAN	XPO1_HUMAN
1433Z_HUMAN	YBOX1_HUMAN
1B42_HUMAN	ARF6_HUMAN
1B42_HUMAN	CALM_HUMAN
1B42_HUMAN	CYC_HUMAN
1B42_HUMAN	DHX9_HUMAN
1B42_HUMAN	DYL1_HUMAN
1B42_HUMAN	ECHA_HUMAN
1B42_HUMAN	ECHM_HUMAN
1B42_HUMAN	EF1D_HUMAN
1B42_HUMAN	EIF3H_HUMAN
1B42_HUMAN	EIF3I_HUMAN
1B42_HUMAN	FUS_HUMAN
1B42_HUMAN	HNRPM_HUMAN
1B42_HUMAN	MARE1_HUMAN
1B42_HUMAN	MK01_HUMAN
1B42_HUMAN	MP2K1_HUMAN
1B42_HUMAN	NUDC_HUMAN
1B42_HUMAN	PABP1_HUMAN
1B42_HUMAN	PCBP1_HUMAN
1B42_HUMAN	RCC2_HUMAN
1B42_HUMAN	RHOA_HUMAN
1B42_HUMAN	RL23A_HUMAN
1B42_HUMAN	RL29_HUMAN
1B42_HUMAN	RL37A_HUMAN
1B42_HUMAN	RL38_HUMAN
1B42_HUMAN	RPN1_HUMAN
1B42_HUMAN	RS9_HUMAN
1B42_HUMAN	RU2A_HUMAN
1B42_HUMAN	RU2B_HUMAN
1B42_HUMAN	SEC13_HUMAN
1B42_HUMAN	SMC3_HUMAN
1B42_HUMAN	THIL_HUMAN
2AAA_HUMAN	CDC2_HUMAN
2AAA_HUMAN	DYHC1_HUMAN
2AAA_HUMAN	DYL1_HUMAN
2AAA_HUMAN	EF2_HUMAN
2AAA_HUMAN	HS90A_HUMAN
2AAA_HUMAN	IF4A1_HUMAN
2AAA_HUMAN	LIS1_HUMAN
2AAA_HUMAN	MARE1_HUMAN
2AAA_HUMAN	NDKB_HUMAN
2AAA_HUMAN	NEK2_HUMAN
2AAA_HUMAN	PLK1_HUMAN
2AAA_HUMAN	PP1G_HUMAN
2AAA_HUMAN	RAF1_HUMAN
2AAA_HUMAN	TBA1A_HUMAN
2AAA_HUMAN	TBA4A_HUMAN
2AAA_HUMAN	TBB2C_HUMAN
2AAA_HUMAN	TBB4_HUMAN
2AAA_HUMAN	TBB5_HUMAN
2AAA_HUMAN	TBG1_HUMAN
5HT2B_HUMAN	ADH1A_HUMAN
5HT2B_HUMAN	AGTR1_HUMAN
5HT2B_HUMAN	AKT3_HUMAN
5HT2B_HUMAN	ANGT_HUMAN
5HT2B_HUMAN	B4GT1_HUMAN
5HT2B_HUMAN	BKRB2_HUMAN
5HT2B_HUMAN	CALM_HUMAN
5HT2B_HUMAN	CCR6_HUMAN
5HT2B_HUMAN	CP39A_HUMAN
5HT2B_HUMAN	CP7B1_HUMAN
5HT2B_HUMAN	GAK_HUMAN
5HT2B_HUMAN	GBB1_HUMAN
5HT2B_HUMAN	GBG2_HUMAN
5HT2B_HUMAN	HCDH_HUMAN
5HT2B_HUMAN	HXK4_HUMAN
5HT2B_HUMAN	KC1G3_HUMAN
5HT2B_HUMAN	KNG1_HUMAN
5HT2B_HUMAN	ODB2_HUMAN
5HT2B_HUMAN	P85A_HUMAN
5HT2B_HUMAN	PAK2_HUMAN
5HT2B_HUMAN	PK3CA_HUMAN
5HT2B_HUMAN	PK3CG_HUMAN
5HT2B_HUMAN	PLCB1_HUMAN
5HT2B_HUMAN	PLCB2_HUMAN
5HT2B_HUMAN	PLCD1_HUMAN
5HT2B_HUMAN	PPB1_HUMAN
5HT2B_HUMAN	RAE2_HUMAN
5HT2B_HUMAN	SSR1_HUMAN
5HT2B_HUMAN	THIL_HUMAN
5HT2B_HUMAN	TM50B_HUMAN
5NTC_HUMAN	AL3A2_HUMAN
5NTC_HUMAN	CASP3_HUMAN
5NTC_HUMAN	CCR6_HUMAN
5NTC_HUMAN	CDC7_HUMAN
5NTC_HUMAN	CDK2_HUMAN
5NTC_HUMAN	CHK1_HUMAN
5NTC_HUMAN	CLK2_HUMAN
5NTC_HUMAN	CSKP_HUMAN
5NTC_HUMAN	DGKE_HUMAN
5NTC_HUMAN	ENPP1_HUMAN
5NTC_HUMAN	HCDH_HUMAN
5NTC_HUMAN	IRAK1_HUMAN
5NTC_HUMAN	KC1G3_HUMAN
5NTC_HUMAN	KPCD_HUMAN
5NTC_HUMAN	MBL2_HUMAN
5NTC_HUMAN	NFYA_HUMAN
5NTC_HUMAN	OCTC_HUMAN
5NTC_HUMAN	RHOD_HUMAN
5NTC_HUMAN	SLBP_HUMAN
5NTC_HUMAN	STK39_HUMAN
5NTC_HUMAN	THIL_HUMAN
5NTC_HUMAN	TM9S1_HUMAN
AA3R_HUMAN	ADCY1_HUMAN
AA3R_HUMAN	ADCY5_HUMAN
AA3R_HUMAN	AGTR1_HUMAN
AA3R_HUMAN	ANGT_HUMAN
AA3R_HUMAN	ARHG1_HUMAN
AA3R_HUMAN	BKRB2_HUMAN
AA3R_HUMAN	C5AR_HUMAN
AA3R_HUMAN	CCL20_HUMAN
AA3R_HUMAN	CCL21_HUMAN
AA3R_HUMAN	CCL5_HUMAN
AA3R_HUMAN	CCR1_HUMAN
AA3R_HUMAN	CCR2_HUMAN
AA3R_HUMAN	CCR5_HUMAN
AA3R_HUMAN	CCR6_HUMAN
AA3R_HUMAN	COLI_HUMAN
AA3R_HUMAN	CXCR4_HUMAN
AA3R_HUMAN	GBB1_HUMAN
AA3R_HUMAN	GBG2_HUMAN
AA3R_HUMAN	GNA12_HUMAN
AA3R_HUMAN	GNAI1_HUMAN
AA3R_HUMAN	GNAI2_HUMAN
AA3R_HUMAN	GNAI3_HUMAN
AA3R_HUMAN	GNAZ_HUMAN
AA3R_HUMAN	GROA_HUMAN
AA3R_HUMAN	IL8_HUMAN
AA3R_HUMAN	KNG1_HUMAN
AA3R_HUMAN	P2Y12_HUMAN
AA3R_HUMAN	PK3CG_HUMAN
AA3R_HUMAN	PLCB1_HUMAN
AA3R_HUMAN	PLCB2_HUMAN
AA3R_HUMAN	SDF1_HUMAN
AA3R_HUMAN	SSR1_HUMAN
AA3R_HUMAN	SSR2_HUMAN
AA3R_HUMAN	SSR3_HUMAN
AA3R_HUMAN	SSR5_HUMAN
AA3R_HUMAN	SSRB_HUMAN
AAPK1_HUMAN	ACADV_HUMAN
AAPK1_HUMAN	ADH6_HUMAN
AAPK1_HUMAN	ADT2_HUMAN
AAPK1_HUMAN	AKT2_HUMAN
AAPK1_HUMAN	ATP7A_HUMAN
AAPK1_HUMAN	B4GT1_HUMAN
AAPK1_HUMAN	CDC7_HUMAN
AAPK1_HUMAN	CDK2_HUMAN
AAPK1_HUMAN	CDK9_HUMAN
AAPK1_HUMAN	CDKL1_HUMAN
AAPK1_HUMAN	CHK1_HUMAN
AAPK1_HUMAN	CO6_HUMAN
AAPK1_HUMAN	CSKP_HUMAN
AAPK1_HUMAN	DHX35_HUMAN
AAPK1_HUMAN	ECHA_HUMAN
AAPK1_HUMAN	ECHP_HUMAN
AAPK1_HUMAN	ENPP1_HUMAN
AAPK1_HUMAN	GAK_HUMAN
AAPK1_HUMAN	GRP78_HUMAN
AAPK1_HUMAN	HS90A_HUMAN
AAPK1_HUMAN	HXK4_HUMAN
AAPK1_HUMAN	IF4G2_HUMAN
AAPK1_HUMAN	IMPA1_HUMAN
AAPK1_HUMAN	IRAK1_HUMAN
AAPK1_HUMAN	KC1G3_HUMAN
AAPK1_HUMAN	KPCD2_HUMAN
AAPK1_HUMAN	KPCD_HUMAN
AAPK1_HUMAN	KPYM_HUMAN
AAPK1_HUMAN	MP2K1_HUMAN
AAPK1_HUMAN	NSDHL_HUMAN
AAPK1_HUMAN	OCTC_HUMAN
AAPK1_HUMAN	PAK2_HUMAN
AAPK1_HUMAN	PKD2_HUMAN
AAPK1_HUMAN	PLCB1_HUMAN
AAPK1_HUMAN	PLCB2_HUMAN
AAPK1_HUMAN	PLCD1_HUMAN
AAPK1_HUMAN	PLCG1_HUMAN
AAPK1_HUMAN	PLCG2_HUMAN
AAPK1_HUMAN	RLA1_HUMAN
AAPK1_HUMAN	RT28_HUMAN
AAPK1_HUMAN	STK39_HUMAN
AAPK1_HUMAN	TTK_HUMAN
AAPK1_HUMAN	UDB17_HUMAN
ACADV_HUMAN	ADH1A_HUMAN
ACADV_HUMAN	AKT3_HUMAN
ACADV_HUMAN	ATP7A_HUMAN
ACADV_HUMAN	B4GT1_HUMAN
ACADV_HUMAN	BIG1_HUMAN
ACADV_HUMAN	BUB1_HUMAN
ACADV_HUMAN	CCNH_HUMAN
ACADV_HUMAN	CDC7_HUMAN
ACADV_HUMAN	CDK2_HUMAN
ACADV_HUMAN	CDK9_HUMAN
ACADV_HUMAN	CDKL1_HUMAN
ACADV_HUMAN	CHK1_HUMAN
ACADV_HUMAN	CO6_HUMAN
ACADV_HUMAN	CP39A_HUMAN
ACADV_HUMAN	CP7B1_HUMAN
ACADV_HUMAN	CSKP_HUMAN
ACADV_HUMAN	DHX35_HUMAN
ACADV_HUMAN	ECHA_HUMAN
ACADV_HUMAN	ECHB_HUMAN
ACADV_HUMAN	ECHM_HUMAN
ACADV_HUMAN	ENPP1_HUMAN
ACADV_HUMAN	GAK_HUMAN
ACADV_HUMAN	HCD2_HUMAN
ACADV_HUMAN	HCDH_HUMAN
ACADV_HUMAN	IKKE_HUMAN
ACADV_HUMAN	IRAK1_HUMAN
ACADV_HUMAN	KC1G3_HUMAN
ACADV_HUMAN	KPCD2_HUMAN
ACADV_HUMAN	KPCD_HUMAN
ACADV_HUMAN	LYAG_HUMAN
ACADV_HUMAN	MBL2_HUMAN
ACADV_HUMAN	MP2K1_HUMAN
ACADV_HUMAN	MPIP1_HUMAN
ACADV_HUMAN	NSDHL_HUMAN
ACADV_HUMAN	NUP43_HUMAN
ACADV_HUMAN	P3C2G_HUMAN
ACADV_HUMAN	PKD2_HUMAN
ACADV_HUMAN	PLCB2_HUMAN
ACADV_HUMAN	PLCD1_HUMAN
ACADV_HUMAN	PPB1_HUMAN
ACADV_HUMAN	RAE2_HUMAN
ACADV_HUMAN	STAT3_HUMAN
ACADV_HUMAN	STK39_HUMAN
ACADV_HUMAN	TBB4_HUMAN
ACADV_HUMAN	THIL_HUMAN
ACADV_HUMAN	TTK_HUMAN
ACADV_HUMAN	UCP5_HUMAN
ACADV_HUMAN	UDB17_HUMAN
ACTB_HUMAN	ATPA_HUMAN
ACTB_HUMAN	DYL1_HUMAN
ACTB_HUMAN	EIF3E_HUMAN
ACTB_HUMAN	EIF3I_HUMAN
ACTB_HUMAN	GNAI2_HUMAN
ACTB_HUMAN	HNRH1_HUMAN
ACTB_HUMAN	HNRPD_HUMAN
ACTB_HUMAN	HS90A_HUMAN
ACTB_HUMAN	HS90B_HUMAN
ACTB_HUMAN	HSP7C_HUMAN
ACTB_HUMAN	IF4A2_HUMAN
ACTB_HUMAN	NUCL_HUMAN
ACTB_HUMAN	RAC1_HUMAN
ACTB_HUMAN	RL22_HUMAN
ACTB_HUMAN	RL7_HUMAN
ACTB_HUMAN	RLA0_HUMAN
ACTB_HUMAN	RLA1_HUMAN
ACTB_HUMAN	ROA1_HUMAN
ACTB_HUMAN	ROA2_HUMAN
ACTB_HUMAN	RS10_HUMAN
ACTB_HUMAN	RS13_HUMAN
ACTB_HUMAN	RS18_HUMAN
ACTB_HUMAN	RS19_HUMAN
ACTB_HUMAN	RS24_HUMAN
ACTB_HUMAN	RS7_HUMAN
ACTB_HUMAN	RS8_HUMAN
ACTB_HUMAN	RS9_HUMAN
ACTB_HUMAN	RSSA_HUMAN
ACTB_HUMAN	TBA1A_HUMAN
ACTB_HUMAN	TBA4A_HUMAN
ACTB_HUMAN	TBB2C_HUMAN
ACTB_HUMAN	TBB4_HUMAN
ACTB_HUMAN	TBB5_HUMAN
ACTB_HUMAN	UBIQ_HUMAN
ACTB_HUMAN	YBOX1_HUMAN
ADCY1_HUMAN	ADCY5_HUMAN
ADCY1_HUMAN	CCL20_HUMAN
ADCY1_HUMAN	CCL21_HUMAN
ADCY1_HUMAN	CCL5_HUMAN
ADCY1_HUMAN	DLG4_HUMAN
ADCY1_HUMAN	GBB1_HUMAN
ADCY1_HUMAN	GBG2_HUMAN
ADCY1_HUMAN	GNAI1_HUMAN
ADCY1_HUMAN	GNAI2_HUMAN
ADCY1_HUMAN	GNAI3_HUMAN
ADCY1_HUMAN	GNAZ_HUMAN
ADCY1_HUMAN	GROA_HUMAN
ADCY1_HUMAN	IL8_HUMAN
ADCY1_HUMAN	KNG1_HUMAN
ADCY1_HUMAN	KPYM_HUMAN
ADCY1_HUMAN	NDKB_HUMAN
ADCY1_HUMAN	P2Y12_HUMAN
ADCY1_HUMAN	PAK2_HUMAN
ADCY1_HUMAN	RPB3_HUMAN
ADCY1_HUMAN	SDF1_HUMAN
ADCY1_HUMAN	SSR1_HUMAN
ADCY1_HUMAN	SSR2_HUMAN
ADCY1_HUMAN	SSR3_HUMAN
ADCY1_HUMAN	SSR5_HUMAN
ADCY5_HUMAN	CCL20_HUMAN
ADCY5_HUMAN	CCL21_HUMAN
ADCY5_HUMAN	CCL5_HUMAN
ADCY5_HUMAN	GBB1_HUMAN
ADCY5_HUMAN	GBG2_HUMAN
ADCY5_HUMAN	GNAI1_HUMAN
ADCY5_HUMAN	GNAI2_HUMAN
ADCY5_HUMAN	GNAI3_HUMAN
ADCY5_HUMAN	GNAZ_HUMAN
ADCY5_HUMAN	GROA_HUMAN
ADCY5_HUMAN	IL8_HUMAN
ADCY5_HUMAN	KNG1_HUMAN
ADCY5_HUMAN	KPCA_HUMAN
ADCY5_HUMAN	KPYM_HUMAN
ADCY5_HUMAN	NDKB_HUMAN
ADCY5_HUMAN	P2Y12_HUMAN
ADCY5_HUMAN	RHOD_HUMAN
ADCY5_HUMAN	RPB3_HUMAN
ADCY5_HUMAN	SDF1_HUMAN
ADCY5_HUMAN	SSR1_HUMAN
ADCY5_HUMAN	SSR2_HUMAN
ADCY5_HUMAN	SSR3_HUMAN
ADCY5_HUMAN	SSR5_HUMAN
ADH1A_HUMAN	ADH1G_HUMAN
ADH1A_HUMAN	AKAP1_HUMAN
ADH1A_HUMAN	AKT3_HUMAN
ADH1A_HUMAN	AL3A2_HUMAN
ADH1A_HUMAN	AL7A1_HUMAN
ADH1A_HUMAN	ARSA_HUMAN
ADH1A_HUMAN	B4GT1_HUMAN
ADH1A_HUMAN	CDK2_HUMAN
ADH1A_HUMAN	CDK9_HUMAN
ADH1A_HUMAN	CDKL1_HUMAN
ADH1A_HUMAN	CLK2_HUMAN
ADH1A_HUMAN	CO6_HUMAN
ADH1A_HUMAN	COPA_HUMAN
ADH1A_HUMAN	CP39A_HUMAN
ADH1A_HUMAN	CP7B1_HUMAN
ADH1A_HUMAN	DGKE_HUMAN
ADH1A_HUMAN	DHX35_HUMAN
ADH1A_HUMAN	DLG4_HUMAN
ADH1A_HUMAN	ECHA_HUMAN
ADH1A_HUMAN	ECHB_HUMAN
ADH1A_HUMAN	ECHM_HUMAN
ADH1A_HUMAN	ECHP_HUMAN
ADH1A_HUMAN	GAK_HUMAN
ADH1A_HUMAN	HCD2_HUMAN
ADH1A_HUMAN	HCDH_HUMAN
ADH1A_HUMAN	HD_HUMAN
ADH1A_HUMAN	HXK4_HUMAN
ADH1A_HUMAN	IMPA1_HUMAN
ADH1A_HUMAN	IRAK1_HUMAN
ADH1A_HUMAN	JPH4_HUMAN
ADH1A_HUMAN	KC1G3_HUMAN
ADH1A_HUMAN	KPCD_HUMAN
ADH1A_HUMAN	LYAG_HUMAN
ADH1A_HUMAN	MPIP1_HUMAN
ADH1A_HUMAN	NSDHL_HUMAN
ADH1A_HUMAN	NUP43_HUMAN
ADH1A_HUMAN	OCTC_HUMAN
ADH1A_HUMAN	ODB2_HUMAN
ADH1A_HUMAN	P3C2G_HUMAN
ADH1A_HUMAN	PLCD1_HUMAN
ADH1A_HUMAN	PPB1_HUMAN
ADH1A_HUMAN	RAE2_HUMAN
ADH1A_HUMAN	RASH_HUMAN
ADH1A_HUMAN	SF3B1_HUMAN
ADH1A_HUMAN	SLBP_HUMAN
ADH1A_HUMAN	SSR1_HUMAN
ADH1A_HUMAN	STK39_HUMAN
ADH1A_HUMAN	THIL_HUMAN
ADH1A_HUMAN	TM9S1_HUMAN
ADH1A_HUMAN	UDB17_HUMAN
ADH1G_HUMAN	AKAP1_HUMAN
ADH1G_HUMAN	AL7A1_HUMAN
ADH1G_HUMAN	B4GT1_HUMAN
ADH1G_HUMAN	CDC7_HUMAN
ADH1G_HUMAN	CDK9_HUMAN
ADH1G_HUMAN	CP7B1_HUMAN
ADH1G_HUMAN	ECHM_HUMAN
ADH1G_HUMAN	HCD2_HUMAN
ADH1G_HUMAN	HCDH_HUMAN
ADH1G_HUMAN	HXK4_HUMAN
ADH1G_HUMAN	IMPA1_HUMAN
ADH1G_HUMAN	IRAK1_HUMAN
ADH1G_HUMAN	JPH4_HUMAN
ADH1G_HUMAN	KPYM_HUMAN
ADH1G_HUMAN	NSDHL_HUMAN
ADH1G_HUMAN	ODB2_HUMAN
ADH1G_HUMAN	PAPOA_HUMAN
ADH1G_HUMAN	PLCB2_HUMAN
ADH1G_HUMAN	PLCD1_HUMAN
ADH1G_HUMAN	PPB1_HUMAN
ADH1G_HUMAN	RAE2_HUMAN
ADH1G_HUMAN	RHOD_HUMAN
ADH1G_HUMAN	RLA1_HUMAN
ADH1G_HUMAN	SMC3_HUMAN
ADH1G_HUMAN	SRC_HUMAN
ADH1G_HUMAN	THIL_HUMAN
ADH1G_HUMAN	TLR9_HUMAN
ADH1G_HUMAN	TM50B_HUMAN
ADH6_HUMAN	AKAP1_HUMAN
ADH6_HUMAN	AKT2_HUMAN
ADH6_HUMAN	AL3A2_HUMAN
ADH6_HUMAN	AL7A1_HUMAN
ADH6_HUMAN	BIG1_HUMAN
ADH6_HUMAN	CLK2_HUMAN
ADH6_HUMAN	CO6_HUMAN
ADH6_HUMAN	CP39A_HUMAN
ADH6_HUMAN	DHX35_HUMAN
ADH6_HUMAN	ECHM_HUMAN
ADH6_HUMAN	ECHP_HUMAN
ADH6_HUMAN	GAK_HUMAN
ADH6_HUMAN	HD_HUMAN
ADH6_HUMAN	MP2K1_HUMAN
ADH6_HUMAN	NSDHL_HUMAN
ADH6_HUMAN	P3C2G_HUMAN
ADH6_HUMAN	PLCD1_HUMAN
ADH6_HUMAN	RAE2_HUMAN
ADH6_HUMAN	RT28_HUMAN
ADH6_HUMAN	SSR1_HUMAN
ADH6_HUMAN	TM50B_HUMAN
ADRB2_HUMAN	ADCY1_HUMAN
ADRB2_HUMAN	ADCY5_HUMAN
ADRB2_HUMAN	GBB1_HUMAN
ADRB2_HUMAN	GBG2_HUMAN
ADRB2_HUMAN	GRB2_HUMAN
ADRB2_HUMAN	KPCA_HUMAN
ADRB2_HUMAN	PK3CG_HUMAN
ADRB2_HUMAN	PLCB1_HUMAN
ADRB2_HUMAN	PLCB2_HUMAN
ADRB2_HUMAN	UBIQ_HUMAN
ADT2_HUMAN	AT5F1_HUMAN
ADT2_HUMAN	ATPA_HUMAN
ADT2_HUMAN	ATPD_HUMAN
ADT2_HUMAN	ATPK_HUMAN
ADT2_HUMAN	BUB1_HUMAN
ADT2_HUMAN	CDC7_HUMAN
ADT2_HUMAN	CDK2_HUMAN
ADT2_HUMAN	CHK1_HUMAN
ADT2_HUMAN	COLI_HUMAN
ADT2_HUMAN	CYC_HUMAN
ADT2_HUMAN	EHMT1_HUMAN
ADT2_HUMAN	HCD2_HUMAN
ADT2_HUMAN	IMPA1_HUMAN
ADT2_HUMAN	IRAK1_HUMAN
ADT2_HUMAN	MPIP1_HUMAN
ADT2_HUMAN	PAXI_HUMAN
ADT2_HUMAN	TBB4_HUMAN
ADT2_HUMAN	TF65_HUMAN
AGTR1_HUMAN	ANGT_HUMAN
AGTR1_HUMAN	BKRB2_HUMAN
AGTR1_HUMAN	C5AR_HUMAN
AGTR1_HUMAN	CCL20_HUMAN
AGTR1_HUMAN	CCL21_HUMAN
AGTR1_HUMAN	CCL5_HUMAN
AGTR1_HUMAN	CCR1_HUMAN
AGTR1_HUMAN	CCR2_HUMAN
AGTR1_HUMAN	CCR5_HUMAN
AGTR1_HUMAN	CCR6_HUMAN
AGTR1_HUMAN	COLI_HUMAN
AGTR1_HUMAN	CXCR4_HUMAN
AGTR1_HUMAN	GBB1_HUMAN
AGTR1_HUMAN	GBG2_HUMAN
AGTR1_HUMAN	GNAI1_HUMAN
AGTR1_HUMAN	GNAI2_HUMAN
AGTR1_HUMAN	GNAI3_HUMAN
AGTR1_HUMAN	GNAZ_HUMAN
AGTR1_HUMAN	GROA_HUMAN
AGTR1_HUMAN	IL8_HUMAN
AGTR1_HUMAN	KNG1_HUMAN
AGTR1_HUMAN	P2Y12_HUMAN
AGTR1_HUMAN	P85A_HUMAN
AGTR1_HUMAN	PK3CA_HUMAN
AGTR1_HUMAN	PK3CG_HUMAN
AGTR1_HUMAN	PLCB1_HUMAN
AGTR1_HUMAN	PLCB2_HUMAN
AGTR1_HUMAN	SDF1_HUMAN
AGTR1_HUMAN	SSR1_HUMAN
AGTR1_HUMAN	SSR2_HUMAN
AGTR1_HUMAN	SSR3_HUMAN
AGTR1_HUMAN	SSR5_HUMAN
AKAP1_HUMAN	AL3A2_HUMAN
AKAP1_HUMAN	AL7A1_HUMAN
AKAP1_HUMAN	ATP7A_HUMAN
AKAP1_HUMAN	BIG1_HUMAN
AKAP1_HUMAN	CCR6_HUMAN
AKAP1_HUMAN	CDK10_HUMAN
AKAP1_HUMAN	CHIN_HUMAN
AKAP1_HUMAN	CHK1_HUMAN
AKAP1_HUMAN	CLK2_HUMAN
AKAP1_HUMAN	CO6_HUMAN
AKAP1_HUMAN	CSKP_HUMAN
AKAP1_HUMAN	DHX35_HUMAN
AKAP1_HUMAN	FRM4B_HUMAN
AKAP1_HUMAN	GTF2I_HUMAN
AKAP1_HUMAN	HCD2_HUMAN
AKAP1_HUMAN	HNRPK_HUMAN
AKAP1_HUMAN	JPH4_HUMAN
AKAP1_HUMAN	KPCD_HUMAN
AKAP1_HUMAN	KPYM_HUMAN
AKAP1_HUMAN	MPIP1_HUMAN
AKAP1_HUMAN	NSDHL_HUMAN
AKAP1_HUMAN	NUP43_HUMAN
AKAP1_HUMAN	OCTC_HUMAN
AKAP1_HUMAN	ODB2_HUMAN
AKAP1_HUMAN	P85A_HUMAN
AKAP1_HUMAN	PAK2_HUMAN
AKAP1_HUMAN	PLCG1_HUMAN
AKAP1_HUMAN	RAE2_HUMAN
AKAP1_HUMAN	RT28_HUMAN
AKAP1_HUMAN	TM50B_HUMAN
AKAP1_HUMAN	UDB17_HUMAN
AKT1_HUMAN	2AAA_HUMAN
AKT1_HUMAN	AKT2_HUMAN
AKT1_HUMAN	AKT3_HUMAN
AKT1_HUMAN	ARF6_HUMAN
AKT1_HUMAN	ARHG7_HUMAN
AKT1_HUMAN	CCR5_HUMAN
AKT1_HUMAN	GBG2_HUMAN
AKT1_HUMAN	GNAI1_HUMAN
AKT1_HUMAN	GRB2_HUMAN
AKT1_HUMAN	HD_HUMAN
AKT1_HUMAN	IF4E_HUMAN
AKT1_HUMAN	IKKB_HUMAN
AKT1_HUMAN	IRAK1_HUMAN
AKT1_HUMAN	M3K1_HUMAN
AKT1_HUMAN	MK01_HUMAN
AKT1_HUMAN	MK03_HUMAN
AKT1_HUMAN	MP2K1_HUMAN
AKT1_HUMAN	NFKB1_HUMAN
AKT1_HUMAN	P3C2G_HUMAN
AKT1_HUMAN	P85A_HUMAN
AKT1_HUMAN	P85B_HUMAN
AKT1_HUMAN	PAK2_HUMAN
AKT1_HUMAN	PAXI_HUMAN
AKT1_HUMAN	PK3CA_HUMAN
AKT1_HUMAN	PK3CB_HUMAN
AKT1_HUMAN	PK3CG_HUMAN
AKT1_HUMAN	RAC1_HUMAN
AKT1_HUMAN	RHOA_HUMAN
AKT1_HUMAN	RS6_HUMAN
AKT1_HUMAN	SRC_HUMAN
AKT1_HUMAN	STAT3_HUMAN
AKT1_HUMAN	TF65_HUMAN
AKT1_HUMAN	UBIQ_HUMAN
AKT2_HUMAN	AKT3_HUMAN
AKT2_HUMAN	CDC7_HUMAN
AKT2_HUMAN	CDK2_HUMAN
AKT2_HUMAN	CHK1_HUMAN
AKT2_HUMAN	CLK2_HUMAN
AKT2_HUMAN	COPA_HUMAN
AKT2_HUMAN	ECHM_HUMAN
AKT2_HUMAN	ECHP_HUMAN
AKT2_HUMAN	ERBB2_HUMAN
AKT2_HUMAN	HS90B_HUMAN
AKT2_HUMAN	IKKA_HUMAN
AKT2_HUMAN	IKKB_HUMAN
AKT2_HUMAN	IMPA1_HUMAN
AKT2_HUMAN	KPCD_HUMAN
AKT2_HUMAN	NFKB1_HUMAN
AKT2_HUMAN	OCTC_HUMAN
AKT2_HUMAN	P3C2G_HUMAN
AKT2_HUMAN	P85A_HUMAN
AKT2_HUMAN	PAPOA_HUMAN
AKT2_HUMAN	PK3CB_HUMAN
AKT2_HUMAN	TBB4_HUMAN
AKT2_HUMAN	TERT_HUMAN
AKT2_HUMAN	TF65_HUMAN
AKT3_HUMAN	ARSA_HUMAN
AKT3_HUMAN	B4GT1_HUMAN
AKT3_HUMAN	CDK10_HUMAN
AKT3_HUMAN	CDK9_HUMAN
AKT3_HUMAN	CDKL1_HUMAN
AKT3_HUMAN	CO6_HUMAN
AKT3_HUMAN	COPA_HUMAN
AKT3_HUMAN	COX5A_HUMAN
AKT3_HUMAN	CP7B1_HUMAN
AKT3_HUMAN	ECHA_HUMAN
AKT3_HUMAN	GAK_HUMAN
AKT3_HUMAN	HCDH_HUMAN
AKT3_HUMAN	HXK4_HUMAN
AKT3_HUMAN	IF4G2_HUMAN
AKT3_HUMAN	IKKB_HUMAN
AKT3_HUMAN	IMPA1_HUMAN
AKT3_HUMAN	KC1G3_HUMAN
AKT3_HUMAN	KPCD_HUMAN
AKT3_HUMAN	KPYM_HUMAN
AKT3_HUMAN	LYAG_HUMAN
AKT3_HUMAN	MYC_HUMAN
AKT3_HUMAN	NFKB1_HUMAN
AKT3_HUMAN	NSDHL_HUMAN
AKT3_HUMAN	NUP43_HUMAN
AKT3_HUMAN	OCTC_HUMAN
AKT3_HUMAN	ODB2_HUMAN
AKT3_HUMAN	P3C2G_HUMAN
AKT3_HUMAN	P85A_HUMAN
AKT3_HUMAN	PK3CB_HUMAN
AKT3_HUMAN	PKD2_HUMAN
AKT3_HUMAN	PLCB2_HUMAN
AKT3_HUMAN	PLCD1_HUMAN
AKT3_HUMAN	PPB1_HUMAN
AKT3_HUMAN	RAE2_HUMAN
AKT3_HUMAN	STK39_HUMAN
AKT3_HUMAN	TF65_HUMAN
AKT3_HUMAN	UCP5_HUMAN
AKT3_HUMAN	UDB17_HUMAN
AL3A2_HUMAN	AL7A1_HUMAN
AL3A2_HUMAN	ATP7A_HUMAN
AL3A2_HUMAN	B4GT1_HUMAN
AL3A2_HUMAN	CDK2_HUMAN
AL3A2_HUMAN	CDK9_HUMAN
AL3A2_HUMAN	CDKL1_HUMAN
AL3A2_HUMAN	CHIN_HUMAN
AL3A2_HUMAN	COPA_HUMAN
AL3A2_HUMAN	CP39A_HUMAN
AL3A2_HUMAN	CP7B1_HUMAN
AL3A2_HUMAN	DGKE_HUMAN
AL3A2_HUMAN	DHX35_HUMAN
AL3A2_HUMAN	ECHA_HUMAN
AL3A2_HUMAN	ECHB_HUMAN
AL3A2_HUMAN	ECHM_HUMAN
AL3A2_HUMAN	ECHP_HUMAN
AL3A2_HUMAN	GAK_HUMAN
AL3A2_HUMAN	HCD2_HUMAN
AL3A2_HUMAN	HCDH_HUMAN
AL3A2_HUMAN	HXK4_HUMAN
AL3A2_HUMAN	KC1G3_HUMAN
AL3A2_HUMAN	KPCD_HUMAN
AL3A2_HUMAN	LYAG_HUMAN
AL3A2_HUMAN	MPIP1_HUMAN
AL3A2_HUMAN	NFYA_HUMAN
AL3A2_HUMAN	NSDHL_HUMAN
AL3A2_HUMAN	NUP43_HUMAN
AL3A2_HUMAN	OCTC_HUMAN
AL3A2_HUMAN	ODB2_HUMAN
AL3A2_HUMAN	P3C2G_HUMAN
AL3A2_HUMAN	PLCD1_HUMAN
AL3A2_HUMAN	PPB1_HUMAN
AL3A2_HUMAN	RAE2_HUMAN
AL3A2_HUMAN	RT28_HUMAN
AL3A2_HUMAN	SSR1_HUMAN
AL3A2_HUMAN	STK39_HUMAN
AL3A2_HUMAN	THIL_HUMAN
AL3A2_HUMAN	TM50B_HUMAN
AL3A2_HUMAN	UDB17_HUMAN
AL7A1_HUMAN	ATP7A_HUMAN
AL7A1_HUMAN	CDK9_HUMAN
AL7A1_HUMAN	CO6_HUMAN
AL7A1_HUMAN	DHX35_HUMAN
AL7A1_HUMAN	ECHA_HUMAN
AL7A1_HUMAN	ECHM_HUMAN
AL7A1_HUMAN	ECHP_HUMAN
AL7A1_HUMAN	HCD2_HUMAN
AL7A1_HUMAN	HCDH_HUMAN
AL7A1_HUMAN	IMPA1_HUMAN
AL7A1_HUMAN	KC1G3_HUMAN
AL7A1_HUMAN	KPCD2_HUMAN
AL7A1_HUMAN	KPCD_HUMAN
AL7A1_HUMAN	MP2K1_HUMAN
AL7A1_HUMAN	NSDHL_HUMAN
AL7A1_HUMAN	OCTC_HUMAN
AL7A1_HUMAN	ODB2_HUMAN
AL7A1_HUMAN	PLCD1_HUMAN
AL7A1_HUMAN	PPB1_HUMAN
AL7A1_HUMAN	SMC3_HUMAN
AL7A1_HUMAN	SSR1_HUMAN
AL7A1_HUMAN	STK39_HUMAN
AL7A1_HUMAN	THIL_HUMAN
ANGT_HUMAN	ADCY1_HUMAN
ANGT_HUMAN	ADCY5_HUMAN
ANGT_HUMAN	ARHG1_HUMAN
ANGT_HUMAN	BKRB2_HUMAN
ANGT_HUMAN	C5AR_HUMAN
ANGT_HUMAN	CCL20_HUMAN
ANGT_HUMAN	CCL21_HUMAN
ANGT_HUMAN	CCL5_HUMAN
ANGT_HUMAN	CCR1_HUMAN
ANGT_HUMAN	CCR2_HUMAN
ANGT_HUMAN	CCR5_HUMAN
ANGT_HUMAN	CCR6_HUMAN
ANGT_HUMAN	COLI_HUMAN
ANGT_HUMAN	CXCR4_HUMAN
ANGT_HUMAN	GBB1_HUMAN
ANGT_HUMAN	GBG2_HUMAN
ANGT_HUMAN	GNA12_HUMAN
ANGT_HUMAN	GNAI1_HUMAN
ANGT_HUMAN	GNAI2_HUMAN
ANGT_HUMAN	GNAI3_HUMAN
ANGT_HUMAN	GNAZ_HUMAN
ANGT_HUMAN	GROA_HUMAN
ANGT_HUMAN	IL8_HUMAN
ANGT_HUMAN	KNG1_HUMAN
ANGT_HUMAN	P2Y12_HUMAN
ANGT_HUMAN	P85A_HUMAN
ANGT_HUMAN	PK3CA_HUMAN
ANGT_HUMAN	PK3CG_HUMAN
ANGT_HUMAN	PLCB1_HUMAN
ANGT_HUMAN	PLCB2_HUMAN
ANGT_HUMAN	PLCG1_HUMAN
ANGT_HUMAN	SDF1_HUMAN
ANGT_HUMAN	SSR1_HUMAN
ANGT_HUMAN	SSR2_HUMAN
ANGT_HUMAN	SSR3_HUMAN
ANGT_HUMAN	SSR5_HUMAN
ARF6_HUMAN	BIG1_HUMAN
ARF6_HUMAN	CCR5_HUMAN
ARF6_HUMAN	DHX35_HUMAN
ARF6_HUMAN	DHX9_HUMAN
ARF6_HUMAN	DLG4_HUMAN
ARF6_HUMAN	DYHC1_HUMAN
ARF6_HUMAN	EIF3E_HUMAN
ARF6_HUMAN	EIF3I_HUMAN
ARF6_HUMAN	GDIB_HUMAN
ARF6_HUMAN	GTF2I_HUMAN
ARF6_HUMAN	HNRPM_HUMAN
ARF6_HUMAN	IF4G1_HUMAN
ARF6_HUMAN	NUDC_HUMAN
ARF6_HUMAN	PAXI_HUMAN
ARF6_HUMAN	RAC1_HUMAN
ARF6_HUMAN	RCC2_HUMAN
ARF6_HUMAN	RHOA_HUMAN
ARF6_HUMAN	RPN1_HUMAN
ARF6_HUMAN	RPN2_HUMAN
ARF6_HUMAN	RU2A_HUMAN
ARF6_HUMAN	SF3A1_HUMAN
ARF6_HUMAN	SF3B1_HUMAN
ARF6_HUMAN	SSRD_HUMAN
ARHG1_HUMAN	ECT2_HUMAN
ARHG1_HUMAN	GBG2_HUMAN
ARHG1_HUMAN	GNA12_HUMAN
ARHG1_HUMAN	KPCA_HUMAN
ARHG1_HUMAN	RAC1_HUMAN
ARHG1_HUMAN	RHG04_HUMAN
ARHG7_HUMAN	ARHG1_HUMAN
ARHG7_HUMAN	PAXI_HUMAN
ARHG7_HUMAN	RHG04_HUMAN
ARSA_HUMAN	B4GT1_HUMAN
ARSA_HUMAN	BUB1_HUMAN
ARSA_HUMAN	CDK2_HUMAN
ARSA_HUMAN	CDK9_HUMAN
ARSA_HUMAN	CDKL1_HUMAN
ARSA_HUMAN	ECHA_HUMAN
ARSA_HUMAN	GAK_HUMAN
ARSA_HUMAN	HXK4_HUMAN
ARSA_HUMAN	IKKE_HUMAN
ARSA_HUMAN	IRAK1_HUMAN
ARSA_HUMAN	JPH4_HUMAN
ARSA_HUMAN	KC1G3_HUMAN
ARSA_HUMAN	KPCD_HUMAN
ARSA_HUMAN	NSDHL_HUMAN
ARSA_HUMAN	PAK2_HUMAN
ARSA_HUMAN	RAE2_HUMAN
ARSA_HUMAN	RHOD_HUMAN
ARSA_HUMAN	SF3B1_HUMAN
ARSA_HUMAN	SSR1_HUMAN
ARSA_HUMAN	STAT3_HUMAN
AT5F1_HUMAN	ATPK_HUMAN
AT5F1_HUMAN	COX5A_HUMAN
AT5F1_HUMAN	CYC_HUMAN
AT5F1_HUMAN	DHX35_HUMAN
AT5F1_HUMAN	HCD2_HUMAN
AT5F1_HUMAN	HCDH_HUMAN
AT5F1_HUMAN	NUP43_HUMAN
AT5F1_HUMAN	SLBP_HUMAN
ATP7A_HUMAN	ATPD_HUMAN
ATP7A_HUMAN	B4GT1_HUMAN
ATP7A_HUMAN	CCR6_HUMAN
ATP7A_HUMAN	CDK9_HUMAN
ATP7A_HUMAN	CDKL1_HUMAN
ATP7A_HUMAN	CO6_HUMAN
ATP7A_HUMAN	COLI_HUMAN
ATP7A_HUMAN	COPA_HUMAN
ATP7A_HUMAN	CSKP_HUMAN
ATP7A_HUMAN	DHX35_HUMAN
ATP7A_HUMAN	ECHA_HUMAN
ATP7A_HUMAN	ECHM_HUMAN
ATP7A_HUMAN	ECHP_HUMAN
ATP7A_HUMAN	HCDH_HUMAN
ATP7A_HUMAN	HD_HUMAN
ATP7A_HUMAN	IF4E_HUMAN
ATP7A_HUMAN	KPCD_HUMAN
ATP7A_HUMAN	KPYM_HUMAN
ATP7A_HUMAN	LIS1_HUMAN
ATP7A_HUMAN	NSDHL_HUMAN
ATP7A_HUMAN	OCTC_HUMAN
ATP7A_HUMAN	ODB2_HUMAN
ATP7A_HUMAN	RAE2_HUMAN
ATP7A_HUMAN	RT28_HUMAN
ATP7A_HUMAN	STK39_HUMAN
ATP7A_HUMAN	UDB17_HUMAN
ATPA_HUMAN	AT5F1_HUMAN
ATPA_HUMAN	ATPD_HUMAN
ATPA_HUMAN	ATPK_HUMAN
ATPA_HUMAN	COX5A_HUMAN
ATPA_HUMAN	CYC_HUMAN
ATPA_HUMAN	GDIB_HUMAN
ATPA_HUMAN	TF65_HUMAN
ATPD_HUMAN	AT5F1_HUMAN
ATPD_HUMAN	ATPK_HUMAN
ATPD_HUMAN	CDK10_HUMAN
ATPD_HUMAN	CDK2_HUMAN
ATPD_HUMAN	CDK9_HUMAN
ATPD_HUMAN	CDKL1_HUMAN
ATPD_HUMAN	CHK1_HUMAN
ATPD_HUMAN	CLK2_HUMAN
ATPD_HUMAN	COX5A_HUMAN
ATPD_HUMAN	CYC_HUMAN
ATPD_HUMAN	ECHA_HUMAN
ATPD_HUMAN	EHMT1_HUMAN
ATPD_HUMAN	ENPP1_HUMAN
ATPD_HUMAN	FRM4B_HUMAN
ATPD_HUMAN	GAK_HUMAN
ATPD_HUMAN	HCDH_HUMAN
ATPD_HUMAN	HXK4_HUMAN
ATPD_HUMAN	IRAK1_HUMAN
ATPD_HUMAN	JPH4_HUMAN
ATPD_HUMAN	LYAG_HUMAN
ATPD_HUMAN	NSDHL_HUMAN
ATPD_HUMAN	NUP43_HUMAN
ATPD_HUMAN	ODB2_HUMAN
ATPD_HUMAN	RAE2_HUMAN
ATPD_HUMAN	RHOD_HUMAN
ATPD_HUMAN	RT28_HUMAN
ATPD_HUMAN	SSRD_HUMAN
ATPD_HUMAN	STK39_HUMAN
ATPD_HUMAN	THIL_HUMAN
ATPD_HUMAN	TLR9_HUMAN
ATPK_HUMAN	COX5A_HUMAN
ATPK_HUMAN	CYC_HUMAN
ATPK_HUMAN	PRP4_HUMAN
ATPK_HUMAN	RLA1_HUMAN
AURKB_HUMAN	CDC20_HUMAN
AURKB_HUMAN	CENPR_HUMAN
AURKB_HUMAN	MD2L1_HUMAN
AURKB_HUMAN	NUDC_HUMAN
AURKB_HUMAN	RCC2_HUMAN
AURKB_HUMAN	RS27_HUMAN
AURKB_HUMAN	UBIQ_HUMAN
AURKB_HUMAN	XPO1_HUMAN
B4GT1_HUMAN	CALM_HUMAN
B4GT1_HUMAN	CCR6_HUMAN
B4GT1_HUMAN	CDC7_HUMAN
B4GT1_HUMAN	CDK10_HUMAN
B4GT1_HUMAN	CDK2_HUMAN
B4GT1_HUMAN	CDK9_HUMAN
B4GT1_HUMAN	CDKL1_HUMAN
B4GT1_HUMAN	CHK1_HUMAN
B4GT1_HUMAN	CLK2_HUMAN
B4GT1_HUMAN	CP7B1_HUMAN
B4GT1_HUMAN	CSKP_HUMAN
B4GT1_HUMAN	DGKE_HUMAN
B4GT1_HUMAN	DHX35_HUMAN
B4GT1_HUMAN	DLG4_HUMAN
B4GT1_HUMAN	GAK_HUMAN
B4GT1_HUMAN	GTF2I_HUMAN
B4GT1_HUMAN	HD_HUMAN
B4GT1_HUMAN	IRAK1_HUMAN
B4GT1_HUMAN	KC1G3_HUMAN
B4GT1_HUMAN	KPCD2_HUMAN
B4GT1_HUMAN	KPCD_HUMAN
B4GT1_HUMAN	LIS1_HUMAN
B4GT1_HUMAN	NSDHL_HUMAN
B4GT1_HUMAN	OCTC_HUMAN
B4GT1_HUMAN	ODB2_HUMAN
B4GT1_HUMAN	PKD2_HUMAN
B4GT1_HUMAN	PLCD1_HUMAN
B4GT1_HUMAN	RAE2_HUMAN
B4GT1_HUMAN	RHOD_HUMAN
B4GT1_HUMAN	RT28_HUMAN
B4GT1_HUMAN	STAT3_HUMAN
B4GT1_HUMAN	STK39_HUMAN
B4GT1_HUMAN	TM9S1_HUMAN
B4GT1_HUMAN	UDB17_HUMAN
BIG1_HUMAN	CCR6_HUMAN
BIG1_HUMAN	CDK10_HUMAN
BIG1_HUMAN	CO6_HUMAN
BIG1_HUMAN	ECHP_HUMAN
BIG1_HUMAN	FRM4B_HUMAN
BIG1_HUMAN	GAK_HUMAN
BIG1_HUMAN	HCDH_HUMAN
BIG1_HUMAN	HXK4_HUMAN
BIG1_HUMAN	KPCD2_HUMAN
BIG1_HUMAN	KPCD_HUMAN
BIG1_HUMAN	NSDHL_HUMAN
BIG1_HUMAN	NUP43_HUMAN
BIG1_HUMAN	PAK2_HUMAN
BIG1_HUMAN	PLCD1_HUMAN
BIG1_HUMAN	PLCG1_HUMAN
BIG1_HUMAN	RT28_HUMAN
BIG1_HUMAN	SMC3_HUMAN
BIG1_HUMAN	UDB17_HUMAN
BIRC5_HUMAN	AURKB_HUMAN
BIRC5_HUMAN	BUB1B_HUMAN
BIRC5_HUMAN	BUB1_HUMAN
BIRC5_HUMAN	BUB3_HUMAN
BIRC5_HUMAN	CASP3_HUMAN
BIRC5_HUMAN	CDC20_HUMAN
BIRC5_HUMAN	CENPA_HUMAN
BIRC5_HUMAN	CENPF_HUMAN
BIRC5_HUMAN	CENPR_HUMAN
BIRC5_HUMAN	IRAK1_HUMAN
BIRC5_HUMAN	LIS1_HUMAN
BIRC5_HUMAN	MARE1_HUMAN
BIRC5_HUMAN	MD2L1_HUMAN
BIRC5_HUMAN	NUDC_HUMAN
BIRC5_HUMAN	NUP43_HUMAN
BIRC5_HUMAN	PLK1_HUMAN
BIRC5_HUMAN	PP1G_HUMAN
BIRC5_HUMAN	RCC2_HUMAN
BIRC5_HUMAN	RS27_HUMAN
BIRC5_HUMAN	SEC13_HUMAN
BIRC5_HUMAN	XPO1_HUMAN
BKRB2_HUMAN	ADCY1_HUMAN
BKRB2_HUMAN	ADCY5_HUMAN
BKRB2_HUMAN	ARHG1_HUMAN
BKRB2_HUMAN	C5AR_HUMAN
BKRB2_HUMAN	CCL20_HUMAN
BKRB2_HUMAN	CCL21_HUMAN
BKRB2_HUMAN	CCL5_HUMAN
BKRB2_HUMAN	CCR1_HUMAN
BKRB2_HUMAN	CCR2_HUMAN
BKRB2_HUMAN	CCR5_HUMAN
BKRB2_HUMAN	CCR6_HUMAN
BKRB2_HUMAN	COLI_HUMAN
BKRB2_HUMAN	CXCR4_HUMAN
BKRB2_HUMAN	GBB1_HUMAN
BKRB2_HUMAN	GBG2_HUMAN
BKRB2_HUMAN	GNA12_HUMAN
BKRB2_HUMAN	GNAI1_HUMAN
BKRB2_HUMAN	GNAI2_HUMAN
BKRB2_HUMAN	GNAI3_HUMAN
BKRB2_HUMAN	GNAZ_HUMAN
BKRB2_HUMAN	GROA_HUMAN
BKRB2_HUMAN	IL8_HUMAN
BKRB2_HUMAN	KNG1_HUMAN
BKRB2_HUMAN	P2Y12_HUMAN
BKRB2_HUMAN	P85A_HUMAN
BKRB2_HUMAN	PK3CA_HUMAN
BKRB2_HUMAN	PK3CG_HUMAN
BKRB2_HUMAN	PLCB1_HUMAN
BKRB2_HUMAN	PLCB2_HUMAN
BKRB2_HUMAN	SDF1_HUMAN
BKRB2_HUMAN	SSR1_HUMAN
BKRB2_HUMAN	SSR2_HUMAN
BKRB2_HUMAN	SSR3_HUMAN
BKRB2_HUMAN	SSR5_HUMAN
BUB1B_HUMAN	AURKB_HUMAN
BUB1B_HUMAN	BUB1_HUMAN
BUB1B_HUMAN	CDC20_HUMAN
BUB1B_HUMAN	CDC2_HUMAN
BUB1B_HUMAN	CENPF_HUMAN
BUB1B_HUMAN	CENPR_HUMAN
BUB1B_HUMAN	MD2L1_HUMAN
BUB1B_HUMAN	NEK2_HUMAN
BUB1B_HUMAN	NUDC_HUMAN
BUB1B_HUMAN	PLK1_HUMAN
BUB1B_HUMAN	RCC2_HUMAN
BUB1B_HUMAN	RS27_HUMAN
BUB1B_HUMAN	TTK_HUMAN
BUB1B_HUMAN	UBIQ_HUMAN
BUB1B_HUMAN	XPO1_HUMAN
BUB1_HUMAN	AURKB_HUMAN
BUB1_HUMAN	CDC20_HUMAN
BUB1_HUMAN	CDC7_HUMAN
BUB1_HUMAN	CENPF_HUMAN
BUB1_HUMAN	CENPR_HUMAN
BUB1_HUMAN	CHK1_HUMAN
BUB1_HUMAN	ENPP1_HUMAN
BUB1_HUMAN	GAK_HUMAN
BUB1_HUMAN	HCDH_HUMAN
BUB1_HUMAN	IRAK1_HUMAN
BUB1_HUMAN	MD2L1_HUMAN
BUB1_HUMAN	MPIP1_HUMAN
BUB1_HUMAN	NUDC_HUMAN
BUB1_HUMAN	PLK1_HUMAN
BUB1_HUMAN	PRKDC_HUMAN
BUB1_HUMAN	RCC2_HUMAN
BUB1_HUMAN	RS27_HUMAN
BUB1_HUMAN	SMC3_HUMAN
BUB1_HUMAN	TBB4_HUMAN
BUB1_HUMAN	TTK_HUMAN
BUB1_HUMAN	XPO1_HUMAN
BUB3_HUMAN	AURKB_HUMAN
BUB3_HUMAN	BUB1B_HUMAN
BUB3_HUMAN	BUB1_HUMAN
BUB3_HUMAN	CDC20_HUMAN
BUB3_HUMAN	CDC2_HUMAN
BUB3_HUMAN	CENPA_HUMAN
BUB3_HUMAN	CENPF_HUMAN
BUB3_HUMAN	CENPR_HUMAN
BUB3_HUMAN	LIS1_HUMAN
BUB3_HUMAN	MARE1_HUMAN
BUB3_HUMAN	MD2L1_HUMAN
BUB3_HUMAN	NEK2_HUMAN
BUB3_HUMAN	NUDC_HUMAN
BUB3_HUMAN	NUP43_HUMAN
BUB3_HUMAN	PLK1_HUMAN
BUB3_HUMAN	PP1G_HUMAN
BUB3_HUMAN	RCC2_HUMAN
BUB3_HUMAN	RS27_HUMAN
BUB3_HUMAN	SEC13_HUMAN
BUB3_HUMAN	SFRS5_HUMAN
BUB3_HUMAN	TTK_HUMAN
BUB3_HUMAN	UBIQ_HUMAN
BUB3_HUMAN	XPO1_HUMAN
C5AR_HUMAN	ADCY1_HUMAN
C5AR_HUMAN	ADCY5_HUMAN
C5AR_HUMAN	ARHG1_HUMAN
C5AR_HUMAN	CCL20_HUMAN
C5AR_HUMAN	CCL21_HUMAN
C5AR_HUMAN	CCL5_HUMAN
C5AR_HUMAN	CCR1_HUMAN
C5AR_HUMAN	CCR2_HUMAN
C5AR_HUMAN	CCR5_HUMAN
C5AR_HUMAN	CCR6_HUMAN
C5AR_HUMAN	COLI_HUMAN
C5AR_HUMAN	CXCR4_HUMAN
C5AR_HUMAN	GBB1_HUMAN
C5AR_HUMAN	GBG2_HUMAN
C5AR_HUMAN	GNA12_HUMAN
C5AR_HUMAN	GNAI1_HUMAN
C5AR_HUMAN	GNAI2_HUMAN
C5AR_HUMAN	GNAI3_HUMAN
C5AR_HUMAN	GNAZ_HUMAN
C5AR_HUMAN	GROA_HUMAN
C5AR_HUMAN	IL8_HUMAN
C5AR_HUMAN	KNG1_HUMAN
C5AR_HUMAN	P2Y12_HUMAN
C5AR_HUMAN	PK3CG_HUMAN
C5AR_HUMAN	PLCB1_HUMAN
C5AR_HUMAN	PLCB2_HUMAN
C5AR_HUMAN	RS19_HUMAN
C5AR_HUMAN	SDF1_HUMAN
C5AR_HUMAN	SSR1_HUMAN
C5AR_HUMAN	SSR2_HUMAN
C5AR_HUMAN	SSR3_HUMAN
C5AR_HUMAN	SSR5_HUMAN
CALM_HUMAN	AKT1_HUMAN
CALM_HUMAN	DLG4_HUMAN
CALM_HUMAN	HS90A_HUMAN
CALM_HUMAN	PAXI_HUMAN
CALM_HUMAN	RASH_HUMAN
CALM_HUMAN	TF65_HUMAN
CASP3_HUMAN	1433E_HUMAN
CASP3_HUMAN	AKT1_HUMAN
CASP3_HUMAN	AKT2_HUMAN
CASP3_HUMAN	AKT3_HUMAN
CASP3_HUMAN	CDC2_HUMAN
CASP3_HUMAN	CDC7_HUMAN
CASP3_HUMAN	CDK2_HUMAN
CASP3_HUMAN	CHK1_HUMAN
CASP3_HUMAN	HD_HUMAN
CASP3_HUMAN	HXK4_HUMAN
CASP3_HUMAN	IF4B_HUMAN
CASP3_HUMAN	IF4G1_HUMAN
CASP3_HUMAN	IKBA_HUMAN
CASP3_HUMAN	IKKA_HUMAN
CASP3_HUMAN	KPCD_HUMAN
CASP3_HUMAN	M3K1_HUMAN
CASP3_HUMAN	MK03_HUMAN
CASP3_HUMAN	MP2K1_HUMAN
CASP3_HUMAN	MPIP1_HUMAN
CASP3_HUMAN	P53_HUMAN
CASP3_HUMAN	PAK1_HUMAN
CASP3_HUMAN	PAK2_HUMAN
CASP3_HUMAN	UCP5_HUMAN
CCL20_HUMAN	ARHG1_HUMAN
CCL20_HUMAN	CCL21_HUMAN
CCL20_HUMAN	GBG2_HUMAN
CCL20_HUMAN	RL19_HUMAN
CCL21_HUMAN	ARHG1_HUMAN
CCL21_HUMAN	GBG2_HUMAN
CCL5_HUMAN	ARHG1_HUMAN
CCL5_HUMAN	CCL20_HUMAN
CCL5_HUMAN	CCL21_HUMAN
CCL5_HUMAN	GBG2_HUMAN
CCL5_HUMAN	GRB2_HUMAN
CCL5_HUMAN	PK3CB_HUMAN
CCL5_HUMAN	RL6_HUMAN
CCNH_HUMAN	CDK10_HUMAN
CCNH_HUMAN	ELOB_HUMAN
CCNH_HUMAN	MD2L1_HUMAN
CCNH_HUMAN	MPIP1_HUMAN
CCNH_HUMAN	PAK2_HUMAN
CCNH_HUMAN	PPB1_HUMAN
CCNH_HUMAN	SMD2_HUMAN
CCR1_HUMAN	ADCY1_HUMAN
CCR1_HUMAN	ADCY5_HUMAN
CCR1_HUMAN	ARHG1_HUMAN
CCR1_HUMAN	CCL20_HUMAN
CCR1_HUMAN	CCL21_HUMAN
CCR1_HUMAN	CCL5_HUMAN
CCR1_HUMAN	CCR2_HUMAN
CCR1_HUMAN	CCR5_HUMAN
CCR1_HUMAN	CCR6_HUMAN
CCR1_HUMAN	COLI_HUMAN
CCR1_HUMAN	GBB1_HUMAN
CCR1_HUMAN	GBG2_HUMAN
CCR1_HUMAN	GNA12_HUMAN
CCR1_HUMAN	GNAI1_HUMAN
CCR1_HUMAN	GNAI2_HUMAN
CCR1_HUMAN	GNAI3_HUMAN
CCR1_HUMAN	GNAZ_HUMAN
CCR1_HUMAN	GROA_HUMAN
CCR1_HUMAN	IL8_HUMAN
CCR1_HUMAN	KNG1_HUMAN
CCR1_HUMAN	P2Y12_HUMAN
CCR1_HUMAN	PK3CG_HUMAN
CCR1_HUMAN	PLCB1_HUMAN
CCR1_HUMAN	PLCB2_HUMAN
CCR1_HUMAN	SDF1_HUMAN
CCR1_HUMAN	SSR1_HUMAN
CCR1_HUMAN	SSR2_HUMAN
CCR1_HUMAN	SSR3_HUMAN
CCR1_HUMAN	SSR5_HUMAN
CCR2_HUMAN	ADCY1_HUMAN
CCR2_HUMAN	ADCY5_HUMAN
CCR2_HUMAN	ARHG1_HUMAN
CCR2_HUMAN	CCL20_HUMAN
CCR2_HUMAN	CCL21_HUMAN
CCR2_HUMAN	CCL5_HUMAN
CCR2_HUMAN	CCR5_HUMAN
CCR2_HUMAN	CCR6_HUMAN
CCR2_HUMAN	COLI_HUMAN
CCR2_HUMAN	GBB1_HUMAN
CCR2_HUMAN	GBG2_HUMAN
CCR2_HUMAN	GNA12_HUMAN
CCR2_HUMAN	GNAI1_HUMAN
CCR2_HUMAN	GNAI2_HUMAN
CCR2_HUMAN	GNAI3_HUMAN
CCR2_HUMAN	GNAZ_HUMAN
CCR2_HUMAN	GROA_HUMAN
CCR2_HUMAN	IL8_HUMAN
CCR2_HUMAN	KNG1_HUMAN
CCR2_HUMAN	P2Y12_HUMAN
CCR2_HUMAN	PK3CG_HUMAN
CCR2_HUMAN	PLCB1_HUMAN
CCR2_HUMAN	PLCB2_HUMAN
CCR2_HUMAN	SDF1_HUMAN
CCR2_HUMAN	SSR1_HUMAN
CCR2_HUMAN	SSR2_HUMAN
CCR2_HUMAN	SSR3_HUMAN
CCR2_HUMAN	SSR5_HUMAN
CCR5_HUMAN	ADCY1_HUMAN
CCR5_HUMAN	ADCY5_HUMAN
CCR5_HUMAN	ARHG1_HUMAN
CCR5_HUMAN	CCL20_HUMAN
CCR5_HUMAN	CCL21_HUMAN
CCR5_HUMAN	CCL5_HUMAN
CCR5_HUMAN	CCR6_HUMAN
CCR5_HUMAN	COLI_HUMAN
CCR5_HUMAN	GBB1_HUMAN
CCR5_HUMAN	GBG2_HUMAN
CCR5_HUMAN	GNA12_HUMAN
CCR5_HUMAN	GNAI1_HUMAN
CCR5_HUMAN	GNAI2_HUMAN
CCR5_HUMAN	GNAI3_HUMAN
CCR5_HUMAN	GNAZ_HUMAN
CCR5_HUMAN	GROA_HUMAN
CCR5_HUMAN	IL8_HUMAN
CCR5_HUMAN	KNG1_HUMAN
CCR5_HUMAN	P2Y12_HUMAN
CCR5_HUMAN	PK3CG_HUMAN
CCR5_HUMAN	PLCB1_HUMAN
CCR5_HUMAN	PLCB2_HUMAN
CCR5_HUMAN	RAC1_HUMAN
CCR5_HUMAN	RHOA_HUMAN
CCR5_HUMAN	SDF1_HUMAN
CCR5_HUMAN	SSR1_HUMAN
CCR5_HUMAN	SSR2_HUMAN
CCR5_HUMAN	SSR3_HUMAN
CCR5_HUMAN	SSR5_HUMAN
CCR6_HUMAN	ADCY1_HUMAN
CCR6_HUMAN	ADCY5_HUMAN
CCR6_HUMAN	ARHG1_HUMAN
CCR6_HUMAN	CCL20_HUMAN
CCR6_HUMAN	CCL21_HUMAN
CCR6_HUMAN	CCL5_HUMAN
CCR6_HUMAN	COLI_HUMAN
CCR6_HUMAN	DHX35_HUMAN
CCR6_HUMAN	GBB1_HUMAN
CCR6_HUMAN	GBG2_HUMAN
CCR6_HUMAN	GNA12_HUMAN
CCR6_HUMAN	GNAI1_HUMAN
CCR6_HUMAN	GNAI2_HUMAN
CCR6_HUMAN	GNAI3_HUMAN
CCR6_HUMAN	GNAZ_HUMAN
CCR6_HUMAN	GROA_HUMAN
CCR6_HUMAN	HCDH_HUMAN
CCR6_HUMAN	HXK4_HUMAN
CCR6_HUMAN	IL8_HUMAN
CCR6_HUMAN	KC1G3_HUMAN
CCR6_HUMAN	KNG1_HUMAN
CCR6_HUMAN	KPCD2_HUMAN
CCR6_HUMAN	KPCD_HUMAN
CCR6_HUMAN	MBL2_HUMAN
CCR6_HUMAN	MP2K1_HUMAN
CCR6_HUMAN	MPIP1_HUMAN
CCR6_HUMAN	ODB2_HUMAN
CCR6_HUMAN	P2Y12_HUMAN
CCR6_HUMAN	PK3CG_HUMAN
CCR6_HUMAN	PLCB1_HUMAN
CCR6_HUMAN	PLCB2_HUMAN
CCR6_HUMAN	PPB1_HUMAN
CCR6_HUMAN	RAE2_HUMAN
CCR6_HUMAN	RL37_HUMAN
CCR6_HUMAN	SDF1_HUMAN
CCR6_HUMAN	SSR1_HUMAN
CCR6_HUMAN	SSR2_HUMAN
CCR6_HUMAN	SSR3_HUMAN
CCR6_HUMAN	SSR5_HUMAN
CCR6_HUMAN	TM50B_HUMAN
CCR6_HUMAN	UDB17_HUMAN
CDC20_HUMAN	CDC2_HUMAN
CDC20_HUMAN	CDK10_HUMAN
CDC20_HUMAN	CENPR_HUMAN
CDC20_HUMAN	MD2L1_HUMAN
CDC20_HUMAN	MPIP1_HUMAN
CDC20_HUMAN	NEK2_HUMAN
CDC20_HUMAN	NUDC_HUMAN
CDC20_HUMAN	RCC2_HUMAN
CDC20_HUMAN	TTK_HUMAN
CDC20_HUMAN	UBIQ_HUMAN
CDC20_HUMAN	XPO1_HUMAN
CDC2_HUMAN	AURKB_HUMAN
CDC2_HUMAN	BIRC5_HUMAN
CDC2_HUMAN	CCNH_HUMAN
CDC2_HUMAN	CDC7_HUMAN
CDC2_HUMAN	CDK10_HUMAN
CDC2_HUMAN	CDK2_HUMAN
CDC2_HUMAN	CDK9_HUMAN
CDC2_HUMAN	CHK1_HUMAN
CDC2_HUMAN	EF1D_HUMAN
CDC2_HUMAN	ERCC2_HUMAN
CDC2_HUMAN	FYN_HUMAN
CDC2_HUMAN	MD2L1_HUMAN
CDC2_HUMAN	MK01_HUMAN
CDC2_HUMAN	MK03_HUMAN
CDC2_HUMAN	MPIP1_HUMAN
CDC2_HUMAN	NEK2_HUMAN
CDC2_HUMAN	NUCL_HUMAN
CDC2_HUMAN	P53_HUMAN
CDC2_HUMAN	RAF1_HUMAN
CDC2_HUMAN	TBA1A_HUMAN
CDC2_HUMAN	TBA4A_HUMAN
CDC2_HUMAN	TBB2C_HUMAN
CDC2_HUMAN	TBB5_HUMAN
CDC2_HUMAN	TF2H4_HUMAN
CDC2_HUMAN	UBIQ_HUMAN
CDC42_HUMAN	ARHG7_HUMAN
CDC42_HUMAN	ECT2_HUMAN
CDC42_HUMAN	EF1G_HUMAN
CDC42_HUMAN	GDIB_HUMAN
CDC42_HUMAN	KPCA_HUMAN
CDC42_HUMAN	P53_HUMAN
CDC42_HUMAN	RHG04_HUMAN
CDC7_HUMAN	CDK10_HUMAN
CDC7_HUMAN	CDK2_HUMAN
CDC7_HUMAN	CDK7_HUMAN
CDC7_HUMAN	CDK9_HUMAN
CDC7_HUMAN	CDKL1_HUMAN
CDC7_HUMAN	CHK1_HUMAN
CDC7_HUMAN	CLK2_HUMAN
CDC7_HUMAN	CSKP_HUMAN
CDC7_HUMAN	DHX35_HUMAN
CDC7_HUMAN	ECHM_HUMAN
CDC7_HUMAN	ENPP1_HUMAN
CDC7_HUMAN	GAK_HUMAN
CDC7_HUMAN	GTF2I_HUMAN
CDC7_HUMAN	HCDH_HUMAN
CDC7_HUMAN	HNRH1_HUMAN
CDC7_HUMAN	HXK4_HUMAN
CDC7_HUMAN	IKKA_HUMAN
CDC7_HUMAN	IKKE_HUMAN
CDC7_HUMAN	IMPA1_HUMAN
CDC7_HUMAN	IRAK1_HUMAN
CDC7_HUMAN	KC1G3_HUMAN
CDC7_HUMAN	KPCD2_HUMAN
CDC7_HUMAN	KPCD_HUMAN
CDC7_HUMAN	KPYM_HUMAN
CDC7_HUMAN	MBL2_HUMAN
CDC7_HUMAN	MD2L1_HUMAN
CDC7_HUMAN	MPIP1_HUMAN
CDC7_HUMAN	NSDHL_HUMAN
CDC7_HUMAN	P3C2G_HUMAN
CDC7_HUMAN	PKD2_HUMAN
CDC7_HUMAN	PLCB1_HUMAN
CDC7_HUMAN	PLCB2_HUMAN
CDC7_HUMAN	PLCD1_HUMAN
CDC7_HUMAN	PLCG1_HUMAN
CDC7_HUMAN	PLCG2_HUMAN
CDC7_HUMAN	PLK1_HUMAN
CDC7_HUMAN	PPB1_HUMAN
CDC7_HUMAN	PRKDC_HUMAN
CDC7_HUMAN	RU2B_HUMAN
CDC7_HUMAN	STAT3_HUMAN
CDC7_HUMAN	STK39_HUMAN
CDC7_HUMAN	TBB4_HUMAN
CDC7_HUMAN	TERT_HUMAN
CDC7_HUMAN	TM9S1_HUMAN
CDC7_HUMAN	TTK_HUMAN
CDC7_HUMAN	UDB17_HUMAN
CDK10_HUMAN	CDK9_HUMAN
CDK10_HUMAN	CHK1_HUMAN
CDK10_HUMAN	CLK2_HUMAN
CDK10_HUMAN	CP39A_HUMAN
CDK10_HUMAN	CP7B1_HUMAN
CDK10_HUMAN	CSKP_HUMAN
CDK10_HUMAN	DHX35_HUMAN
CDK10_HUMAN	ECHA_HUMAN
CDK10_HUMAN	ECHM_HUMAN
CDK10_HUMAN	ECHP_HUMAN
CDK10_HUMAN	GAK_HUMAN
CDK10_HUMAN	GTF2I_HUMAN
CDK10_HUMAN	HCD2_HUMAN
CDK10_HUMAN	HCDH_HUMAN
CDK10_HUMAN	HXK4_HUMAN
CDK10_HUMAN	IKKA_HUMAN
CDK10_HUMAN	IMPA1_HUMAN
CDK10_HUMAN	JPH4_HUMAN
CDK10_HUMAN	KPCD2_HUMAN
CDK10_HUMAN	KPCD_HUMAN
CDK10_HUMAN	MP2K1_HUMAN
CDK10_HUMAN	NSDHL_HUMAN
CDK10_HUMAN	NUP43_HUMAN
CDK10_HUMAN	OCTC_HUMAN
CDK10_HUMAN	ODB2_HUMAN
CDK10_HUMAN	PKD2_HUMAN
CDK10_HUMAN	PLCB2_HUMAN
CDK10_HUMAN	PLCD1_HUMAN
CDK10_HUMAN	PLCG1_HUMAN
CDK10_HUMAN	RAE2_HUMAN
CDK10_HUMAN	RLA1_HUMAN
CDK10_HUMAN	RT28_HUMAN
CDK10_HUMAN	SLBP_HUMAN
CDK10_HUMAN	SSR1_HUMAN
CDK10_HUMAN	STK39_HUMAN
CDK10_HUMAN	THIL_HUMAN
CDK10_HUMAN	TM9S1_HUMAN
CDK10_HUMAN	UDB17_HUMAN
CDK2_HUMAN	CCNH_HUMAN
CDK2_HUMAN	CDK7_HUMAN
CDK2_HUMAN	CDK9_HUMAN
CDK2_HUMAN	CDKL1_HUMAN
CDK2_HUMAN	CHK1_HUMAN
CDK2_HUMAN	CO6_HUMAN
CDK2_HUMAN	CP7B1_HUMAN
CDK2_HUMAN	CSKP_HUMAN
CDK2_HUMAN	DHX35_HUMAN
CDK2_HUMAN	ECHA_HUMAN
CDK2_HUMAN	ECHM_HUMAN
CDK2_HUMAN	ENPP1_HUMAN
CDK2_HUMAN	GAK_HUMAN
CDK2_HUMAN	GTF2I_HUMAN
CDK2_HUMAN	HCD2_HUMAN
CDK2_HUMAN	HCDH_HUMAN
CDK2_HUMAN	HXK4_HUMAN
CDK2_HUMAN	IF4G2_HUMAN
CDK2_HUMAN	JPH4_HUMAN
CDK2_HUMAN	KC1G3_HUMAN
CDK2_HUMAN	KPCD_HUMAN
CDK2_HUMAN	MBL2_HUMAN
CDK2_HUMAN	MK01_HUMAN
CDK2_HUMAN	MK03_HUMAN
CDK2_HUMAN	MP2K1_HUMAN
CDK2_HUMAN	MPIP1_HUMAN
CDK2_HUMAN	MYC_HUMAN
CDK2_HUMAN	NSDHL_HUMAN
CDK2_HUMAN	NUP43_HUMAN
CDK2_HUMAN	OCTC_HUMAN
CDK2_HUMAN	ODB2_HUMAN
CDK2_HUMAN	PABP1_HUMAN
CDK2_HUMAN	PK3CB_HUMAN
CDK2_HUMAN	PLCG1_HUMAN
CDK2_HUMAN	PRKDC_HUMAN
CDK2_HUMAN	RAE2_HUMAN
CDK2_HUMAN	RHOD_HUMAN
CDK2_HUMAN	RS16_HUMAN
CDK2_HUMAN	RS2_HUMAN
CDK2_HUMAN	RT28_HUMAN
CDK2_HUMAN	SF3B1_HUMAN
CDK2_HUMAN	SLBP_HUMAN
CDK2_HUMAN	SRC_HUMAN
CDK2_HUMAN	STAT3_HUMAN
CDK2_HUMAN	STK39_HUMAN
CDK2_HUMAN	TERT_HUMAN
CDK2_HUMAN	THIL_HUMAN
CDK2_HUMAN	TM9S1_HUMAN
CDK2_HUMAN	TTK_HUMAN
CDK2_HUMAN	UBIQ_HUMAN
CDK2_HUMAN	UDB17_HUMAN
CDK7_HUMAN	CCNH_HUMAN
CDK7_HUMAN	CDC2_HUMAN
CDK7_HUMAN	CHK1_HUMAN
CDK7_HUMAN	ELOB_HUMAN
CDK7_HUMAN	HSP7C_HUMAN
CDK7_HUMAN	MPIP1_HUMAN
CDK7_HUMAN	TTK_HUMAN
CDK9_HUMAN	CCNH_HUMAN
CDK9_HUMAN	CDK7_HUMAN
CDK9_HUMAN	CDKL1_HUMAN
CDK9_HUMAN	CHIN_HUMAN
CDK9_HUMAN	CHK1_HUMAN
CDK9_HUMAN	CO6_HUMAN
CDK9_HUMAN	CP7B1_HUMAN
CDK9_HUMAN	CSKP_HUMAN
CDK9_HUMAN	DHX35_HUMAN
CDK9_HUMAN	ECHA_HUMAN
CDK9_HUMAN	ECHM_HUMAN
CDK9_HUMAN	ECHP_HUMAN
CDK9_HUMAN	ELOB_HUMAN
CDK9_HUMAN	ENPP1_HUMAN
CDK9_HUMAN	FRM4B_HUMAN
CDK9_HUMAN	GAK_HUMAN
CDK9_HUMAN	HCD2_HUMAN
CDK9_HUMAN	HCDH_HUMAN
CDK9_HUMAN	HXK4_HUMAN
CDK9_HUMAN	IRAK1_HUMAN
CDK9_HUMAN	JPH4_HUMAN
CDK9_HUMAN	KC1G3_HUMAN
CDK9_HUMAN	KPCD_HUMAN
CDK9_HUMAN	KPYM_HUMAN
CDK9_HUMAN	LYAG_HUMAN
CDK9_HUMAN	MAT1_HUMAN
CDK9_HUMAN	MBL2_HUMAN
CDK9_HUMAN	MP2K1_HUMAN
CDK9_HUMAN	MPIP1_HUMAN
CDK9_HUMAN	NSDHL_HUMAN
CDK9_HUMAN	NUP43_HUMAN
CDK9_HUMAN	OCTC_HUMAN
CDK9_HUMAN	ODB2_HUMAN
CDK9_HUMAN	P3C2G_HUMAN
CDK9_HUMAN	PK3CA_HUMAN
CDK9_HUMAN	PKD2_HUMAN
CDK9_HUMAN	PLCB2_HUMAN
CDK9_HUMAN	PLCD1_HUMAN
CDK9_HUMAN	PLCG1_HUMAN
CDK9_HUMAN	RAE2_HUMAN
CDK9_HUMAN	RHOD_HUMAN
CDK9_HUMAN	RT28_HUMAN
CDK9_HUMAN	SLBP_HUMAN
CDK9_HUMAN	STAT3_HUMAN
CDK9_HUMAN	STK39_HUMAN
CDK9_HUMAN	TBP_HUMAN
CDK9_HUMAN	TF2B_HUMAN
CDK9_HUMAN	THIL_HUMAN
CDK9_HUMAN	TM50B_HUMAN
CDK9_HUMAN	UCP5_HUMAN
CDK9_HUMAN	UDB17_HUMAN
CDKL1_HUMAN	CHK1_HUMAN
CDKL1_HUMAN	CLK2_HUMAN
CDKL1_HUMAN	COPA_HUMAN
CDKL1_HUMAN	CSKP_HUMAN
CDKL1_HUMAN	DHX35_HUMAN
CDKL1_HUMAN	ECHA_HUMAN
CDKL1_HUMAN	ECHM_HUMAN
CDKL1_HUMAN	ECHP_HUMAN
CDKL1_HUMAN	EHMT1_HUMAN
CDKL1_HUMAN	FRM4B_HUMAN
CDKL1_HUMAN	GAK_HUMAN
CDKL1_HUMAN	HCD2_HUMAN
CDKL1_HUMAN	HCDH_HUMAN
CDKL1_HUMAN	HD_HUMAN
CDKL1_HUMAN	HXK4_HUMAN
CDKL1_HUMAN	IKKE_HUMAN
CDKL1_HUMAN	JPH4_HUMAN
CDKL1_HUMAN	KC1G3_HUMAN
CDKL1_HUMAN	KPCD_HUMAN
CDKL1_HUMAN	KPYM_HUMAN
CDKL1_HUMAN	NSDHL_HUMAN
CDKL1_HUMAN	NUP43_HUMAN
CDKL1_HUMAN	OCTC_HUMAN
CDKL1_HUMAN	ODB2_HUMAN
CDKL1_HUMAN	P3C2G_HUMAN
CDKL1_HUMAN	PLCB2_HUMAN
CDKL1_HUMAN	PLCD1_HUMAN
CDKL1_HUMAN	PLCG1_HUMAN
CDKL1_HUMAN	PPB1_HUMAN
CDKL1_HUMAN	RAE2_HUMAN
CDKL1_HUMAN	RT28_HUMAN
CDKL1_HUMAN	SLBP_HUMAN
CDKL1_HUMAN	STK39_HUMAN
CDKL1_HUMAN	TM50B_HUMAN
CDKL1_HUMAN	UDB17_HUMAN
CENPA_HUMAN	AURKB_HUMAN
CENPA_HUMAN	BUB1B_HUMAN
CENPA_HUMAN	BUB1_HUMAN
CENPA_HUMAN	CDC20_HUMAN
CENPA_HUMAN	CENPF_HUMAN
CENPA_HUMAN	CENPR_HUMAN
CENPA_HUMAN	FYN_HUMAN
CENPA_HUMAN	LIS1_HUMAN
CENPA_HUMAN	MARE1_HUMAN
CENPA_HUMAN	MD2L1_HUMAN
CENPA_HUMAN	NUDC_HUMAN
CENPA_HUMAN	NUP43_HUMAN
CENPA_HUMAN	PLK1_HUMAN
CENPA_HUMAN	PP1G_HUMAN
CENPA_HUMAN	RCC2_HUMAN
CENPA_HUMAN	RS27_HUMAN
CENPA_HUMAN	SEC13_HUMAN
CENPA_HUMAN	XPO1_HUMAN
CENPF_HUMAN	AURKB_HUMAN
CENPF_HUMAN	CDC20_HUMAN
CENPF_HUMAN	CENPR_HUMAN
CENPF_HUMAN	MD2L1_HUMAN
CENPF_HUMAN	NUDC_HUMAN
CENPF_HUMAN	PLK1_HUMAN
CENPF_HUMAN	RCC2_HUMAN
CENPF_HUMAN	RS27_HUMAN
CENPF_HUMAN	XPO1_HUMAN
CENPR_HUMAN	NUDC_HUMAN
CENPR_HUMAN	RCC2_HUMAN
CENPR_HUMAN	REN3B_HUMAN
CENPR_HUMAN	RL6_HUMAN
CENPR_HUMAN	XPO1_HUMAN
CHIN_HUMAN	ARHG7_HUMAN
CHIN_HUMAN	CDC42_HUMAN
CHIN_HUMAN	COPA_HUMAN
CHIN_HUMAN	ECHA_HUMAN
CHIN_HUMAN	ECT2_HUMAN
CHIN_HUMAN	ERBB2_HUMAN
CHIN_HUMAN	GAK_HUMAN
CHIN_HUMAN	GDIB_HUMAN
CHIN_HUMAN	NUP43_HUMAN
CHIN_HUMAN	P85A_HUMAN
CHIN_HUMAN	RHG04_HUMAN
CHK1_HUMAN	CP7B1_HUMAN
CHK1_HUMAN	CSKP_HUMAN
CHK1_HUMAN	DHX35_HUMAN
CHK1_HUMAN	ECHA_HUMAN
CHK1_HUMAN	ECHM_HUMAN
CHK1_HUMAN	ENPP1_HUMAN
CHK1_HUMAN	FRM4B_HUMAN
CHK1_HUMAN	GAK_HUMAN
CHK1_HUMAN	HCD2_HUMAN
CHK1_HUMAN	HCDH_HUMAN
CHK1_HUMAN	HS90B_HUMAN
CHK1_HUMAN	HXK4_HUMAN
CHK1_HUMAN	IKKA_HUMAN
CHK1_HUMAN	IMPA1_HUMAN
CHK1_HUMAN	IRAK1_HUMAN
CHK1_HUMAN	JPH4_HUMAN
CHK1_HUMAN	KC1G3_HUMAN
CHK1_HUMAN	KPCD_HUMAN
CHK1_HUMAN	MBL2_HUMAN
CHK1_HUMAN	MP2K1_HUMAN
CHK1_HUMAN	NSDHL_HUMAN
CHK1_HUMAN	NUP43_HUMAN
CHK1_HUMAN	OCTC_HUMAN
CHK1_HUMAN	ODB2_HUMAN
CHK1_HUMAN	P53_HUMAN
CHK1_HUMAN	PAK2_HUMAN
CHK1_HUMAN	PLCB2_HUMAN
CHK1_HUMAN	PLCD1_HUMAN
CHK1_HUMAN	PLCG1_HUMAN
CHK1_HUMAN	PLK1_HUMAN
CHK1_HUMAN	PPB1_HUMAN
CHK1_HUMAN	PRKDC_HUMAN
CHK1_HUMAN	RAE2_HUMAN
CHK1_HUMAN	RT28_HUMAN
CHK1_HUMAN	SLBP_HUMAN
CHK1_HUMAN	SMC3_HUMAN
CHK1_HUMAN	STK39_HUMAN
CHK1_HUMAN	TF65_HUMAN
CHK1_HUMAN	THIL_HUMAN
CHK1_HUMAN	TM50B_HUMAN
CHK1_HUMAN	UCP5_HUMAN
CLK2_HUMAN	DHX35_HUMAN
CLK2_HUMAN	ECHA_HUMAN
CLK2_HUMAN	ECHM_HUMAN
CLK2_HUMAN	EHMT1_HUMAN
CLK2_HUMAN	FRM4B_HUMAN
CLK2_HUMAN	GAK_HUMAN
CLK2_HUMAN	HD_HUMAN
CLK2_HUMAN	HXK4_HUMAN
CLK2_HUMAN	IF4G2_HUMAN
CLK2_HUMAN	IMPA1_HUMAN
CLK2_HUMAN	JPH4_HUMAN
CLK2_HUMAN	KPCD_HUMAN
CLK2_HUMAN	LIS1_HUMAN
CLK2_HUMAN	LYAG_HUMAN
CLK2_HUMAN	MD2L1_HUMAN
CLK2_HUMAN	MP2K1_HUMAN
CLK2_HUMAN	NSDHL_HUMAN
CLK2_HUMAN	NUP43_HUMAN
CLK2_HUMAN	OCTC_HUMAN
CLK2_HUMAN	PAK2_HUMAN
CLK2_HUMAN	PLCD1_HUMAN
CLK2_HUMAN	PLCG1_HUMAN
CLK2_HUMAN	RAE2_HUMAN
CLK2_HUMAN	RASH_HUMAN
CLK2_HUMAN	RT28_HUMAN
CLK2_HUMAN	SFRS1_HUMAN
CLK2_HUMAN	STAT3_HUMAN
CLK2_HUMAN	STK39_HUMAN
CLK2_HUMAN	TM9S1_HUMAN
CLK2_HUMAN	UDB17_HUMAN
CO6_HUMAN	CSKP_HUMAN
CO6_HUMAN	ECHA_HUMAN
CO6_HUMAN	ECHP_HUMAN
CO6_HUMAN	ENPP1_HUMAN
CO6_HUMAN	FRM4B_HUMAN
CO6_HUMAN	FYN_HUMAN
CO6_HUMAN	GAK_HUMAN
CO6_HUMAN	GRB2_HUMAN
CO6_HUMAN	HCD2_HUMAN
CO6_HUMAN	HCDH_HUMAN
CO6_HUMAN	IF4G2_HUMAN
CO6_HUMAN	IMPA1_HUMAN
CO6_HUMAN	MBL2_HUMAN
CO6_HUMAN	MP2K1_HUMAN
CO6_HUMAN	NUP43_HUMAN
CO6_HUMAN	OCTC_HUMAN
CO6_HUMAN	ODB2_HUMAN
CO6_HUMAN	P3C2G_HUMAN
CO6_HUMAN	PAK2_HUMAN
CO6_HUMAN	RT28_HUMAN
CO6_HUMAN	STK39_HUMAN
CO6_HUMAN	TBB4_HUMAN
CO6_HUMAN	UCP5_HUMAN
COLI_HUMAN	ADCY1_HUMAN
COLI_HUMAN	ADCY5_HUMAN
COLI_HUMAN	ARHG1_HUMAN
COLI_HUMAN	CCL20_HUMAN
COLI_HUMAN	CCL21_HUMAN
COLI_HUMAN	CCL5_HUMAN
COLI_HUMAN	CP7B1_HUMAN
COLI_HUMAN	ENPP1_HUMAN
COLI_HUMAN	GAK_HUMAN
COLI_HUMAN	GBB1_HUMAN
COLI_HUMAN	GBG2_HUMAN
COLI_HUMAN	GNA12_HUMAN
COLI_HUMAN	GNAI1_HUMAN
COLI_HUMAN	GNAI2_HUMAN
COLI_HUMAN	GNAI3_HUMAN
COLI_HUMAN	GNAZ_HUMAN
COLI_HUMAN	GROA_HUMAN
COLI_HUMAN	HCD2_HUMAN
COLI_HUMAN	IL8_HUMAN
COLI_HUMAN	KC1G3_HUMAN
COLI_HUMAN	KNG1_HUMAN
COLI_HUMAN	KPCD_HUMAN
COLI_HUMAN	P2Y12_HUMAN
COLI_HUMAN	PK3CG_HUMAN
COLI_HUMAN	PLCB1_HUMAN
COLI_HUMAN	PLCB2_HUMAN
COLI_HUMAN	PLCD1_HUMAN
COLI_HUMAN	SDF1_HUMAN
COLI_HUMAN	SSR1_HUMAN
COLI_HUMAN	SSR2_HUMAN
COLI_HUMAN	SSR3_HUMAN
COLI_HUMAN	SSR5_HUMAN
COLI_HUMAN	TM50B_HUMAN
COPA_HUMAN	ECHA_HUMAN
COPA_HUMAN	ECHB_HUMAN
COPA_HUMAN	ECHP_HUMAN
COPA_HUMAN	HCDH_HUMAN
COPA_HUMAN	IMPA1_HUMAN
COPA_HUMAN	IRAK1_HUMAN
COPA_HUMAN	LIS1_HUMAN
COPA_HUMAN	MP2K1_HUMAN
COPA_HUMAN	NSDHL_HUMAN
COPA_HUMAN	OCTC_HUMAN
COPA_HUMAN	ODB2_HUMAN
COPA_HUMAN	P3C2G_HUMAN
COPA_HUMAN	PK3CA_HUMAN
COPA_HUMAN	PKD2_HUMAN
COPA_HUMAN	PLCD1_HUMAN
COPA_HUMAN	PPB1_HUMAN
COPA_HUMAN	RL4_HUMAN
COPA_HUMAN	SMC3_HUMAN
COPA_HUMAN	TM50B_HUMAN
COPA_HUMAN	UCP5_HUMAN
COX5A_HUMAN	CSKP_HUMAN
COX5A_HUMAN	CYC_HUMAN
COX5A_HUMAN	ODB2_HUMAN
COX5A_HUMAN	RAE2_HUMAN
COX5A_HUMAN	RL12_HUMAN
CP39A_HUMAN	DLG4_HUMAN
CP39A_HUMAN	ECHP_HUMAN
CP39A_HUMAN	ENPP1_HUMAN
CP39A_HUMAN	FRM4B_HUMAN
CP39A_HUMAN	GAK_HUMAN
CP39A_HUMAN	HCD2_HUMAN
CP39A_HUMAN	HCDH_HUMAN
CP39A_HUMAN	HD_HUMAN
CP39A_HUMAN	IF4G2_HUMAN
CP39A_HUMAN	JPH4_HUMAN
CP39A_HUMAN	NSDHL_HUMAN
CP39A_HUMAN	OCTC_HUMAN
CP39A_HUMAN	ODB2_HUMAN
CP39A_HUMAN	PLCD1_HUMAN
CP39A_HUMAN	PPB1_HUMAN
CP39A_HUMAN	RAE2_HUMAN
CP39A_HUMAN	RU2B_HUMAN
CP39A_HUMAN	SLBP_HUMAN
CP39A_HUMAN	STK39_HUMAN
CP39A_HUMAN	THIL_HUMAN
CP39A_HUMAN	TLR9_HUMAN
CP39A_HUMAN	TM50B_HUMAN
CP39A_HUMAN	UDB17_HUMAN
CP7B1_HUMAN	CSKP_HUMAN
CP7B1_HUMAN	ECHA_HUMAN
CP7B1_HUMAN	ECHM_HUMAN
CP7B1_HUMAN	ECHP_HUMAN
CP7B1_HUMAN	ENPP1_HUMAN
CP7B1_HUMAN	FRM4B_HUMAN
CP7B1_HUMAN	GAK_HUMAN
CP7B1_HUMAN	GTF2I_HUMAN
CP7B1_HUMAN	HCD2_HUMAN
CP7B1_HUMAN	HCDH_HUMAN
CP7B1_HUMAN	HNRH1_HUMAN
CP7B1_HUMAN	HXK4_HUMAN
CP7B1_HUMAN	IKKE_HUMAN
CP7B1_HUMAN	JPH4_HUMAN
CP7B1_HUMAN	KC1G3_HUMAN
CP7B1_HUMAN	MBL2_HUMAN
CP7B1_HUMAN	MPIP1_HUMAN
CP7B1_HUMAN	NSDHL_HUMAN
CP7B1_HUMAN	NUP43_HUMAN
CP7B1_HUMAN	OCTC_HUMAN
CP7B1_HUMAN	ODB2_HUMAN
CP7B1_HUMAN	P3C2G_HUMAN
CP7B1_HUMAN	PLCB2_HUMAN
CP7B1_HUMAN	PLCD1_HUMAN
CP7B1_HUMAN	PLCG1_HUMAN
CP7B1_HUMAN	PPB1_HUMAN
CP7B1_HUMAN	RAE2_HUMAN
CP7B1_HUMAN	RT28_HUMAN
CP7B1_HUMAN	SF3B1_HUMAN
CP7B1_HUMAN	SLBP_HUMAN
CP7B1_HUMAN	STK39_HUMAN
CP7B1_HUMAN	THIL_HUMAN
CP7B1_HUMAN	UDB17_HUMAN
CPSF2_HUMAN	GNAZ_HUMAN
CPSF2_HUMAN	NUCL_HUMAN
CPSF2_HUMAN	PAPOA_HUMAN
CPSF2_HUMAN	REN3B_HUMAN
CPSF2_HUMAN	SFRS1_HUMAN
CPSF2_HUMAN	SFRS5_HUMAN
CRCM_HUMAN	2AAA_HUMAN
CRCM_HUMAN	CYC_HUMAN
CRCM_HUMAN	ECHM_HUMAN
CRCM_HUMAN	EF1D_HUMAN
CRCM_HUMAN	EI2BA_HUMAN
CRCM_HUMAN	EIF3H_HUMAN
CRCM_HUMAN	EIF3I_HUMAN
CRCM_HUMAN	GBB1_HUMAN
CRCM_HUMAN	GRB2_HUMAN
CRCM_HUMAN	IF4G1_HUMAN
CRCM_HUMAN	MARE1_HUMAN
CRCM_HUMAN	P53_HUMAN
CRCM_HUMAN	RHOC_HUMAN
CRCM_HUMAN	RL23A_HUMAN
CRCM_HUMAN	RU2B_HUMAN
CRCM_HUMAN	SEC13_HUMAN
CRCM_HUMAN	SMC3_HUMAN
CRCM_HUMAN	THIL_HUMAN
CSKP_HUMAN	ARHG7_HUMAN
CSKP_HUMAN	DHX35_HUMAN
CSKP_HUMAN	DLG4_HUMAN
CSKP_HUMAN	ECHA_HUMAN
CSKP_HUMAN	ECHM_HUMAN
CSKP_HUMAN	ECHP_HUMAN
CSKP_HUMAN	EHMT1_HUMAN
CSKP_HUMAN	ENPP1_HUMAN
CSKP_HUMAN	GAK_HUMAN
CSKP_HUMAN	GTF2I_HUMAN
CSKP_HUMAN	HCD2_HUMAN
CSKP_HUMAN	HCDH_HUMAN
CSKP_HUMAN	HXK4_HUMAN
CSKP_HUMAN	IRAK1_HUMAN
CSKP_HUMAN	JPH4_HUMAN
CSKP_HUMAN	KC1G3_HUMAN
CSKP_HUMAN	KPYM_HUMAN
CSKP_HUMAN	MP2K1_HUMAN
CSKP_HUMAN	MPIP1_HUMAN
CSKP_HUMAN	NFYA_HUMAN
CSKP_HUMAN	NSDHL_HUMAN
CSKP_HUMAN	NUP43_HUMAN
CSKP_HUMAN	OCTC_HUMAN
CSKP_HUMAN	ODB2_HUMAN
CSKP_HUMAN	PKD2_HUMAN
CSKP_HUMAN	PLCB1_HUMAN
CSKP_HUMAN	PLCB2_HUMAN
CSKP_HUMAN	PLCD1_HUMAN
CSKP_HUMAN	PLCG1_HUMAN
CSKP_HUMAN	PLCG2_HUMAN
CSKP_HUMAN	RT28_HUMAN
CSKP_HUMAN	SMC3_HUMAN
CSKP_HUMAN	SSR3_HUMAN
CSKP_HUMAN	STK39_HUMAN
CSKP_HUMAN	THIL_HUMAN
CSKP_HUMAN	TM50B_HUMAN
CSKP_HUMAN	TTK_HUMAN
CSKP_HUMAN	UDB17_HUMAN
CXCR4_HUMAN	ADCY1_HUMAN
CXCR4_HUMAN	ADCY5_HUMAN
CXCR4_HUMAN	ARHG1_HUMAN
CXCR4_HUMAN	CCL20_HUMAN
CXCR4_HUMAN	CCL21_HUMAN
CXCR4_HUMAN	CCL5_HUMAN
CXCR4_HUMAN	CCR1_HUMAN
CXCR4_HUMAN	CCR2_HUMAN
CXCR4_HUMAN	CCR5_HUMAN
CXCR4_HUMAN	CCR6_HUMAN
CXCR4_HUMAN	COLI_HUMAN
CYC_HUMAN	CASP3_HUMAN
CYC_HUMAN	HSP7C_HUMAN
CYC_HUMAN	PAK2_HUMAN
DGKE_HUMAN	EHMT1_HUMAN
DGKE_HUMAN	GBG2_HUMAN
DGKE_HUMAN	KPCD_HUMAN
DGKE_HUMAN	MP2K1_HUMAN
DGKE_HUMAN	NUDC_HUMAN
DGKE_HUMAN	PAK2_HUMAN
DGKE_HUMAN	PLCB1_HUMAN
DGKE_HUMAN	PLCB2_HUMAN
DGKE_HUMAN	PLCD1_HUMAN
DGKE_HUMAN	PLCG1_HUMAN
DGKE_HUMAN	PLCG2_HUMAN
DGKE_HUMAN	RT28_HUMAN
DGKE_HUMAN	UCP5_HUMAN
DHX35_HUMAN	ECHA_HUMAN
DHX35_HUMAN	ECHB_HUMAN
DHX35_HUMAN	ECHM_HUMAN
DHX35_HUMAN	ECHP_HUMAN
DHX35_HUMAN	EF2_HUMAN
DHX35_HUMAN	ENPP1_HUMAN
DHX35_HUMAN	HCD2_HUMAN
DHX35_HUMAN	HCDH_HUMAN
DHX35_HUMAN	HD_HUMAN
DHX35_HUMAN	HS90B_HUMAN
DHX35_HUMAN	HXK4_HUMAN
DHX35_HUMAN	KC1G3_HUMAN
DHX35_HUMAN	KPYM_HUMAN
DHX35_HUMAN	MPIP1_HUMAN
DHX35_HUMAN	NSDHL_HUMAN
DHX35_HUMAN	NUP43_HUMAN
DHX35_HUMAN	OCTC_HUMAN
DHX35_HUMAN	ODB2_HUMAN
DHX35_HUMAN	PKD2_HUMAN
DHX35_HUMAN	PLCD1_HUMAN
DHX35_HUMAN	PLCG1_HUMAN
DHX35_HUMAN	RL27_HUMAN
DHX35_HUMAN	RL3_HUMAN
DHX35_HUMAN	RT28_HUMAN
DHX35_HUMAN	SF3B1_HUMAN
DHX35_HUMAN	SLBP_HUMAN
DHX35_HUMAN	STAT3_HUMAN
DHX35_HUMAN	STK39_HUMAN
DHX35_HUMAN	THIL_HUMAN
DHX35_HUMAN	TM50B_HUMAN
DHX35_HUMAN	TM9S1_HUMAN
DHX35_HUMAN	UCP5_HUMAN
DHX35_HUMAN	UDB17_HUMAN
DHX9_HUMAN	CPSF2_HUMAN
DHX9_HUMAN	FUS_HUMAN
DHX9_HUMAN	HNRH1_HUMAN
DHX9_HUMAN	HNRPC_HUMAN
DHX9_HUMAN	HNRPD_HUMAN
DHX9_HUMAN	HNRPF_HUMAN
DHX9_HUMAN	HNRPG_HUMAN
DHX9_HUMAN	HNRPK_HUMAN
DHX9_HUMAN	HNRPL_HUMAN
DHX9_HUMAN	HNRPM_HUMAN
DHX9_HUMAN	HNRPR_HUMAN
DHX9_HUMAN	HNRPU_HUMAN
DHX9_HUMAN	LSM2_HUMAN
DHX9_HUMAN	NH2L1_HUMAN
DHX9_HUMAN	PAPOA_HUMAN
DHX9_HUMAN	PCBP1_HUMAN
DHX9_HUMAN	PRP4_HUMAN
DHX9_HUMAN	PTBP1_HUMAN
DHX9_HUMAN	REN3B_HUMAN
DHX9_HUMAN	ROA1_HUMAN
DHX9_HUMAN	ROA2_HUMAN
DHX9_HUMAN	RPAB4_HUMAN
DHX9_HUMAN	RPB11_HUMAN
DHX9_HUMAN	RPB3_HUMAN
DHX9_HUMAN	RSMB_HUMAN
DHX9_HUMAN	RU2A_HUMAN
[truncated: 5,208 more rows]
