# Supplementary material for: Identification of AKT kinases as unfavorable prognostic factors for hepatocellular carcinoma by a combination of expression profile, interaction network analysis and clinical validation
Source: Royal Society of Chemistry journal article supplement (doi:10.1039/c3mb70400a), 2013-10-14
Supplement: c3mb70400a_4.xlsx [file c3mb70400a_4.xlsx]

## Sheet: HCC markers_molecular function
Group leading term	Group HCC significant genes
aldehyde dehydrogenase (NAD) activity	ALDH3A2|ALDH7A1
protein serine/threonine kinase activity	ACADVL|ACTB|AKT1|AKT2|AKT3|ARF6|ARHGEF7|ATP5A1|ATP5D|ATP5F1|ATP5J2|ATP7A|AURKB|BUB1|BUB1B|CASK|CCNH|CDC2|CDC42|CDC7|CDK10|CDK2|CDK7|CDK9|CDKL1|CHEK1|CHUK|CSNK1G3|DGKE|DHX35|DHX9|DYNC1H1|EEF1A1|EEF2|EFTUD2|EGFR|EIF4A1|EIF4A2|EIF5|EIF5B|ENPP1|ERBB2|ERCC2|FYN|GAK|GNA12|GNAI1|GNAI2|GNAI3|GNAZ|GNB1|HNRNPU|HRAS|HSP90AA1|HSP90AB1|HSPA5|HSPA8|IKBKB|IKBKE|IRAK1|MAP2K1|MAP3K1|MAPK1|MAPK3|NEK2|NME1-NME2|PAP…
pyrophosphatase activity	ARF6|ATP5A1|ATP5D|ATP5F1|ATP5J2|ATP7A|CDC42|COX5A|DHX35|DHX9|DYNC1H1|EEF1A1|EEF2|EFTUD2|EIF4A1|EIF4A2|EIF5|EIF5B|ENPP1|ERCC2|GNA12|GNAI1|GNAI2|GNAI3|GNAZ|GNB1|HRAS|HSPA8|MBL2|RAC1|RHOA|RHOC|RHOD|SMC3|TUBA1A|TUBA4A|TUBB2C|TUBB4|TUBG1
protein heterodimerization activity	ADRB2|AGTR1|AKT1|B4GALT1|BDKRB2|BIRC5|CDK2|CENPF|CHUK|EGFR|ENPP1|ERBB2|FYN|HNRNPC|HSP90AA1|IKBKB|IRAK1|NFKBIA|PAFAH1B1|POLR2C|POLR2J|PPP2R1A|RELA|SMC3|STK39|TP53
NF-kappaB binding	ACTB|BDKRB2|IRAK1|LSM2|NFKBIA|PAFAH1B1|PIK3R1|PRKCD|RAC1|RELA|RPS3|SSR2|TP53|YWHAE|YWHAG
DNA helicase activity	ATP5A1|ATP5D|ATP5F1|ATP5J2|ATP7A|DHX35|DHX9|DYNC1H1|EIF4A1|EIF4A2|ERCC2|HSPA8|SMC3
diacylglycerol binding	CHN1|DGKE|PRKAA1|PRKCA|PRKCD|PRKD2|RAF1
receptor signaling protein activity	EGFR|ERBB2|GNAZ|IKBKE|IRAK1|MAP3K1|MAPK1|MAPK3|PLCG1|RAF1|STAT3|STK39
IkappaB kinase activity	CHUK|EGFR|IKBKB|IKBKE|IRAK1|MAP3K1|MAPK1|MAPK3|STK39
receptor signaling protein serine/threonine kinase activity	EGFR|IKBKE|IRAK1|MAP3K1|MAPK1|MAPK3|PAFAH1B1|STK39
receptor signaling protein serine/threonine kinase activity	EGFR|ERBB2|IKBKE|IRAK1|MAP2K1|MAP3K1|MAPK1|MAPK3|STK39|TP53|YBX1
G-protein-coupled receptor binding	AGTR1|BDKRB2|BIRC5|CCL20|CCL21|CCL5|CCR6|CENPF|CXCL1|CXCL12|CXCR4|EGFR|ERBB2|IL8|PPP2R1A|SMC3|TP53
dynein binding	ADRB2|AGTR1|B4GALT1|BDKRB2|BIRC5|CENPF|EGFR|ENPP1|ERBB2|FYN|HNRNPA1|HNRNPA2B1|HSP90AA1|IKBKB|IRAK1|MAP2K1|MAP3K1|PAFAH1B1|PCBP1|PIK3R1|POLR2C|POLR2J|PPP2R1A|SMC3|SRC|TP53|TTK|YBX1
SH3/SH2 adaptor activity	ARFGEF1|ARHGAP4|ARHGEF1|ARHGEF7|CHN1|ECT2|EIF2B1|GRB2|HSPA5|SOS1|SRC
translation factor activity, nucleic acid binding	EEF1A1|EEF1D|EEF1G|EEF2|EIF1AY|EIF2B1|EIF2S1|EIF3E|EIF3H|EIF3I|EIF4A1|EIF4A2|EIF4B|EIF4E|EIF4G1|EIF4G2|EIF5|EIF5B|GTF2B|PABPC1
cyclin-dependent protein kinase activity	CDC2|CDK10|CDK2|CDK7|CDK9|CDKL1|LSM2
G-protein-coupled receptor binding	AGTR1|BDKRB2|CCL20|CCL21|CCL5|CXCL1|CXCL12|IL8
3-hydroxyacyl-CoA dehydrogenase activity	ADH1A|ADH1C|ADH6|ECHS1|EHHADH|HADH|HADHA|HADHB|HSD17B10|NSDHL|RHOC|RPS3
oxysterol 7-alpha-hydroxylase activity	CYP39A1|CYP7B1
somatostatin receptor activity	AGTR1|ARFGEF1|BDKRB2|C5AR1|CCR1|CCR5|CCR6|CXCR4|SSTR1|SSTR2|SSTR3|SSTR5
DNA-directed RNA polymerase activity	PAPOLA|POLR2C|POLR2J|POLR2K|TERT
inositol or phosphatidylinositol phosphodiesterase activity	ALPP|BDKRB2|CCR5|CDC25A|CYCS|ENPP1|IMPA1|NT5C2|PLCB2|PLCD1|PLCG1|PLCG2|PPP1CC
dynein binding	AGTR1|B4GALT1|BDKRB2|BIRC5|CENPF|EGFR|ERBB2|HSPA5|KNG1|MAPK1|MAPK3|MAPRE1|PAFAH1B1|PPP2R1A|RPL22|RPL29|RPSA|SMC3|TP53|YBX1
insulin receptor substrate binding	CASP3|EGFR|ENPP1|ERBB2|FYN|GRB2|INS|PIK3CA|PIK3CB|PIK3CG|PIK3R1|PIK3R2|SRC|YWHAG
adenosine receptor activity, G-protein coupled	ADORA3|P2RY12
1-phosphatidylinositol-3-kinase activity	GRB2|PIK3C2G|PIK3CA|PIK3CB|PIK3CG|PIK3R1|PIK3R2

## Sheet: HCC_markers biological process
Group leading term	Group HCC significant genes
lipopolysaccharide-mediated signaling pathway	ADRB2|AKT1|ATP7A|BIRC5|CASP3|CHEK1|CYCS|DYNLL1|EGFR|EIF2B1|ENPP1|GAA|GRB2|HNRNPA1|HRAS|HSPA5|IKBKB|INS|IRAK1|MAP3K1|MAPK1|NFKBIA|NSDHL|PIK3R1|PLCD1|PPP1CC|PPP2R1A|PRKCA|PRKDC|RHOA|RPL23|RPS3|SSR2|TP53|XPO1|YWHAB|YWHAE|YWHAG
cellular protein metabolic process	ADRB2|AKT1|AKT2|AKT3|ARHGEF7|ATP5A1|ATP5D|ATP5F1|ATP7A|AURKB|B4GALT1|BUB1|BUB1B|BUB3|C5AR1|C6|CASK|CASP3|CDC2|CDC20|CDC25A|CDC42|CDC7|CDK10|CDK2|CDK7|CDK9|CDKL1|CHEK1|CHUK|COPA|CSNK1G3|CXCR4|DGKE|DYNC1H1|EEF1A1|EEF1D|EEF1G|EEF2|EGFR|EHMT1|EIF1AY|EIF2B1|EIF3E|EIF3H|EIF3I|EIF4A1|EIF4A2|EIF4B|EIF4E|EIF5B|ENPP1|ERBB2|FYN|GAK|GNA12|GRB2|GTF2B|HSP90AA1|HSP90AB1|HSPA8|IKBKB|IKBKE|IMPA1|INS|IRAK1|MAD2L1|…
chemotaxis	ACTB|ADORA3|ADRB2|AGTR1|AKT1|ARF6|ATP7A|B4GALT1|BDKRB2|C5AR1|C6|CCL20|CCL21|CCL5|CCR1|CCR5|CCR6|CXCL1|CXCL12|CXCR4|EGFR|ENPP1|ERBB2|GAA|HRAS|IL8|INS|KNG1|MAP2K1|MAP3K1|MAPK1|MBL2|NCL|NFKB1|NFKBIA|PAFAH1B1|PIK3CB|PIK3R1|PKD2|PLCD1|PRKCA|RAC1|RELA|RHOA|RPLP0|RPS19|RPS27A|SOS1|SSTR5|STAT3|TLR9|TUBB2C
regulation of MAP kinase activity	ADRB2|AGTR1|AKT1|ARF6|ATP7A|B4GALT1|BDKRB2|C5AR1|CCL5|CDC42|CDC7|CXCL12|CXCR4|DGKE|EGFR|ENPP1|ERBB2|GRB2|IL8|INS|IRAK1|MAP3K1|MAPRE1|NCL|NFKBIA|PAFAH1B1|PIK3CB|PIK3R1|PLCD1|PPP2R1A|PRKAA1|PRKCA|PRKCD|PRKDC|RAC1|RAF1|RELA|RHOA|RPS19|RPS27A|SOS1|SRC|SSTR5|TLR9
motor axon guidance	AGTR1|AKT1|ATP7A|B4GALT1|C5AR1|CXCL12|CXCR4|EGFR|ERBB2|GRB2|IL8|INS|KNG1|MAP3K1|NFKBIA|PIK3CB|PIK3R1|PLCB2|PPP2R1A|PRKCA|PRKCD|PRKDC|RAC1|RPS19|SOS1
protein polymerization	ADRB2|BUB1B|CENPF|DYNC1H1|IRAK1|MNAT1|PAFAH1B1|PPP2R1A|RAC1|SMC3|SRC|TCEB2|TP53|TTK|TUBA1A|TUBA4A|TUBB2C|TUBB4|TUBG1|XPO1
motor axon guidance	ADRB2|AKT1|ALDH3A2|ARSA|B4GALT1|C6|CASP3|CXCL12|CXCR4|EGFR|ENPP1|ERBB2|GAA|GNA12|IL8|INS|IRAK1|MAP3K1|MBL2|NME1-NME2|P2RY12|PIK3CB|PRKCA|RPLP0|RPN1|RPN2|RPS27A
cellular ion homeostasis	ACTB|AGTR1|AKT1|ARF6|ATP7A|B4GALT1|BDKRB2|C5AR1|CCL5|CCR1|CCR5|CCR6|CDC7|CXCL12|CXCR4|EGFR|ENPP1|ERBB2|IL8|INS|KNG1|MAP2K1|MAP3K1|MAPRE1|NCL|PAFAH1B1|PIK3CB|PIK3R1|PKD2|PLCD1|PRKCA|PRKCD|PRKDC|RAC1|RELA|RPLP0|RPS27A|SOS1|STAT3|TLR9|TUBB2C
regulation of catalytic activity	ADORA3|ADRB2|AGTR1|AKT1|ARF6|ATP7A|B4GALT1|BIRC5|BUB1B|BUB3|C5AR1|C6|CASP3|CCNH|CDC2|CDC20|CDC25A|CDC42|CDC7|CDK2|CDK7|CHEK1|CHML|CHUK|CXCL12|CXCR4|CYCS|DGKE|DYNLL1|ECT2|EEF1D|EGFR|ENPP1|ERBB2|ERCC2|FYN|GDI2|GNA12|GNAI2|GNAI3|GRB2|GTF2H4|HRAS|HSP90AA1|HSP90AB1|HSPA5|HTR2B|IKBKE|IL8|INS|IRAK1|KNG1|MAD2L1|MAP3K1|MAPK1|MBL2|MNAT1|NCBP1|NFKB1|NFKBIA|NME1-NME2|PAFAH1B1|PIK3CB|PIK3R1|PKD2|PLCB2|PLK1|PP…
homeostasis of number of cells	AKT1|CALM1|CASP3|CYCS|ERBB2|ERCC2|IKBKB|INS|IRAK1|MAP2K1|MAP3K1|PPP2R1A|PRKCA|RELA|RPS17|RPS19|RPS24|RPS3|SSTR3|TP53|YWHAG
regulation of MAP kinase activity	ADCY1|ADRB2|AGTR1|AKT1|ARF6|ATP5D|ATP7A|C5AR1|CASP3|CXCL12|CXCR4|DYNLL1|EGFR|EIF2B1|ENPP1|ERBB2|GAA|GNB1|GNG2|GRB2|IL8|INS|MAP3K1|MAPRE1|NFKBIA|PIK3CB|PIK3R1|PPP2R1A|PRKAA1|PRKCA|RAC1|SOS1|TP53|YWHAG
regulation of insulin receptor signaling pathway	ADCY1|ADORA3|ADRB2|AGTR1|AKT1|ARF6|ATP5D|ATP7A|B4GALT1|CASP3|CXCL12|DYNLL1|EGFR|EIF2B1|ENPP1|ERCC2|GAA|GNB1|GNG2|IL8|INS|MAPK1|MAPRE1|NFKBIA|PPP2R1A|PRKCA|RAC1|RPS3|SSTR3|TP53|TUBB2C|YWHAG
cell cycle checkpoint	ADRB2|AKT1|ATP5D|ATP7A|BIRC5|BUB1|BUB1B|BUB3|CASP3|CDK2|CENPF|CHEK1|CYCS|EIF4G2|ENPP1|ERCC2|HRAS|HSP90AA1|HSPA5|IL8|INS|MAD2L1|MAP3K1|NEK2|NFKBIA|PKD2|PPP2R1A|PRKCA|PRKDC|RELA|RHOA|RPS3|SLC25A14|SMC3|TP53|TTK|TUBG1
regulation of insulin receptor signaling pathway	ADCY1|ADORA3|ADRB2|AGTR1|AKT1|ATP7A|B4GALT1|BDKRB2|CASP3|CXCL12|DGKE|DYNLL1|EGFR|EIF2B1|ENPP1|GAA|GNAI2|GNB1|GNG2|IL8|INS|IRAK1|KNG1|P2RY12|POMC|PPP2R1A|PRKCA|SSTR2|SSTR3|TP53|YWHAG
mitosis	AURKB|BIRC5|BUB1|BUB1B|BUB3|CASP3|CDC2|CDC20|CDC25A|CDC42|CDC7|CDK10|CDK2|CDK7|CENPF|CHEK1|COPA|DYNC1H1|EGFR|ERCC2|MAD2L1|MAPRE1|MCC|MNAT1|NEK2|NME1-NME2|NUDC|PAFAH1B1|PINX1|PLK1|RCC2|RPS27A|SMC3|SOS1|TP53|TTK|TUBG1
apoptotic mitochondrial changes	ADRB2|AKT1|ATP5D|ATP7A|BIRC5|BUB1B|CASP3|CDK2|CHEK1|CYCS|DYNLL1|EGFR|EIF4G2|ENPP1|ERBB2|ERCC2|HRAS|HSP90AA1|HSPA5|IKBKB|IL8|INS|MAP2K1|MAP3K1|MAPK1|MCC|NFKBIA|NME1-NME2|PINX1|PKD2|PPP2R1A|PRKCA|PRKDC|RELA|RHOA|RPS3|SLC25A14|SSTR3|TP53|TUBB2C|YWHAB|YWHAG
negative regulation of catalytic activity	ADORA3|ADRB2|ATP7A|BIRC5|BUB1B|BUB3|CASP3|CCR1|CDC20|CYCS|GNAI2|GNAI3|HSPA5|INS|MAD2L1|P2RY12|PPP2R1A|PRKCA|RPS19|RPS27A|RPS3|SSTR1|SSTR2|SSTR3|SSTR5|TP53|YWHAG
cellular calcium ion homeostasis	ADRB2|AGTR1|AKT1|ARF6|ATP7A|B4GALT1|BDKRB2|C5AR1|C6|CCL5|CCR1|CCR5|CCR6|CXCL12|CXCR4|EGFR|ENPP1|ERBB2|FYN|GAA|HTR2B|IL8|INS|KNG1|MAP3K1|MAPRE1|MBL2|NCL|NFKBIA|PIK3CB|PIK3R1|PKD2|PLCD1|POMC|PPP2R1A|PRKCA|PRKCD|PRKDC|RAC1|RHOA|RPLP0|RPS19|RPS3|RPS6|SSTR5
cellular calcium ion homeostasis	ADRB2|AGTR1|AKT1|ATP7A|B4GALT1|BDKRB2|C5AR1|C6|CCL5|CCR1|CCR5|CCR6|CXCL12|CXCR4|EGFR|ENPP1|FYN|GAA|HTR2B|IL8|INS|KNG1|MAP3K1|MBL2|NCL|PAFAH1B1|PIK3CB|PIK3R1|PKD2|PLCD1|POMC|PPP2R1A|PRKCA|PRKCD|PRKDC|RPS3
positive regulation of kinase activity	ADORA3|ADRB2|AGTR1|AKT1|B4GALT1|C5AR1|CALM1|CDC42|CXCR4|DGKE|EGFR|EIF2B1|ENPP1|ERBB2|IKBKB|IRAK1|KNG1|MAP3K1|MAPK1|NFKBIA|PIK3CB|POMC|PRKAA1|PRKCA|RAC1|RELA|RPS3|SOS1
telomere maintenance	ADRB2|AKT1|ATP7A|GAA|PIK3R1|PINX1|PRKDC|TERT|TP53
positive regulation of actin filament polymerization	ARF6|ARFGEF1|ARHGAP4|ARHGEF1|ARHGEF7|CDC42|CXCL12|ECT2|HRAS|KNG1|MAP3K1|MAPRE1|PAFAH1B1|PIK3R1|RAC1|RAF1|SOS1
lipopolysaccharide-mediated signaling pathway	ADRB2|AKT1|CALM1|CCL20|CCL5|CHUK|CXCL12|CXCR4|DGKE|ENPP1|GAA|IKBKB|INS|IRAK1|MAP3K1|MAPK1|NFKBIA|PIK3R1|RELA|RHOA|RPS3|TLR9|TP53
RNA metabolic process	ADRB2|ATP7A|CASP3|CCNH|CDK7|CDK9|CENPA|CENPF|CPSF2|CYCS|DHX35|DHX9|EFTUD2|EIF1AY|EIF2B1|EIF4E|EIF4G1|EIF4G2|ERCC2|FUS|GTF2B|GTF2H4|GTF2I|HNRNPA1|HNRNPA2B1|HNRNPC|HNRNPD|HNRNPF|HNRNPH1|HNRNPK|HNRNPL|HNRNPM|HNRNPR|HNRNPU|IRAK1|LSM2|MNAT1|NCBP1|NFKB1|NFYA|NHP2L1|PABPC1|PAPOLA|PCBP1|POLR2C|POLR2J|POLR2K|PPP2R1A|PRPF4|PTBP1|RAC1|RBMX|RPS17|RPS24|RPS3|RPS5|SF3A1|SF3A2|SF3B1|SF3B4|SFRS5|SLBP|SNRPA|SNRPA…
positive regulation of oxidoreductase activity	AGTR1|AKT1|ATP7A|B4GALT1|C6|CASP3|CCR6|CDK2|CXCL12|EGFR|ENPP1|ERBB2|FYN|IL8|INS|KNG1|MBL2|NFKBIA|PPP2R1A|PRKAA1|PRKCA|PRKCD|RAC1|RHOA|RPS3|RPS6|SSTR5|TP53|TUBB2C
lipid modification	ACADVL|CROT|CYP39A1|CYP7B1|ECHS1|EHHADH|HADH|HADHA|HADHB|PAFAH1B1|PIK3C2G|PIK3CA|PIK3CB|PIK3CG|PIK3R1|PLCB2|PLCD1|PLCG1|PLCG2|PRKAA1
positive regulation of oxidoreductase activity	ADRB2|AGTR1|AKT1|ATP7A|B4GALT1|CASP3|CDC7|CXCL12|CXCR4|DYNLL1|EGFR|EIF2B1|ERBB2|GAA|GRB2|IKBKB|IL8|INS|IRAK1|MAP3K1|NCL|NFKBIA|NSDHL|PIK3R1|PLCD1|PPP1CC|PRKDC|TP53|YWHAB
regulation of cellular protein metabolic process	ACTB|ADRB2|AGTR1|AKT1|ARF6|ATP7A|B4GALT1|BDKRB2|BIRC5|C5AR1|C6|CASP3|CCL5|CCNH|CCR1|CCR5|CCR6|CDC42|CDC7|CDK2|CDK7|CXCL12|CXCR4|DYNLL1|ECT2|EEF1D|EGFR|EIF2S1|EIF3E|EIF3H|EIF3I|EIF4A2|EIF4B|EIF4E|EIF4G1|EIF4G2|EIF5|EIF5B|ENPP1|ERBB2|ERCC2|FYN|GAA|HRAS|HSP90AA1|HSP90AB1|HTR2B|IKBKB|IKBKE|IL8|INS|IRAK1|KNG1|MAP2K1|MAP3K1|MAPK1|MAPRE1|MBL2|MNAT1|NCBP1|NFKB1|NFKBIA|NME1-NME2|PAFAH1B1|PIK3CB|PIK3R1|PIN…
regulation of cellular component organization	ADRB2|AGTR1|ARF6|ARHGAP4|ATP7A|B4GALT1|CDC42|CXCL12|CXCR4|EGFR|EIF2S1|EIF3E|EIF3H|EIF3I|EIF4A2|EIF4B|EIF4G1|EIF4G2|EIF5|EIF5B|ENPP1|ERBB2|GNA12|HRAS|IL8|INS|MAP3K1|MAPRE1|NFKBIA|PAFAH1B1|PIK3R1|PRKCA|RAC1|RAF1|RHOA|RPS19|RPS27A|SOS1|SSTR5
regulation of insulin receptor signaling pathway	ADORA3|ADRB2|AGTR1|AKT1|ARF6|ARSA|ATP5D|ATP7A|B4GALT1|CXCL12|CXCR4|DGKE|EIF2B1|ENPP1|ERBB2|GAA|IL8|INS|IRAK1|KNG1|NFKBIA|POMC|PPP2R1A|PRKCA|RAC1|RHOA|RPN1|RPN2|RPS27A|SSTR5|TP53
positive regulation of epithelial cell proliferation	ADORA3|ADRB2|AGTR1|AKT1|ARSA|B4GALT1|BDKRB2|C6|CXCL12|CXCR4|DGKE|EGFR|EIF2B1|ENPP1|ERBB2|GAA|GNAI2|IL8|INS|IRAK1|KNG1|MBL2|NME1-NME2|P2RY12|POMC|PPP2R1A|PRKCA|RPN1|RPN2|RPS27A|SSTR2|TP53
transmembrane ion transport	ACADVL|ADCY1|ADCY5|AKT1|ATP5A1|ATP5D|ATP5F1|ATP5J2|ATP7A|CROT|CYCS|ENPP1|GAA|INS|MAPK1|NME1-NME2|NT5C2|NUP43|PAFAH1B1|PKM2|POMC|PPP1CC|PRKCA|PRKDC|RHOC|SLC25A14
cellular macromolecular complex assembly	ADRB2|ATP7A|CCNH|CDK7|CDK9|CENPA|CENPF|EIF1AY|EIF2B1|EIF4E|ERCC2|GTF2B|GTF2H4|GTF2I|IRAK1|MNAT1|NCBP1|NFKB1|NFYA|NHP2L1|POLR2C|POLR2J|POLR2K|PPP2R1A|RAC1|RPLP0|RPS17|RPS24|RPS3|RPS5|SF3A1|SF3A2|SFRS5|SNRPB|SNRPD2|SNRPF|SRC|TBP|TCEB2|TP53|TUBA1A|TUBA4A|TUBB2C|TUBB4|TUBG1|XPO1|YBX1
translational elongation	ADRB2|AKT1|AKT2|AKT3|ARHGEF7|ATP7A|AURKB|B4GALT1|BUB1|BUB1B|BUB3|C5AR1|CASK|CASP3|CCNH|CDC2|CDC20|CDC25A|CDC7|CDK10|CDK2|CDK7|CDK9|CDKL1|CHEK1|CHUK|CPSF2|CSNK1G3|CXCR4|CYCS|DHX35|DHX9|EEF1A1|EEF1D|EEF1G|EEF2|EFTUD2|EGFR|EHMT1|EIF1AY|EIF2B1|EIF3E|EIF3H|EIF3I|EIF4A1|EIF4A2|EIF4B|EIF4E|EIF4G1|EIF4G2|EIF5B|ERBB2|ERCC2|FUS|FYN|GAA|GAK|GTF2B|GTF2H4|GTF2I|HNRNPA1|HNRNPA2B1|HNRNPC|HNRNPD|HNRNPF|HNRNPH1|H…
positive regulation of actin filament polymerization	ARF6|ARFGEF1|ARHGAP4|ARHGEF1|ARHGEF7|ATP7A|CDC42|CXCL12|ECT2|FYN|HRAS|MAP3K1|MAPRE1|PAFAH1B1|RAC1|RAF1|RHOA|RPS27A|SOS1|TP53|YWHAG
chemotaxis	ADORA3|AGTR1|AKT1|ATP7A|B4GALT1|BDKRB2|C5AR1|C6|CASP3|CCL20|CCL21|CCL5|CCR1|CCR5|CCR6|CXCL1|CXCL12|CXCR4|ENPP1|ERBB2|FYN|GAA|GNA12|HRAS|IL8|INS|IRAK1|KNG1|MAP2K1|MAP3K1|MAPK1|MBL2|NFKB1|NFKBIA|P2RY12|PAFAH1B1|PIK3CB|PKD2|PRKCA|RAC1|RELA|RPLP0|RPS3|RPS6|SSTR5|TLR9|TUBB2C
chemotaxis	ACTB|ADRB2|AGTR1|AKT1|ARF6|ATP7A|B4GALT1|C5AR1|C6|CCL20|CCL21|CCL5|CCR1|CCR5|CCR6|CDC7|CXCL1|CXCL12|CXCR4|DGKE|EGFR|ENPP1|ERBB2|FYN|GRB2|HRAS|IL8|INS|IRAK1|KNG1|MAP2K1|MAP3K1|MAPK1|MAPRE1|MBL2|NCL|NFKBIA|PAFAH1B1|PIK3CB|PIK3R1|PLCD1|PPP2R1A|PRKAA1|PRKCA|PRKCD|PRKDC|RAC1|RELA|RHOA|RPS19|RPS27A|RPS3|SOS1|SSTR5|STAT3|TLR9|TUBB2C
positive regulation of oxidoreductase activity	ADORA3|ADRB2|AGTR1|AKT1|ATP7A|B4GALT1|BDKRB2|CASP3|CDC7|CXCL12|CXCR4|DGKE|DYNLL1|EGFR|EIF2B1|ENPP1|ERBB2|GAA|GNAI2|GRB2|IKBKB|INS|IRAK1|KNG1|MAP3K1|NFKBIA|NSDHL|P2RY12|PIK3R1|PLCD1|POMC|PPP1CC|PPP2R1A|PRKCA|PRKDC|RAF1|RPS27A|SOS1|SRC|SSTR2|TP53|YWHAB
protein kinase cascade	ADORA3|ADRB2|AKT1|ARF6|B4GALT1|BDKRB2|C5AR1|C6|CASP3|CCL20|CCL21|CCL5|CCR1|CCR5|CHUK|COPA|CXCL1|CXCR4|DGKE|EGFR|ERBB2|FYN|GNA12|GRB2|IL8|INS|IRAK1|KNG1|MAP3K1|MAPK1|MBL2|NFKB1|NFKBIA|NME1-NME2|P2RY12|PIK3CB|PKD2|PPP2R1A|PRKAA1|PRKCA|RAC1|RELA|RPS27A|SOS1|SRC|STAT3|TLR9
motor axon guidance	AGTR1|AKT1|ARF6|ATP7A|B4GALT1|CCL20|CCL5|CCR5|CDC7|CXCL12|CXCR4|EGFR|ERBB2|IL8|INS|IRAK1|MAP3K1|MAPK1|NCL|NFKBIA|PAFAH1B1|PIK3R1|PLCD1|PRKAA1|PRKCA|PRKCD|PRKDC|RAC1|RELA|RPS19|RPS27A|SOS1|TLR9
regulation of oxidoreductase activity	AGTR1|AKT1|ATP7A|B4GALT1|BDKRB2|C5AR1|CCL5|CCR1|CCR5|CCR6|CDC42|CDC7|CXCL12|CXCR4|EGFR|ENPP1|ERBB2|IL8|INS|KNG1|MAP3K1|NCL|PAFAH1B1|PIK3CB|PIK3R1|PKD2|PLCD1|PRKCA|PRKCD|PRKDC|RAC1|RELA|RPLP0|RPN1|RPN2|RPS19|RPS27A|RPS6|SOS1|SRC|SSTR5|TLR9
second-messenger-mediated signaling	ADRB2|AGTR1|AKT1|ARF6|ATP5A1|B4GALT1|BIRC5|BUB1|BUB1B|BUB3|C5AR1|CASP3|CCL5|CCR1|CDC2|CDC25A|CDC42|CDC7|CDK10|CDK2|CDK7|CENPF|CHEK1|CXCL1|DGKE|DYNLL1|EGFR|EHMT1|ENPP1|ERBB2|ERCC2|GNAI2|GNB1|HRAS|HSPA5|HTR2B|IL8|INS|KNG1|MAD2L1|MAPK1|MAPRE1|MCC|MNAT1|NEK2|NFKB1|NFKBIA|NME1-NME2|P2RY12|PIK3C2G|PIK3CA|PIK3CB|PIK3CG|PIK3R1|PIK3R2|PINX1|PLCB2|PPP2R1A|PRKAA1|PRKCA|RAC1|RELA|RHOA|RPS13|RPS26|RPS3|SOS1|S…
regulation of kinase activity	ADRB2|BIRC5|BUB1|BUB1B|BUB3|C5AR1|CASP3|CCNH|CDC25A|CDC42|CDC7|CDK10|CDK2|CDK7|CENPF|CHEK1|CXCR4|CYCS|DGKE|EGFR|ERBB2|ERCC2|GTF2H4|IRAK1|MAD2L1|MAP3K1|MCC|MNAT1|NEK2|NME1-NME2|PIK3CB|PINX1|PPP2R1A|PRKAA1|PRKCA|RAC1|SOS1|TP53|TTK|YWHAG
positive regulation of oxidoreductase activity	ACTB|AGTR1|AKT1|ARF6|ATP7A|B4GALT1|CCL5|CCR6|CDC7|CXCL12|CXCR4|EGFR|ERBB2|IL8|INS|MAP2K1|MAP3K1|NCL|NSDHL|PAFAH1B1|PIK3R1|PLCD1|PRKCA|PRKCD|PRKDC|RAC1|RPS19|RPS27A|SOS1|STAT3|TUBB2C
circulatory system process	ADORA3|ADRB2|AGTR1|AKT1|B4GALT1|BDKRB2|COPA|CXCL12|DGKE|EIF2B1|ENPP1|GAA|GNAI2|HTR2B|IRAK1|KNG1|P2RY12|PIK3R1|POMC|PPP2R1A|PRKCA|SOS1|SSTR2|TP53
regulation of oxidoreductase activity	ADRB2|AGTR1|AKT1|ATP7A|B4GALT1|BDKRB2|C6|CASP3|CDK2|CXCL12|EGFR|ENPP1|ERBB2|FYN|IL8|INS|KNG1|MBL2|NFKBIA|POMC|PPP2R1A|PRKAA1|PRKCA|RAC1|RHOA|RPS3|RPS6|SSTR5|TP53
mitosis	AURKB|BIRC5|BUB1|BUB1B|BUB3|CASP3|CDC2|CDC20|CDC25A|CDC7|CDK10|CDK2|CDK7|CENPF|CHEK1|DYNC1H1|EGFR|EIF4G2|ERCC2|IL8|MAD2L1|MAPRE1|MCC|MNAT1|NEK2|NME1-NME2|NUDC|PAFAH1B1|PINX1|PKD2|PLK1|RCC2|RPS27A|SMC3|SOS1|TP53|TTK|TUBG1
regulation of insulin receptor signaling pathway	ADCY1|ADORA3|ADRB2|AGTR1|AKT1|ATP7A|B4GALT1|C5AR1|CASP3|CXCL12|CXCR4|DYNLL1|EGFR|ENPP1|ERBB2|GAA|GNB1|GNG2|GRB2|IL8|INS|IRAK1|MAP3K1|NME1-NME2|PIK3R1|PLCB2|PPP2R1A|PRKCA|RAC1|RPS19|SSTR3|TP53|YWHAG
chemotaxis	ACTB|ADORA3|ADRB2|AGTR1|AKT1|ARF6|ATP7A|B4GALT1|BDKRB2|C5AR1|C6|CASP3|CCL20|CCL21|CCL5|CCR1|CCR5|CCR6|CXCL1|CXCL12|CXCR4|EGFR|ENPP1|ERBB2|GAA|GNA12|GRB2|HRAS|IKBKB|IL8|INS|IRAK1|KNG1|MAP2K1|MAP3K1|MAPK1|MBL2|NFKB1|NFKBIA|P2RY12|PAFAH1B1|PIK3CB|PIK3R1|PINX1|PKD2|PPP2R1A|PRKAA1|PRKCA|PRKDC|RAC1|RELA|RPLP0|RPS17|RPS19|RPS24|RPS27A|RPS6|SOS1|SSTR5|STAT3|TERT|TLR9|TUBB2C
chemotaxis	ADORA3|ADRB2|AGTR1|AKT1|ARF6|ATP7A|B4GALT1|BDKRB2|C5AR1|C6|CASP3|CCL20|CCL21|CCL5|CCR1|CCR5|CCR6|CXCL1|CXCL12|CXCR4|EGFR|ENPP1|ERBB2|GAA|GNA12|HRAS|IKBKB|IL8|INS|KNG1|MAP2K1|MAP3K1|MAPK1|MBL2|NFKB1|NFKBIA|P2RY12|PAFAH1B1|PIK3CB|PIK3R1|PINX1|PKD2|PRKCA|PRKDC|RAC1|RELA|RHOA|RPLP0|RPS17|RPS19|RPS24|RPS6|SSTR5|TERT|TLR9|TUBB2C
apoptotic mitochondrial changes	ADRB2|AKT1|ATP5D|ATP7A|BIRC5|CASP3|CDK2|CHEK1|CYCS|EIF4G2|ENPP1|ERCC2|GNAI2|HRAS|HSP90AA1|HSPA5|IL8|INS|MAP3K1|NFKBIA|PKD2|PPP2R1A|PRKCA|PRKDC|RELA|RHOA|RPS19|RPS3|SLC25A14|SSTR1|SSTR2|TP53
regulation of oxidoreductase activity	ADH1A|ADH1C|ADH6|ADRB2|AGTR1|AKT1|ATP5D|ATP7A|B4GALT1|CASP3|CXCL12|CXCR4|CYP39A1|CYP7B1|DYNLL1|EGFR|EIF2B1|ENPP1|GAA|GRB2|IKBKB|IL8|INS|MAP3K1|NCL|NFKBIA|NSDHL|PAFAH1B1|PIK3R1|PKM2|PLCD1|PPP1CC|PRKAA1|PRKCA|PRKDC|RHOC|RPN1|RPN2|SRC|TP53|YWHAB
phosphoinositide phosphorylation	AKT1|ATP7A|CDC42|CXCL12|DGKE|EGFR|ERBB2|GRB2|IL8|IMPA1|KNG1|NFKBIA|P2RY12|PAFAH1B1|PIK3C2G|PIK3CA|PIK3CB|PIK3CG|PIK3R1|PLCB2|PLCD1|PPP2R1A|PRKDC|RPS19|SOS1
positive regulation of oxidoreductase activity	ADRB2|AGTR1|AKT1|ATP7A|CASP3|CDC7|CXCL12|CXCR4|CYCS|DYNLL1|EGFR|EIF2B1|ERBB2|ERCC2|GAA|GRB2|IKBKB|INS|IRAK1|MAP2K1|MAP3K1|NFKBIA|NSDHL|PIK3R1|PLCD1|PPP1CC|PPP2R1A|PRKCA|PRKDC|RELA|RPS17|RPS19|RPS24|RPS3|SSTR3|TP53|YWHAB|YWHAG
positive regulation of biological process	ADRB2|AGTR1|AKT1|ARF6|ATP5A1|ATP7A|B4GALT1|BIRC5|BUB1B|C6|CASP3|CCL5|CCNH|CDC2|CDC42|CDC7|CDK10|CDK2|CDK7|CENPF|CHEK1|CXCL1|CXCL12|CXCR4|CYCS|DYNLL1|ECT2|EEF1D|EGFR|EHMT1|EIF4G2|ENPP1|ERBB2|ERCC2|FYN|GNA12|HRAS|HSP90AA1|HSP90AB1|HSPA5|HTR2B|IKBKE|IL8|INS|IRAK1|ITGB3BP|KNG1|MAP3K1|MAPK1|MAPRE1|MBL2|MCC|MNAT1|NCBP1|NFKB1|NFKBIA|NME1-NME2|PIK3CG|PIK3R1|PIK3R2|PINX1|PPP2R1A|PRKAA1|PRKCA|PRKDC|RAC1|RA…
positive regulation of biological process	ADRB2|AGTR1|AKT1|ARF6|ATP7A|B4GALT1|BIRC5|BUB1B|C6|CASP3|CCNH|CDC2|CDC42|CDC7|CDK2|CDK7|CENPF|CXCL12|CXCR4|CYCS|DYNLL1|ECT2|EEF1D|EGFR|EIF4G2|ENPP1|ERBB2|ERCC2|FYN|GNA12|HRAS|HSP90AA1|HSP90AB1|HSPA5|HTR2B|IKBKE|IL8|INS|IRAK1|ITGB3BP|KNG1|MAP3K1|MAPK1|MBL2|MNAT1|NCBP1|NFKB1|NFKBIA|NME1-NME2|PIK3CG|PIK3R1|PPP2R1A|PRKAA1|PRKCA|PRKDC|RAC1|RAF1|RELA|RHOA|RHOC|RPS19|RPS27A|RPS3|SOS1|SSTR3|TBP|TLR9|TP53…
negative regulation of cellular process	ADRB2|AKT1|ARF6|ATP5A1|ATP7A|B4GALT1|BIRC5|BUB1B|CASP3|CCL5|CDC2|CDC42|CDK10|CENPF|CHEK1|CXCL1|CYCS|DYNLL1|EGFR|EHMT1|ENPP1|ERBB2|ERCC2|GNA12|HRAS|HSPA5|IL8|INS|KNG1|MAP3K1|MAPK1|MAPRE1|MCC|NFKB1|NFKBIA|NME1-NME2|PIK3CG|PIK3R1|PIK3R2|PINX1|PPP2R1A|PRKAA1|PRKCA|PRKDC|RAC1|RELA|RHOA|RPS13|RPS26|RPS27A|RPS3|SOS1|SSTR1|SSTR2|SSTR3|SSTR5|STAT3|TP53|TUBB2C|YWHAB|YWHAG|YWHAZ
regulation of oxidoreductase activity	AGTR1|AKT1|ATP7A|BUB1B|CASP3|CYCS|DYNLL1|EGFR|ERCC2|HNRNPA1|HRAS|IKBKB|INS|MAP3K1|MCC|NFKBIA|NME1-NME2|NSDHL|PINX1|PRKCA|PRKDC|RELA|RHOA|RPL23|RPN1|RPN2|RPS17|RPS19|RPS24|RPS3|SRC|TP53|XPO1|YWHAB
intracellular signaling cascade	ADCY1|ADCY5|ADORA3|ADRB2|AGTR1|AKT1|AKT2|AKT3|ARF6|ARHGAP4|ARHGEF7|ATP7A|AURKB|B4GALT1|BDKRB2|BIRC5|BUB1|BUB1B|BUB3|C5AR1|CASK|CASP3|CCNH|CCR1|CDC2|CDC20|CDC25A|CDC42|CDC7|CDK10|CDK2|CDK7|CDK9|CDKL1|CHEK1|CHML|CHN1|CHUK|CSNK1G3|CXCL1|CXCR4|CYCS|DGKE|DYNLL1|ECT2|EGFR|EHMT1|ERBB2|ERCC2|FYN|GAK|GDI2|GNA12|GNAI2|GNAI3|GNB1|GNG2|GRB2|HRAS|HSP90AA1|HSP90AB1|HSPA5|HTR2B|IKBKB|IKBKE|IL8|INS|IRAK1|MAD2L1|…
regulation of catalytic activity	ADORA3|ADRB2|AGTR1|AKT1|ATP7A|BIRC5|BUB1|BUB1B|BUB3|C5AR1|CASP3|CDC2|CDC20|CDC25A|CDC42|CDK10|CDK2|CDK7|CENPF|CHEK1|CHML|CXCR4|CYCS|DGKE|EGFR|ERBB2|ERCC2|GDI2|GNAI2|GNAI3|HSPA5|INS|IRAK1|MAD2L1|MAP3K1|MNAT1|NEK2|PAFAH1B1|PIK3CB|PLCB2|PLK1|PPP2R1A|PRKAA1|PRKCA|RAC1|RPS19|RPS27A|RPS3|SOS1|SSTR1|SSTR2|TP53|TTK|YWHAG
regulation of insulin receptor signaling pathway	ADCY1|ADORA3|ADRB2|AGTR1|AKT1|ATP7A|B4GALT1|CASP3|CXCL12|DYNLL1|EGFR|ENPP1|GAA|GNB1|GNG2|IL8|INS|NFKBIA|PAFAH1B1|PPP1CC|PPP2R1A|PRKCA|SSTR3|TP53|YWHAG
apoptotic program	AKT1|BIRC5|C5AR1|CASP3|CDK2|CHEK1|CHML|CYCS|DYNLL1|EGFR|ENPP1|ERCC2|GDI2|HRAS|HSPA5|INS|MAP3K1|MAPK1|NFKBIA|PAFAH1B1|PLCB2|PPP2R1A|PRKCA|PRKDC|RPS3|SLC25A14|SSTR3|TP53|TUBB2C|YWHAB
translational elongation	ADRB2|AKT1|AKT2|AKT3|ARHGEF7|ATP7A|AURKB|B4GALT1|BUB1|BUB1B|BUB3|C5AR1|C6|CASK|CASP3|CCNH|CDC2|CDC20|CDC25A|CDC7|CDK10|CDK2|CDK7|CDK9|CDKL1|CHEK1|CHUK|COPA|CPSF2|CSNK1G3|CXCR4|CYCS|DHX35|DHX9|DYNC1H1|EEF1A1|EEF1D|EEF1G|EEF2|EFTUD2|EGFR|EHMT1|EIF1AY|EIF2B1|EIF3E|EIF3H|EIF3I|EIF4A1|EIF4A2|EIF4B|EIF4E|EIF4G1|EIF4G2|EIF5B|ERBB2|ERCC2|FUS|FYN|GAA|GAK|GTF2B|GTF2H4|GTF2I|HNRNPA1|HNRNPA2B1|HNRNPC|HNRNPD|…
protein amino acid phosphorylation	ADORA3|ADRB2|AGTR1|AKT1|AKT2|AKT3|ARF6|ARHGEF7|ATP7A|AURKB|B4GALT1|BDKRB2|BIRC5|BUB1|BUB1B|BUB3|C5AR1|CASK|CASP3|CCL5|CCR1|CCR5|CCR6|CDC2|CDC20|CDC25A|CDC42|CDC7|CDK10|CDK2|CDK7|CDK9|CDKL1|CHEK1|CHML|CHUK|CSNK1G3|CXCL12|CXCR4|CYCS|DGKE|DYNLL1|EGFR|EHMT1|ENPP1|ERBB2|FYN|GAA|GAK|GDI2|GNA12|GNAI2|GNAI3|GNB1|GRB2|HSPA5|HTR2B|IKBKB|IKBKE|IL8|INS|IRAK1|KNG1|MAD2L1|MAP2K1|MAP3K1|MAPK1|MAPK3|MNAT1|NEK2|N…
positive regulation of catalytic activity	ADORA3|ADRB2|AGTR1|AKT1|ATP7A|B4GALT1|BDKRB2|BUB1B|C5AR1|CASP3|CDC2|CDC20|CDC25A|CDC42|CDK7|CHEK1|CHUK|CXCL12|CXCR4|CYCS|DGKE|EGFR|ERBB2|FYN|GNA12|GNB1|GRB2|HTR2B|IL8|INS|IRAK1|KNG1|MAP3K1|MAPK1|MNAT1|NFKBIA|P2RY12|PAFAH1B1|PIK3C2G|PIK3CA|PIK3CB|PIK3CG|PIK3R1|PKD2|PLCB2|PLK1|PPP2R1A|PRKAA1|PRKCA|RAC1|RAF1|RPS19|RPS27A|RPS3|SOS1|SRC|STAT3|TLR9|TP53|YWHAG
regulation of insulin receptor signaling pathway	ADCY1|ADH6|ADORA3|ADRB2|AGTR1|ATP7A|B4GALT1|CASP3|CDK2|CXCL12|DYNLL1|EGFR|EIF2B1|ENPP1|ERCC2|GAA|GNB1|GNG2|IL8|INS|MAPK1|MAPRE1|PPP2R1A|PRKCA|RELA|RPS3|SSTR3|TP53|TUBB2C|YWHAG
regulation of insulin receptor signaling pathway	ADCY1|ADH6|ADRB2|AKT1|ATP5D|ATP7A|B4GALT1|DYNLL1|EGFR|EIF2B1|ENPP1|GAA|GNB1|GNG2|INS|NFKBIA|PPP2R1A|PRKCA|RELA|TP53
regulation of oxidoreductase activity	ADRB2|AGTR1|AKT1|ARF6|ATP5D|ATP7A|B4GALT1|CASP3|CXCL12|CXCR4|DYNLL1|EGFR|EIF2B1|ENPP1|ERBB2|GAA|IL8|INS|MAPRE1|MBL2|NFKBIA|NSDHL|PAFAH1B1|PIK3R1|PPP2R1A|PRKAA1|PRKCA|PRKCD|PRKDC|RAC1|RHOA|RPS3|RPS6|SSTR5|TP53
small GTPase mediated signal transduction	ARF6|ARHGAP4|CDC42|CXCL12|EGFR|ENPP1|GNA12|GNB1|GRB2|HRAS|INS|MAP2K1|MAP3K1|MAPK1|MAPK3|MAPRE1|NFKBIA|PRKCA|RAC1|RAF1|RHOA|RHOC|RHOD|SOS1|SRC|YWHAB
negative regulation of apoptosis	AKT1|ARF6|ATP5D|ATP7A|BIRC5|CASP3|CDC2|CHEK1|CYCS|ERCC2|FYN|HRAS|HSPA5|INS|MAP3K1|NFKB1|NFKBIA|NME1-NME2|PAFAH1B1|PIK3CG|PIK3R1|PRKCA|PRKDC|RAC1|RELA|RHOA|RPS3|SOS1|TP53|YWHAZ
Rho protein signal transduction	ARF6|ARHGAP4|ATP7A|FYN|GNA12|HRAS|INS|NFKBIA|PAFAH1B1|RAC1|RHOA|RHOD|RPS27A|TP53|YWHAG
positive regulation of actin filament polymerization	ARF6|ARHGAP4|ATP7A|CDC42|CXCL12|EGFR|HRAS|INS|MAP3K1|MAPRE1|PIK3R1|PRKDC|RAC1|RAF1
mRNA 3'-end processing	PABPC1|PAPOLA|SLBP
cellular protein metabolic process	ADCY1|ADCY5|ADORA3|ADRB2|AGTR1|AKT1|AKT2|AKT3|ARF6|ARHGAP4|ARHGEF7|ATP5A1|ATP5D|ATP5F1|ATP7A|AURKB|B4GALT1|BIRC5|BUB1|BUB1B|BUB3|C5AR1|C6|CASK|CASP3|CCR1|CDC2|CDC20|CDC25A|CDC42|CDC7|CDK10|CDK2|CDK7|CDK9|CDKL1|CHEK1|CHML|CHN1|CHUK|COPA|CSNK1G3|CXCL1|CXCR4|CYCS|DGKE|DYNC1H1|DYNLL1|ECT2|EEF1A1|EEF1D|EEF1G|EEF2|EGFR|EHMT1|EIF1AY|EIF2B1|EIF3E|EIF3H|EIF3I|EIF4A1|EIF4A2|EIF4B|EIF4E|EIF5B|ENPP1|ERBB2|FY…
adaptive immune response	B4GALT1|C6|CASP3|CCR6|ERCC2|FYN|HRAS|INS|MBL2|PRKCD|PRKDC|RELA|TP53|TUBB2C
regulation of monooxygenase activity	ACADVL|ADORA3|ADRB2|AKT1|ATP5A1|ATP5D|ATP5F1|ATP7A|B4GALT1|CASP3|CROT|CYCS|DYNLL1|EGFR|EIF2B1|ENPP1|GAA|GRB2|IKBKB|INS|NFKBIA|NSDHL|PAFAH1B1|PIK3R1|PKM2|PLCD1|POMC|PPP1CC|PRKAA1|PRKCA|PRKDC|RHOC|SLC25A14|TP53|YWHAB
translational elongation	ADRB2|AKT1|AKT2|AKT3|ARHGEF7|ATP5A1|ATP5D|ATP5F1|ATP7A|AURKB|B4GALT1|BUB1|BUB1B|BUB3|C5AR1|C6|CASK|CASP3|CCNH|CDC2|CDC20|CDC25A|CDC7|CDK10|CDK2|CDK7|CDK9|CDKL1|CHEK1|CHUK|COPA|CPSF2|CSNK1G3|CXCR4|CYCS|DHX35|DHX9|DYNC1H1|EEF1A1|EEF1D|EEF1G|EEF2|EFTUD2|EGFR|EHMT1|EIF1AY|EIF2B1|EIF3E|EIF3H|EIF3I|EIF4A1|EIF4A2|EIF4B|EIF4E|EIF4G1|EIF4G2|EIF5B|ENPP1|ERBB2|ERCC2|FUS|FYN|GAA|GAK|GTF2B|GTF2H4|GTF2I|HNRNPA…
positive regulation of oxidoreductase activity	AGTR1|AKT1|ATP7A|B4GALT1|C6|CDC42|CDC7|CXCL12|CXCR4|EGFR|ENPP1|ERBB2|FYN|IL8|INS|KNG1|MAP3K1|MBL2|NCL|PAFAH1B1|PIK3R1|PLCD1|PRKCA|PRKCD|PRKDC|RAC1|RPS19|RPS27A|RPS3|SOS1
DNA fragmentation during apoptosis	ACADVL|AKT1|ATP5D|CASP3|CYCS|GAA|HSP90AA1|PPP1CC|RPS3|SLC25A14|TP53
DNA damage checkpoint	CASP3|CCL5|CHEK1|CYCS|EIF4G2|HRAS|HSPA5|IL8|PKD2|PRKCA|PRKDC|RPS3|STAT3|TP53
lipopolysaccharide-mediated signaling pathway	ADRB2|AKT1|ARF6|BIRC5|CASP3|CCL20|CDC2|ENPP1|GAA|HNRNPA1|HRAS|HSPA5|INS|IRAK1|MAPK1|NFKB1|NFKBIA|NME1-NME2|PIK3CG|PIK3R1|PPP2R1A|PRKCA|RAC1|RELA|RHOA|RPL23|SOS1|TLR9|TP53|XPO1|YWHAZ
adaptive immune response	AGTR1|B4GALT1|C6|CCR6|CXCL12|FYN|HRAS|IL8|INS|KNG1|MBL2|PAFAH1B1|PRKCA|PRKCD|PRKDC|RELA|RPS3|TUBB2C
lipopolysaccharide-mediated signaling pathway	AKT1|ATP7A|CDC42|CXCL12|EGFR|ENPP1|GAA|GRB2|INS|IRAK1|KNG1|MAPK1|NFKBIA|PIK3CB|PIK3R1|PRKDC|RHOA|RPS19|RPS3|SOS1|TP53
regulation of cell cycle	AGTR1|AKT1|ATP5A1|ATP7A|B4GALT1|BIRC5|BUB1|BUB1B|BUB3|CASP3|CDC25A|CDC7|CDK10|CDK2|CDK7|CENPF|CHEK1|CXCL1|EGFR|ERBB2|ERCC2|HRAS|IL8|MAD2L1|MAP3K1|MCC|MNAT1|NEK2|NFKBIA|NME1-NME2|PINX1|PRKCA|RELA|SSTR1|SSTR2|SSTR3|SSTR5|TP53|TTK
regulation of insulin receptor signaling pathway	ADRB2|AKT1|ATP5D|ATP7A|B4GALT1|BIRC5|CASP3|CDK2|CHEK1|CYCS|DYNLL1|EGFR|EIF2B1|ENPP1|ERCC2|GAA|HRAS|HSPA5|INS|MAPK1|MAPRE1|NFKBIA|PIK3R1|PPP2R1A|PRKCA|PRKDC|RPS3|SSTR3|TP53|TUBB2C
positive regulation of oxidoreductase activity	AGTR1|AKT1|ATP7A|B4GALT1|C6|CASP3|CDK2|CXCR4|CYP39A1|CYP7B1|EGFR|ENPP1|ERBB2|GAA|INS|MBL2|NFKBIA|PIK3R2|PKM2|PPP2R1A|PRKAA1|PRKCA|RAC1|RHOA|RHOC|RPS3|RPS6|SSTR5|TP53
phosphorylation	ADORA3|ADRB2|AGTR1|AKT1|AKT2|AKT3|ARF6|ARHGEF7|ATP5A1|ATP5D|ATP5F1|ATP7A|AURKB|B4GALT1|BDKRB2|BIRC5|BUB1|BUB1B|BUB3|C5AR1|CASK|CASP3|CCNH|CDC2|CDC20|CDC25A|CDC42|CDC7|CDK10|CDK2|CDK7|CDK9|CDKL1|CHEK1|CHML|CHUK|CSNK1G3|CXCR4|CYCS|DGKE|EGFR|EHMT1|ENPP1|ERBB2|ERCC2|FYN|GAK|GDI2|GNA12|GNAI2|GNAI3|GRB2|HSP90AA1|HSP90AB1|HSPA5|IKBKB|IKBKE|IMPA1|INS|IRAK1|MAD2L1|MAP2K1|MAP3K1|MAPK1|MAPK3|MNAT1|NCBP1|NEK…
protein amino acid phosphorylation	ADORA3|ADRB2|AGTR1|AKT1|AKT2|AKT3|ARHGEF7|ATP7A|AURKB|B4GALT1|BDKRB2|BIRC5|BUB1|BUB1B|BUB3|C5AR1|CASK|CASP3|CCR1|CDC2|CDC20|CDC25A|CDC42|CDC7|CDK10|CDK2|CDK7|CDK9|CDKL1|CHEK1|CHML|CHUK|CSNK1G3|CXCL12|CXCR4|CYCS|DGKE|EGFR|ERBB2|FYN|GAK|GDI2|GNA12|GNAI2|GNAI3|GNB1|GRB2|HSPA5|HTR2B|IKBKB|IKBKE|IL8|INS|IRAK1|KNG1|MAD2L1|MAP2K1|MAP3K1|MAPK1|MAPK3|MNAT1|NEK2|NFKBIA|P2RY12|PAFAH1B1|PIK3C2G|PIK3CA|PIK3CB…
homeostasis of number of cells	ADRB2|AKT1|ATP7A|CASP3|CYCS|DYNLL1|EGFR|EIF2B1|ERBB2|GAA|GRB2|IKBKB|INS|IRAK1|MAP2K1|MAP3K1|NFKBIA|NSDHL|PIK3R1|PLCD1|PPP1CC|PRKCA|PRKDC|RELA|RPS17|RPS19|RPS24|RPS3|SSTR3|TP53|YWHAB
positive regulation of oxidoreductase activity	ADRB2|AGTR1|AKT1|ARF6|ATP5D|ATP7A|B4GALT1|C6|CASP3|CDK2|DYNLL1|EGFR|EIF2B1|ENPP1|ERBB2|GAA|INS|MAPRE1|MBL2|NFKBIA|PPP2R1A|PRKAA1|PRKCA|RAC1|RHOA|RPS3|RPS6|SSTR5|TP53
M phase	AURKB|BIRC5|BUB1|BUB1B|BUB3|CDC2|CDC20|CDC25A|CDC7|CDK10|CDK2|CENPF|CHEK1|DYNC1H1|MAD2L1|MAPRE1|NEK2|NUDC|PAFAH1B1|PLK1|RCC2|SMC3|SOS1|TP53|TTK|TUBG1
negative regulation of phosphorylation	ADORA3|ADRB2|AGTR1|AKT1|ATP5D|ATP7A|B4GALT1|CASP3|CDK2|CENPF|CHEK1|CYCS|DYNLL1|EGFR|EIF2B1|ENPP1|HRAS|HSPA5|INS|IRAK1|KNG1|MAPK1|MAPRE1|MNAT1|NFKBIA|PIK3R1|PPP2R1A|PRKCA|PRKDC|RAC1|RPS3|SRC|TCEB2|TP53|TUBA1A|TUBA4A|TUBB2C|TUBB4|TUBG1|XPO1
regulation of insulin receptor signaling pathway	ADCY1|ADRB2|AGTR1|AKT1|ARF6|ATP5D|ATP7A|B4GALT1|CASP3|DYNLL1|EGFR|EIF2B1|ENPP1|ERCC2|GAA|GNB1|GNG2|IL8|INS|KNG1|MAPK1|MAPRE1|NFKBIA|PPP2R1A|PRKCA|RAC1|RPS3|SSTR3|TP53|TUBB2C|YWHAB|YWHAG
nucleoside phosphate metabolic process	ADCY1|ADCY5|ATP5A1|ATP5D|ATP5F1|ATP5J2|ENPP1|GNB1|GNG2|MAPK1|NME1-NME2|NT5C2|PRKCA
response to hypoxia	ACADVL|ADH1A|ADH1C|ADH6|AKT1|ATP7A|B4GALT1|CROT|CXCR4|CYP39A1|CYP7B1|ECHS1|EHHADH|GAA|HADH|HADHA|HADHB|INS|NSDHL|PIK3R2|PKM2|PRKAA1|RHOC
positive regulation of actin filament polymerization	ARF6|ARFGEF1|ARHGEF1|ARHGEF7|ECT2|FYN|HRAS|MAP3K1|PAFAH1B1|RAC1|SOS1
regulation of insulin receptor signaling pathway	ADCY1|ADORA3|ADRB2|AGTR1|AKT1|ARF6|ATP5D|ATP7A|B4GALT1|CASP3|CXCL12|DYNLL1|EGFR|EIF2B1|ENPP1|ERBB2|GAA|GNB1|GNG2|IL8|INS|KNG1|MAP3K1|MAPRE1|MBL2|NFKBIA|PPP2R1A|PRKAA1|PRKCA|RAC1|RHOA|RPS3|RPS6|SSTR3|SSTR5|TP53
regulation of insulin receptor signaling pathway	ADCY1|ADORA3|ADRB2|AGTR1|AKT1|ARF6|ATP5D|ATP7A|B4GALT1|CASP3|CXCL12|DYNLL1|EGFR|EIF2B1|ENPP1|GAA|GNB1|GNG2|IL8|INS|MAPRE1|NFKBIA|PPP2R1A|PRKCA|RAC1|SSTR3|TP53|YWHAG
regulation of oxidoreductase activity	AGTR1|AKT1|ATP5A1|ATP5D|ATP5F1|ATP7A|B4GALT1|C6|CASP3|CDC42|CDK2|CXCL12|CXCR4|EGFR|ENPP1|ERBB2|HRAS|IL8|INS|MBL2|NFKBIA|NSDHL|PAFAH1B1|PIK3R1|PPP2R1A|PRKAA1|PRKCA|PRKCD|PRKDC|RAC1|RHOA|RPS3|RPS6|SSTR5|TP53
regulation of oxidoreductase activity	ADRB2|AGTR1|AKT1|ARF6|ATP7A|B4GALT1|CCL5|CDC42|CDC7|CXCL12|CXCR4|EGFR|ENPP1|ERBB2|IL8|INS|MAP3K1|NCL|NFKBIA|PAFAH1B1|PIK3R1|PLCD1|PRKCA|PRKCD|PRKDC|RAC1|RELA|RHOA|RPS19|RPS27A|SOS1|SSTR5|TLR9
motor axon guidance	AKT1|ATP7A|B4GALT1|C6|CCL20|CCL5|CCR5|CDC7|CXCL12|CXCR4|EGFR|ERBB2|IL8|INS|IRAK1|MAP3K1|MAPK1|MBL2|NCL|NFKBIA|PAFAH1B1|PIK3R1|PLCD1|PRKAA1|PRKCA|PRKCD|PRKDC|RAC1|RELA|RPS19|RPS27A|SOS1|TLR9
mitotic sister chromatid segregation	BIRC5|CDC7|CDK2|CENPF|CHEK1|HSPA5|MAD2L1|NEK2|SMC3|TP53|TUBG1
positive regulation of oxidoreductase activity	AGTR1|AKT1|ATP5A1|ATP5D|ATP5F1|ATP5J2|ATP7A|CDC42|ENPP1|HRAS|HSP90AA1|INS|NSDHL|NUP43|PAFAH1B1|PIK3R1|PRKCA|PRKDC|RHOA|SLC25A14|TP53
positive regulation of nitric oxide biosynthetic process	ADRB2|AGTR1|AKT1|ALDH3A2|ATP7A|B4GALT1|BDKRB2|C5AR1|CASP3|CDC42|CXCR4|DGKE|EGFR|EIF2B1|ERBB2|GRB2|HSP90AA1|HSP90AB1|INS|IRAK1|MAP3K1|NME1-NME2|PIK3CB|PIK3R1|PLCD1|PRKAA1|PRKCA|PRKDC|RAC1|RAF1|RPLP0|SOS1|SRC
lipopolysaccharide-mediated signaling pathway	AKT1|ARHGAP4|ATP7A|ENPP1|GAA|GNA12|HRAS|INS|IRAK1|MAPK1|NFKBIA|PIK3R1|RHOA|RHOD|RPS3|TP53
regulation of insulin receptor signaling pathway	ADORA3|ADRB2|AGTR1|AKT1|ATP5D|ATP7A|B4GALT1|BDKRB2|DGKE|DYNLL1|EGFR|EIF2B1|ENPP1|GAA|GNAI2|INS|IRAK1|KNG1|NFKBIA|P2RY12|POMC|PPP2R1A|PRKCA|SSTR2|TP53
lipid modification	ACADVL|AGTR1|BUB1B|C5AR1|DGKE|ECHS1|EGFR|EHHADH|ERBB2|GNB1|HADHA|HADHB|HTR2B|IL8|IMPA1|KNG1|PAFAH1B1|PIK3C2G|PIK3CA|PIK3CB|PIK3CG|PIK3R1|PLCB2|PLCD1|PPP2R1A|PRKAA1|SOS1
positive regulation of oxidoreductase activity	ADRB2|AGTR1|AKT1|ATP7A|BDKRB2|CASP3|CDC42|CDC7|CXCL12|CXCR4|DYNLL1|EGFR|EIF2B1|ERBB2|GAA|GRB2|IKBKB|INS|IRAK1|KNG1|MAP3K1|NFKBIA|NSDHL|PIK3CB|PIK3R1|PLCD1|PPP1CC|PRKDC|RAF1|RPS19|SOS1|SRC|TP53|YWHAB
second-messenger-mediated signaling	ACADVL|ADORA3|ADRB2|AGTR1|AKT1|ATP7A|BUB1B|C5AR1|CCR1|CDC2|CDC20|CDC42|CXCR4|CYCS|DGKE|ECHS1|EGFR|EHHADH|ERBB2|GNAI2|GNB1|HADHA|HADHB|HTR2B|IL8|IMPA1|INS|IRAK1|MAP3K1|P2RY12|PAFAH1B1|PIK3C2G|PIK3CA|PIK3CB|PIK3CG|PIK3R1|PLCB2|PLCD1|PLK1|PPP2R1A|PRKAA1|PRKCA|RAC1|RPS27A|RPS3|SOS1|SSTR1|SSTR2|SSTR3|SSTR5|TP53
motor axon guidance	ACTB|AGTR1|AKT1|ARF6|ATP7A|B4GALT1|CCL5|CCR6|CDC7|CXCL12|CXCR4|EGFR|ERBB2|IL8|INS|MAP2K1|MAP3K1|NCL|PAFAH1B1|PIK3R1|PLCD1|PRKCA|PRKCD|PRKDC|RAC1|RELA|RPS19|RPS27A|SOS1|STAT3|TLR9|TUBB2C
intracellular signaling cascade	ADCY1|ADCY5|ADRB2|AGTR1|AKT1|ARF6|ARHGAP4|ARHGEF7|ATP5A1|ATP7A|B4GALT1|BIRC5|BUB1B|C5AR1|C6|CASP3|CCL5|CCNH|CCR1|CDC2|CDC25A|CDC42|CDC7|CDK10|CDK2|CDK7|CENPF|CHEK1|CHN1|CHUK|CXCL1|CXCL12|CXCR4|CYCS|DGKE|DYNLL1|ECT2|EEF1D|EGFR|EHMT1|ENPP1|ERBB2|ERCC2|FYN|GNA12|GNAI2|GNB1|GNG2|GRB2|HRAS|HSP90AA1|HSP90AB1|HSPA5|HTR2B|IKBKE|IL8|INS|IRAK1|KNG1|MAP2K1|MAP3K1|MAPK1|MAPK3|MAPRE1|MBL2|MCC|MNAT1|NCBP1|NFKB…
intracellular signaling cascade	ADCY1|ADCY5|ADORA3|ADRB2|AGTR1|AKT1|ARF6|ARHGAP4|ARHGEF7|ATP5A1|ATP7A|B4GALT1|BIRC5|BUB1B|BUB3|C5AR1|C6|CASP3|CCL5|CCNH|CCR1|CDC2|CDC20|CDC25A|CDC42|CDC7|CDK10|CDK2|CDK7|CENPF|CHEK1|CHML|CHN1|CHUK|CXCL1|CXCL12|CXCR4|CYCS|DGKE|DYNLL1|ECT2|EEF1D|EGFR|EHMT1|ENPP1|ERBB2|ERCC2|FYN|GDI2|GNA12|GNAI2|GNAI3|GNB1|GNG2|GRB2|HRAS|HSP90AA1|HSP90AB1|HSPA5|HTR2B|IKBKE|IL8|INS|IRAK1|KNG1|MAD2L1|MAP2K1|MAP3K1|MAP…
morphogenesis of a branching structure	ADRB2|AKT1|ARSA|ATP7A|B4GALT1|CXCL12|CXCR4|ENPP1|ERBB2|GAA|IL8|PRKCA|PRKDC|RPN1|RPN2|SRC
mitosis	ATP7A|AURKB|BIRC5|BUB1|BUB1B|BUB3|CASP3|CDC2|CDC20|CDC25A|CDC7|CDK10|CDK2|CDK7|CENPF|CHEK1|DYNC1H1|EGFR|EIF4G2|ERCC2|GNAI2|GNAI3|HSPA5|IL8|INS|MAD2L1|MAPRE1|MCC|MNAT1|NEK2|NME1-NME2|NUDC|PAFAH1B1|PINX1|PKD2|PLK1|PPP2R1A|PRKCA|RCC2|RPS27A|SMC3|SOS1|SSTR2|TP53|TTK|TUBG1|YWHAG
cellular calcium ion homeostasis	ADORA3|ADRB2|AGTR1|AKT1|ATP7A|B4GALT1|BDKRB2|C5AR1|C6|CCL20|CCL21|CCL5|CCR1|CCR5|CCR6|CXCL1|CXCL12|CXCR4|EGFR|ENPP1|ERBB2|FYN|GAA|HTR2B|IL8|INS|KNG1|MAP3K1|MBL2|NFKB1|PIK3CB|PIK3R1|PKD2|POMC|PRKCA|PRKCD|PRKDC|RAC1|RELA|RPLP0|RPS3|RPS6|SSTR5|TLR9
induction of positive chemotaxis	AGTR1|B4GALT1|C6|CCR6|CXCL12|CXCR4|EGFR|FYN|IL8|INS|KNG1|MAP3K1|MBL2|PIK3R1|PRKCA|PRKCD|RPS3|TUBB2C
positive regulation of oxidoreductase activity	AGTR1|AKT1|ATP7A|B4GALT1|C6|CASP3|CDK2|CXCL12|CYCS|EGFR|ENPP1|ERBB2|FYN|IKBKB|IL8|INS|IRAK1|KNG1|MBL2|NFKBIA|PPP2R1A|PRKAA1|PRKCA|RAC1|RELA|RHOA|RPS3|RPS6|SSTR5|TP53
mitotic cell cycle spindle assembly checkpoint	BIRC5|BUB1|CDC2|CDC20|CENPF|CXCL12|CXCR4|ERBB2|HRAS|MAD2L1|PLK1|RPS27A|TTK|YWHAG
locomotory behavior	ACTB|AGTR1|AKT1|ARF6|ATP7A|B4GALT1|C5AR1|CCL20|CCL21|CCL5|CCR1|CCR5|CCR6|CDC7|CXCL1|CXCL12|CXCR4|EGFR|ERBB2|GAA|HRAS|IL8|INS|MAP2K1|MAP3K1|MAPK1|NCL|PAFAH1B1|PIK3CB|PIK3R1|PLCD1|PRKCA|PRKCD|PRKDC|RAC1|RPS19|RPS27A|SOS1|STAT3|TUBB2C
motor axon guidance	ACTB|ADRB2|AKT1|ARF6|ARSA|ATP7A|B4GALT1|CCL20|CCL5|CCR5|CCR6|CDC7|CXCL12|CXCR4|EGFR|ENPP1|ERBB2|GAA|IL8|INS|IRAK1|MAP2K1|MAP3K1|MAPK1|NCL|NFKBIA|PAFAH1B1|PIK3R1|PLCD1|PRKAA1|PRKCA|PRKCD|PRKDC|RAC1|RELA|RPN1|RPN2|RPS19|RPS27A|SOS1|STAT3|TLR9|TUBB2C
cellular ion homeostasis	ACTB|AGTR1|AKT1|ARF6|ATP7A|B4GALT1|BDKRB2|C5AR1|CCL5|CCR1|CCR5|CCR6|CDC7|CXCL12|CXCR4|EGFR|ENPP1|ERBB2|GAA|IL8|INS|KNG1|MAP2K1|MAP3K1|NCL|PAFAH1B1|PIK3CB|PIK3R1|PKD2|PLCD1|PRKCA|PRKCD|PRKDC|RAC1|RELA|RPLP0|RPS27A|SOS1|STAT3|TLR9|TUBB2C
homeostatic process	ADRB2|AGTR1|AKT1|ATP7A|BDKRB2|C5AR1|CASP3|CCL5|CCR1|CCR5|CCR6|CXCL12|CXCR4|ENPP1|ERBB2|GAA|IKBKB|INS|KNG1|MAP3K1|PIK3CB|PINX1|PKD2|PRKCA|PRKDC|RPLP0|RPS17|RPS19|RPS24|RPS6|SSTR5|TERT|TP53
chemotaxis	ADORA3|ADRB2|AGTR1|AKT1|ARF6|ATP7A|B4GALT1|BDKRB2|C5AR1|C6|CASP3|CCL20|CCL21|CCL5|CCR1|CCR5|CCR6|CXCL1|CXCL12|CXCR4|EGFR|ENPP1|ERBB2|FYN|GAA|GNA12|HRAS|IKBKB|IL8|INS|KNG1|MAP2K1|MAP3K1|MAPK1|MBL2|NFKB1|NFKBIA|P2RY12|PAFAH1B1|PIK3CB|PIK3R1|PINX1|PKD2|PRKCA|PRKDC|RAC1|RELA|RHOA|RPLP0|RPS17|RPS19|RPS24|RPS3|RPS6|SSTR5|TERT|TLR9|TUBB2C
negative regulation of cell proliferation	ADRB2|AKT1|ALDH3A2|ARSA|ATP5A1|B4GALT1|BUB1B|CASP3|CDK10|CHEK1|CXCL1|CXCL12|CXCR4|EGFR|ERBB2|GAA|GNA12|GRB2|IL8|INS|IRAK1|MAP3K1|MCC|NME1-NME2|P2RY12|PIK3CB|PIK3R1|PINX1|PRKCA|RAC1|RPLP0|RPS19|SSTR1|SSTR2|SSTR3|SSTR5|TP53
spindle checkpoint	BIRC5|BUB1|BUB1B|BUB3|CDK10|CDK2|CENPF|CHEK1|ERCC2|MAD2L1|NEK2|RPS27A|TP53|TTK
regulation of oxidoreductase activity	ADORA3|ADRB2|AGTR1|AKT1|ARF6|ATP7A|B4GALT1|BDKRB2|C6|CASP3|CXCL12|EGFR|ENPP1|ERBB2|FYN|GAA|IL8|INS|KNG1|MAP3K1|MAPRE1|MBL2|NFKBIA|POMC|PPP2R1A|PRKAA1|PRKCA|RAC1|RHOA|RPS3|RPS6|SSTR3|SSTR5|TP53
regulation of phosphoinositide 3-kinase activity	AKT1|ATP5D|ATP7A|CDC42|CXCL12|CXCR4|IL8|INS|MAPRE1|NFKBIA|PAFAH1B1|PIK3CB|PIK3R1|PRKCA|PRKCD|PRKDC|RAC1|RPN1|RPN2|SRC|TP53
positive regulation of oxidoreductase activity	ADCY1|ADORA3|ADRB2|AGTR1|AKT1|ATP7A|B4GALT1|BDKRB2|C6|CASP3|CXCL12|DYNLL1|EGFR|ENPP1|FYN|GAA|GNB1|GNG2|IL8|INS|KNG1|MBL2|POMC|PPP2R1A|PRKCA|RPS3|SSTR3|TP53|YWHAG
regulation of MAP kinase activity	ADORA3|ADRB2|AGTR1|AKT1|ATP7A|B4GALT1|C5AR1|CASP3|CXCL12|CXCR4|DYNLL1|EGFR|ENPP1|ERBB2|ERCC2|GAA|GRB2|IL8|INS|MAP3K1|MAPK1|MAPRE1|PIK3CB|PIK3R1|PLCB2|PPP2R1A|PRKAA1|PRKCA|RAC1|RPS3|SOS1|SSTR3|TP53|TUBB2C|YWHAG
intracellular signaling cascade	ADCY1|ADCY5|ADORA3|ADRB2|AGTR1|AKT1|AKT2|AKT3|ARF6|ARHGAP4|ARHGEF7|ATP5A1|ATP7A|AURKB|B4GALT1|BIRC5|BUB1|BUB1B|BUB3|C5AR1|CASK|CASP3|CCNH|CCR1|CDC2|CDC20|CDC25A|CDC42|CDC7|CDK10|CDK2|CDK7|CDK9|CDKL1|CENPF|CHEK1|CHML|CHN1|CHUK|CSNK1G3|CXCL1|CXCR4|CYCS|DGKE|DYNLL1|ECT2|EGFR|EHMT1|ENPP1|ERBB2|ERCC2|FYN|GAK|GDI2|GNA12|GNAI2|GNAI3|GNB1|GNG2|GRB2|HRAS|HSP90AA1|HSP90AB1|HSPA5|HTR2B|IKBKB|IKBKE|IL8|INS|I…
regulation of catalytic activity	ADORA3|ADRB2|AGTR1|AKT1|ARF6|ATP5A1|ATP7A|B4GALT1|BIRC5|BUB1B|BUB3|C5AR1|C6|CASP3|CCL5|CCNH|CDC2|CDC20|CDC25A|CDC42|CDC7|CDK10|CDK2|CDK7|CENPF|CHEK1|CHML|CXCL1|CXCL12|CXCR4|CYCS|DGKE|DYNLL1|ECT2|EEF1D|EGFR|EHMT1|ENPP1|ERBB2|ERCC2|FYN|GDI2|GNA12|GNAI2|GNAI3|HRAS|HSP90AA1|HSP90AB1|HSPA5|HTR2B|IKBKE|IL8|INS|IRAK1|KNG1|MAD2L1|MAP3K1|MAPK1|MAPRE1|MBL2|MCC|MNAT1|NCBP1|NFKB1|NFKBIA|NME1-NME2|PAFAH1B1|PI…
inflammatory response	ADORA3|ADRB2|AGTR1|AKT1|ARSA|ATP7A|B4GALT1|BDKRB2|C6|CCL20|CCL21|CCL5|CCR1|CCR5|CCR6|CXCL1|CXCL12|CXCR4|ENPP1|ERBB2|FYN|GAA|GNA12|IL8|INS|KNG1|MAP3K1|MBL2|NFKB1|NFKBIA|P2RY12|PIK3CB|PKM2|PRKAA1|PRKCA|PRKCD|PRKDC|RAC1|RELA|RHOA|RHOC|RPS27A|RPS3|TLR9|TUBB2C
body fluid secretion	B4GALT1|COPA|ERBB2|GNA12|IL8|INS|KNG1|MAP3K1|P2RY12|PIK3CB|PIK3R1|PPP2R1A|SOS1
cytosolic calcium ion homeostasis	ADORA3|ADRB2|AGTR1|AKT1|B4GALT1|BDKRB2|C5AR1|CCR1|CCR5|CCR6|COPA|CXCL12|CXCR4|DGKE|EGFR|EIF2B1|ENPP1|GAA|HTR2B|IL8|INS|IRAK1|KNG1|PIK3R1|POMC|PRKCA|SOS1
regulation of insulin receptor signaling pathway	ACTB|ADORA3|ADRB2|AGTR1|AKT1|ARF6|ARSA|ATP7A|B4GALT1|C6|CASP3|CCL5|CCR6|CXCL12|CXCR4|EGFR|ENPP1|ERBB2|FYN|GAA|IL8|INS|KNG1|MAP2K1|MAP3K1|MBL2|NCL|PAFAH1B1|PIK3R1|PLCD1|PPP2R1A|PRKCA|RAC1|RPN1|RPN2|RPS27A|SSTR3|STAT3|TP53|TUBB2C
liver development	ADRB2|AGTR1|AKT1|ARF6|ATP7A|BDKRB2|COPA|CXCL12|EGFR|ERBB2|GRB2|IL8|KNG1|NFKBIA|PIK3CB|PIK3R1|PPP2R1A|PRKDC|SOS1
neuron migration	ADORA3|AKT1|ATP7A|B4GALT1|CXCR4|ENPP1|FYN|GAA|HRAS|NFKBIA|PAFAH1B1|PPP1CC|PRKCA
chemotaxis	ACTB|ADORA3|ADRB2|AGTR1|AKT1|ARF6|ATP7A|B4GALT1|C5AR1|C6|CASP3|CCL20|CCL21|CCL5|CCR1|CCR5|CCR6|CXCL1|CXCL12|CXCR4|EGFR|ENPP1|ERBB2|FYN|GAA|HRAS|IL8|INS|KNG1|MAP2K1|MAP3K1|MAPK1|MBL2|NCL|PAFAH1B1|PIK3CB|PIK3R1|PLCD1|PPP2R1A|PRKCA|PRKCD|PRKDC|RAC1|RPS27A|RPS3|SSTR3|STAT3|TP53|TUBB2C
positive regulation of nitric oxide biosynthetic process	ADRB2|AGTR1|AKT1|ATP7A|B4GALT1|C5AR1|CASP3|CXCL12|DYNLL1|EGFR|EIF2B1|ENPP1|ERBB2|GAA|GRB2|HSP90AA1|HSP90AB1|IKBKB|IL8|INS|IRAK1|MBL2|NFKBIA|NSDHL|PIK3R1|PKM2|PLCB2|PLCD1|PPP1CC|PPP2R1A|PRKAA1|PRKCA|PRKDC|RAC1|RHOA|RHOC|RPS27A|RPS3|RPS6|SSTR5|TP53|YWHAB
positive regulation of nitric oxide biosynthetic process	ADRB2|AGTR1|AKT1|ATP7A|B4GALT1|C6|CASP3|CDC7|CDK2|CXCL12|CXCR4|DYNLL1|EGFR|EIF2B1|ENPP1|ERBB2|GAA|GRB2|HSP90AA1|HSP90AB1|IKBKB|INS|IRAK1|MAP3K1|MBL2|NFKBIA|NSDHL|PIK3R1|PKM2|PLCD1|PPP1CC|PPP2R1A|PRKAA1|PRKCA|PRKDC|RAC1|RHOA|RHOC|RPS27A|RPS3|RPS6|SSTR5|TP53|YWHAB
regulation of insulin receptor signaling pathway	ADRB2|AGTR1|AKT1|ARF6|B4GALT1|CXCL12|CXCR4|ECT2|EEF1D|EGFR|ENPP1|HRAS|HTR2B|IKBKE|IL8|INS|KNG1|MAP3K1|MAPRE1|NFKBIA|PIK3R1|PPP2R1A|PRKCA|RAC1|RELA|RHOA|RHOC|RPS19|RPS27A|SSTR5
regulation of cellular protein metabolic process	ADRB2|AGTR1|AKT1|ARF6|ARHGAP4|ATP7A|B4GALT1|CDC42|CXCL12|CXCR4|DYNLL1|EGFR|EIF2S1|EIF3E|EIF3H|EIF3I|EIF4A2|EIF4B|EIF4E|EIF4G1|EIF4G2|EIF5|EIF5B|ENPP1|GAA|IL8|INS|KNG1|MAP3K1|MAPK1|MAPRE1|NFKBIA|PIK3R1|PPP2R1A|PRKCA|RAC1|RAF1|RHOA|RPS19|SSTR5|TP53
regulation of DNA replication	ADRB2|BIRC5|C5AR1|CASP3|CDK2|CYCS|EGFR|ENPP1|ERCC2|HSPA5|INS|MAPK1|MAPRE1|PLCB2|PPP2R1A|PRKCA|RPS3|SSTR3|TP53|TUBB2C
apoptotic mitochondrial changes	ADRB2|AKT1|ATP5D|ATP7A|BIRC5|C5AR1|CASP3|CDK2|CHEK1|CYCS|DYNLL1|EGFR|EIF4G2|ENPP1|ERCC2|HRAS|HSP90AA1|HSPA5|IKBKB|IL8|INS|IRAK1|MAP3K1|MAPK1|NFKBIA|PKD2|PLCB2|PPP2R1A|PRKCA|PRKDC|RELA|RHOA|RPS3|SLC25A14|SSTR3|TP53|TUBB2C|YWHAB
positive regulation of actin filament polymerization	ARF6|ARFGEF1|ARHGAP4|ARHGEF1|ARHGEF7|ATP7A|CDC42|CXCL12|ECT2|EGFR|FYN|HRAS|INS|MAP3K1|MAPRE1|PAFAH1B1|RAC1|RAF1|RHOA|RPS27A|SOS1|TP53|YWHAG
B cell homeostasis	ADRB2|CALM1|CASP3|CCR1|IKBKB|INS|IRAK1|NFKBIA|RELA|RPS3|STAT3|TP53
positive regulation of catalytic activity	ADORA3|ADRB2|AGTR1|AKT1|ATP7A|BDKRB2|C5AR1|CASP3|CDC2|CDC20|CDC25A|CDC42|CDK7|CHEK1|CHUK|CXCL12|CXCR4|CYCS|DGKE|EGFR|ERBB2|FYN|GNA12|GRB2|INS|IRAK1|MAP3K1|MAPK1|MNAT1|NFKBIA|PIK3CB|PIK3R1|PKD2|PLCB2|PLK1|PPP2R1A|PRKAA1|PRKCA|RAC1|RAF1|RPS27A|RPS3|SOS1|SRC|STAT3|TLR9|TP53|YWHAG
regulation of insulin receptor signaling pathway	AGTR1|AKT1|ALDH3A2|ATP7A|B4GALT1|CASP3|CXCL12|CXCR4|CYCS|EGFR|ENPP1|ERBB2|GNA12|IKBKB|INS|MAP2K1|MAP3K1|MBL2|NFKBIA|P2RY12|PIK3CB|PRKAA1|PRKCA|RAC1|RHOA|RPLP0|RPS3|RPS6|SSTR3|SSTR5|TP53
lipopolysaccharide-mediated signaling pathway	ADRB2|AKT1|CALM1|CASP3|CCL20|CCL5|CCR1|CXCL12|CXCR4|DGKE|IKBKB|IRAK1|MAPK1|NFKBIA|RELA|RPS3|STAT3|TLR9
negative regulation of cellular process	ADRB2|AKT1|ARF6|ATP5A1|ATP7A|B4GALT1|BIRC5|BUB1B|CASP3|CCL5|CDC2|CDC42|CDK10|CENPF|CHEK1|CXCL1|CYCS|DYNLL1|EGFR|EHMT1|ENPP1|ERBB2|ERCC2|GNA12|HRAS|HSPA5|IL8|INS|KNG1|MAPK1|MAPRE1|MCC|NFKB1|NFKBIA|NME1-NME2|PIK3CG|PIK3R1|PIK3R2|PINX1|PPP2R1A|PRKAA1|PRKCA|PRKDC|RAC1|RELA|RHOA|RPS13|RPS26|RPS27A|RPS3|SOS1|SSTR1|SSTR2|SSTR3|SSTR5|STAT3|TP53|TUBB2C|YWHAB|YWHAG|YWHAZ
lipopolysaccharide-mediated signaling pathway	ADRB2|CALM1|CCL20|CCL5|CCR1|CHUK|CXCL12|CXCR4|DGKE|IKBKB|IRAK1|MAP3K1|MAPK1|NFKBIA|RELA|RPS3|STAT3|TLR9
lipopolysaccharide-mediated signaling pathway	ADRB2|AKT1|CALM1|CYCS|ENPP1|GAA|IKBKB|INS|IRAK1|MAPK1|NFKBIA|PIK3R1|RELA|RHOA|RPS3|TP53
regulation of translational initiation	AKT1|ARF6|CDC42|CXCL12|EGFR|EIF2S1|EIF3E|EIF3H|EIF3I|EIF4A2|EIF4B|EIF4E|EIF4G1|EIF4G2|EIF5|EIF5B|ENPP1|GNA12|INS|MAP3K1|MAPRE1|PABPC1|PPP2R1A|PRKCA|PRKCD|RAC1|RPS27A
positive regulation of kinase activity	ADRB2|ARF6|ARHGAP4|C5AR1|CDC42|CXCL12|CXCR4|DGKE|EGFR|EIF2S1|EIF3E|EIF3H|EIF3I|EIF4A2|EIF4B|EIF4G1|EIF4G2|EIF5|EIF5B|ENPP1|ERBB2|GNA12|HRAS|INS|IRAK1|MAP3K1|MAPRE1|NFKBIA|PIK3CB|PRKAA1|PRKCA|RAC1|RAF1|RPS27A|SOS1
apoptotic mitochondrial changes	AKT1|ATP7A|CASP3|ENPP1|HNRNPA1|HNRNPA2B1|MAP3K1|MAPK1|NCBP1|NFKBIA|NUP43|PIK3R1|RPL23|SSR2|TP53|UPF3B|XPO1|YWHAB|YWHAE|YWHAG
positive regulation of nitric oxide biosynthetic process	ADRB2|AGTR1|AKT1|ARF6|ATP7A|B4GALT1|CCNH|CDK7|EGFR|ERBB2|ERCC2|GAA|HSP90AA1|HSP90AB1|HSPA8|INS|IRAK1|MAP3K1|MNAT1|NCBP1|NFKB1|PKM2|PRKAA1|PRKCA|RAC1|RHOC|RPS27A|TLR9|TP53
regulation of MAP kinase activity	ADRB2|AGTR1|AKT1|ARF6|ATP7A|C5AR1|CASP3|CXCR4|DYNLL1|EGFR|ENPP1|ERBB2|INS|MAP3K1|MAPRE1|NFKBIA|PIK3CB|PPP2R1A|PRKAA1|PRKCA|RAC1|SOS1|TP53|YWHAG
Ras protein signal transduction	ADRB2|AKT1|ARHGAP4|BDKRB2|C5AR1|CDC42|CHUK|CXCR4|DGKE|EGFR|ERBB2|FYN|GNA12|GNB1|GRB2|HRAS|IL8|INS|IRAK1|KNG1|MAP2K1|MAP3K1|MAPK1|MAPK3|NFKBIA|PIK3CB|PIK3R1|PKD2|PPP2R1A|PRKAA1|PRKCA|RAC1|RAF1|RHOA|RHOD|SOS1|SRC|STAT3|TLR9|YWHAB
positive regulation of oxidoreductase activity	ADCY1|ADORA3|ADRB2|AGTR1|AKT1|ATP5A1|ATP5D|ATP5F1|ATP7A|B4GALT1|CASP3|CDC42|CXCL12|DYNLL1|EGFR|ENPP1|GAA|GNB1|GNG2|HRAS|IL8|INS|NSDHL|PAFAH1B1|PIK3R1|PPP2R1A|PRKCA|PRKDC|RHOA|SSTR3|TP53|YWHAG
positive regulation of oxidoreductase activity	AGTR1|AKT1|ARHGAP4|ATP7A|B4GALT1|C6|CASP3|CDK2|EGFR|ENPP1|ERBB2|GNA12|HRAS|INS|MBL2|NFKBIA|PPP2R1A|PRKAA1|PRKCA|RAC1|RHOA|RHOD|RPS3|RPS6|SSTR5|TP53
lipopolysaccharide-mediated signaling pathway	ADRB2|AGTR1|AKT1|ARF6|ATP7A|B4GALT1|CASP3|EGFR|ENPP1|ERBB2|GAA|HRAS|INS|IRAK1|MAPK1|MBL2|NFKBIA|PIK3R1|PRKAA1|PRKCA|RAC1|RHOA|RPS3|RPS6|SSTR5|TP53
positive regulation of oxidoreductase activity	AGTR1|AKT1|ARF6|ATP7A|B4GALT1|C6|CASP3|CDK2|EGFR|ENPP1|ERBB2|GAA|INS|IRAK1|MAPK1|MBL2|NFKBIA|PIK3R1|PPP2R1A|PRKAA1|PRKCA|RAC1|RHOA|RPS3|RPS6|SSTR5|TP53
lipopolysaccharide-mediated signaling pathway	ADORA3|ADRB2|AKT1|ARF6|ATP5D|ATP7A|B4GALT1|EIF2B1|ENPP1|GAA|INS|IRAK1|MAPK1|NFKBIA|PAFAH1B1|PIK3R1|PPP1CC|PPP2R1A|PRKCA|RAC1|RHOA|RPS3|TP53
positive regulation of nitric oxide biosynthetic process	ADRB2|AGTR1|AKT1|ARF6|ATP7A|B4GALT1|C6|ECT2|EEF1D|EGFR|EIF2B1|ENPP1|ERBB2|GAA|GNA12|HRAS|HSP90AA1|HSP90AB1|HTR2B|IKBKE|INS|MAP3K1|MBL2|NFKBIA|P2RY12|PIK3CB|PKM2|PRKAA1|PRKCA|RAC1|RELA|RHOA|RHOC|RPS27A|SSTR5
regulation of translational initiation	ADRB2|AGTR1|AKT1|ARF6|B4GALT1|CDC42|CXCL12|CXCR4|EGFR|EIF2S1|EIF3E|EIF3H|EIF3I|EIF4A2|EIF4B|EIF4E|EIF4G1|EIF4G2|EIF5|EIF5B|ENPP1|GNA12|INS|MAP3K1|MAPRE1|NFKBIA|PABPC1|PIK3R1|PPP2R1A|PRKCA|PRKCD|RAC1|RHOA|RPS19|RPS27A|SSTR5
regulation of cellular protein metabolic process	ADRB2|AGTR1|AKT1|ARF6|ARHGAP4|B4GALT1|CCNH|CDC42|CDK7|CXCL12|CXCR4|EGFR|EIF2S1|EIF3E|EIF3H|EIF3I|EIF4A2|EIF4B|EIF4E|EIF4G1|EIF4G2|EIF5|EIF5B|ENPP1|ERBB2|ERCC2|GNA12|HSP90AA1|HSP90AB1|IL8|INS|IRAK1|KNG1|MAP3K1|MAPRE1|MNAT1|NCBP1|NFKB1|NFKBIA|P2RY12|PIK3CB|PIK3R1|PPP2R1A|PRKAA1|PRKCA|RAC1|RAF1|RHOA|RPS19|RPS27A|SSTR5|TLR9|TP53
regulation of cellular protein metabolic process	ADCY1|ADRB2|AGTR1|AKT1|ARF6|ATP7A|B4GALT1|CASP3|CDK2|CXCL12|DYNLL1|EGFR|EIF2B1|EIF2S1|EIF3E|EIF3H|EIF3I|EIF4A2|EIF4B|EIF4E|EIF4G1|EIF4G2|EIF5|EIF5B|ENPP1|GNB1|GNG2|IL8|INS|KNG1|MAP3K1|MAPRE1|NFKBIA|PPP2R1A|PRKCA|RAC1|RHOA|RPS3|SSTR5|TP53|YWHAG
motor axon guidance	AKT1|ALDH3A2|B4GALT1|CASP3|CXCL12|CXCR4|CYCS|EGFR|ERBB2|ERCC2|IKBKB|INS|IRAK1|MAP2K1|MAP3K1|NME1-NME2|PPP2R1A|PRKCA|RELA|RPLP0|RPS27A|SSTR3|TP53|YWHAG
positive regulation of epithelial cell proliferation	ADRB2|AGTR1|AKT1|B4GALT1|BDKRB2|C5AR1|CXCL12|EGFR|ENPP1|ERBB2|GRB2|IL8|INS|IRAK1|NME1-NME2|PIK3R1|PLCB2|PPP2R1A|PRKCA|RAC1|RAF1|RPS19|SOS1|SRC
regulation of MAP kinase activity	ADRB2|AGTR1|AKT1|ARF6|ATP7A|B4GALT1|C5AR1|CCL5|CDC7|CXCL12|CXCR4|DGKE|EGFR|ENPP1|ERBB2|IL8|INS|IRAK1|MAP3K1|MAPRE1|NCL|NFKBIA|NME1-NME2|PAFAH1B1|PIK3CB|PIK3R1|PLCD1|PPP2R1A|PRKAA1|PRKCA|PRKCD|PRKDC|RAC1|RELA|RHOA|RPS19|RPS27A|SOS1|SSTR5|TLR9
regulation of localization	ADRB2|AGTR1|AKT1|ARF6|ATP7A|B4GALT1|CXCL12|CXCR4|EGFR|ENPP1|GRB2|IL8|INS|MAP3K1|NFKBIA|PIK3CB|PIK3R1|PRKCA|PRKCD|PRKDC|RAC1|RHOA|RPS19|SSTR5
cytosolic calcium ion homeostasis	ADRB2|AGTR1|AKT1|ATP7A|BDKRB2|C5AR1|C6|CCR1|CCR5|CCR6|COPA|CXCL12|CXCR4|EGFR|FYN|GAA|HTR2B|IL8|INS|KNG1|MBL2|PIK3R1|POMC|PRKCA|RPS3|SOS1
spindle checkpoint	BIRC5|BUB1|BUB1B|BUB3|CDC42|CDC7|CDK10|CDK2|CENPF|CHEK1|COPA|ERCC2|HSPA5|MAD2L1|NEK2|PAFAH1B1|RPS27A|TP53|TTK
G1 phase of mitotic cell cycle	BIRC5|CDC7|CDK10|CDK2|CENPF|CHEK1|INS|PPP2R1A|TP53
spindle organization	BIRC5|BUB1B|CHEK1|DYNC1H1|MAD2L1|NEK2|PAFAH1B1|SMC3|TP53|TTK|TUBG1
mitotic cell cycle	AURKB|BIRC5|BUB1|BUB1B|BUB3|CASP3|CDC2|CDC20|CDC25A|CDC42|CDC7|CDK10|CDK2|CDK7|CENPF|CHEK1|COPA|DYNC1H1|EGFR|EIF4G2|ERCC2|IL8|MAD2L1|MAPRE1|MCC|MNAT1|NEK2|NME1-NME2|NUDC|PAFAH1B1|PINX1|PKD2|PLK1|RCC2|RPS27A|SMC3|SOS1|TP53|TTK|TUBG1
regulation of catalytic activity	ADORA3|ADRB2|AGTR1|AKT1|ATP7A|BIRC5|BUB1B|BUB3|C5AR1|CASP3|CDC2|CDC20|CDC25A|CDC42|CDK7|CHEK1|CHML|CXCR4|CYCS|DGKE|EGFR|ERBB2|GDI2|GNAI2|GNAI3|GNB1|HSPA5|HTR2B|INS|IRAK1|MAD2L1|MAP3K1|MNAT1|PAFAH1B1|PIK3CB|PLCB2|PLK1|PPP2R1A|PRKAA1|PRKCA|RAC1|RPS27A|RPS3|SOS1|SSTR2|TP53|YWHAG
protein amino acid phosphorylation	ADORA3|ADRB2|AGTR1|AKT1|AKT2|AKT3|ARF6|ARHGEF7|ATP5A1|ATP5D|ATP5F1|ATP7A|AURKB|B4GALT1|BDKRB2|BIRC5|BUB1|BUB1B|BUB3|C5AR1|CASK|CASP3|CCNH|CDC2|CDC20|CDC25A|CDC42|CDC7|CDK10|CDK2|CDK7|CDK9|CDKL1|CHEK1|CHML|CHUK|CSNK1G3|CXCL12|CXCR4|CYCS|DGKE|DYNLL1|ECT2|EEF1D|EGFR|EHMT1|ENPP1|ERBB2|ERCC2|FYN|GAK|GDI2|GNA12|GNAI2|GNAI3|GRB2|HRAS|HSP90AA1|HSP90AB1|HSPA5|HTR2B|IKBKB|IKBKE|IMPA1|INS|IRAK1|KNG1|MAD2L1|…
positive regulation of catalytic activity	ADORA3|ADRB2|AGTR1|AKT1|ATP7A|B4GALT1|C5AR1|CASP3|CDC2|CDC20|CDC42|CXCL12|CXCR4|CYCS|DGKE|DYNLL1|EGFR|ENPP1|ERBB2|GAA|GNB1|HSP90AA1|HSP90AB1|HTR2B|IL8|INS|IRAK1|KNG1|MAP3K1|NSDHL|PIK3CB|PIK3R1|PKM2|PLCB2|PLK1|PPP2R1A|PRKAA1|PRKCA|PRKCD|PRKDC|RAC1|RHOC|RPN1|RPN2|RPS27A|RPS3|SOS1|SRC|TP53
second-messenger-mediated signaling	ADRB2|AGTR1|AKT1|ATP7A|BIRC5|BUB1B|C5AR1|CCR1|CHML|CXCR4|CYCS|DGKE|EGFR|ERBB2|GDI2|GNAI2|GNB1|HSPA5|HTR2B|IL8|INS|IRAK1|MAP3K1|P2RY12|PAFAH1B1|PIK3C2G|PIK3CA|PIK3CB|PIK3CG|PLCB2|PPP2R1A|PRKAA1|RPS3|SOS1|SSTR1|SSTR2|SSTR3|SSTR5|TP53
cellular calcium ion homeostasis	ADORA3|ADRB2|AGTR1|AKT1|ATP7A|B4GALT1|BDKRB2|C5AR1|CCL5|CCR1|CCR5|CCR6|COPA|CXCL12|CXCR4|ENPP1|GAA|HTR2B|IL8|INS|KNG1|PIK3CB|PKD2|POMC|PRKCA
positive regulation of catalytic activity	ADORA3|ADRB2|AGTR1|AKT1|ATP7A|BIRC5|C5AR1|CASP3|CDC2|CDC20|CDC42|CDK2|CHML|CXCR4|CYCS|DGKE|DYNLL1|EGFR|ERBB2|GDI2|GNB1|HSPA5|HTR2B|INS|IRAK1|MAP3K1|PAFAH1B1|PIK3CB|PLCB2|PLK1|PPP2R1A|PRKAA1|RAC1|RPS27A|RPS3|SOS1|TP53|YWHAB
negative regulation of apoptosis	AKT1|BIRC5|C5AR1|CASP3|CDC2|CDC7|CDK2|CENPF|CHEK1|CHML|CYCS|EGFR|ENPP1|GDI2|GNAI2|HRAS|HSPA5|NEK2|NFKB1|NFKBIA|NME1-NME2|PAFAH1B1|PIK3CG|PIK3R1|PLCB2|PPP2R1A|PRKCA|PRKDC|RELA|RHOA|RPS19|RPS3|SOS1|SSTR1|SSTR2|TP53|YWHAZ
regulation of catalytic activity	ADORA3|ADRB2|AGTR1|AKT1|ARF6|ATP7A|BDKRB2|BIRC5|BUB1B|BUB3|C5AR1|CASP3|CCNH|CDC2|CDC20|CDC25A|CDC42|CDK7|CHEK1|CHML|CHUK|CXCL12|CXCR4|CYCS|DGKE|EGFR|ERBB2|ERCC2|FYN|GDI2|GNA12|GNAI2|GNAI3|GNB1|GRB2|HSP90AA1|HSP90AB1|HSPA5|HTR2B|INS|IRAK1|MAD2L1|MAP3K1|MAPK1|MAPRE1|MNAT1|NCBP1|NFKB1|NFKBIA|PAFAH1B1|PIK3C2G|PIK3CA|PIK3CB|PIK3CG|PIK3R1|PKD2|PLCB2|PLK1|PPP2R1A|PRKAA1|PRKCA|RAC1|RAF1|RPS27A|RPS3|SOS1|…
regulation of kinase activity	ADRB2|AGTR1|AKT1|ATP7A|B4GALT1|BIRC5|BUB1B|BUB3|C5AR1|CASP3|CDC20|CDC25A|CDC42|CDK7|CHEK1|CXCR4|CYCS|DGKE|DYNLL1|EGFR|ENPP1|ERBB2|ERCC2|GAA|GNAI2|GNAI3|HSPA5|IKBKB|IL8|INS|IRAK1|KNG1|MAD2L1|MAP2K1|MAP3K1|MAPK1|MAPRE1|MNAT1|PIK3CB|PPP2R1A|PRKAA1|PRKCA|RAC1|RPS27A|RPS3|SOS1|SSTR2|SSTR3|TP53|TUBB2C|YWHAB|YWHAG
vascular process in circulatory system	ADORA3|ADRB2|AGTR1|AKT1|B4GALT1|BDKRB2|DGKE|EIF2B1|ENPP1|GAA|GNAI2|GNAI3|IRAK1|KNG1|P2RY12|POMC|PPP2R1A|PRKCA|SSTR2|TP53
positive regulation of nitric oxide biosynthetic process	ADH1A|ADH1C|ADH6|ADRB2|AGTR1|AKT1|ATP5D|ATP7A|B4GALT1|BDKRB2|CASP3|CXCL12|CXCR4|CYP39A1|CYP7B1|EGFR|EIF2B1|ENPP1|ERBB2|GAA|HSP90AA1|HSP90AB1|IL8|INS|KNG1|MAP3K1|MBL2|NCL|NFKBIA|NSDHL|PAFAH1B1|PIK3R1|PKM2|PLCD1|PRKAA1|PRKCA|PRKCD|PRKDC|RAC1|RHOA|RHOC|RPN1|RPN2|RPS27A|RPS3|SRC|TP53
DNA damage checkpoint	BIRC5|CDC7|CDK10|CDK2|CENPF|CHEK1|HSPA5|NEK2|TP53
mitosis	ATP7A|AURKB|BIRC5|BUB1|BUB1B|BUB3|CASP3|CDC2|CDC20|CDC25A|CDC7|CDK10|CDK2|CENPF|CHEK1|DYNC1H1|EIF4G2|ERCC2|GNAI2|GNAI3|HSPA5|IL8|INS|MAD2L1|MAPRE1|NEK2|NUDC|PAFAH1B1|PKD2|PLK1|PPP2R1A|PRKCA|RCC2|RPS27A|SMC3|SOS1|SSTR2|TP53|TTK|TUBG1|YWHAG
regulation of ubiquitin-protein ligase activity during mitotic cell cycle	BUB1B|BUB3|CDC2|CDC20|CENPF|MAD2L1|PLK1|RPS27A
phosphoinositide-mediated signaling	ADRB2|AGTR1|AKT1|BIRC5|BUB1B|C5AR1|CHML|CXCL12|CXCR4|CYCS|DGKE|EGFR|ERBB2|GDI2|GNB1|GRB2|HSPA5|HTR2B|IL8|INS|MAP3K1|PAFAH1B1|PIK3C2G|PIK3CA|PIK3CB|PIK3CG|PIK3R1|PLCB2|PPP2R1A|PRKAA1|PRKCA|RAC1|RPS3|SOS1|TP53
chemotaxis	ADORA3|ADRB2|AGTR1|AKT1|ATP7A|B4GALT1|BDKRB2|C5AR1|C6|CASP3|CCL20|CCL21|CCL5|CCR1|CCR5|CCR6|CXCL1|CXCL12|CXCR4|ENPP1|ERBB2|GAA|HRAS|HTR2B|IKBKB|IL8|INS|KNG1|MAP2K1|MAPK1|MBL2|NFKB1|PAFAH1B1|PIK3CB|PINX1|PKD2|POMC|PRKCA|PRKDC|RAC1|RELA|RPLP0|RPS17|RPS19|RPS24|RPS6|SSTR5|TERT|TLR9|TUBB2C
regulation of cellular protein metabolic process	ADRB2|AGTR1|AKT1|ARF6|ARHGAP4|ATP7A|B4GALT1|CDC42|CXCL12|CXCR4|EGFR|EIF2S1|EIF3E|EIF3H|EIF3I|EIF4A2|EIF4B|EIF4E|EIF4G1|EIF4G2|EIF5|EIF5B|ENPP1|ERBB2|GNA12|IL8|INS|MAP3K1|MAPRE1|NFKBIA|PAFAH1B1|PIK3R1|PPP2R1A|PRKCA|RAC1|RAF1|RHOA|RPS19|RPS27A|SSTR5
positive regulation of actin filament polymerization	ARF6|ARFGEF1|ARHGAP4|ARHGEF1|ARHGEF7|CDC42|CXCL12|ECT2|EGFR|ENPP1|HRAS|INS|MAP3K1|MAPRE1|NFKBIA|PAFAH1B1|PRKCA|RAC1|RAF1|SOS1
positive regulation of oxidoreductase activity	ADORA3|ADRB2|AGTR1|AKT1|ATP7A|B4GALT1|BDKRB2|CXCL12|DGKE|EGFR|EIF2B1|ENPP1|GAA|GNAI2|HTR2B|IL8|INS|IRAK1|KNG1|P2RY12|POMC|PPP2R1A|PRKCA|SSTR2|TP53
positive regulation of actin filament polymerization	AGTR1|AKT1|ARF6|ARHGAP4|B4GALT1|C5AR1|CDC42|CXCL12|EGFR|ENPP1|ERBB2|GRB2|HRAS|IL8|INS|IRAK1|MAP3K1|MAPRE1|NME1-NME2|PIK3R1|PLCB2|PPP2R1A|PRKCA|RAC1|RAF1|RPS19
chemotaxis	ADORA3|ADRB2|AKT1|ATP7A|B4GALT1|BDKRB2|C5AR1|C6|CALM1|CCL20|CCL21|CCL5|CCR1|CCR5|CCR6|CHUK|CXCL1|CXCL12|CXCR4|ERBB2|GAA|HRAS|IKBKB|IL8|INS|IRAK1|KNG1|MAP2K1|MAP3K1|MAPK1|MBL2|NFKB1|NFKBIA|PAFAH1B1|PIK3CB|PRKCA|PRKCD|RAC1|RELA|RPS3|TLR9
mitosis	AGTR1|ATP5A1|AURKB|B4GALT1|BIRC5|BUB1|BUB1B|BUB3|CASP3|CDC2|CDC20|CDC25A|CDC7|CDK10|CDK2|CDK7|CENPF|CHEK1|CXCL1|DYNC1H1|EGFR|EIF4G2|ERBB2|ERCC2|HRAS|IL8|MAD2L1|MAPRE1|MCC|MNAT1|NEK2|NFKBIA|NME1-NME2|NUDC|PAFAH1B1|PINX1|PKD2|PLK1|RCC2|RPS27A|SMC3|SOS1|SSTR1|SSTR2|SSTR3|SSTR5|TP53|TTK|TUBG1
cell aging	ARF6|CENPF|FYN|HRAS|PAFAH1B1|RAC1|RHOA|RPS27A|TP53|YWHAG
apoptotic program	AKT1|BIRC5|C5AR1|CASP3|CDK2|CHML|CYCS|DYNLL1|EGFR|GDI2|GNAI2|HSPA5|INS|MAP3K1|PAFAH1B1|PLCB2|PPP2R1A|RPS19|RPS3|SSTR1|SSTR2|TP53|YWHAB
chemotaxis	ACTB|ADORA3|ADRB2|AGTR1|AKT1|ARF6|ATP7A|B4GALT1|BDKRB2|C5AR1|C6|CASP3|CCL20|CCL21|CCL5|CCR1|CCR5|CCR6|CXCL1|CXCL12|CXCR4|EGFR|ENPP1|ERBB2|FYN|GAA|GNA12|GRB2|HRAS|HTR2B|IKBKB|IL8|INS|KNG1|MAP2K1|MAP3K1|MAPK1|MBL2|NFKB1|P2RY12|PAFAH1B1|PIK3CB|PINX1|PKD2|POMC|PPP2R1A|PRKAA1|PRKCA|PRKDC|RAC1|RELA|RPLP0|RPS17|RPS19|RPS24|RPS27A|RPS3|RPS6|SOS1|SSTR5|STAT3|TERT|TLR9|TUBB2C
G-protein signaling, coupled to cAMP nucleotide second messenger	ADCY1|ADRB2|GNAI2|GNAI3|GNB1|GNG2|P2RY12|PRKCA|SSTR1|SSTR2
chemotaxis	ACTB|ADORA3|ADRB2|AGTR1|AKT1|ARF6|ATP7A|B4GALT1|BDKRB2|C5AR1|C6|CASP3|CCL20|CCL21|CCL5|CCR1|CCR5|CCR6|CXCL1|CXCL12|CXCR4|EGFR|ENPP1|ERBB2|GAA|GNA12|HRAS|IKBKB|IL8|INS|KNG1|MAP2K1|MAP3K1|MAPK1|MBL2|NFKB1|P2RY12|PAFAH1B1|PIK3CB|PINX1|PKD2|PPP2R1A|PRKAA1|PRKCA|PRKDC|RAC1|RELA|RPLP0|RPS17|RPS19|RPS24|RPS27A|RPS6|SOS1|SSTR5|STAT3|TERT|TLR9|TUBB2C
transmembrane ion transport	ACADVL|ADCY1|ADCY5|AKT1|ATP5A1|ATP5D|ATP5F1|ATP5J2|ATP7A|CROT|CYCS|ENPP1|GAA|MAPK1|NME1-NME2|NT5C2|NUP43|PKM2|POMC|PPP1CC|RHOC|SLC25A14
positive regulation of oxidoreductase activity	AGTR1|AKT1|ARF6|ARHGAP4|ATP7A|B4GALT1|C6|CASP3|CDC42|CDK2|CXCL12|EGFR|ENPP1|ERBB2|HRAS|INS|MAP3K1|MAPRE1|MBL2|NFKBIA|PPP2R1A|PRKAA1|PRKCA|RAC1|RAF1|RHOA|RPS3|RPS6|SSTR5|TP53
regulation of insulin receptor signaling pathway	ADCY1|ADORA3|ADRB2|AGTR1|ATP7A|B4GALT1|C6|CASP3|CCL5|CXCL12|CXCR4|DYNLL1|EGFR|EIF4G2|ENPP1|FYN|GAA|GNB1|GNG2|IL8|INS|KNG1|MAP3K1|MBL2|PIK3R1|PKD2|PPP2R1A|PRKCA|RPS3|SSTR3|TP53|YWHAG
positive regulation of epithelial cell proliferation	ADORA3|ADRB2|AKT1|ARSA|B4GALT1|C6|CXCL12|CXCR4|EGFR|ENPP1|ERBB2|GAA|IL8|INS|MBL2|NFKBIA|NME1-NME2|PAFAH1B1|PKM2|PPP1CC|PRKAA1|PRKCA|RHOC|RPN1|RPN2
positive regulation of nitric oxide biosynthetic process	ACADVL|ADH1A|ADH1C|ADH6|ADRB2|AGTR1|AKT1|ATP5A1|ATP5D|ATP5F1|ATP7A|B4GALT1|CROT|CYCS|CYP39A1|CYP7B1|EGFR|ENPP1|GAA|HSP90AA1|HSP90AB1|INS|NSDHL|PKM2|POMC|PPP1CC|PRKAA1|RHOC|RPS27A|SLC25A14
positive regulation of oxidoreductase activity	ADH1A|ADH1C|ADH6|AGTR1|AKT1|ATP7A|B4GALT1|CYP39A1|CYP7B1|GAA|INS|NSDHL|PKM2|PRKAA1|RHOC
transmembrane ion transport	ACADVL|ADCY1|ADCY5|AKT1|ATP5A1|ATP5D|ATP5F1|ATP5J2|ATP7A|B4GALT1|CROT|CYCS|ENPP1|GAA|INS|MAPK1|NME1-NME2|NT5C2|PKM2|POMC|PPP1CC|PRKAA1|RHOC|SLC25A14
DNA damage checkpoint	ADRB2|AGTR1|AKT1|ATP7A|CASP3|CDK10|CDK2|CHEK1|CYCS|ENPP1|ERBB2|HRAS|HSPA5|INS|MAPRE1|MBL2|NFKBIA|PPP2R1A|PRKAA1|PRKCA|PRKDC|RAC1|RHOA|RPS3|TP53
RNA elongation from RNA polymerase II promoter	ADRB2|AKT1|ARF6|CASP3|CCNH|CDC25A|CDK7|CDK9|CENPA|CENPF|CHEK1|CYCS|EGFR|ERCC2|GTF2B|GTF2H4|GTF2I|HRAS|HSP90AA1|HSP90AB1|INS|IRAK1|MAP3K1|MNAT1|NCBP1|NFKB1|NFYA|POLR2C|POLR2J|POLR2K|PRKAA1|PRKCA|PRKDC|RAC1|RELA|RPS27A|TBP|TCEB2|TLR9|TP53|YBX1
intracellular signaling cascade	ADCY1|ADCY5|ADORA3|ADRB2|AGTR1|AKT1|AKT2|AKT3|ARF6|ARHGAP4|ARHGEF7|ATP5A1|ATP5D|ATP5F1|ATP7A|AURKB|B4GALT1|BIRC5|BUB1|BUB1B|BUB3|C5AR1|C6|CASK|CASP3|CCL5|CCNH|CCR1|CDC2|CDC20|CDC25A|CDC42|CDC7|CDK10|CDK2|CDK7|CDK9|CDKL1|CENPF|CHEK1|CHML|CHN1|CHUK|CSNK1G3|CXCL1|CXCL12|CXCR4|CYCS|DGKE|DYNLL1|ECT2|EEF1D|EGFR|EHMT1|ENPP1|ERBB2|ERCC2|FYN|GAK|GDI2|GNA12|GNAI2|GNAI3|GNB1|GNG2|GRB2|HRAS|HSP90AA1|HSP90AB1…
positive regulation of catalytic activity	ADORA3|ADRB2|AGTR1|AKT1|ATP7A|BDKRB2|C5AR1|CASP3|CCL20|CCL21|CCL5|CCR1|CCR5|CCR6|CDC2|CDC20|CDC25A|CDC42|CDK7|CHEK1|CHUK|CXCL1|CXCL12|CXCR4|CYCS|DGKE|EGFR|ERBB2|FYN|GAA|GNA12|GRB2|HRAS|IL8|INS|IRAK1|KNG1|MAP2K1|MAP3K1|MAPK1|MNAT1|NFKBIA|PAFAH1B1|PIK3CB|PIK3R1|PKD2|PLCB2|PLK1|PPP2R1A|PRKAA1|PRKCA|RAC1|RAF1|RPS27A|RPS3|SOS1|SRC|STAT3|TLR9|TP53|YWHAG
RNA elongation from RNA polymerase II promoter	CASP3|CCNH|CDC25A|CDK7|CDK9|CENPA|CENPF|CHEK1|CYCS|ERCC2|GTF2B|GTF2H4|GTF2I|HRAS|MNAT1|NFKB1|NFYA|POLR2C|POLR2J|POLR2K|RELA|TBP|TCEB2|TP53|YBX1
cellular macromolecular complex assembly	ADRB2|ATP7A|CCNH|CDK7|CDK9|CENPA|CENPF|DYNC1H1|EIF1AY|EIF2B1|EIF4E|ENPP1|ERCC2|GTF2B|GTF2H4|GTF2I|IRAK1|MNAT1|PAFAH1B1|POLR2C|POLR2J|POLR2K|PPP2R1A|RAC1|RPS17|RPS3|RPS5|SF3A1|SF3A2|SFRS5|SNRPD2|SRC|TBP|TCEB2|TP53|TUBA1A|TUBA4A|TUBB2C|TUBB4|TUBG1|XPO1
second-messenger-mediated signaling	ACADVL|ADRB2|AGTR1|BUB1B|C5AR1|CCR1|DGKE|ECHS1|EGFR|EHHADH|ERBB2|GNAI2|GNB1|HADHA|HADHB|HTR2B|IL8|IMPA1|KNG1|P2RY12|PAFAH1B1|PIK3C2G|PIK3CA|PIK3CB|PIK3CG|PIK3R1|PLCB2|PLCD1|PPP2R1A|PRKAA1|SOS1|SSTR1|SSTR2|SSTR3|SSTR5
intracellular signaling cascade	ADCY1|ADCY5|ADORA3|ADRB2|AGTR1|AKT1|AKT2|AKT3|ARF6|ARHGAP4|ARHGEF7|ATP5A1|ATP5D|ATP5F1|ATP7A|AURKB|B4GALT1|BDKRB2|BIRC5|BUB1|BUB1B|BUB3|C5AR1|CASK|CASP3|CCNH|CCR1|CDC2|CDC20|CDC25A|CDC42|CDC7|CDK10|CDK2|CDK7|CDK9|CDKL1|CHEK1|CHML|CHN1|CHUK|CSNK1G3|CXCL1|CXCR4|CYCS|DGKE|DYNLL1|ECT2|EGFR|EHMT1|ENPP1|ERBB2|ERCC2|FYN|GAK|GDI2|GNA12|GNAI2|GNAI3|GNB1|GNG2|GRB2|HRAS|HSP90AA1|HSP90AB1|HSPA5|HTR2B|IKBKB|I…
protein kinase cascade	ADRB2|AKT1|C5AR1|CALM1|CCL20|CCL5|CHUK|CXCL12|CXCR4|ERBB2|FYN|GNA12|GRB2|IKBKB|INS|IRAK1|MAP3K1|MAPK1|NFKBIA|PIK3CB|PKD2|PPP2R1A|PRKAA1|PRKCA|RELA|RPS3|SOS1|SRC|STAT3|TLR9
cell cycle arrest	CCR1|EIF4G2|IL8|IRAK1|PKD2|RELA|STAT3|TP53
intracellular signaling cascade	ADCY1|ADCY5|ADRB2|AGTR1|AKT1|ARF6|ARHGAP4|ARHGEF7|BUB1B|C5AR1|CASP3|CCR1|CDC42|CDK7|CHEK1|CHN1|CHUK|CXCL1|CXCR4|CYCS|DGKE|DYNLL1|ECT2|EGFR|ERBB2|FYN|GNA12|GNAI2|GNB1|GNG2|GRB2|HRAS|HSPA5|HTR2B|IL8|INS|IRAK1|MAP2K1|MAP3K1|MAPK1|MAPK3|NFKBIA|P2RY12|PIK3C2G|PIK3CA|PIK3CB|PIK3CG|PIK3R1|PKD2|PLCB2|PLCD1|PLCG1|PLCG2|PPP2R1A|PRKAA1|PRKCA|PRKCD|PRKD2|RAC1|RAF1|RHOA|RHOC|RHOD|RPS3|SOS1|SRC|SSTR1|SSTR2|SST…
Ras protein signal transduction	ADRB2|AKT1|ARF6|ARHGAP4|BDKRB2|CDC42|EGFR|ERBB2|GNA12|GNB1|GRB2|HRAS|MAP2K1|MAPK1|MAPK3|PIK3R1|RAC1|RAF1|RHOA|RHOC|RHOD|SOS1|SRC|YWHAB
Ras protein signal transduction	ARF6|ARHGAP4|CDC42|GNA12|GNB1|GRB2|HRAS|INS|MAP2K1|MAPK1|MAPK3|NFKBIA|RAC1|RAF1|RHOA|RHOC|RHOD|SOS1|SRC|YWHAB
motor axon guidance	ADRB2|AKT1|ATP7A|B4GALT1|CASP3|CCL5|CCR5|CDC7|CXCL12|CXCR4|EGFR|EIF2B1|ERBB2|IL8|INS|MAP3K1|NCL|PAFAH1B1|PIK3R1|PLCD1|PRKAA1|PRKCA|PRKCD|PRKDC|RAC1|RELA|RPS19|RPS27A|SOS1|TLR9
motor axon guidance	ACTB|AKT1|ALDH3A2|ARF6|ATP7A|B4GALT1|CASP3|CCL5|CCR5|CCR6|CDC7|CENPF|CXCL12|CXCR4|EGFR|ERBB2|IL8|INS|MAP2K1|MAP3K1|NCL|PAFAH1B1|PIK3R1|PLCD1|PRKAA1|PRKCA|PRKCD|PRKDC|RAC1|RELA|RPLP0|RPS19|RPS27A|SOS1|STAT3|TLR9|TUBB2C
motor axon guidance	AKT1|ALDH3A2|ALDH7A1|B4GALT1|CASP3|CXCL12|CXCR4|EGFR|ERBB2|INS|IRAK1|NME1-NME2|RPLP0|RPS27A
apoptotic mitochondrial changes	ADRB2|AKT1|ARF6|ATP5D|ATP7A|BIRC5|CASP3|CDK2|CHEK1|CYCS|EIF4G2|ENPP1|ERCC2|FYN|HRAS|HSP90AA1|HSPA5|IL8|INS|MAP3K1|NFKBIA|PAFAH1B1|PKD2|PPP2R1A|PRKCA|PRKDC|RAC1|RELA|RHOA|RPS27A|RPS3|SLC25A14|TP53|YWHAG
second-messenger-mediated signaling	ACADVL|ADRB2|AGTR1|BUB1B|C5AR1|CCR1|DGKE|ECHS1|EGFR|EHHADH|ERBB2|GNAI2|GNB1|HADHA|HADHB|HTR2B|IL8|IMPA1|P2RY12|PAFAH1B1|PIK3C2G|PIK3CA|PIK3CB|PIK3CG|PIK3R1|PLCB2|PLCD1|PPP2R1A|PRKAA1|SSTR1|SSTR2|SSTR3|SSTR5
renal system process	ADRB2|AGTR1|BDKRB2|COPA|GNA12|KNG1|P2RY12|PIK3CB|PIK3R1|SOS1
neuron migration	ARF6|ARFGEF1|ARHGEF1|ARHGEF7|ATP7A|C6|CXCR4|ECT2|FYN|GAA|HRAS|MBL2|PAFAH1B1|RAC1|RHOA|RPS27A|SOS1|TP53|YWHAG
activation of immune response	ARF6|ATP7A|C6|FYN|HRAS|MBL2|PAFAH1B1|RAC1|RHOA|RPS27A|TP53|YWHAG
chemotaxis	ACTB|ADORA3|ADRB2|AGTR1|AKT1|ARF6|ATP7A|B4GALT1|BDKRB2|C5AR1|C6|CASP3|CCL20|CCL21|CCL5|CCR1|CCR5|CCR6|CXCL1|CXCL12|CXCR4|ENPP1|ERBB2|GAA|GNA12|GRB2|HRAS|IKBKB|IL8|INS|IRAK1|KNG1|MAP2K1|MAP3K1|MAPK1|MBL2|NCL|NFKB1|NFKBIA|P2RY12|PAFAH1B1|PIK3CB|PINX1|PKD2|PLCD1|PPP2R1A|PRKAA1|PRKCA|PRKDC|RAC1|RELA|RPLP0|RPS17|RPS19|RPS24|RPS27A|RPS6|SOS1|SSTR5|STAT3|TERT|TLR9|TUBB2C
cellular calcium ion homeostasis	ADRB2|AGTR1|ATP7A|BDKRB2|C5AR1|C6|CCL5|CCR1|CCR5|CCR6|CXCL12|CXCR4|ENPP1|ERBB2|FYN|GAA|HTR2B|IL8|INS|KNG1|MBL2|PIK3CB|PKD2|POMC|PRKCA|RPLP0|RPS3
regulation of insulin receptor signaling pathway	ADORA3|ADRB2|AGTR1|AKT1|ATP7A|B4GALT1|CASP3|CXCL12|EGFR|ENPP1|GAA|IL8|INS|NFKBIA|PAFAH1B1|PPP1CC|PPP2R1A|PRKCA|SSTR3|TP53
positive regulation of MAP kinase activity	ACTB|ADRB2|AKT1|ALDH3A2|ARF6|ATP7A|B4GALT1|C5AR1|CASP3|CCL20|CCL5|CCR5|CCR6|CDC7|CXCL12|CXCR4|EGFR|ERBB2|IL8|INS|IRAK1|MAP2K1|MAP3K1|MAPK1|NCL|NFKBIA|PAFAH1B1|PIK3CB|PIK3R1|PLCD1|PRKAA1|PRKCA|PRKCD|PRKDC|RAC1|RELA|RPLP0|RPS19|RPS27A|SOS1|STAT3|TLR9|TUBB2C
negative regulation of cellular process	ADRB2|AGTR1|AKT1|ARF6|ATP5A1|B4GALT1|BIRC5|BUB1B|CASP3|CCL5|CCR1|CDC2|CDC42|CDC7|CDK10|CDK2|CENPF|CHEK1|CXCL1|DYNLL1|EGFR|EHMT1|ENPP1|ERBB2|GNAI2|HRAS|HSPA5|IL8|INS|KNG1|MAPK1|MAPRE1|MCC|NFKB1|NFKBIA|NME1-NME2|P2RY12|PIK3CG|PIK3R1|PIK3R2|PINX1|PPP2R1A|PRKAA1|PRKCA|RAC1|RELA|RHOA|RPS13|RPS26|RPS3|SOS1|SSTR1|SSTR2|SSTR3|SSTR5|STAT3|TP53|TTK|YWHAZ
regulation of monooxygenase activity	ADRB2|AKT1|ATP7A|BDKRB2|CASP3|CXCL12|DYNLL1|EGFR|EIF2B1|ERBB2|GAA|GRB2|IKBKB|INS|IRAK1|KNG1|MAP3K1|NFKBIA|NSDHL|PIK3CB|PIK3R1|PLCD1|PPP1CC|PRKDC|RAF1|SOS1|SRC|TP53|YWHAB
regulation of insulin receptor signaling pathway	ADORA3|ADRB2|AGTR1|AKT1|ATP7A|B4GALT1|BIRC5|BUB1B|CASP3|CHEK1|CXCL12|CYCS|DYNLL1|EGFR|ENPP1|ERBB2|ERCC2|GAA|HRAS|HSPA5|IKBKB|IL8|INS|KNG1|MAP2K1|MAP3K1|MAPK1|MCC|NFKBIA|NME1-NME2|PINX1|PPP2R1A|PRKCA|PRKDC|RELA|RPS3|SSTR3|TP53|TUBB2C|YWHAB|YWHAG
M phase	AURKB|BIRC5|BUB1|BUB1B|BUB3|CDC2|CDC20|CDC25A|CDC7|CDK10|CDK2|CENPF|CHEK1|DYNC1H1|EIF4G2|IL8|MAD2L1|MAPRE1|NEK2|NUDC|PAFAH1B1|PKD2|PLK1|RCC2|RPS27A|SMC3|SOS1|TP53|TTK|TUBA1A|TUBA4A|TUBB2C|TUBB4|TUBG1
regulation of apoptosis	ADRB2|AKT1|ARF6|ATP7A|B4GALT1|BIRC5|BUB1B|C5AR1|C6|CASP3|CDC2|CDC42|CXCR4|CYCS|DYNLL1|EGFR|EIF4G2|ERCC2|HRAS|HSPA5|IKBKB|INS|ITGB3BP|KNG1|MAP3K1|MAPK1|NFKB1|NFKBIA|NME1-NME2|PIK3CG|PIK3R1|PLCB2|PPP2R1A|PRKCA|PRKDC|RAF1|RELA|RHOA|RPL23|RPS3|SOS1|SSR2|SSTR3|TBP|TP53|TUBB2C|XPO1|YWHAB|YWHAE|YWHAG|YWHAZ
apoptotic program	ADRB2|AKT1|ATP7A|B4GALT1|CASP3|CYCS|DYNLL1|EGFR|EIF2B1|ERCC2|GAA|GRB2|IKBKB|INS|KNG1|MAP3K1|MAPK1|NFKBIA|NSDHL|PIK3R1|PLCD1|PPP1CC|PPP2R1A|PRKCA|PRKDC|RPL23|RPS3|SSR2|SSTR3|TP53|TUBB2C|XPO1|YWHAB|YWHAE|YWHAG
apoptotic mitochondrial changes	ADRB2|AKT1|ATP5D|ATP7A|BIRC5|C5AR1|CASP3|CDK2|CHEK1|CYCS|DYNLL1|EGFR|EIF4G2|ENPP1|ERCC2|HRAS|HSP90AA1|HSPA5|IL8|INS|MAP3K1|NFKBIA|PKD2|PLCB2|PPP2R1A|PRKCA|PRKDC|RELA|RHOA|RPS3|SLC25A14|TP53|YWHAB
mitosis	ATP7A|AURKB|BIRC5|BUB1|BUB1B|BUB3|CASP3|CDC2|CDC20|CDC25A|CDC7|CDK10|CDK2|CDK7|CENPF|CHEK1|DYNC1H1|EGFR|EIF4G2|ERCC2|GNAI2|GNAI3|HSPA5|IL8|INS|MAD2L1|MAPRE1|MCC|MNAT1|NEK2|NME1-NME2|NUDC|PAFAH1B1|PINX1|PKD2|PLK1|PPP2R1A|PRKCA|RCC2|RPS27A|SMC3|SOS1|SSTR2|TP53|TTK|TUBG1|YWHAG
negative regulation of apoptosis	ADRB2|AKT1|ARF6|ATP7A|B4GALT1|BIRC5|BUB1B|C6|CASP3|CDC2|CHEK1|CXCR4|CYCS|DYNLL1|EGFR|EIF2B1|EIF4G2|ERBB2|ERCC2|HNRNPA1|HRAS|HSPA5|IKBKB|INS|ITGB3BP|KNG1|MAP2K1|MAP3K1|MAPK1|MCC|NFKB1|NFKBIA|NME1-NME2|PIK3CG|PIK3R1|PINX1|PLCD1|PPP2R1A|PRKCA|PRKDC|RAF1|RELA|RHOA|RPL23|RPS17|RPS19|RPS24|RPS3|SOS1|SSTR3|TBP|TP53|TUBB2C|XPO1|YWHAB|YWHAZ
regulation of insulin receptor signaling pathway	ADCY1|ADCY5|ADRB2|ATP5A1|ATP5D|ATP5F1|ATP5J2|ATP7A|B4GALT1|DYNLL1|EGFR|EIF2B1|ENPP1|GAA|HSP90AA1|INS|MAPK1|NFKBIA|NME1-NME2|NT5C2|PPP2R1A|PRKCA|SLC25A14|TP53
regulation of monooxygenase activity	ADCY1|ADORA3|ADRB2|AGTR1|AKT1|ATP7A|B4GALT1|CASP3|DGKE|DYNLL1|EGFR|EIF2B1|ENPP1|GAA|GNB1|GNG2|GRB2|IKBKB|INS|IRAK1|KNG1|NFKBIA|NSDHL|PIK3R1|PLCD1|POMC|PPP1CC|PRKCA|PRKDC|RPS27A|TP53|YWHAB
negative regulation of apoptosis	AKT1|ATP7A|BIRC5|C6|CASP3|CCNH|CDC2|CDK7|ENPP1|ERCC2|GTF2H4|HRAS|HSPA5|MAP3K1|MAPK1|MBL2|MNAT1|NFKB1|NFKBIA|NME1-NME2|PIK3CG|PIK3R1|PPP2R1A|PRKCA|PRKCD|PRKDC|RELA|RHOA|RPS3|SOS1|SSTR3|TP53|TUBB2C|YWHAZ
positive regulation of oxidoreductase activity	ADCY1|ADH6|ADRB2|AGTR1|AKT1|ATP7A|CASP3|CDC7|CXCL12|CXCR4|DYNLL1|EGFR|EIF2B1|ENPP1|ERBB2|GAA|GNB1|GNG2|GRB2|IKBKB|INS|IRAK1|MAP3K1|NFKBIA|NSDHL|PIK3R1|PLCD1|PPP1CC|PPP2R1A|PRKCA|PRKDC|RELA|TP53|YWHAB
mitotic cell cycle spindle assembly checkpoint	BIRC5|BUB1|CDC7|CENPF|CHEK1|MAD2L1|NEK2|SMC3|TTK|TUBG1
hair follicle development	ADH1A|ADH1C|ADH6|AKT1|ATP7A|B4GALT1|CYP39A1|CYP7B1|GAA|INS|NSDHL|PKM2|PRKAA1|RHOC
DNA catabolic process	AKT1|ATP7A|B4GALT1|BIRC5|BUB1B|CASP3|CCNH|CDC2|CDK7|CHEK1|CYCS|DYNLL1|EGFR|ERBB2|ERCC2|GTF2H4|HRAS|HSPA5|IKBKB|KNG1|MAP2K1|MAP3K1|MAPK1|MCC|MNAT1|NFKB1|NME1-NME2|PIK3CG|PIK3R1|PINX1|PPP2R1A|PRKCA|PRKDC|RELA|RHOA|RPS3|SOS1|SSTR3|TP53|TUBB2C|YWHAB|YWHAZ
DNA catabolic process	AKT1|ATP7A|BIRC5|BUB1B|CASP3|CCNH|CDC2|CDK7|CYCS|EGFR|ENPP1|ERCC2|GTF2H4|HRAS|HSPA5|MAP3K1|MAPK1|MCC|MNAT1|NFKB1|NFKBIA|NME1-NME2|PIK3CG|PIK3R1|PINX1|PPP2R1A|PRKCA|PRKDC|RELA|RHOA|RPS3|SOS1|SSTR3|TP53|TUBB2C|YWHAZ
chemotaxis	ADORA3|ADRB2|AGTR1|AKT1|ATP7A|B4GALT1|BDKRB2|C5AR1|C6|CASP3|CCL20|CCL21|CCL5|CCR1|CCR5|CCR6|CXCL1|CXCL12|CXCR4|ENPP1|ERBB2|GAA|GNA12|HRAS|IKBKB|IL8|INS|KNG1|MAP2K1|MAP3K1|MAPK1|MBL2|NFKB1|P2RY12|PAFAH1B1|PIK3CB|PINX1|PKD2|PRKCA|PRKDC|RAC1|RELA|RPLP0|RPS17|RPS19|RPS24|RPS6|SSTR5|TERT|TLR9|TUBB2C
cellular calcium ion homeostasis	ADORA3|AGTR1|AKT1|ATP7A|B4GALT1|BDKRB2|C5AR1|C6|CCL20|CCL21|CCL5|CCR1|CCR5|CCR6|CDC7|CXCL1|CXCL12|CXCR4|EGFR|ERBB2|IL8|INS|IRAK1|KNG1|MAP3K1|MAPK1|MBL2|NCL|NFKB1|NFKBIA|PAFAH1B1|PIK3CB|PIK3R1|PKD2|PLCD1|PRKCA|PRKCD|PRKDC|RAC1|RELA|RPS19|RPS27A|SOS1|TLR9
regulation of insulin receptor signaling pathway	ADCY1|ADRB2|AKT1|DYNLL1|EGFR|EIF2B1|ENPP1|GNB1|GNG2|INS|MAPRE1|PPP2R1A|PRKCA
inactivation of MAPK activity	ADCY1|ADCY5|ADRB2|AGTR1|AKT1|ATP7A|EGFR|EIF2B1|ENPP1|GAA|GNAI2|GNB1|GNG2|IL8|PPP2R1A|PRKCA
regulation of MAP kinase activity	ACTB|ADRB2|AGTR1|AKT1|ARF6|ATP7A|B4GALT1|BDKRB2|C5AR1|CCL5|CCR1|CCR5|CCR6|CDC7|CXCL12|CXCR4|DGKE|EGFR|ENPP1|ERBB2|IL8|INS|IRAK1|KNG1|MAP2K1|MAP3K1|NCL|PAFAH1B1|PIK3CB|PIK3R1|PKD2|PLCD1|PPP2R1A|PRKAA1|PRKCA|PRKCD|PRKDC|RAC1|RELA|RPLP0|RPS27A|SOS1|STAT3|TLR9|TUBB2C
inactivation of MAPK activity	ADH6|AKT1|EIF2B1|ENPP1|PPP2R1A|PRKCA|RELA
apoptotic mitochondrial changes	ADRB2|AKT1|ATP5D|ATP7A|BIRC5|CASP3|CDC42|CDK2|CHEK1|CYCS|EIF4G2|ENPP1|ERCC2|HRAS|HSP90AA1|HSPA5|IL8|INS|MAP3K1|NFKBIA|PIK3R1|PINX1|PKD2|PPP2R1A|PRKCA|PRKDC|RELA|RHOA|RPS3|SLC25A14|TERT|TP53
mitotic sister chromatid segregation	BIRC5|CDC7|CDK10|CDK2|CENPF|CHEK1|HSPA5|MAD2L1|NEK2|TP53
response to copper ion	ATP5D|ATP7A|CASP3|CHEK1|CYCS|ENPP1|HRAS|HSP90AA1|HSPA5|PRKDC|RPS3|SLC25A14|TP53
positive regulation of biological process	ADRB2|AGTR1|AKT1|ARF6|B4GALT1|BIRC5|C6|CASP3|CCNH|CDC42|CDC7|CDK2|CDK7|CXCL12|DYNLL1|ECT2|EEF1D|EGFR|ENPP1|ERBB2|ERCC2|FYN|HRAS|HSP90AA1|HSP90AB1|HTR2B|IKBKE|IL8|INS|IRAK1|KNG1|MAP3K1|MAPK1|MBL2|MNAT1|NCBP1|NFKB1|NFKBIA|NME1-NME2|PIK3R1|PPP2R1A|PRKAA1|PRKCA|RAC1|RELA|RHOA|RHOC|RPS19|RPS27A|RPS3|SSTR3|SSTR5|TLR9|TP53|TTK|TUBB2C|YWHAB
regulation of apoptosis	ADRB2|AKT1|ATP7A|B4GALT1|BIRC5|CASP3|CDC2|CDC42|CDK2|CENPF|CYCS|DYNLL1|EGFR|ENPP1|ERBB2|ERCC2|GNA12|HRAS|HSPA5|INS|KNG1|MAP3K1|MAPK1|NFKB1|NFKBIA|NME1-NME2|PIK3CG|PIK3R1|PPP2R1A|PRKCA|PRKDC|RELA|RHOA|RPS27A|RPS3|SOS1|SSTR3|TP53|TUBB2C|YWHAB|YWHAG|YWHAZ
positive regulation of oxidoreductase activity	AGTR1|AKT1|ALDH3A2|ATP7A|B4GALT1|C6|CASP3|CDK2|CXCL12|CXCR4|EGFR|ENPP1|ERBB2|GNA12|INS|IRAK1|MAP3K1|MBL2|NFKBIA|NME1-NME2|P2RY12|PIK3CB|PPP2R1A|PRKAA1|PRKCA|RAC1|RHOA|RPLP0|RPS27A|RPS3|RPS6|SSTR5|TP53
motor axon guidance	ACTB|AGTR1|AKT1|ARF6|ATP7A|B4GALT1|CCL5|CCR6|CDC7|CXCL12|CXCR4|EGFR|ERBB2|IL8|INS|KNG1|MAP2K1|MAP3K1|NCL|PAFAH1B1|PIK3R1|PLCD1|PRKCA|PRKCD|PRKDC|RAC1|RELA|RPS19|RPS27A|STAT3|TLR9|TUBB2C
polysaccharide metabolic process	ACADVL|AKT1|ATP5A1|ATP5D|ATP5F1|CROT|CYCS|ENPP1|GAA|INS|PKM2|POMC|PPP1CC|PRKAA1|RHOC|SLC25A14
RNA splicing, via transesterification reactions	AKT1|CASP3|CCNH|CDC25A|CDC7|CDK7|CDK9|CHEK1|CPSF2|CYCS|DHX35|DHX9|EEF1A1|EEF1D|EEF1G|EEF2|EFTUD2|EIF1AY|EIF2B1|EIF3E|EIF3H|EIF3I|EIF4A1|EIF4A2|EIF4B|EIF4E|EIF4G1|EIF4G2|EIF5B|ERCC2|FUS|GAA|GTF2B|GTF2H4|GTF2I|HNRNPA1|HNRNPA2B1|HNRNPC|HNRNPD|HNRNPF|HNRNPH1|HNRNPK|HNRNPL|HNRNPM|HNRNPR|HNRNPU|ITGB3BP|LSM2|MNAT1|NCBP1|NFKB1|NFYA|NHP2L1|NME1-NME2|PABPC1|PAPOLA|PCBP1|PINX1|POLR2C|POLR2J|POLR2K|PPP1CC|PP…
regulation of oxidoreductase activity	AGTR1|AKT1|ATP7A|B4GALT1|CASP3|CDC42|CXCL12|CXCR4|EGFR|INS|MAP3K1|NSDHL|PIK3R1|PRKDC|RPN1|RPN2|SRC|TP53
positive regulation of oxidoreductase activity	ADRB2|AGTR1|AKT1|ATP7A|CASP3|CDC42|CDC7|CXCL12|CXCR4|DYNLL1|EGFR|EIF2B1|ERBB2|GAA|GRB2|IKBKB|INS|IRAK1|MAP3K1|NFKBIA|NSDHL|PIK3R1|PINX1|PLCD1|PPP1CC|PRKDC|RPN1|RPN2|SRC|TERT|TP53|YWHAB
JAK-STAT cascade	ADRB2|CALM1|CCR1|IKBKB|IRAK1|NFKBIA|PKD2|RELA|RPS3|STAT3
positive regulation of MAP kinase activity	ADRB2|AKT1|B4GALT1|C5AR1|CCR5|CDC7|CXCL12|CXCR4|CYP39A1|CYP7B1|EGFR|ERBB2|INS|MAP3K1|PAFAH1B1|PIK3CB|PIK3R2|PRKAA1|PRKCD|RPS27A|SOS1
ribonucleoprotein complex assembly	EIF1AY|EIF2B1|EIF4E|GTF2B|NCBP1|NHP2L1|RPLP0|RPS17|RPS24|RPS3|RPS5|SF3A1|SF3A2|SFRS5|SNRPB|SNRPD2|SNRPF
positive regulation of nitric oxide biosynthetic process	ACADVL|ADH1A|ADH1C|ADH6|ADRB2|AGTR1|AKT1|ATP5A1|ATP5D|ATP5F1|ATP7A|B4GALT1|C6|CROT|CYCS|CYP39A1|CYP7B1|EGFR|ENPP1|GAA|HSP90AA1|HSP90AB1|INS|MBL2|NSDHL|PKM2|POMC|PPP1CC|PRKAA1|RHOC|RPS27A|SLC25A14
regulation of oxidoreductase activity	ADRB2|AGTR1|AKT1|ATP7A|B4GALT1|BDKRB2|C5AR1|C6|CCL5|CXCL12|CXCR4|DGKE|EGFR|FYN|GNB1|GRB2|HTR2B|IL8|INS|KNG1|MAP3K1|MBL2|PIK3R1|PLCB2|POMC|PPP2R1A|PRKCA|RAC1
adaptive immune response	AGTR1|B4GALT1|C6|CCR6|CXCL12|CXCR4|FYN|IL8|INS|MBL2|PRKCA|PRKCD|PRKDC|RELA|TUBB2C
chemotaxis	ACTB|ADORA3|ADRB2|AGTR1|AKT1|ARF6|ATP7A|B4GALT1|BDKRB2|C5AR1|C6|CASP3|CCL20|CCL21|CCL5|CCR1|CCR5|CCR6|CXCL1|CXCL12|CXCR4|EGFR|ENPP1|ERBB2|GAA|GNA12|HRAS|HTR2B|IKBKB|IL8|INS|KNG1|MAP2K1|MAP3K1|MAPK1|MBL2|NFKB1|P2RY12|PAFAH1B1|PIK3CB|PINX1|PKD2|POMC|PPP2R1A|PRKAA1|PRKCA|PRKDC|RAC1|RELA|RPLP0|RPS17|RPS19|RPS24|RPS27A|RPS6|SOS1|SSTR5|STAT3|TERT|TLR9|TUBB2C
intracellular signaling cascade	ADCY1|ADCY5|ADRB2|AGTR1|AKT1|ARF6|ARHGAP4|ARHGEF7|ATP5A1|B4GALT1|BUB1B|C5AR1|CASP3|CCR1|CDC42|CDC7|CDK10|CDK2|CDK7|CHEK1|CHN1|CHUK|CXCL1|CXCR4|CYCS|DGKE|DYNLL1|ECT2|EGFR|ERBB2|FYN|GNA12|GNAI2|GNB1|GNG2|GRB2|HRAS|HSPA5|HTR2B|IL8|IMPA1|INS|IRAK1|MAP2K1|MAP3K1|MAPK1|MAPK3|NFKBIA|NME1-NME2|P2RY12|PAFAH1B1|PIK3C2G|PIK3CA|PIK3CB|PIK3CG|PIK3R1|PINX1|PKD2|PLCB2|PLCD1|PLCG1|PLCG2|PPP2R1A|PRKAA1|PRKCA|PRKC…
G-protein signaling, coupled to cyclic nucleotide second messenger	ADORA3|ADRB2|AGTR1|AKT1|B4GALT1|CCR1|ENPP1|GNAI2|GNAI3|GNB1|HSPA5|KNG1|P2RY12|PIK3CB|PRKCA|RPS19|SSTR1|SSTR2|SSTR3|SSTR5|TP53
second-messenger-mediated signaling	ADORA3|ADRB2|AGTR1|ATP5A1|B4GALT1|BUB1B|C5AR1|CASP3|CCR1|CDK10|CHEK1|CXCL1|DGKE|EGFR|ERBB2|GNAI2|GNAI3|GNB1|HSPA5|HTR2B|IL8|NME1-NME2|P2RY12|PIK3C2G|PIK3CA|PIK3CB|PIK3CG|PINX1|PLCB2|PPP2R1A|RPS19|SSTR1|SSTR2|SSTR3|SSTR5|TP53
positive regulation of oxidoreductase activity	AGTR1|AKT1|ATP5A1|ATP5D|ATP5F1|ATP7A|B4GALT1|CDC42|CXCL12|CXCR4|ENPP1|ERBB2|FYN|GAA|HRAS|IL8|INS|NCL|NSDHL|PAFAH1B1|PIK3R1|PLCD1|PRKCA|PRKDC|RAC1|RHOA|RPS27A|SOS1|TP53
mitosis	AURKB|BIRC5|BUB1|BUB1B|BUB3|CASP3|CDC2|CDC20|CDC25A|CDC7|CDK10|CDK2|CDK7|CENPF|CHEK1|DYNC1H1|EGFR|EIF4G2|ERCC2|IL8|MAD2L1|MAPRE1|MCC|MNAT1|NEK2|NME1-NME2|NUDC|PAFAH1B1|PINX1|PKD2|PLK1|RCC2|RPS27A|SMC3|SOS1|TP53|TTK|TUBG1
mitosis	AURKB|BIRC5|BUB1|BUB1B|BUB3|CASP3|CDC2|CDC20|CDC25A|CDC7|CDK10|CDK2|CDK7|CENPF|CHEK1|DYNC1H1|EGFR|EIF4G2|ERCC2|IL8|MAD2L1|MAPRE1|MCC|MNAT1|NEK2|NME1-NME2|NUDC|PAFAH1B1|PINX1|PKD2|PLK1|RCC2|RPS27A|SMC3|SOS1|TP53|TTK|TUBG1
regulation of apoptosis	ADRB2|AKT1|ATP7A|B4GALT1|BIRC5|CASP3|CDC2|CDC42|CENPF|CYCS|DYNLL1|ENPP1|ERBB2|ERCC2|GNA12|HRAS|HSPA5|KNG1|MAPK1|NFKB1|NFKBIA|NME1-NME2|PIK3CG|PIK3R1|PPP2R1A|PRKCA|RELA|RHOA|RPS27A|RPS3|SOS1|SSTR3|TP53|TUBB2C|YWHAB|YWHAG|YWHAZ
cytosolic calcium ion homeostasis	AGTR1|AKT1|B4GALT1|BDKRB2|C5AR1|CCR1|CCR5|CCR6|CDC7|CXCL12|CXCR4|ERBB2|KNG1|PAFAH1B1|PRKAA1|PRKCD|RPS27A
cellular macromolecular complex assembly	ADRB2|ATP7A|CCNH|CDK7|CDK9|CENPA|CENPF|EIF1AY|EIF2B1|EIF4E|ERCC2|GTF2B|GTF2H4|GTF2I|IRAK1|MNAT1|NCBP1|NHP2L1|POLR2C|POLR2J|POLR2K|PPP2R1A|RAC1|RPLP0|RPS17|RPS24|RPS3|RPS5|SF3A1|SF3A2|SFRS5|SNRPB|SNRPD2|SNRPF|SRC|TBP|TCEB2|TP53|TUBA1A|TUBA4A|TUBB2C|TUBB4|TUBG1|XPO1
cellular macromolecular complex assembly	ADRB2|ATP7A|CCNH|CDK7|CDK9|CENPA|CENPF|EIF1AY|EIF2B1|EIF4E|ERCC2|GTF2B|GTF2H4|GTF2I|IRAK1|MNAT1|NCBP1|NHP2L1|POLR2C|POLR2J|POLR2K|PPP2R1A|RAC1|RPLP0|RPS17|RPS24|RPS3|RPS5|SF3A1|SF3A2|SFRS5|SNRPB|SNRPD2|SNRPF|SRC|TBP|TCEB2|TP53|TUBA1A|TUBA4A|TUBB2C|TUBB4|TUBG1|XPO1
response to copper ion	AKT1|ATP5D|ATP7A|CDC42|CXCL12|CXCR4|EGFR|ENPP1|GRB2|IL8|INS|KNG1|NFKBIA|NSDHL|PAFAH1B1|PIK3CB|PIK3R1|PINX1|PRKCA|PRKCD|PRKDC|RPN1|RPN2|SOS1|SRC|TERT|TP53
phosphoinositide phosphorylation	ADRB2|AKT1|BDKRB2|C5AR1|COPA|CXCR4|DGKE|EGFR|ERBB2|GNA12|GRB2|IL8|IMPA1|IRAK1|KNG1|MAP3K1|MAPK1|P2RY12|PAFAH1B1|PIK3C2G|PIK3CA|PIK3CB|PIK3CG|PIK3R1|PLCB2|PLCD1|PPP2R1A|PRKAA1|PRKCA|RAF1|SOS1|SRC
regulation of cell-matrix adhesion	ADRB2|B4GALT1|COPA|ERBB2|GNA12|GNAI2|INS|KNG1|MAP3K1|P2RY12|PIK3CB|PIK3R1|SSTR2
positive regulation of oxidoreductase activity	AGTR1|AKT1|ATP5A1|ATP5D|ATP5F1|ATP7A|CDC42|CXCL12|CXCR4|ENPP1|HRAS|IL8|INS|NSDHL|PAFAH1B1|PIK3R1|PINX1|PRKCA|PRKCD|PRKDC|RHOA|RPN1|RPN2|SRC|TERT|TP53
lipid modification	ACADVL|AGTR1|BUB1B|C5AR1|CROT|CYP39A1|CYP7B1|DGKE|ECHS1|EGFR|EHHADH|ERBB2|GNB1|HADH|HADHA|HADHB|HTR2B|IMPA1|PAFAH1B1|PIK3C2G|PIK3CA|PIK3CB|PIK3CG|PIK3R1|PLCB2|PLCD1|PLCG1|PLCG2|PPP2R1A|PRKAA1
DNA catabolic process	AKT1|CASP3|CCNH|CDK7|CYCS|DYNLL1|ERBB2|ERCC2|GTF2H4|IKBKB|INS|MAP2K1|MAP3K1|MNAT1|PPP2R1A|PRKCA|RELA|RPS3|SLC25A14|SSTR3|TP53|YWHAB|YWHAG
motor axon guidance	AKT1|ATP7A|B4GALT1|CCR5|CDC7|CXCL12|CXCR4|ERBB2|FYN|GAA|HRAS|IL8|NCL|PAFAH1B1|PLCD1|PRKAA1|PRKCD|RAC1|RPS27A|SOS1

## Sheet: HCC_markers_KEGG pathways
Group leading term	Group HCC significant genes
Caprolactam degradation	ACAT1|ALDH3A2|ALDH7A1|CASP3|DBT|ECHS1|EHHADH|EHMT1|HADH|HADHA|HADHB|HSD17B10
Purine metabolism	ADCY1|ADCY5|ENPP1|GAA|GCK|NT5C2|PKM2|POLR2C|POLR2J|POLR2K|UGT2B17
Non-small cell lung cancer	ACTB|ADCY1|ADCY5|ADRB2|AGTR1|AKT1|AKT2|AKT3|ARHGEF1|ARHGEF7|BDKRB2|BIRC5|CALM1|CASK|CASP3|CCL5|CDC2|CDC42|CDK2|CHUK|CXCL1|CXCL12|CXCR4|CYCS|DGKE|EGFR|EIF4B|EIF4E|ERBB2|FYN|GCK|GNA12|GNAI1|GNAI2|GNAI3|GNAZ|GRB2|HRAS|HSPA8|HTR2B|IKBKB|IKBKE|IL8|IMPA1|INS|IRAK1|MAP2K1|MAP3K1|MAPK1|MAPK3|MYC|NFKB1|NFKBIA|PAK1|PAK2|PIK3C2G|PIK3CA|PIK3CB|PIK3CG|PIK3R1|PIK3R2|PKM2|PLCB1|PLCB2|PLCD1|PLCG1|PLCG2|POMC|PPP1…
Long-term depression	GNA12|GNAI1|GNAI2|GNAI3|GNAZ|HRAS|MAP2K1|MAPK1|MAPK3|MYC|PLCB1|PLCB2|PPP2R1A|PRKCA|RAC1|RAF1|RHOA|SSR4|TP53
Bladder cancer	ACTB|CDC42|EGFR|ERBB2|FYN|HRAS|IL8|MAP2K1|MAPK1|MAPK3|MYC|PLCB1|PLCB2|PPP2R1A|PRKCA|RAC1|RAF1|RHOA|SRC|TP53
Pancreatic cancer	ACTB|ADCY1|ADCY5|AKT1|AKT2|AKT3|ARHGEF1|ARHGEF7|BDKRB2|CALM1|CDC42|CHUK|CXCL12|CXCR4|EGFR|ERBB2|FYN|GNA12|GNAI1|GNAI2|GNAI3|GRB2|HRAS|IKBKB|IL8|INS|MAP2K1|MAP3K1|MAPK1|MAPK3|MYC|NCL|NFKB1|PAK1|PAK2|PIK3CA|PIK3CB|PIK3CG|PIK3R1|PIK3R2|PLCB1|PLCB2|PPP1CC|PPP2R1A|PRKCA|PRKCD|PXN|RAC1|RAF1|RELA|RHOA|RHOD|SOS1|SRC|STAT3|TP53|TUBA1A|TUBA4A|TUBB|TUBB2C|TUBB4|YWHAZ
Glioma	ACTB|ADCY1|ADCY5|AKT1|AKT2|AKT3|CALM1|CASK|CASP3|CDC2|CDC42|CXCL12|CXCR4|EGFR|ERBB2|FYN|GNA12|GNAI1|GNAI2|GNAI3|GNAZ|GRB2|HRAS|HTR2B|IL8|MAP2K1|MAP3K1|MAPK1|MAPK3|MYC|PAK1|PAK2|PIK3CA|PIK3CB|PIK3CG|PIK3R1|PIK3R2|PLCB1|PLCB2|PLCG1|PLCG2|POMC|PPP1CC|PPP2R1A|PRKCA|PRKCD|RAC1|RAF1|RHOA|RHOD|SOS1|SRC|TP53|TUBA1A|TUBA4A|TUBB|TUBB2C|TUBB4
Galactose metabolism	B4GALT1|CALM1|CASP3|ENPP1|GAA|GCK|GRB2|HADH|HSD17B10|HSPA5|HTT|IMPA1|INS|NT5C2|PRKAA1|RPN1|RPN2|RPSA|TP53|UGT2B17
Neurodegenerative Diseases	CALM1|CASP3|CDC2|CDK2|CHEK1|CYCS|GRB2|HSPA5|HTT|TP53
Fatty acid metabolism	ACADVL|ACAT1|ADH1A|ADH1C|ADH6|ALDH3A2|ALDH7A1|DBT|DGKE|ECHS1|EHHADH|EHMT1|GCK|HADH|HADHA|HADHB|HSD17B10|PKM2|UGT2B17
